# Supplementary material for: Enantioselective one-carbon expansion of aromatic rings by simultaneous formation and chromoselective irradiation of a transient coloured enolate
Source: Royal Society of Chemistry journal article supplement (doi:10.1039/d1sc06684f), 2022-01-01
Supplement: d1sc06684f1.pdf [file d1sc06684f1.pdf]

# Enantioselective one-carbon ring expansion of aromatic rings by simultaneous formation and chromoselective irradiation of a transient coloured enolate

Rakesh K. Saunthwal, James Mortimer, Andrew J. Orr-Ewing and Jonathan Clayden\*

## Experimental

|                                                                                              |          |
|----------------------------------------------------------------------------------------------|----------|
| General Information                                                                          | S2       |
| Analytical Information                                                                       | S2       |
| UV-visible Spectroscopy Measurements                                                         | S3       |
| Literature Known Starting Materials                                                          | S3       |
| General Procedure 1: Synthesis of <i>rac</i> - <i>N</i> -(1-Phenylethyl)-1-methylethylamine  | S3       |
| General Procedure 2: Synthesis of ( <i>R</i> )- <i>N</i> -(1-Phenylethyl)-1-methylethylamine | S4       |
| General Procedure 3: Synthesis of ( <i>S</i> )- <i>N</i> -(1-Phenylethyl)-1-methylethylamine | S4       |
| General Procedure 4: Starting material synthesis                                             | S5       |
| General Procedure 5: General procedure for the synthesis of amides 4.                        | S5       |
| General Procedure 6: Enantioselective Photochemical Ring Expansion                           | S5       |
| General Procedure 7: <i>rac</i> -Photochemical Ring Expansion                                | S6       |
| General Procedure 8: Stereospecific Photochemical Ring Expansion                             | S7       |
| General Procedure 9: <i>rac</i> -Stereospecific Photochemical Ring Expansion                 | S7       |
| Analytical data for amines                                                                   | S8       |
| Analytical data for amides                                                                   | S8-S17   |
| X-ray crystallography Data                                                                   | S17-S22  |
| Analytical data for enantioselective photochemical ring expansion                            | S22-S36  |
| Analytical data for product modifications                                                    | S36-S38  |
| Analytical data for stereospecific photochemical ring expansion                              | S38-S41  |
| Analytical data for carbolithiation and photochemical rearrangements                         | S42      |
| Mechanistic Study                                                                            | S43-S53  |
| Experimental setup for ReactIR                                                               | S43      |
| React-IR study                                                                               | S43-S46  |
| NMR Study                                                                                    | S47-S49  |
| VCD spectra                                                                                  | S50-S53  |
| Time-Dependent DFT Calculation                                                               | S54-S56  |
| Copies of <sup>1</sup> H, <sup>13</sup> C and HPLC spectra                                   | S57-S184 |

## 1 Experimental

**1.1 General Information:** Reactions requiring anhydrous conditions (where specified) were executed under dry nitrogen or argon atmospheres in glassware that was dried using either a combination of vacuum and heat-gun, oven, or flame drying. Reaction mixtures were stirred magnetically. Air- and moisture-sensitive liquids and solutions were transferred via syringe into the reaction vessels through rubber septa. All reagents were purchased (unless specified) at highest commercial quality and used as received. Non-anhydrous solvents were purchased (unless specified) at the highest commercial quality and used as received. Anhydrous CH<sub>2</sub>Cl<sub>2</sub> and THF were obtained from the University of Bristol's dry solvent system and were purified by filtration over a column of activated alumina. All temperatures described below –10 °C were achieved using a Julabo cryostat.

### 1.2 Analytical Information:

**Rf:** TLC was performed on aluminium-backed silica plates (0.2 mm, 60 F254) which were developed using standard visualising agents: UV fluorescence (254 & 366 nm), phosphomolybdic acid / Δ, vanillin / Δ, potassium permanganate / Δ and Seebach / Δ. Chromatography: Flash chromatography was performed on an automated Biotage Isolera TM Spectra Four using gradient elution on pre-packed silica gel Biotage® Sfar Silica D Duo columns.

**MP:** Melting points were measured on a Kofler hotstage melting point apparatus and are uncorrected.

**IR:** IR spectra were recorded on neat compounds using a Perkin Elmer (Spectrum One) FT-IR spectrometer (ATR sampling accessory). Only strong and selected absorbance's ( $\nu_{\max}$  expressed in cm<sup>-1</sup>) are reported.

**<sup>1</sup>H NMR:** Spectra were recorded on Jeol ECS (400 MHz) or Bruker NMR (400 MHz or 500 MHz) instruments. Chemical shifts ( $\delta$  H) are quoted in parts per million (ppm) was used. Spin-spin coupling constants (*J*) are reported in Hertz (Hz). 2D NMR experiments NOSTY, HSQC and HMBC where necessary.

**<sup>13</sup>C NMR:** Spectra were recorded on Jeol ECS (101 MHz) or Bruker NMR (101 MHz or 125 MHz) instruments. Chemical shifts ( $\delta$  C) are quoted in parts per million (ppm) and referenced to the appropriate solvent peak(s). Spin-spin coupling constants (*J*) are reported in Hertz (Hz).

**HRMS:** High resolution mass spectra were recorded on a Bruker Daltonics MicrOTOF 2 mass spectrometer (ESI).

**High Performance Liquid Chromatography:** Enantiomeric ratios were determined by HPLC on Agilent 1100 series or Agilent Technologies 1260 Infinity with UV detection at 280 and 254. Chiral Regis Whelk O1 and CHIRALPAK® IA with hexane:2-propanol (IPA) as the eluent for all separations, unless otherwise stated. If the temperature could be set the separation was performed at 25 °C otherwise room temperature.

**UV-Vis:** UV-visible spectra were recorded on an Agilent Cary Series 300 UV-Vis Spectrophotometer.

### 1.3 UV-visible Spectroscopy Measurements

To an oven-dried 1 mm cuvette was attached a septum and secured with Parafilm<sup>®</sup>. The cuvette was swing-purged using a Schlenk line before being washed with *n*-butyl lithium (0.1 mL) and dry THF (0.1 mL) to remove any excess water. The cuvette was then placed in an ice bath before addition of a solution of enolate ( $\sim 4 \times 10^{-4}$  mmol/mL formed from the corresponding amide and deprotonation with 1 equivalent of *n*-butyl lithium) in dry THF by syringe. The cuvette was kept in an ice bath until running the spectrum.

A blank sample containing *n*-butyl lithium and dry THF was ran before UV-vis measurements.

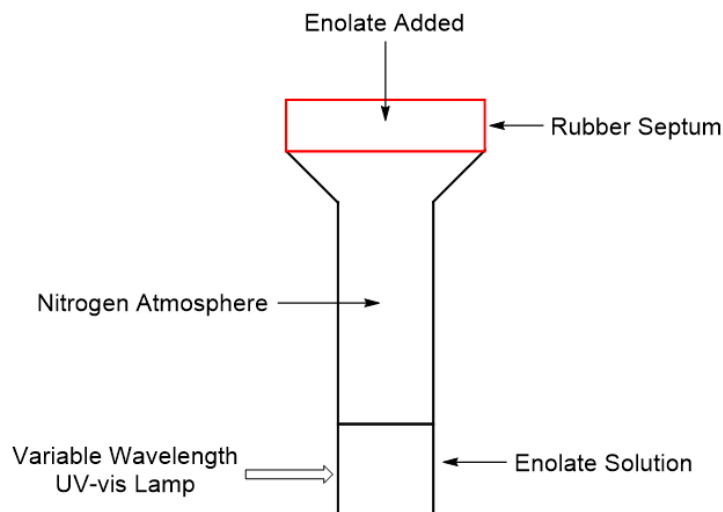

### 1.4 Known Starting Materials

Starting material amines<sup>1</sup> and *N*-benzyl-*N*-(alkyl)benzamides were prepared according to the procedures reported. Spectroscopic data for the materials prepared as described above were consistent with those reported in the literature.

#### Synthesis of *N*-(1-Phenylethyl)-1-methylethylamine

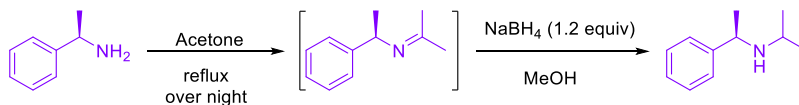

<sup>1</sup> S. Leleu, C. Papamicael, F. Marsais, G. Dupas, V. Levacher *Tetrahedron:Asymmetry* **2004**, 15 3919–3928

**1.5 General Procedure 1: Synthesis of *rec*-*N*-(1-Phenylethyl)-1-methylethylamine.** A solution of  $\alpha$ -methylbenzylamine (10 g) in acetone (300 mL) was refluxed for 16 h. After evaporation of the solvent *in vacuo*, the residue was dissolved in methanol (350 mL) and sodium tetrahydroborate (3.2 g) was slowly added at 0 °C. The solution was stirred for 2.5 h at 20 °C. After evaporation of the solvent *in vacuo*, water (30 mL) was added, and the resulting aqueous phase was extracted with CH<sub>2</sub>Cl<sub>2</sub> (3  $\times$  30 mL). The combined organic layers were dried (MgSO<sub>4</sub>) and concentrated *in vacuo*. Purification by flash silica chromatography (20% EtOAC/Hexane) afforded the title amine in 80% yield.

**1.6 General Procedure 2: Synthesis of (*R*)-*N*-(1-Phenylethyl)-1-methylethylamine.** A solution of (*R*)- $\alpha$ -methylbenzylamine in acetone (400 mL) was refluxed for 12 h. After evaporation of the solvent under vacuum, the residue was dissolved in methanol (300 mL) and sodium tetrahydroborate (1.5 g, 39.7 mmol) was slowly added at 0 °C. The solution was stirred for 2 h at 20 °C. After evaporation of the solvent *in vacuo*, water (30 mL) was added, and the resulting aqueous phase was extracted with CH<sub>2</sub>Cl<sub>2</sub> (3  $\times$  30 mL). The combined organic layers were dried (MgSO<sub>4</sub>) and concentrated *in vacuo*. Purification by flash silica chromatography (20% EtOAC/Hexane) afforded the title amine in 80% yield.

**1.7 General Procedure 3: Synthesis of (*S*)-*N*-(1-Phenylethyl)-1-methylethylamine.<sup>2</sup>** A solution of (*S*)- $\alpha$ -methylbenzylamine in acetone (400 mL) was refluxed 12 h. After evaporation of the solvent under vacuum, the residue was dissolved in methanol (300 mL) and sodium tetrahydroborate (1.5 g, 39.7 mmol) was slowly added at 0 °C. The solution was stirred for 2 h at 20 °C. After evaporation of the solvent *in vacuo*, water (30 mL) was added and the resulting aqueous phase was extracted with CH<sub>2</sub>Cl<sub>2</sub> (3  $\times$  30 mL). The combined organic layers were dried (MgSO<sub>4</sub>) and concentrated *in vacuo*. Purification by flash silica chromatography (20% EtOAC/Hexane) afforded the title amine in 80% yield.

---

<sup>2</sup> D. M. Mercea, M. G. Howlett, A. D. Piascik, D J. Scott, A Steven, A E. Ashley, M. J. Fuchter *Chem. Commun.*, **2019**, 55, 7077



### 1.8 General Procedure 4: Starting material 2 synthesis<sup>3</sup>.

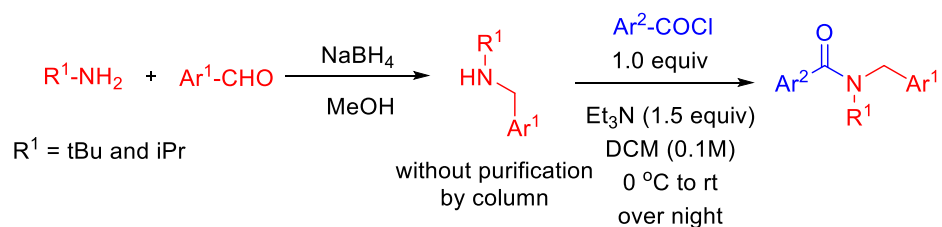

*tert*-Butylamine (20 mmol, 1.0 equiv.) and aldehyde (20 mmol, 1.0 equiv) were dissolved in MeOH (50 mL). The resulting mixture was stirred for 3 h at RT, and then NaBH<sub>4</sub> (1.2 equiv) was added portion-wise at 0 °C and warmed to room temperature. After 2 h, water (30 mL) was added to the solution and then extracted with CH<sub>2</sub>Cl<sub>2</sub>. The combined organic layer was dried over Na<sub>2</sub>SO<sub>4</sub> and then evaporated under reduced pressure to give the secondary amine. The product was used in the next step without further purification.

The acid chloride (1.0 equiv) was added dropwise to a solution of *N*-alkyl benzylamine (3.59 mmol, 1.0 equiv) and triethyl amine (1.5 equiv) in CH<sub>2</sub>Cl<sub>2</sub> (0.1M) at 0 °C. The mixture was allowed to warm to room temperature overnight. The reaction was quenched with water and the aqueous layer was extracted with CH<sub>2</sub>Cl<sub>2</sub> (3 × 10 mL). The combined organics were washed with brine (1 × 10 mL), dried over MgSO<sub>4</sub> and concentrated under reduced pressure to give a crude residue. Purification by flash silica chromatography (5% to 20% EtOAC/Hexane) afforded the title compound.

### 1.9 General Procedure 5: General procedure for the synthesis of amides 10.

The acid chloride (1.0 equiv) was added dropwise to a solution of *N*-(1-phenylethyl)propan-2-amine (2.31 mmol to 3.61 mmol) and triethyl amine (2.0 equiv) in CH<sub>2</sub>Cl<sub>2</sub> (0.2M) at 0 °C. The mixture was allowed to warm to room temperature for 12 h. The reaction was quenched with water, and the aqueous layer was extracted with CH<sub>2</sub>Cl<sub>2</sub> (3 × 10 mL). The combined organics were washed with brine (1 × 10 mL), dried over MgSO<sub>4</sub> and concentrated under reduced pressure to give a crude residue. Purification by flash silica chromatography (10% to 20% EtOAC/Hexane) afforded the title compound.

<sup>3</sup> Y. Nakagawa, S. Chanthamath, Y. Liang, K. Shibatomi, S. Iwasa *J. Org. Chem.* **2019**, 84, 2607–2618,

### 1.10 General Procedure 6: Enantioselective Photochemical Ring Expansion

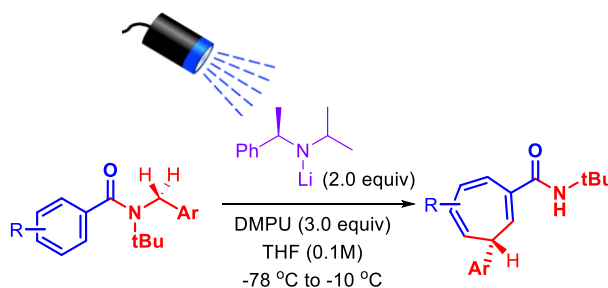

To a suspension of chiral amine (2.0 equiv.) in dry THF (0.1 M) at  $-78\text{ }^{\circ}\text{C}$  was added *n*-butyl lithium (3.0 equiv, 2.5 M in hexanes), dropwise. The resulting mixture was allowed to warm to room temperature over 15 minutes, resulting in a clear yellow solution. This was then cooled down to  $-78\text{ }^{\circ}\text{C}$  before a solution of amide (0.28 mmol to 0.39 mmol) in THF (0.5 mL) was added dropwise and the reaction mixture was stirred at 700 rpm and irradiated with a 40 W Kessil Tuna Blue lamp. The mixture was stirred at  $-78\text{ }^{\circ}\text{C}$  for 30 minutes, then the temperature of the Cryostat was set to  $-10\text{ }^{\circ}\text{C}$  and the reaction mixture was slowly allowed to warm. After a further 1 h, DMPU (3.0 equiv.) was added, and further irradiation was continued until consumption of the amide was observed by TLC. The reaction was quenched with sat. aq.  $\text{NH}_4\text{Cl}$  (15 mL), and the aqueous layer was extracted with EtOAc ( $3 \times 10\text{ mL}$ ). The combined organic fractions were washed with brine, dried ( $\text{Na}_2\text{SO}_4$ ) and evaporated to yield a crude product, which was purified by flash chromatography, eluting with EtOAc/petrol to afford the title compound.

### 1.10 General Procedure 7: *rec*-Photochemical Ring Expansion

Freshly prepared LDA (2.0 equiv) in dry THF (0.1M) was cooled to  $-10\text{ }^{\circ}\text{C}$  and a solution of amide (0.30 mmol) in THF (0.5 mL) and DMPU (3.0 equiv.) were sequentially added dropwise, and the reaction mixture was stirred at 700 rpm and irradiated with a 40 W Kessil Tuna Blue lamp until consumption of the amide was observed by TLC. Saturated ammonium chloride solution was added, the layers separated, and the aqueous layer was extracted with ethyl acetate. The combined organic fractions were washed with brine, dried ( $\text{Na}_2\text{SO}_4$ ) and evaporated to yield a crude product, which was purified by flash chromatography, eluting with EtOAc/petrol, affording the title compound.

### 1.11 General Procedure 8: Stereospecific Photochemical Ring Expansion

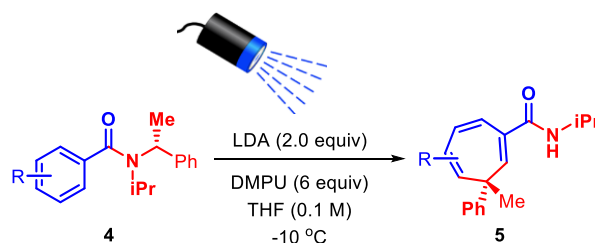

The chiral amide (0.33 mmol to 0.37 mmol) was dissolved in dry THF (0.1 M) under a nitrogen atmosphere. After cooling down to -10 °C, freshly prepared LDA (2.0 equiv) and DMPU (6.0 equiv) were sequentially added dropwise, and the reaction mixture was stirred at 700 rpm and irradiated with a 40 W Kessil Tuna Blue lamp until consumption of the amide was observed by TLC. The reaction was quenched with sat. aq.  $\text{NH}_4\text{Cl}$  (15 mL), and the aqueous layer was extracted with EtOAc ( $3 \times 10$  mL). The combined organics were washed with brine ( $1 \times 10$  mL), dried over  $\text{MgSO}_4$  and concentrated under reduced pressure to give a crude residue. Purification by flash silica chromatography (10 to 15% EtOAc/Hexane) afforded the title compound.

### 1.12 General Procedure 9: rec-Stereospecific Photochemical Ring Expansion

The chiral amide (0.3 mmol) was dissolved in dry THF (0.1 M) under a nitrogen atmosphere. After cooling down to -10 °C, freshly prepared LDA (2.0 equiv) and DMPU (6.0 equiv) were sequentially added dropwise, and the reaction mixture was stirred at 700 rpm and irradiated with a 40 W Kessil Tuna Blue lamp until consumption of the amide was observed by TLC. The reaction was quenched with sat. aq.  $\text{NH}_4\text{Cl}$  (15 mL), and the aqueous layer was extracted with EtOAc ( $3 \times 10$  mL). The combined organics were washed with brine ( $1 \times 10$  mL), dried over  $\text{MgSO}_4$  and concentrated under reduced pressure to give a crude residue. Purification by flash silica chromatography (10 to 15% EtOAc/Hexane) afforded the title compound.

### 1.13 Analytical data of amine

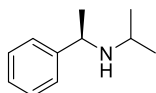

**IR** (neat,  $\text{cm}^{-1}$ ) 3315, 2962, 1451, 1169, 759, 698, 585, 554, 517

**(R)-N-(1-Phenylethyl)-1-methylethylamine<sup>1</sup> (1c).** The crude product was purified by flash silica chromatography (hexane/EtOAc = 80/20) to afford **1c** as colorless oil;  $[\alpha]_{\text{D}}^{23} = 68$  ( $c = 1.00$  in  $\text{CHCl}_3$ ); **<sup>1</sup>H NMR** (400 MHz, Chloroform-*d*)  $\delta$  7.39 – 7.22 (m, 5H), 3.92 (q,  $J = 6.6$  Hz, 1H), 2.66 (hept,  $J = 6.3$  Hz, 1H), 1.38 (d,  $J = 6.6$  Hz, 3H), 1.06 (d,  $J = 6.2$  Hz, 3H), 1.03 (d,  $J = 6.4$  Hz, 3H). **<sup>13</sup>C NMR** (101 MHz, Chloroform-*d*)  $\delta$  146.09, 128.41, 126.75, 126.46, 55.09, 45.55, 24.88, 24.06, 22.19. **HRMS** (ESI<sup>+</sup>)  $m/z$  calcd for  $\text{C}_{11}\text{H}_{17}\text{NNa}$   $[\text{M} + \text{Na}]^+$  186.1259, found 186.1262.

### 1.14 Analytical data of amides

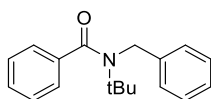

**N-benzyl-N-(tert-butyl)benzamide<sup>4</sup> (2a);** By following general Procedure 4: The crude product was purified by flash silica chromatography (hexane/EtOAc = 90/10) to afford **2a** as colorless needles (720 mg, 75%); **MP:** 121–123 °C;  $\nu_{\text{max}}/\text{cm}^{-1}$ (neat): 2971, 1636, 1391, 1361, 1203, 704; **<sup>1</sup>H NMR** (400 MHz, Chloroform-*d*)  $\delta$  7.39 – 7.34 (m, 2H), 7.31 – 7.23 (m, 5H), 7.22 – 7.15 (m, 3H), 4.57 (s, 2H), 1.47 (s, 9H). **<sup>13</sup>C NMR** (101 MHz, Chloroform-*d*)  $\delta$  173.95, 140.11, 139.39, 129.03, 128.59, 128.43, 127.06, 126.40, 126.29, 58.12, 51.68, 28.82. **HRMS** (ESI) calcd for  $[\text{C}_{18}\text{H}_{21}\text{NONa}]$  requires  $[\text{M} + \text{Na}]^+$  290.1521, found 290.1524.

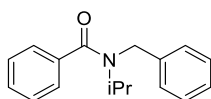

**N-benzyl-N-isopropylbenzamide<sup>5</sup> (2a'),** By following general Procedure 4: The crude product was purified by flash silica chromatography (hexane/EtOAc = 90/10) to afford **2a'** as pale-yellow needles (750 mg, 83%); **MP:** 68–70 °C;  $\nu_{\text{max}}/\text{cm}^{-1}$ (neat): 2976, 1626, 1411, 1341, 1175, 1060, 699; **<sup>1</sup>H NMR** (400 MHz, Chloroform-*d*)  $\delta$  7.50 – 7.11 (m, 10H), 4.67 (s, 2H), 1.33 – 0.96 (m, 6H). **<sup>13</sup>C**

<sup>4</sup> P.-L. Lagueux-Tremblay, A. Fabrikant, B. A. Arndtsen ACS Catal. **2018**, 8, 5350–5354

<sup>5</sup> D. Lu, H.-X. Wei, J. Zhang, Y. Gu, P. Osenkowski, W. Ye, D. J. Selkoe, M. S. Wolfe, C. E. Augelli-Szafran *Bioorg. Med. Chem. Lett.* **2016**, 26, 2129–2132

**NMR** (101 MHz, Chloroform-*d*)  $\delta$  172.33, 139.52, 137.48, 129.31, 128.61, 128.52, 127.12, 126.91, 126.33, 50.84, 43.39, 21.49. **HRMS** (ESI) calcd for  $[C_{17}H_{19}NONa]$  requires  $[M+Na]^+$  276.1359, found 276.1364.

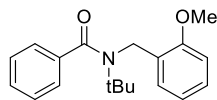

***N*-(tert-butyl)-*N*-(2-methoxybenzyl)benzamide (2b)**, By following general Procedure 4: The crude product was purified by flash silica chromatography (hexane/EtOAc = 85/15) to afford **2b** as colorless needles (700 mg, 66%); **MP**: 122-124 ° C;  $\nu_{\max}$  /cm<sup>-1</sup>(neat): 2976, 1628, 1490, 1461, 1391, 1239, 1198, 1025, 752, 705; **<sup>1</sup>H NMR** (400 MHz, Chloroform-*d*)  $\delta$  7.48 – 7.36 (m, 3H), 7.32 – 7.21 (m, 4H), 7.02 (t, *J* = 7.3 Hz, 1H), 6.80 (d, *J* = 8.1 Hz, 1H), 4.59 (s, 2H), 3.74 (s, 3H), 1.53 (s, 9H). **<sup>13</sup>C NMR** (101 MHz, Chloroform-*d*)  $\delta$  174.14, 155.96, 139.51, 128.80, 128.18, 128.11, 127.88, 127.70, 126.06, 120.25, 110.10, 57.88, 55.13, 46.57, 28.54. **HRMS** (ESI) calcd for  $[C_{19}H_{23}NO_2Na]$  requires  $[M+Na]^+$  320.1621, found 320.1623.

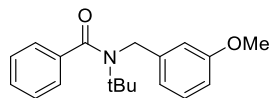

***N*-(tert-butyl)-*N*-(3-methoxybenzyl)benzamide (2c)**, By following general Procedure 4: The crude product was purified by flash silica chromatography (hexane/EtOAc = 85/15) to afford **2c** as colorless needles (740 mg, 69%); **MP**: 82-84 ° C;  $\nu_{\max}$  /cm<sup>-1</sup>(neat): 2971, 1632, 1488, 1388, 1252, 1198, 1047, 971, 750, 698, 655; **<sup>1</sup>H NMR** (400 MHz, Chloroform-*d*)  $\delta$  7.45 – 7.39 (m, 2H), 7.30 (q, *J* = 3.7 Hz, 3H), 7.24 (dd, *J* = 8.9, 7.6 Hz, 1H), 6.83 (d, *J* = 7.7 Hz, 1H), 6.80 – 6.75 (m, 2H), 4.59 (s, 2H), 3.79 (s, 3H), 1.54 (s, 9H). **<sup>13</sup>C NMR** (101 MHz, Chloroform-*d*)  $\delta$  173.80, 159.81, 141.79, 139.29, 129.59, 128.97, 128.38, 126.17, 118.59, 112.26, 112.05, 58.10, 55.18, 51.56, 28.74. **HRMS** (ESI) calcd for  $[C_{19}H_{23}NO_2Na]$  requires  $[M+Na]^+$  320.1621, found 320.1628.

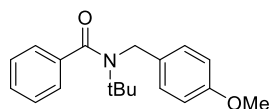

***N*-(tert-butyl)-*N*-(4-methoxybenzyl)benzamide (2d)**, By following general Procedure 4: The crude product was purified by flash silica chromatography (hexane/EtOAc = 85/15) to afford **2d** as colorless needles (780 mg, 73%); **MP**: 122-124 ° C;  $\nu_{\max}$  /cm<sup>-1</sup>(neat): 2971, 1630, 1511, 1388, 1243, 1032, 750, 699; **<sup>1</sup>H NMR** (400 MHz, Chloroform-*d*)  $\delta$  7.44 – 7.37 (m, 2H), 7.31 – 7.26 (m, 3H), 7.11 (d, *J* = 8.8 Hz, 2H), 6.85 (d, *J* = 8.7 Hz, 2H), 4.54 (s, 2H), 3.78 (s, 3H), 1.49 (s, 9H). **<sup>13</sup>C**

**NMR** (101 MHz, CDCl<sub>3</sub>)  $\delta$  173.86, 158.61, 139.33, 131.84, 128.96, 128.35, 127.45, 126.28, 113.92, 57.97, 55.28, 51.01, 28.74. **HRMS** (ESI) calcd for [C<sub>19</sub>H<sub>23</sub>NO<sub>2</sub>Na] requires [M+Na]<sup>+</sup> 320.1626, found 320.1632.

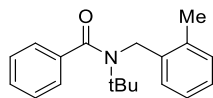

**N-(tert-butyl)-N-(2-methylbenzyl)benzamide (2e)**, By following general Procedure 4: The crude product was purified by flash silica chromatography (hexane/EtOAc = 90/10) to afford **2e** as colorless needles (630 mg, 62%); **MP**: 96-98 ° C;  $\nu_{\text{max}}$  /cm<sup>-1</sup>(neat): 2971, 1631, 1393, 1197, 1066, 699; **<sup>1</sup>H NMR** (400 MHz, Chloroform-*d*)  $\delta$  7.48 (d, *J* = 7.7 Hz, 1H), 7.32 (dd, *J* = 7.8, 1.5 Hz, 2H), 7.29 – 7.17 (m, 4H), 7.14 (t, *J* = 7.4 Hz, 1H), 7.05 (d, *J* = 7.4 Hz, 1H), 4.46 (s, 2H), 2.05 (s, 3H), 1.53 (s, 9H). **<sup>13</sup>C NMR** (101 MHz, CHLOROFORM-*D*)  $\delta$  174.04, 139.32, 137.96, 133.86, 130.38, 128.94, 128.29, 126.75, 126.37, 126.05, 125.87, 58.15, 49.12, 28.62, 19.00. **HRMS** (ESI) calcd for [C<sub>19</sub>H<sub>23</sub>NONa] requires [M+Na]<sup>+</sup> 304.1672, found 304.1665.

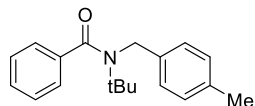

**N-(tert-butyl)-N-(4-methylbenzyl)benzamide (2f)**, By following general Procedure 4: The crude product was purified by flash silica chromatography (hexane/EtOAc = 90/10) to afford **2f** as colorless needles (780 mg, 77%); **MP**: 72-74 ° C;  $\nu_{\text{max}}$  /cm<sup>-1</sup>(neat): 2971, 1631, 1385, 1199, 1066, 790, 654, 698; **<sup>1</sup>H NMR** (400 MHz, Chloroform-*d*)  $\delta$  7.42 – 7.36 (m, 2H), 7.29 – 7.23 (m, 3H), 7.13 – 7.05 (m, 4H), 4.55 (s, 2H), 2.31 (s, 3H), 1.49 (s, 9H). **<sup>13</sup>C NMR** (101 MHz, CHLOROFORM-*D*)  $\delta$  173.93, 139.45, 137.02, 136.66, 129.27, 128.99, 128.42, 126.32, 58.08, 51.46, 28.82, 21.11. **HRMS** (ESI) calcd for [C<sub>19</sub>H<sub>24</sub>NO] requires [M+ H]<sup>+</sup> 282.1852, found 282.1862.

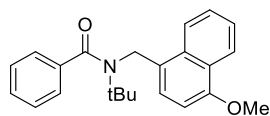

**N-(tert-butyl)-N-((4-methoxynaphthalen-1-yl)methyl)benzamide (2g)**, By following general Procedure 4: The crude product was purified by flash silica chromatography (hexane/EtOAc = 80/20) to afford **2g** as colorless needles (805 mg, 64%); **MP**: 160-162 ° C;  $\nu_{\text{max}}$  /cm<sup>-1</sup>(neat): 2971, 1621, 1586, 1384, 1265, 1195, 1089, 697, 749; **<sup>1</sup>H NMR** (400 MHz, Chloroform-*d*)  $\delta$  8.35 – 8.27 (m, 1H), 7.67 – 7.62 (m, 1H), 7.60 (d, *J* = 8.0 Hz, 1H), 7.50 – 7.42 (m, 2H), 7.40 (dd, *J* = 7.9, 1.6

Hz, 2H), 7.24 – 7.13 (m, 3H), 6.90 (d,  $J = 8.0$  Hz, 1H), 4.91 (s, 2H), 4.03 (s, 3H), 1.58 (s, 9H).  $^{13}\text{C}$  NMR (101 MHz, Chloroform- $d$ )  $\delta$  174.07, 154.73, 139.25, 130.60, 128.87, 128.17, 126.90, 126.68, 125.72, 125.63, 125.13, 124.25, 122.91, 121.61, 103.04, 58.25, 55.52, 48.56, 28.59. HRMS (ESI) calcd for  $[\text{C}_{23}\text{H}_{25}\text{NO}_2\text{Na}]$  requires  $[\text{M}+\text{Na}]^+$  370.1777, found 370.1781.

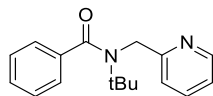

***N*-(tert-butyl)-*N*-(pyridin-2-ylmethyl)benzamide (2h)**, By following general Procedure 4: The crude product was purified by flash silica chromatography (hexane/EtOAc = 80/20) to afford **2h** as colorless needles (630 mg, 65%); **MP**: 94-96 ° C;  $\nu_{\text{max}}$  / $\text{cm}^{-1}$ (neat): 2971, 1633, 1388, 1197, 974, 749, 699;  $^1\text{H}$  NMR (400 MHz, Chloroform- $d$ )  $\delta$  8.48 (ddd,  $J = 4.9, 1.8, 0.9$  Hz, 1H), 7.64 (td,  $J = 7.7, 1.8$  Hz, 1H), 7.40 – 7.35 (m, 2H), 7.30 – 7.21 (m, 4H), 7.14 – 7.09 (m, 1H), 4.66 (s, 2H), 1.46 (s, 9H).  $^{13}\text{C}$  NMR (101 MHz, CHLOROFORM- $D$ )  $\delta$  174.04, 159.66, 149.37, 139.37, 136.53, 129.03, 128.41, 126.24, 122.08, 121.11, 58.07, 53.46, 28.80. HRMS (ESI) calcd for  $[\text{C}_{17}\text{H}_{20}\text{N}_2\text{ONa}]$  requires  $[\text{M}+\text{Na}]^+$  291.1473, found 291.1475.

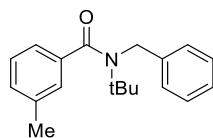

***N*-benzyl-*N*-(tert-butyl)-3-methylbenzamide (2i)**, By following general Procedure 4: The crude product was purified by flash silica chromatography (hexane/EtOAc = 90/10) to afford **2i** as colorless needles (650 mg, 71%); **MP**: 93-95° C;  $\nu_{\text{max}}$  / $\text{cm}^{-1}$ (neat): 2967, 1633, 1386, 1358, 1195, 973, 739, 701;  $^1\text{H}$  NMR (400 MHz, Chloroform- $d$ )  $\delta$  7.33 – 7.27 (m, 2H), 7.24 – 7.15 (m, 5H), 7.15 – 7.06 (m, 2H), 4.59 (s, 2H), 2.26 (s, 3H), 1.49 (s, 9H).  $^{13}\text{C}$  NMR (101 MHz, Chloroform- $d$ )  $\delta$  174.16, 140.20, 139.33, 138.20, 129.74, 128.54, 128.27, 127.05, 127.02, 126.44, 123.19, 58.06, 51.72, 28.82, 21.39. HRMS (ESI) calcd for  $[\text{C}_{19}\text{H}_{24}\text{NO}]$  requires  $[\text{M}+\text{H}]^+$  282.1858, found 282.1864.

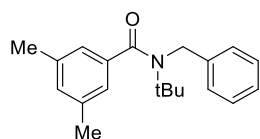

***N*-benzyl-*N*-(tert-butyl)-3,5-dimethylbenzamide (2j)**, By following general Procedure 4: The crude product was purified by flash silica chromatography (hexane/EtOAc = 90/10) to afford **2j** as colorless needles (520 mg, 59%); **MP**: 92-94 ° C;  $\nu_{\text{max}}$  / $\text{cm}^{-1}$ (neat): 2969, 1633, 1390, 1358, 1196, 855, 746;  $^1\text{H}$  NMR (400 MHz, Chloroform- $d$ )  $\delta$  7.34 – 7.28 (m, 2H), 7.22 (t,  $J = 7.3$  Hz,

3H), 6.99 (s, 2H), 6.93 – 6.89 (m, 1H), 4.60 (s, 2H), 2.24 – 2.21 (m, 6H), 1.49 (s, 9H).  $^{13}\text{C}$  NMR (101 MHz, Chloroform-*d*)  $\delta$  174.34, 140.29, 139.31, 138.00, 130.55, 128.49, 126.97, 126.49, 123.99, 57.98, 51.76, 28.82, 21.26. HRMS (ESI) calcd for  $[\text{C}_{20}\text{H}_{25}\text{NONa}]$  requires  $[\text{M}+\text{Na}]^+$  318.1828, found 318.1843.

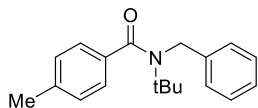

***N*-benzyl-*N*-(*tert*-butyl)-4-methylbenzamide (2k)**, By following general Procedure 4: The crude product was purified by flash silica chromatography (hexane/EtOAc = 90/10) to afford **2k** as colorless needles (690 mg, 75%); **MP**: 123-125 ° C;  $\nu_{\text{max}}$  / $\text{cm}^{-1}$ (neat): 2971, 1631, 1384, 1358, 1199, 1074, 958. 829, 744, 701;  $^1\text{H}$  NMR (400 MHz, Chloroform-*d*)  $\delta$  7.34 – 7.28 (m, 4H), 7.25 – 7.19 (m, 3H), 7.10 – 7.05 (m, 2H), 4.61 (s, 2H), 2.29 (s, 3H), 1.49 (s, 9H).  $^{13}\text{C}$  NMR (101 MHz, Chloroform-*d*)  $\delta$  174.18, 140.26, 139.04, 136.50, 129.02, 128.56, 127.00, 126.42, 126.39, 58.03, 51.75, 28.83, 21.34. HRMS (ESI) calcd for  $[\text{C}_{19}\text{H}_{23}\text{NONa}]$  requires  $[\text{M} + \text{Na}]^+$  304.1672, found 304.1686.

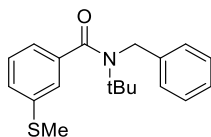

***N*-benzyl-*N*-(*tert*-butyl)-3-(methylthio)benzamide (2l)**, By following general Procedure 4: The crude product was purified by flash silica chromatography (hexane/EtOAc = 85/15) to afford **2l** as pale yellow needles (500 mg, 59%); **MP**: 101-103 ° C;  $\nu_{\text{max}}$  / $\text{cm}^{-1}$ (neat): 2971, 1633, 1384, 1358, 1253, 1198, 977, 746;  $^1\text{H}$  NMR (400 MHz, Chloroform-*d*)  $\delta$  7.35 – 7.29 (m, 2H), 7.26 – 7.19 (m, 4H), 7.19 – 7.13 (m, 3H), 4.58 (s, 2H), 2.30 (s, 3H), 1.51 (s, 9H).  $^{13}\text{C}$  NMR (101 MHz,  $\text{CDCl}_3$ )  $\delta$  173.29, 140.03, 138.93, 128.70, 128.56, 127.22, 127.01, 126.22, 123.60, 122.79, 58.20, 51.56, 28.67, 15.46. HRMS (ESI) calcd for  $[\text{C}_{19}\text{H}_{23}\text{NOSNa}]$  requires  $[\text{M}+\text{Na}]^+$  336.1393, found 336.1395.

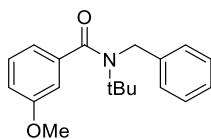

***N*-benzyl-*N*-(*tert*-butyl)-3-methoxybenzamide<sup>5</sup> (2m)**, By following general Procedure 4: The crude product was purified by flash silica chromatography (hexane/EtOAc = 85/15) to afford **2m** as colorless needles (750 mg, 85%); **MP**: 92-93 ° C;  $\nu_{\text{max}}$  / $\text{cm}^{-1}$ (neat): 2971, 1633, 1452, 1391, 1358, 1197, 1046, 699, 744;  $^1\text{H}$  NMR (400 MHz, Chloroform-*d*)  $\delta$  7.35 – 7.28 (m, 2H), 7.25 –



7.16 (m, 4H), 6.98 (dt,  $J = 7.5, 1.1$  Hz, 1H), 6.91 – 6.87 (m, 1H), 6.85 – 6.80 (m, 1H), 4.60 (s, 2H), 3.65 (s, 3H), 1.51 (s, 9H).  $^{13}\text{C}$  NMR (101 MHz, Chloroform- $d$ )  $\delta$  173.58, 159.36, 140.47, 140.18, 129.50, 128.51, 126.93, 126.27, 118.43, 115.31, 111.18, 58.10, 55.17, 51.58, 28.69. HRMS (ESI) calcd for  $[\text{C}_{19}\text{H}_{23}\text{NO}_2\text{Na}]$  requires  $[\text{M}+\text{Na}]^+$  297.1721, found 320.1625.

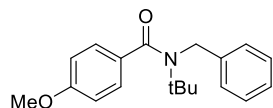

***N*-benzyl-*N*-(*tert*-butyl)-4-methoxybenzamide<sup>6</sup> (2n)**, By following general Procedure 4: The crude product was purified by flash silica chromatography (hexane/EtOAc = 85/15) to afford **2n** as colorless needles (710 mg, 81%); **MP**: 130-132 ° C;  $\nu_{\text{max}}$  /cm<sup>-1</sup>(neat): 2970, 1630, 1382, 1246, 1027, 838, 745, 702;  $^1\text{H}$  NMR (400 MHz, Chloroform- $d$ )  $\delta$  7.39 – 7.34 (m, 2H), 7.30 (t,  $J = 7.4$  Hz, 2H), 7.21 (t,  $J = 7.3$  Hz, 3H), 6.80 – 6.75 (m, 2H), 4.62 (s, 2H), 3.75 (s, 3H), 1.47 (s, 9H).  $^{13}\text{C}$  NMR (101 MHz, Chloroform- $d$ )  $\delta$  173.96, 160.31, 140.37, 131.68, 128.57, 128.32, 127.01, 126.46, 113.66, 58.01, 55.34, 51.85, 28.83. HRMS (ESI) calcd for  $[\text{C}_{19}\text{H}_{23}\text{NO}_2\text{Na}]$  requires  $[\text{M}+\text{Na}]^+$  320.1621, found 320.1609.

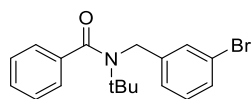

***N*-(3-bromobenzyl)-*N*-(*tert*-butyl)benzamide (2o)**, By following general Procedure 4: The crude product was purified by flash silica chromatography (hexane/EtOAc = 90/10) to afford **2o** as colorless needles (600 mg, 48%); **MP**: 116-118 ° C;  $\nu_{\text{max}}$  /cm<sup>-1</sup>(neat): 2971, 1632, 1383, 1195, 1069, 968, 774;  $^1\text{H}$  NMR (400 MHz, Chloroform- $d$ )  $\delta$  7.38 – 7.34 (m, 3H), 7.33 – 7.26 (m, 4H), 7.22 – 7.12 (m, 2H), 4.56 (s, 2H), 1.50 (s, 9H).  $^{13}\text{C}$  NMR (101 MHz, CHLOROFORM- $D$ )  $\delta$  173.93, 142.58, 139.06, 130.24, 130.19, 129.43, 129.21, 128.54, 126.11, 124.95, 122.81, 58.28, 51.10, 28.86. HRMS (ESI) calcd for  $[\text{C}_{18}\text{H}_{20}\text{BrNONa}]$  requires  $[\text{M}+\text{Na}]^+$  368.0620, found 368.0615.

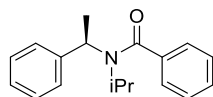

**(*R*)-*N*-isopropyl-*N*-(1-phenylethyl)benzamide (10a)**, By following general procedure 5: The acid chloride (1.0 equiv) was added dropwise to a solution of *N*-(1-phenylethyl)propan-2-amine

<sup>6</sup> J. Clayden, K. Tchabanenko, S. A. Yasin, M. D. Turnbull. *Synlett* **2001** (2), 302-304.

(3.61 mmol) and triethyl amine (2.0 equiv) in CH<sub>2</sub>Cl<sub>2</sub> (0.2M) at 0 °C. The mixture was allowed to warm to room temperature for 12 h. The reaction was quenched with water, and the aqueous layer was extracted with CH<sub>2</sub>Cl<sub>2</sub> (3 × 10 mL). The combined organics were washed with brine (1 × 10 mL), dried over MgSO<sub>4</sub> and concentrated under reduced pressure to give a crude residue. The crude product was purified by flash silica chromatography (hexane/EtOAc = 90/10) to afford **10a** as colorless oil (705 mg, 73%);  $\nu_{\text{max}}$  /cm<sup>-1</sup>(neat): 2976, 1630, 1439, 1333, 854, 756; <sup>1</sup>H NMR (400 MHz, Chloroform-*d*)  $\delta$  7.47 – 7.37 (m, 5H), 7.35 (dd, *J* = 7.2, 3.2 Hz, 4H), 7.27 (d, *J* = 4.3 Hz, 1H), 4.91 (d, *J* = 6.2 Hz, 1H), 3.38 (br s, 1H), 1.65 (br s, 3H), 1.45 (br s, 3H), 1.14 (s, 3H). <sup>13</sup>C NMR (101 MHz, Chloroform-*d*)  $\delta$  171.45, 138.81, 134.63, 130.67, 128.98, 128.89, 128.70, 128.38, 127.30, 125.88, 59.93 (br), 39.12 (br), 21.15 (br), 20.33 (br), 17.70 (br). HRMS (ESI) calcd for [C<sub>18</sub>H<sub>21</sub>NONa] requires [M+Na]<sup>+</sup> 290.1521, found 290.1520.

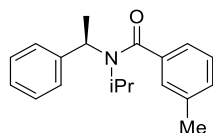

**(R)-N-isopropyl-3-methyl-N-(1-phenylethyl)benzamide (10b)**, By following general procedure 5: The acid chloride (1.0 equiv) was added dropwise to a solution of *N*-(1-phenylethyl)propan-2-amine (3.26 mmol) and triethyl amine (2.0 equiv) in CH<sub>2</sub>Cl<sub>2</sub> (0.2M) at 0 °C. The mixture was allowed to warm to room temperature for 12 h. The reaction was quenched with water, and the aqueous layer was extracted with CH<sub>2</sub>Cl<sub>2</sub> (3 × 10 mL). The combined organics were washed with brine (1 × 10 mL), dried over MgSO<sub>4</sub> and concentrated under reduced pressure to give a crude residue. The crude product was purified by flash silica chromatography (hexane/EtOAc = 90/10) to afford **10b** as colorless oil (690 mg, 75%);  $\nu_{\text{max}}$  /cm<sup>-1</sup>(neat): 2971, 1632, 1435, 1353, 756, 699; <sup>1</sup>H NMR (400 MHz, Chloroform-*d*)  $\delta$  7.33 (d, *J* = 4.7 Hz, 4H), 7.28 – 7.19 (m, 4H), 7.19 – 7.15 (m, 1H), 4.90 (br s, 1H), 3.36 (br s, 1H), 2.37 (s, 3H), 1.64 (br s, 3H), 1.44 (br s, 3H), 1.14 (d, *J* = 6.7 Hz, 3H). <sup>13</sup>C NMR (101 MHz, Chloroform-*d*)  $\delta$  171.65, 138.80, 138.54, 129.60, 128.53, 128.36, 127.32, 126.53, 122.77, 56.07 (br), 48.55 (br), 21.53, 21.14 (br), 20.33 (br), 17.69 (br). HRMS (ESI) calcd for [C<sub>19</sub>H<sub>23</sub>NONa] requires [M+Na]<sup>+</sup> 304.1677, found 304.1683.

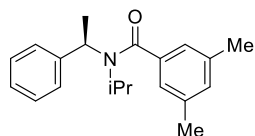

**(*R*)-*N*-isopropyl-3,5-dimethyl-*N*-(1-phenylethyl)benzamide (10c)**, By following general procedure 5: The acid chloride (1.0 equiv) was added dropwise to a solution of *N*-(1-phenylethyl)propan-2-amine (3.00 mmol) and triethyl amine (2.0 equiv) in CH<sub>2</sub>Cl<sub>2</sub> (0.2M) at 0 °C. The mixture was allowed to warm to room temperature for 12 h. The reaction was quenched with water, and the aqueous layer was extracted with CH<sub>2</sub>Cl<sub>2</sub> (3 × 10 mL). The combined organics were washed with brine (1 × 10 mL), dried over MgSO<sub>4</sub> and concentrated under reduced pressure to give a crude residue. The crude product was purified by flash silica chromatography (hexane/EtOAc = 90/10) to afford **4c** as colorless needles (630 mg, 71%); **MP**: 81-83 °C;  $\nu_{\text{max}}$  /cm<sup>-1</sup> (neat): 2976, 1629, 1435, 1333, 854, 756, 698; <sup>1</sup>H NMR (400 MHz, Chloroform-*d*)  $\delta$  7.34 (d, *J* = 4.5 Hz, 4H), 7.29 – 7.22 (m, 1H), 7.02 (d, *J* = 11.7 Hz, 3H), 4.93 (br s, 1H), 3.39 (br s, 1H), 2.33 (s, 6H), 1.65 (br s, 3H), 1.45 (br s, 3H), 1.14 (d, *J* = 6.7 Hz, 3H). <sup>13</sup>C NMR (101 MHz, CDCl<sub>3</sub>)  $\delta$  171.74, 138.75, 138.23, 130.31, 128.25, 127.26, 123.36, 60.40 (br), 49.88 (br), 21.33, 21.05 (br), 20.27 (br), 14.21. **HRMS** (ESI) calcd for [C<sub>20</sub>H<sub>25</sub>NONa] requires [M+Na]<sup>+</sup> 318.1824, found 318.1828.

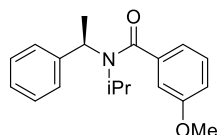

**(*R*)-*N*-isopropyl-3-methoxy-*N*-(1-phenylethyl)benzamide (10d)**, By following general procedure 5: The acid chloride (1.0 equiv) was added dropwise to a solution of *N*-(1-phenylethyl)propan-2-amine (2.95 mmol) and triethyl amine (2.0 equiv) in CH<sub>2</sub>Cl<sub>2</sub> (0.2M) at 0 °C. The mixture was allowed to warm to room temperature for 12 h. The reaction was quenched with water, and the aqueous layer was extracted with CH<sub>2</sub>Cl<sub>2</sub> (3 × 10 mL). The combined organics were washed with brine (1 × 10 mL), dried over MgSO<sub>4</sub> and concentrated under reduced pressure to give a crude residue. The crude product was purified by flash silica chromatography (hexane/EtOAc = 90/10) to afford **10d** as colorless needles (685 mg, 78%); **MP**: 78-80 °C;  $\nu_{\text{max}}$  /cm<sup>-1</sup> (neat): 2971, 1629, 1433, 1351, 1236, 749; <sup>1</sup>H NMR (400 MHz, Chloroform-*d*)  $\delta$  7.37 – 7.29 (m, 5H), 7.27 – 7.20 (m, 1H), 7.00 (d, *J* = 7.5 Hz, 1H), 6.96 (s, 1H), 6.90 (ddd, *J* = 8.3, 2.6, 0.9 Hz, 1H), 4.89 (br s, 1H), 3.81 (s, 3H), 3.37 (br s, 1H), 1.63 (br s, 3H), 1.44 (br s, 3H), 1.14 (d, *J* = 6.7 Hz, 3H). <sup>13</sup>C NMR (101 MHz, Chloroform-*d*)  $\delta$  171.14, 159.81, 140.03, 129.87, 128.38, 127.31, 118.02, 114.72, 111.45, 56.97 (br), 55.45, 48.08 (br), 21.13 (br), 20.25 (br), 17.64 (br). **HRMS** (ESI) calcd for [C<sub>19</sub>H<sub>23</sub>NO<sub>2</sub>Na] requires [M+Na]<sup>+</sup> 320.1621, found 320.1626.

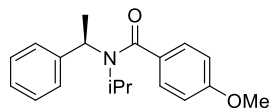

**(R)-N-isopropyl-4-methoxy-N-(1-phenylethyl)benzamide (10e)**, By following general procedure 5: The acid chloride (1.0 equiv) was added dropwise to a solution of *N*-(1-phenylethyl)propan-2-amine (2.95 mmol) and triethyl amine (2.0 equiv) in CH<sub>2</sub>Cl<sub>2</sub> (0.2M) at 0 °C. The mixture was allowed to warm to room temperature for 12 h. The reaction was quenched with water, and the aqueous layer was extracted with CH<sub>2</sub>Cl<sub>2</sub> (3 × 10 mL). The combined organics were washed with brine (1 × 10 mL), dried over MgSO<sub>4</sub> and concentrated under reduced pressure to give a crude residue. The crude product was purified by flash silica chromatography (hexane/EtOAc = 90/10) to afford **10e** as colorless needles (640 mg, 73%); **MP**: 84-86 °C;  $\nu_{\text{max}}$  /cm<sup>-1</sup>(neat): 2976, 1625, 1511, 1432, 1360, 1246, 1174, 1024; **<sup>1</sup>H NMR** (400 MHz, Chloroform-*d*)  $\delta$  7.39 (d, *J* = 8.8 Hz, 2H), 7.31 (d, *J* = 4.4 Hz, 4H), 7.24 (q, *J* = 4.6 Hz, 1H), 6.90 (d, *J* = 8.8 Hz, 2H), 4.96 (q, *J* = 6.7 Hz, 1H), 3.80 (s, 3H), 3.46 (s, 1H), 1.65 (d, *J* = 6.8 Hz, 3H), 1.42 (d, *J* = 6.6 Hz, 3H), 1.13 (d, *J* = 6.7 Hz, 3H). **<sup>13</sup>C NMR** (101 MHz, Chloroform-*d*)  $\delta$  171.45, 160.12, 131.13, 128.36, 127.73, 127.36, 127.26, 113.96, 60.48 (br), 55.39, 48.51 (br), 21.21 (br), 20.48 (br), 17.88 (br). **HRMS** (ESI) calcd for [C<sub>19</sub>H<sub>23</sub>NO<sub>2</sub>Na] requires [M+Na]<sup>+</sup> 320.1621, found 320.1619.

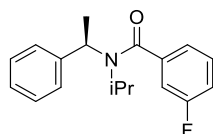

**(R)-3-fluoro-N-isopropyl-N-(1-phenylethyl)benzamide (10f)** By following general procedure 5: The acid chloride (1.0 equiv) was added dropwise to a solution of *N*-(1-phenylethyl)propan-2-amine (3.20 mmol) and triethyl amine (2.0 equiv) in CH<sub>2</sub>Cl<sub>2</sub> (0.2M) at 0 °C. The mixture was allowed to warm to room temperature for 12 h. The reaction was quenched with water, and the aqueous layer was extracted with CH<sub>2</sub>Cl<sub>2</sub> (3 × 10 mL). The combined organics were washed with brine (1 × 10 mL), dried over MgSO<sub>4</sub> and concentrated under reduced pressure to give a crude residue. The crude product was purified by flash silica chromatography (hexane/EtOAc = 90/10) to afford **10f** as colorless oil (540 mg, 59%);  $\nu_{\text{max}}$  /cm<sup>-1</sup>(neat): 2972, 1629, 1583, 1441, 1327, 1055, 785, 749, 697; **<sup>1</sup>H NMR** (400 MHz, Chloroform-*d*)  $\delta$  7.45 – 7.33 (m, 5H), 7.33 – 7.27 (m, 1H), 7.25 (d, *J* = 7.6 Hz, 1H), 7.18 (d, *J* = 8.8 Hz, 1H), 7.11 (tdd, *J* = 8.6, 2.6, 1.0 Hz, 1H), 4.90 (d, *J* = 6.3 Hz, 1H), 3.44 (br s, 1H), 1.69 (br s, 3H), 1.48 (br s, 3H), 1.16 (s, 3H). **<sup>13</sup>C NMR** (101 MHz,

Chloroform-*d*)  $\delta$  169.76, 162.69(d  $^1J_{CF}$  = 248.46 Hz), 140.67 (d,  $^3J_{CF}$  = 7.49 Hz), 130.50 (d,  $^3J_{CF}$  = 7.07 Hz), 128.39, 127.50, 127.18, 121.50 (d,  $^4J_{CF}$  = 3.03 Hz), 115.85 (d,  $^2J_{CF}$  = 21.21 Hz), 113.33 (d,  $^2J_{CF}$  = 23.23 Hz), 56.27 (br), 48.79 (br), 21.02 (br), 20.17 (br), 17.69 (br). **HRMS** (ESI) calcd for [C<sub>18</sub>H<sub>20</sub>FNONa] requires [M+Na]<sup>+</sup> 308.1427, found 308.1431.

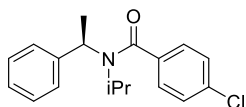

**(R)-4-chloro-N-isopropyl-N-(1-phenylethyl)benzamide (10g)** By following general procedure 5: The acid chloride (1.0 equiv) was added dropwise to a solution of *N*-(1-phenylethyl)propan-2-amine (2.92 mmol) and triethyl amine (2.0 equiv) in CH<sub>2</sub>Cl<sub>2</sub> (0.2M) at 0 °C. The mixture was allowed to warm to room temperature for 12 h. The reaction was quenched with water, and the aqueous layer was extracted with CH<sub>2</sub>Cl<sub>2</sub> (3 × 10 mL). The combined organics were washed with brine (1 × 10 mL), dried over MgSO<sub>4</sub> and concentrated under reduced pressure to give a crude residue. The crude product was purified by flash silica chromatography (hexane/EtOAc = 90/10) to afford **10g** as colorless oil (590 mg, 67%);  $\nu_{\max}$  /cm<sup>-1</sup>(neat): 2971, 1630, 1565, 1443, 784, 749, 699; **<sup>1</sup>H NMR** (400 MHz, Chloroform-*d*)  $\delta$  8.71 – 8.61 (m, 2H), 7.37 – 7.20 (m, 7H), 4.77 (q, *J* = 6.9 Hz, 1H), 3.31 (s, 1H), 1.78 – 1.26 (m, 6H), 1.13 (d, *J* = 6.8 Hz, 3H). **<sup>13</sup>C NMR** (101 MHz, Chloroform-*d*)  $\delta$  168.72, 150.46, 145.99, 128.55, 127.22, 120.38, 57.15 (br), 48.34 (br), 21.01 (br), 19.87 (br), 17.48 (br). **HRMS** (ESI) calcd for [C<sub>18</sub>H<sub>20</sub>ClNONa] requires [M+Na]<sup>+</sup> 324.1131, found 324.1136.

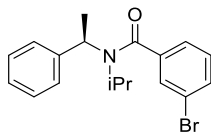

**(R)-3-bromo-N-isopropyl-N-(1-phenylethyl)benzamide (10h)** By following general procedure 5: The acid chloride (1.0 equiv) was added dropwise to a solution of *N*-(1-phenylethyl)propan-2-amine (2.31 mmol) and triethyl amine (2.0 equiv) in CH<sub>2</sub>Cl<sub>2</sub> (0.2M) at 0 °C. The mixture was allowed to warm to room temperature for 12 h. The reaction was quenched with water, and the aqueous layer was extracted with CH<sub>2</sub>Cl<sub>2</sub> (3 × 10 mL). The combined organics were washed with brine (1 × 10 mL), dried over MgSO<sub>4</sub> and concentrated under reduced pressure to give a crude residue. The crude product was purified by flash silica chromatography (hexane/EtOAc = 90/10) to afford **10h** as colorless oil (554 mg, 69%);  $\nu_{\max}$  /cm<sup>-1</sup>(neat): 2972, 1628, 1435, 1361, 1322,

1065, 796, 723, 695, 657;  $^1\text{H NMR}$  (400 MHz, Chloroform-*d*)  $\delta$  7.60 (s, 1H), 7.54 (ddd,  $J = 7.9$ , 2.0, 1.2 Hz, 1H), 7.43 – 7.26 (m, 7H), 4.95 – 4.78 (m, 1H), 3.45 (br s, 1H), 1.69 (br s, 3H), 1.47 (br s, 3H), 1.17 (d,  $J = 6.7$  Hz, 3H).  $^{13}\text{C NMR}$  (101 MHz,  $\text{CDCl}_3$ )  $\delta$  169.52, 140.54, 131.96, 130.27, 128.97, 128.40, 127.18, 124.35, 122.79, 65.86 (br), 48.48 (br), 20.99 (br), 20.23 (br), 17.78 (br). **HRMS** (ESI) calcd for  $[\text{C}_{18}\text{H}_{20}\text{BrNONa}]$  requires  $[\text{M}+\text{Na}]^+$  368.0626, found 368.0629.

### 1.15 X-ray crystallography Data

#### X-ray Structure of **4k**

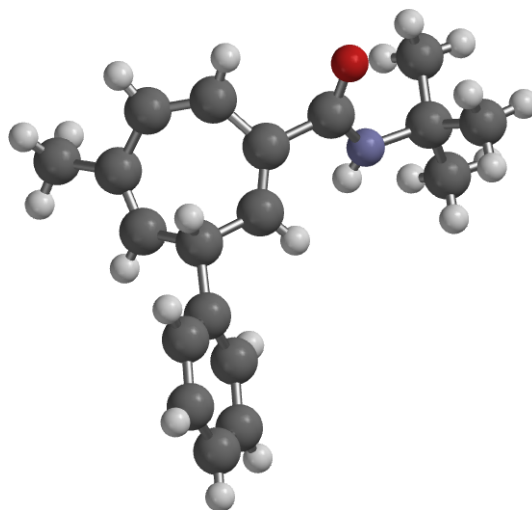

Colorless crystals of **4k** were grown from a hexanes/Acetone solution by slow volatilization. CCDC: 2083306

|                        |                                     |              |                                     |
|------------------------|-------------------------------------|--------------|-------------------------------------|
| Bond precision:        | C-C = 0.0020 Å                      |              | Wavelength=1.54178                  |
| Cell:                  | a=5.8270(3)                         | b=16.2460(7) | c=16.8144(8)                        |
|                        | alpha=90                            | beta=90      | gamma=90                            |
| Temperature:           | 100 K                               |              |                                     |
|                        | Calculated                          |              | Reported                            |
| Volume                 | 1591.74(13)                         |              | 1591.74(13)                         |
| Space group            | P 21 21 21                          |              | P 21 21 21                          |
| Hall group             | P 2ac 2ab                           |              | P 2ac 2ab                           |
| Moiety formula         | C <sub>19</sub> H <sub>23</sub> N O |              | C <sub>19</sub> H <sub>23</sub> N O |
| Sum formula            | C <sub>19</sub> H <sub>23</sub> N O |              | C <sub>19</sub> H <sub>23</sub> N O |
| Mr                     | 281.38                              |              | 281.38                              |
| Dx, g cm <sup>-3</sup> | 1.174                               |              | 1.174                               |

|                                         |             |                                |
|-----------------------------------------|-------------|--------------------------------|
| Z                                       | 4           | 4                              |
| Mu (mm-1)                               | 0.553       | 0.553                          |
| F000                                    | 608.0       | 608.0                          |
| F000'                                   | 609.61      |                                |
| h,k,lmax                                | 7,19,20     | 7,19,20                        |
| Nref                                    | 2907[ 1707] | 2906                           |
| Tmin,Tmax                               | 0.923,0.967 | 0.511,0.754                    |
| Tmin'                                   | 0.802       |                                |
| Correction method= # Reported T Limits: |             | Tmin=0.511 Tmax=0.754          |
| AbsCorr =                               | MULTI-SCAN  |                                |
| Data completeness=                      | 1.70/1.00   |                                |
| heta(max)=                              | 68.236      |                                |
| R(reflections)= 0.0261(2895)            |             | wR2(reflections)= 0.0656(2906) |
| S = 1.098                               |             | Npar= 198                      |

---

### X-ray Structure of **4l**

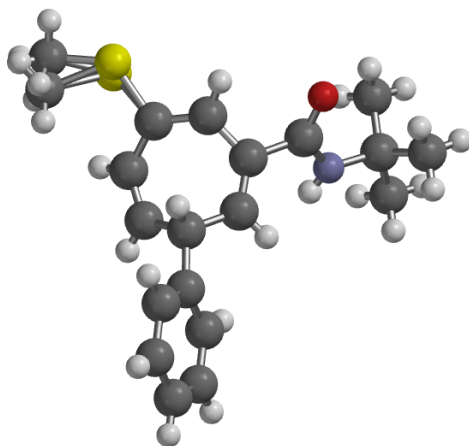

Colorless crystals of **4l** were grown from a hexanes/EtOAc solution by slow volatilization. CCDC: 2083307

|                 |                |                    |
|-----------------|----------------|--------------------|
| Bond precision: | C-C = 0.0022 Å | Wavelength=1.54178 |
| Cell:           | a=5.8465(1)    | b=16.2467(4)       |
|                 | alpha=90       | beta=90            |
| Temperature:    | 100 K          | gamma=90           |

|                                         | Calculated                      | Reported              |
|-----------------------------------------|---------------------------------|-----------------------|
| Volume                                  | 1678.81(6)                      | 1678.81(6)            |
| Space group                             | P 21 21 21                      | P 21 21 21            |
| Hall group                              | P 2ac 2ab                       | P 2ac 2ab             |
| Moiety formula                          | C19 H23 N O S                   | C19 H23 N O S         |
| Sum formula                             | C19 H23 N O S                   | C19 H23 N O S         |
| Mr                                      | 313.44                          | 313.44                |
| Dx,g cm <sup>-3</sup>                   | 1.240                           | 1.240                 |
| Z                                       | 4                               | 4                     |
| Mu (mm <sup>-1</sup> )                  | 1.708                           | 1.708                 |
| F000                                    | 672.0                           | 672.0                 |
| F000'                                   | 674.95                          | 674.95                |
| h,k,lmax                                | 7,19,21                         | 7,19,21               |
| Nref                                    | 3180 [1862]                     | 3179                  |
| Tmin,Tmax                               | 0.782,0.872                     | 0.284,0.754           |
| Tmin'                                   | 0.537                           |                       |
| Correction method= # Reported T Limits: |                                 | Tmin=0.284 Tmax=0.754 |
| AbsCorr =                               | MULTI-SCAN                      |                       |
| Data completeness=1.71/1.00             | Theta(max)= 70.060              |                       |
| R(reflections)= 0.0242( 3167)           | wR2(reflections)= 0.0624( 3179) |                       |
| S = 1.084                               | Npar= 227                       |                       |

---

### X-ray Structure of 11d



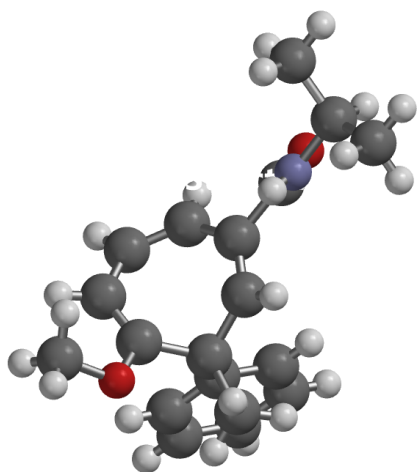

Colorless crystals of **11d** were grown from a hexanes/Acetone solution by slow volatilization.  
CCDC: 2083305

|                                     |                                                  |              |                                                  |
|-------------------------------------|--------------------------------------------------|--------------|--------------------------------------------------|
| Bond precision:                     | C-C = 0.0022 Å                                   |              | Wavelength=1.54178                               |
| Cell:                               | a=9.4746(3)                                      | b=12.0701(4) | c=30.0751(11)                                    |
|                                     | alpha=90                                         | beta=90      | gamma=90                                         |
| Temperature:                        | 100 K                                            |              |                                                  |
|                                     | Calculated                                       |              | Reported                                         |
| Volume                              | 3439.4(2)                                        |              | 3439.4(2)                                        |
| Space group                         | P 21 21 21                                       |              | P 21 21 21                                       |
| Hall group                          | P 2ac 2ab                                        |              | P 2ac 2ab                                        |
| Moiety formula                      | C <sub>19</sub> H <sub>23</sub> N O <sub>2</sub> |              | C <sub>19</sub> H <sub>23</sub> N O <sub>2</sub> |
| Sum formula                         | C <sub>19</sub> H <sub>23</sub> N O <sub>2</sub> |              | C <sub>19</sub> H <sub>23</sub> N O <sub>2</sub> |
| Mr                                  | 297.38                                           |              | 297.38                                           |
| D <sub>x</sub> , g cm <sup>-3</sup> | 1.149                                            |              | 1.149                                            |
| Z                                   | 8                                                |              | 8                                                |
| Mu (mm <sup>-1</sup> )              | 0.582                                            |              | 0.582                                            |
| F <sub>000</sub>                    | 1280.0                                           |              | 1280.0                                           |
| F <sub>000</sub> '                  | 1283.61                                          |              |                                                  |
| h,k,l <sub>max</sub>                | 11,14,36                                         |              | 11,14,36                                         |
| N <sub>ref</sub>                    | 6342[ 3593]                                      |              | 6333                                             |
| T <sub>min</sub> ,T <sub>max</sub>  | 0.876,0.933                                      |              | 0.434,0.753                                      |
| T <sub>min</sub> '                  | 0.711                                            |              |                                                  |

Correction method= # Reported T Limits:

Tmin=0.434 Tmax=0.753

AbsCorr = MULTI-SCAN

Data completeness=1.76/1.00 Theta(max)= 68.552

R(reflections)= 0.0266( 6290) wR2(reflections)= 0.0674( 6333)

S = 1.051 Npar= 452

---

### 1.16 Analytical data of enantioselective photochemical ring expansion

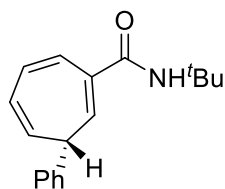

**(R)-N-(tert-butyl)-3-phenylcyclohepta-1,4,6-triene-1-carboxamide (4a):**

**General Procedure 6:** To a suspension of chiral amine (2.0 equiv) in dry THF (0.1 M) at  $-78\text{ }^{\circ}\text{C}$  was added *n*-butyl lithium (3.0 equiv, 2.5 M in hexanes) dropwise. The resulting mixture was allowed to warm to room temperature over 15 minutes, resulting in a clear yellow solution. This was then cooled down to  $-78\text{ }^{\circ}\text{C}$  and a solution of amide **2a** (100 mg, 0.37 mmol) in THF (0.5 mL) was added dropwise and the reaction mixture was stirred at 700 rpm and irradiated with a 40 W Kessil Tuna Blue lamp. The mixture was stirred at  $-78\text{ }^{\circ}\text{C}$  for 30 minutes, then the temperature of the Cryostat was set to  $-10\text{ }^{\circ}\text{C}$  and the reaction mixture was slowly allowed to warm. After a further 1 h, DMPU (3.0 equiv.) was added and further irradiation was continued for 2.5 h. The reaction was quenched with sat. aq.  $\text{NH}_4\text{Cl}$  (15 mL), and the aqueous layer was extracted with EtOAc ( $3 \times 10\text{ mL}$ ). The combined organic fractions were washed with brine, dried ( $\text{Na}_2\text{SO}_4$ ) and evaporated to yield a crude product, which was purified by flash chromatography, eluting with 10:90 EtOAc:Petrol ( $R_f = 0.4$ ), afforded the title compound (71 mg, 71%) as a colourless oil.  $R_f = 0.40$ ;  $[\alpha]_{\text{D}}^{23} = 16$  ( $c = 1.00$  in  $\text{CHCl}_3$ );  $\nu_{\text{max}}/\text{cm}^{-1}$ (neat): 3322, 2970, 1642, 1452, 1392, 1218, 1075, 753, 698;  $^1\text{H NMR}$  (400 MHz, Chloroform-*d*)  $\delta$  7.38 – 7.36 (m, 4H), 7.31 – 7.28 (m, 1H), 7.07 (d,  $J = 11.2\text{ Hz}$ , 1H), 6.83 (dd,  $J = 11.2, 5.6\text{ Hz}$ , 1H), 6.26 (ddd,  $J = 9.2, 5.6, 1.5\text{ Hz}$ , 1H), 5.93 (d,  $J = 6.1\text{ Hz}$ , 1H), 5.55 (s, 1H), 5.49 (ddq,  $J = 9.2, 5.4, 0.9\text{ Hz}$ , 1H), 2.72 (td,  $J = 5.9, 1.5\text{ Hz}$ , 1H), 1.37 (s, 9H).  $^{13}\text{C NMR}$  (101 MHz, Chloroform-*d*)  $\delta$  167.10, 142.91, 133.64, 132.32, 128.93, 128.19, 127.70, 127.06, 126.47, 125.32, 51.61, 44.65, 28.86. **HRMS** (ESI $^{+}$ ):  $m/z$  calcd for  $\text{C}_{18}\text{H}_{21}\text{NONa}$   $[\text{M}+\text{Na}]^{+}$  290.1515, found 290.1517. **HPLC**: *er* 3.798: 96.202; Chiral Regis Whelk O1,

Hexane:IPA = 85:15 flow = 1.0 mL/min,  $\lambda$  = 280 nm, tR = 20.10 mins (minor), and 25.99 mins (major).

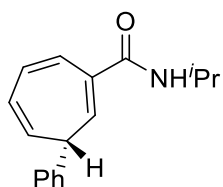

**(*R*)-*N*-isopropyl-3-phenylcyclohepta-1,4,6-triene-1-carboxamide (4a'):**

**General Procedure 6:** To a suspension of chiral amine (2.0 equiv) in dry THF (0.1 M) at  $-78\text{ }^{\circ}\text{C}$ , was added *n*-butyl lithium (3.0 equiv, 2.5 M in hexanes), dropwise. The resulting mixture was allowed to warm to room temperature over 15 minutes, resulting in a clear yellow solution. This was then cooled down to  $-78\text{ }^{\circ}\text{C}$  and a solution of amide **2a'** (100 mg, 0.39 mmol) in THF (0.5 mL) was added dropwise and the reaction mixture was stirred at 700 rpm and irradiated with a 40 W Kessil Tuna Blue lamp. The mixture was stirred at  $-78\text{ }^{\circ}\text{C}$  for 30 minutes before the temperature of the Cryostat was set to  $-10\text{ }^{\circ}\text{C}$  and the reaction mixture was slowly allowed to warm. After a further 1 h, DMPU (3.0 equiv.) was added and further irradiation was continued for 2.5 h. The reaction was quenched with sat. aq.  $\text{NH}_4\text{Cl}$  (15 mL), and the aqueous layer was extracted with EtOAc ( $3 \times 10\text{ mL}$ ). The combined organic fractions were washed with brine, dried ( $\text{Na}_2\text{SO}_4$ ) and evaporated to yield a crude product, which was purified by flash chromatography, eluting with 85:15 petrol-EtOAc ( $R_f = 0.40$ ), afforded the title compound (72 mg, 72%) as a pale-yellow oil.  $R_f = 0.40$ ;  $[\alpha]_D^{23} = 8$  ( $c = 1.00$  in  $\text{CHCl}_3$ );  $\nu_{\text{max}}/\text{cm}^{-1}$ (neat): 3295, 2976, 1632, 1531, 1447, 697;  $^1\text{H NMR}$  (400 MHz, Chloroform-*d*)  $\delta$  7.31 – 7.26 (m, 4H), 7.22 – 7.19 (m, 1H), 7.00 (d,  $J = 11.2$  Hz, 1H), 6.74 (dd,  $J = 11.2, 5.6$  Hz, 1H), 6.16 (ddd,  $J = 9.2, 5.6, 1.5$  Hz, 1H), 5.89 (d,  $J = 6.0$  Hz, 1H), 5.58 (d,  $J = 6.5$  Hz, 1H), 5.41 – 5.33 (m, 1H), 4.10 – 3.94 (m, 1H), 2.64 (td,  $J = 6.0, 1.4$  Hz, 1H), 1.07 (d,  $J = 1.4$  Hz, 3H), 1.05 (d,  $J = 1.3$  Hz, 3H).  $^{13}\text{C NMR}$  (101 MHz, Chloroform-*d*)  $\delta$  166.73, 142.78, 132.66, 132.30, 128.85, 128.43, 128.03, 127.61, 127.52, 126.98, 126.23, 125.28, 44.61, 41.83, 22.77, 22.75. **HRMS** (ESI+):  $m/z$  calcd for  $\text{C}_{17}\text{H}_{20}\text{NO}$   $[\text{M}+\text{H}]^+$  254.1539, found 254.1547; **HPLC**: *er* 42:58; CHIRALPAK<sup>®</sup> IA column, Hexane: PA = 98:02 flow = 1.0 mL/min,  $\lambda$  = 280 nm, tR = 18.22 mins (minor) and 24.32 mins (major) respectively.

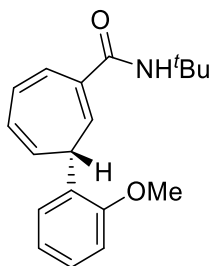

**(*R*)-*N*-(tert-butyl)-3-(2-methoxyphenyl)cyclohepta-1,4,6-triene-1-**

**carboxamide (4b): General Procedure 6:** To a suspension of chiral amine (2.0 equiv) in dry THF (0.1) at  $-78\text{ }^{\circ}\text{C}$  (Cryostat), was added *n*-butyl lithium (3.0 equiv, 2.5 M in hexanes), dropwise. The resulting mixture was allowed to warm to room temperature over 15 minutes, resulting in a clear yellow solution. This was then cooled down to  $-78\text{ }^{\circ}\text{C}$ , a solution of amide **2b** (100 mg, 0.33 mmol) in THF (0.5 mL) was added dropwise and the reaction mixture was stirred at 700 rpm and irradiated with a 40 W Kessil lamp. The mixture was stirred at  $-78\text{ }^{\circ}\text{C}$  for 30 minutes, then the temperature of the Cryostat was set to  $-10\text{ }^{\circ}\text{C}$  and the reaction mixture was slowly allowed to warm. After a further 1 h, DMPU (3.0 equiv.) was added and further irradiation was continued for 6.5 h. The reaction was quenched with sat. aq.  $\text{NH}_4\text{Cl}$  (15 mL), and the aqueous layer was extracted with EtOAc ( $3 \times 10\text{ mL}$ ). The combined organic fractions were washed with brine, dried ( $\text{Na}_2\text{SO}_4$ ) and evaporated to yield a crude product, which was purified by flash chromatography, eluting with 85:15 petrol-EtOAc ( $R_f = 0.35$ ), afforded the title compound (63 mg, 63%) as a colorless needles (**MP**:  $120\text{--}122\text{ }^{\circ}\text{C}$ ).  $R_f = 0.38$ ;  $[\alpha]_{\text{D}}^{23} = 16$  ( $c = 1.00$  in  $\text{CHCl}_3$ );  $\nu_{\text{max}}/\text{cm}^{-1}$ (neat): 3327, 2967, 1644, 1494, 1454, 1242, 1027, 751, 716;  $^1\text{H NMR}$  (400 MHz, Chloroform-*d*)  $\delta$  7.31 – 7.27 (m, 2H), 7.03 (d,  $J = 11.2\text{ Hz}$ , 1H), 6.97 (td,  $J = 7.5, 1.1\text{ Hz}$ , 1H), 6.94 – 6.90 (m, 1H), 6.82 – 6.75 (m, 1H), 6.21 (ddd,  $J = 9.2, 5.6, 1.5\text{ Hz}$ , 1H), 5.90 (d,  $J = 6.0\text{ Hz}$ , 1H), 5.56 (s, 1H), 5.49 – 5.41 (m, 1H), 3.79 (s, 3H), 3.07 (td,  $J = 5.8, 1.5\text{ Hz}$ , 1H), 1.36 (s, 9H).  $^{13}\text{C NMR}$  (101 MHz, Chloroform-*d*)  $\delta$  167.28, 157.43, 133.36, 132.08, 130.71, 129.18, 128.61, 128.27, 128.04, 127.93, 127.34, 126.80, 124.89, 120.89, 111.01, 55.45, 51.50, 40.01, 28.87. **HRMS** (ESI $^{+}$ ):  $m/z$  calcd for  $\text{C}_{19}\text{H}_{23}\text{NO}_2\text{Na}$   $[\text{M}+\text{Na}]^{+}$  320.1621, found 320.1622; **HPLC**: er 8:92; CHIRALPAK $^{\circledR}$  IA column, Hexane:IPA = 97:3 flow = 1.0 mL/min,  $\lambda = 280\text{ nm}$ ,  $t_R = 8.9\text{ mins}$  (minor) and 10.11 mins (major).

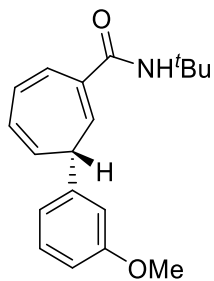

**(*R*)-*N*-(tert-butyl)-3-(3-methoxyphenyl)cyclohepta-1,4,6-triene-1-**

**carboxamide (4c): General Procedure 6:** To a suspension of chiral amine (2.0 equiv) in dry THF (0.1) at  $-78\text{ }^{\circ}\text{C}$  (Cryostat), was added *n*-butyl lithium (3.0 equiv, 2.5 M in hexanes), dropwise. The resulting mixture was allowed to warm to room temperature over 15 minutes, resulting in a clear yellow solution. This was then cooled down to  $-78\text{ }^{\circ}\text{C}$ , a solution of amide **2c** (100 mg, 0.33 mmol) in THF (0.5 mL) was added dropwise and the reaction mixture was stirred at 700 rpm and irradiated with a 40 W Kessil lamp. The mixture was stirred at  $-78\text{ }^{\circ}\text{C}$  for 30 minutes, then the temperature of the Cryostat was set to  $-10\text{ }^{\circ}\text{C}$  and the reaction mixture was slowly allowed to warm. After a further 1 h, DMPU (3.0 equiv.) was added and further irradiation was continued for 22.5 h. The reaction was quenched with sat. aq.  $\text{NH}_4\text{Cl}$  (15 mL), and the aqueous layer was extracted with EtOAc ( $3 \times 10\text{ mL}$ ). The combined organic fractions were washed with brine, dried ( $\text{Na}_2\text{SO}_4$ ) and evaporated to yield a crude product, which was purified by flash chromatography, eluting with 85:15 petrol-EtOAc ( $R_f = 0.35$ ), afforded the title compound (56 mg, 56%) as a colorless needles (**MP**:  $107\text{--}109\text{ }^{\circ}\text{C}$ ).  $R_f = 0.40$ ;  $[\alpha]_{\text{D}}^{24} = 20$  ( $c = 1.00$  in  $\text{CHCl}_3$ );  $\nu_{\text{max}}/\text{cm}^{-1}$ (neat): 3327, 2968, 1642, 1453, 1391, 1220, 1156, 1049, 752, 716, 699;  $^1\text{H NMR}$  (400 MHz, Chloroform-*d*)  $\delta$  7.32 – 7.27 (m, 1H), 7.08 (d,  $J = 11.2\text{ Hz}$ , 1H), 6.98 – 6.93 (m, 1H), 6.91 – 6.89 (m, 1H), 6.87 – 6.81 (m, 2H), 6.26 (ddd,  $J = 9.2, 5.6, 1.5\text{ Hz}$ , 1H), 5.93 (d,  $J = 5.3\text{ Hz}$ , 1H), 5.58 (s, 1H), 5.53 – 5.47 (m, 1H), 2.71 (td,  $J = 5.9, 1.4\text{ Hz}$ , 1H), 1.38 (s, 9H).  $^{13}\text{C NMR}$  (101 MHz, Chloroform-*d*)  $\delta$  167.11, 160.06, 144.56, 133.68, 132.30, 129.95, 128.24, 127.25, 126.35, 125.31, 119.99, 113.55, 112.33, 55.35, 51.60, 44.72, 28.86. **HRMS** (ESI $^{+}$ ):  $m/z$  calcd for  $\text{C}_{19}\text{H}_{23}\text{NO}_2\text{Na}$   $[\text{M}+\text{Na}]^{+}$  320.1621, found 320.1626; **HPLC**: er 9:91; CHIRALPAK $^{\text{®}}$  IA column, Hexane:IPA = 99:1 flow = 1.0 mL/min,  $\lambda = 280\text{ nm}$ ,  $t_R = 14.11\text{ mins}$  (minor) and 19.42 mins (major).

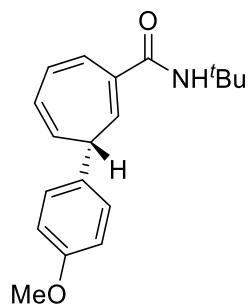

**(R)-N-(tert-butyl)-3-(4-methoxyphenyl)cyclohepta-1,4,6-triene-1-carboxamide (4d):**

To a suspension of chiral amine (2.0 equiv) in dry THF (0.1) at  $-78\text{ }^{\circ}\text{C}$  (Cryostat), was added *n*-butyl lithium (3.0 equiv, 2.5 M in hexanes), dropwise. The resulting mixture was allowed to warm to room temperature over 15 minutes, resulting in a clear yellow solution. This was then cooled down to  $-78\text{ }^{\circ}\text{C}$ , a solution of amide **2d** (100 mg, 0.33 mmol) in THF (0.5 mL) and 3.0 equiv DMPU were sequentially added dropwise. The mixture was stirred at  $-78\text{ }^{\circ}\text{C}$  for 30 minutes before being slowly warmed to room temperature over 5 hours. After 5h reaction mixture was re-cool to  $-10\text{ }^{\circ}\text{C}$  and placed under kessil LED. Irradiation was continued at  $-10\text{ }^{\circ}\text{C}$  for 10 h. The reaction was quenched with sat. aq.  $\text{NH}_4\text{Cl}$  (15 mL), and the aqueous layer was extracted with EtOAc ( $3 \times 10\text{ mL}$ ). The combined organic fractions were washed with brine, dried ( $\text{Na}_2\text{SO}_4$ ) and evaporated to yield a crude product, which was purified by flash chromatography, eluting with 85:15 petrol-EtOAc, afforded the title compound (30 mg, 30%) as a colorless needles (**MP**:  $99\text{--}101\text{ }^{\circ}\text{C}$ ).  $R_f = 0.40$ ;  $[\alpha]_D^{23.2} = 8$  ( $c = 1.00$  in  $\text{CHCl}_3$ );  $\nu_{\text{max}}/\text{cm}^{-1}$ (neat): 3295, 2971, 1633, 1512, 1392, 1247;  **$^1\text{H}$  NMR** (400 MHz, Chloroform-*d*)  $\delta$  7.29 – 7.27 (m, 2H), 7.07 (d,  $J = 11.2\text{ Hz}$ , 1H), 6.94 – 6.91 (m, 2H), 6.84 (dd,  $J = 11.4, 5.5\text{ Hz}$ , 1H), 6.25 (ddd,  $J = 9.2, 5.6, 1.5\text{ Hz}$ , 1H), 5.93 (d,  $J = 6.0\text{ Hz}$ , 1H), 5.54 (s, 1H), 5.52 – 5.45 (m, 1H), 3.83 (s, 3H), 2.71 – 2.66 (m, 1H), 1.38 (s, 9H).  **$^{13}\text{C}$  NMR** (101 MHz, Chloroform-*d*)  $\delta$  167.06, 158.59, 132.27, 128.82, 128.57, 128.11, 127.42, 127.16, 125.05, 114.21, 55.35, 51.51, 43.86, 28.79. **HRMS** (ESI $^{+}$ ):  $m/z$  calcd for  $\text{C}_{19}\text{H}_{23}\text{NO}_2\text{Na}$   $[\text{M}+\text{Na}]^{+}$  320.1621, found 320.1621; **HPLC**: er 23:77; Chiral Regis Whelk O1, Hexane:IPA = 80:20 flow = 1.0 mL/min,  $\lambda = 280\text{ nm}$ ,  $t_R = 31.285\text{ mins}$ (minor) and 40:568 mins (major).

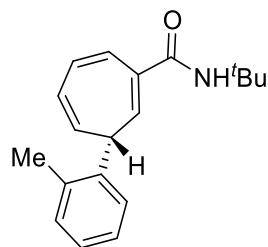

**(*R*)-*N*-(tert-butyl)-3-(*o*-tolyl)cyclohepta-1,4,6-triene-1-carboxamide**

**(4e): General Procedure 6:** To a suspension of chiral amine (2.0 equiv) in dry THF (0.1) at  $-78$  °C (Cryostat), was added *n*-butyl lithium (3.0 equiv, 2.5 M in hexanes), dropwise. The resulting mixture was allowed to warm to room temperature over 15 minutes, resulting in a clear yellow solution. This was then cooled down to  $-78$  °C, a solution of amide **2e** (100 mg, 0.35 mmol) in THF (0.5 mL) was added dropwise and the reaction mixture was stirred at 700 rpm and irradiated with a 40 W Kessil lamp. The mixture was stirred at  $-78$  °C for 30 minutes, then the temperature of the Cryostat was set to  $-10$  °C and the reaction mixture was slowly allowed to warm. After a further 1 h, DMPU (3.0 equiv.) was added and further irradiation was continued for 3.5 h. The reaction was quenched with sat. aq.  $\text{NH}_4\text{Cl}$  (15 mL), and the aqueous layer was extracted with EtOAc ( $3 \times 10$  mL). The combined organic fractions were washed with brine, dried ( $\text{Na}_2\text{SO}_4$ ) and evaporated to yield a crude product, which was purified by flash chromatography, eluting with 90:10 petrol-EtOAc ( $R_f = 0.35$ ), afforded the title compound (85 mg, 85%) as a pale-yellow oil.  $R_f = 0.40$ ;  $[\alpha]_D^{23.2} = 20$  ( $c = 1.00$  in  $\text{CHCl}_3$ );  $\nu_{\text{max}}/\text{cm}^{-1}$ (neat): 3322, 2970, 1640, 1525, 1452, 1392, 1219, 1065, 752;  $^1\text{H NMR}$  (400 MHz, Chloroform-*d*)  $\delta$  7.47 (d,  $J = 7.4$  Hz, 1H), 7.31 – 7.25 (m, 1H), 7.20 – 7.17 (m, 2H), 7.06 (d,  $J = 11.1$  Hz, 1H), 6.81 (dd,  $J = 11.3, 5.5$  Hz, 1H), 6.27 (ddd,  $J = 9.1, 5.7, 1.5$  Hz, 1H), 5.86 – 5.78 (m, 1H), 5.54 (s, 1H), 5.42 – 5.32 (m, 1H), 2.90 (td,  $J = 5.8, 1.5$  Hz, 1H), 2.19 (s, 3H), 1.37 (s, 9H).  $^{13}\text{C NMR}$  (101 MHz, Chloroform-*d*)  $\delta$  167.13, 140.90, 136.34, 133.88, 131.95, 130.70, 128.05, 126.86, 126.79, 126.61, 125.61, 125.36, 124.57, 51.59, 40.57, 28.86, 19.64; **HRMS** (ESI $^{+}$ ):  $m/z$  calcd for  $\text{C}_{19}\text{H}_{23}\text{NONa}$   $[\text{M}+\text{Na}]^{+}$  304.1675, found 304.1672; **HPLC**: *er* 4:96; Chiral Regis Whelk O1, Hexane:IPA = 90:10, flow = 1.0 mL/min,  $\lambda = 280$  nm,  $t_R = 30.722$  mins(minor) and 44.404 mins (major).

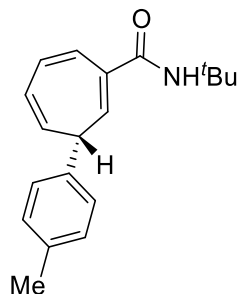

**(*R*)-*N*-(tert-butyl)-3-(*p*-tolyl)cyclohepta-1,4,6-triene-1-carboxamide (**4f**):**

**General Procedure 6:** To a suspension of chiral amine (2.0 equiv) in dry THF (0.1) at  $-78\text{ }^{\circ}\text{C}$  (Cryostat), was added *n*-butyl lithium (3.0 equiv, 2.5 M in hexanes), dropwise. The resulting mixture was allowed to warm to room temperature over 15 minutes, resulting in a clear yellow solution. This was then cooled down to  $-78\text{ }^{\circ}\text{C}$ , a solution of amide **2f** (100 mg, 0.35 mmol) in THF (0.5 mL) was added dropwise and the reaction mixture was stirred at 700 rpm and irradiated with a 40 W Kessil lamp. The mixture was stirred at  $-78\text{ }^{\circ}\text{C}$  for 30 minutes, then the temperature of the Cryostat was set to  $-10\text{ }^{\circ}\text{C}$  and the reaction mixture was slowly allowed to warm. After a further 1 h, DMPU (3.0 equiv.) was added and further irradiation was continued for 8.5 h. The reaction was quenched with sat. aq.  $\text{NH}_4\text{Cl}$  (15 mL), and the aqueous layer was extracted with EtOAc ( $3 \times 10\text{ mL}$ ). The combined organic fractions were washed with brine, dried ( $\text{Na}_2\text{SO}_4$ ) and evaporated to yield a crude product, which was purified by flash chromatography, eluting with 90:10 petrol-EtOAc ( $R_f = 0.35$ ), afforded the title compound (40 mg, 40%) as a pale-yellow oil.  $R_f = 0.40$ ;  $[\alpha]_D^{23.2} = 12$  ( $c = 1.00$  in  $\text{CHCl}_3$ );  $\nu_{\text{max}}/\text{cm}^{-1}(\text{neat})$ : 3327, 2959, 1644, 1512, 1451, 1363, 1217, 750, 697;  $^1\text{H NMR}$  (500 MHz, Chloroform-*d*)  $\delta$  7.30 – 7.26 (m, 2H), 7.23 (t,  $J = 6.2\text{ Hz}$ , 2H), 7.11 (d,  $J = 11.2\text{ Hz}$ , 1H), 6.87 (dd,  $J = 11.2, 5.6\text{ Hz}$ , 1H), 6.31 – 6.25 (m, 1H), 5.94 (d,  $J = 6.0\text{ Hz}$ , 1H), 5.57 (s, 1H), 5.52 (dd,  $J = 9.1, 5.4\text{ Hz}$ , 1H), 2.73 (t,  $J = 5.5\text{ Hz}$ , 1H), 2.39 (s, 3H), 1.40 (s, 9H).  $^{13}\text{C NMR}$  (126 MHz Chloroform-*d*)  $\delta$  167.09, 139.84, 136.58, 133.51, 132.24, 129.51, 128.16, 127.75, 126.86, 125.13, 51.51, 44.24, 28.78, 21.07. **HRMS** (ESI $^{+}$ ):  $m/z$  calcd for  $\text{C}_{19}\text{H}_{23}\text{NONa}$   $[\text{M}+\text{Na}]^{+}$  304.1675, found 304.1671; **HPLC**: *er* 4:96; **CHIRALPAK** $^{\text{®}}$  IA column, Hexane:IPA = 99:01, flow = 1.0 mL/min,  $\lambda = 280\text{ nm}$ ,  $t_R = 10.271\text{ mins}$ (minor) and 12.86 mins (major).



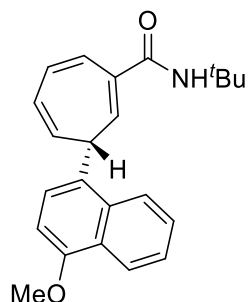

**(R)-N-(tert-butyl)-3-(4-methoxynaphthalen-1-yl)cyclohepta-1,4,6-triene-**

**1-carboxamide (4g): General Procedure 6:** To a suspension of chiral amine (2.0 equiv) in dry THF (0.1) at  $-78\text{ }^{\circ}\text{C}$  (Cryostat), was added n-butyl lithium (3.0 equiv, 2.5 M in hexanes), dropwise. The resulting mixture was allowed to warm to room temperature over 15 minutes, resulting in a clear yellow solution. This was then cooled down to  $-78\text{ }^{\circ}\text{C}$ , a solution of amide **2g** (100 mg, 0.28 mmol) in THF (0.5 mL) was added dropwise and the reaction mixture was stirred at 700 rpm and irradiated with a 40 W Kessil lamp. The mixture was stirred at  $-78\text{ }^{\circ}\text{C}$  for 30 minutes, then the temperature of the Cryostat was set to  $-10\text{ }^{\circ}\text{C}$  and the reaction mixture was slowly allowed to warm. After a further 1 h, DMPU (3.0 equiv.) was added and further irradiation was continued for 14.5 h. The reaction was quenched with sat. aq.  $\text{NH}_4\text{Cl}$  (15 mL), and the aqueous layer was extracted with EtOAc ( $3 \times 10\text{ mL}$ ). The combined organic fractions were washed with brine, dried ( $\text{Na}_2\text{SO}_4$ ) and evaporated to yield a crude product, which was purified by flash chromatography, eluting with 80:20 petrol-EtOAc ( $R_f = 0.35$ ), afforded the title compound (40 mg, 40%) as a yellow oil.  $R_f = 0.40$ ;  $[\alpha]_D^{22.6} = 12$  ( $c = 1.00$  in  $\text{CHCl}_3$ );  $\nu_{\text{max}}/\text{cm}^{-1}$ (neat): 3327, 2970, 1649, 1586, 1518, 1392, 1225, 1055, 759;  $^1\text{H NMR}$  (400 MHz, Chloroform- $d$ )  $\delta$  8.37 – 8.31 (m, 1H), 7.89 – 7.81 (m, 1H), 7.52 – 7.45 (m, 3H), 7.11 (d,  $J = 11.0\text{ Hz}$ , 1H), 6.88 – 6.83 (m, 1H), 6.82 (d,  $J = 8.1\text{ Hz}$ , 1H), 6.30 (ddd,  $J = 9.0, 5.7, 1.4\text{ Hz}$ , 1H), 5.95 (d,  $J = 6.0\text{ Hz}$ , 1H), 5.60 – 5.47 (m, 2H), 4.01 (s, 3H), 3.28 (t,  $J = 5.7\text{ Hz}$ , 1H), 1.36 (s, 9H).  $^{13}\text{C NMR}$  (101 MHz, Chloroform- $d$ )  $\delta$  167.19, 154.98, 133.63, 132.39, 131.90, 129.84, 128.20, 126.62, 126.40, 125.42, 125.18, 124.72, 124.02, 123.58, 122.97, 103.29, 55.64, 51.59, 40.63, 28.86. **HRMS** (ESI $^{+}$ ):  $m/z$  calcd for  $\text{C}_{23}\text{H}_{25}\text{NO}_2\text{Na}$   $[\text{M}+\text{Na}]^{+}$  370.1777, found 370.1788; **HPLC**: er 6:94 Chiral Regis Whelk O1, Hexane:IPA = 70:30 flow = 1.0 mL/min,  $\lambda = 280\text{ nm}$ ,  $t_R = 33.68$  (minor), and 41.3 (major).

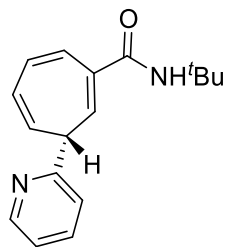

**(*R*)-*N*-(tert-butyl)-3-(pyridin-2-yl)cyclohepta-1,4,6-triene-1-carboxamide**

**(4h): General Procedure 6:** To a suspension of chiral (*R*)-amine (2.0 equiv) in dry THF (0.1) at  $-78\text{ }^{\circ}\text{C}$  (Cryostat), was added *n*-butyl lithium (3.0 equiv, 2.5 M in hexanes), dropwise. The resulting mixture was allowed to warm to room temperature over 15 minutes, resulting in a clear yellow solution. This was then cooled down to  $-78\text{ }^{\circ}\text{C}$ , a solution of amide **2h** (100 mg, 0.28 mmol) in THF (0.5 mL) was added dropwise and the reaction mixture was stirred at 700 rpm and irradiated with a 40 W Kessil lamp. The mixture was stirred at  $-78\text{ }^{\circ}\text{C}$  for 30 minutes, then the temperature of the Cryostat was set to  $-10\text{ }^{\circ}\text{C}$  and the reaction mixture was slowly allowed to warm. After a further 1 h, DMPU (3.0 equiv.) was added and further irradiation was continued for 5.5 h. The reaction was quenched with sat. aq.  $\text{NH}_4\text{Cl}$  (15 mL), and the aqueous layer was extracted with EtOAc ( $3 \times 10\text{ mL}$ ). The combined organic fractions were washed with brine, dried ( $\text{Na}_2\text{SO}_4$ ) and evaporated to yield a crude product, which was purified by flash chromatography, eluting with 80:20 petrol-EtOAc ( $R_f = 0.35$ ), afforded the title compound (60 mg, 60%) as a yellow oil.  $R_f = 0.35$   $[\alpha]_D^{23.2} = 12$  ( $c = 1.00$  in  $\text{CHCl}_3$ );  $\nu_{\text{max}}/\text{cm}^{-1}$ (neat): 3313, 2970, 1650, 1543, 1363, 1223, 1052, 749;  $^1\text{H NMR}$  (400 MHz, Chloroform-*d*)  $\delta$  8.59 (ddd,  $J = 4.8, 1.8, 0.9\text{ Hz}$ , 1H), 7.65 (ddd,  $J = 7.5, 1.9\text{ Hz}$ , 1H), 7.51 (dt,  $J = 8.0, 1.0\text{ Hz}$ , 1H), 7.25 – 7.21 (m, 1H), 7.16 (ddd,  $J = 7.5, 4.8, 1.1\text{ Hz}$ , 1H), 6.73 (dd,  $J = 10.4, 6.3\text{ Hz}$ , 1H), 6.32 (dd,  $J = 8.4, 6.3\text{ Hz}$ , 1H), 5.59 – 5.51 (m, 1H), 5.48 (s, 1H), 5.01 (ddt,  $J = 7.8, 5.3, 2.5\text{ Hz}$ , 1H), 2.11 – 2.06 (m, 1H), 1.39 (s, 9H).  $^{13}\text{C NMR}$  (101 MHz, Chloroform-*d*)  $\delta$  171.86, 157.47, 149.29, 136.84, 136.57, 130.12, 128.80, 126.57, 122.00, 121.08, 103.02, 101.69, 51.62, 41.91, 28.96. **HRMS** (ESI $^{+}$ ):  $m/z$  calcd for  $\text{C}_{17}\text{H}_{20}\text{N}_2\text{ONa}$   $[\text{M}+\text{Na}]^{+}$  291.1467, found 291.1472; **HPLC**: er 39:61 Chiral Regis Whelk O1, Hexane:IPA = 85:15 flow = 1.0 mL/min,  $\lambda = 280\text{ nm}$ ,  $t_R = 20.987\text{ mins}$ (minor) and 22.505 mins (major).

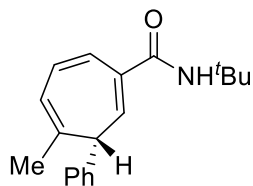

**(S)-N-(tert-butyl)-4-methyl-3-phenylcyclohepta-1,4,6-triene-1-**

**carboxamide (4i): General Procedure 6:** To a suspension of chiral amine (2.0 equiv) in dry THF (0.1) at  $-78\text{ }^{\circ}\text{C}$  (Cryostat), was added n-butyl lithium (3.0 equiv, 2.5 M in hexanes), dropwise. The resulting mixture was allowed to warm to room temperature over 15 minutes, resulting in a clear yellow solution. This was then cooling down to  $-78\text{ }^{\circ}\text{C}$ , a solution of amide **4i** (100 mg, 0.35 mmol) in THF (0.5 mL) was added dropwise and the reaction mixture was stirred at 700 rpm and irradiated with a 40 W Kessil lamp. The mixture was stirred at  $-78\text{ }^{\circ}\text{C}$  for 30 minutes, then the temperature of the Cryostat was set to  $-10\text{ }^{\circ}\text{C}$  and the reaction mixture was slowly allowed to warm. After a further 1 h, DMPU (3.0 equiv.) was added and further irradiation was continued for 4.5 h. The reaction was quenched with sat. aq.  $\text{NH}_4\text{Cl}$  (15 mL), and the aqueous layer was extracted with EtOAc ( $3 \times 10\text{ mL}$ ). The combined organic fractions were washed with brine, dried ( $\text{Na}_2\text{SO}_4$ ) and evaporated to yield a crude product, which was purified by flash chromatography, eluting with 90:10 petrol-EtOAc ( $R_f = 0.40$ ), afforded the title compound (68 mg, 68%) as a colorless oil.  $R_f = 0.40$ ;  $[\alpha]_D^{23} = 20$  ( $c = 1.00$  in  $\text{CHCl}_3$ );  $\nu_{\text{max}}/\text{cm}^{-1}$ (neat): 3354, 2971, 1644, 1532, 1451, 1393, 1055;  $^1\text{H NMR}$  (400 MHz, Chloroform- $d$ )  $\delta$  7.27 – 7.18 (m, 3H), 7.17 – 7.14 (m, 2H), 6.70 (d,  $J = 11.2\text{ Hz}$ , 1H), 6.55 (dd,  $J = 11.2, 5.7\text{ Hz}$ , 1H), 6.27 (d,  $J = 7.4\text{ Hz}$ , 1H), 6.00 (d,  $J = 6.6\text{ Hz}$ , 1H), 5.52 (s, 1H), 3.04 (d,  $J = 7.4\text{ Hz}$ , 1H), 1.61 (s, 3H), 1.28 (s, 9H).  $^{13}\text{C NMR}$  (101 MHz, Chloroform- $d$ )  $\delta$  167.02, 139.94, 137.31, 133.88, 132.12, 128.67, 128.28, 127.39, 126.77, 125.56, 122.28, 51.48, 48.29, 28.81, 22.11. **HRMS** (ESI $^{+}$ ):  $m/z$  calcd for  $\text{C}_{19}\text{H}_{23}\text{NONa}$   $[\text{M}+\text{Na}]^{+}$  304.1672, found 304.1674; **HPLC**: *er* 5.3: 94:6; Chiral Regis Whelk O1, Hexane:IPA = 70:30 flow = 1.0 mL/min,  $\lambda = 280\text{ nm}$ ,  $t_R = 21.53\text{ mins}$  (minor) and 29.20 mins (major) respectively.

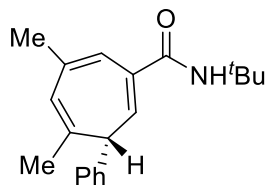

**(S)-N-(tert-butyl)-4,6-dimethyl-3-phenylcyclohepta-1,4,6-triene-1-**

**carboxamide (4j): General Procedure 6:** To a suspension of chiral amine (2.0 equiv) in dry THF (0.1) at  $-78\text{ }^{\circ}\text{C}$  (Cryostat), was added n-butyl lithium (3.0 equiv, 2.5 M in hexanes), dropwise. The resulting mixture was allowed to warm to room temperature over 15 minutes, resulting in a clear

yellow solution. This was then cooled down to  $-78\text{ }^{\circ}\text{C}$ , a solution of amide **2j** (100 mg, 0.33 mmol) in THF (0.5 mL) was added dropwise and the reaction mixture was stirred at 700 rpm and irradiated with a 40 W Kessil lamp. The mixture was stirred at  $-78\text{ }^{\circ}\text{C}$  for 30 minutes, then the temperature of the Cryostat was set to  $-5\text{ }^{\circ}\text{C}$  and the reaction mixture was slowly allowed to warm. After a further 1 h, DMPU (3.0 equiv.) was added and further irradiation was continued for 8.5 h. The reaction was quenched with sat. aq.  $\text{NH}_4\text{Cl}$  (15 mL), and the aqueous layer was extracted with EtOAc ( $3 \times 10\text{ mL}$ ). The combined organic fractions were washed with brine, dried ( $\text{Na}_2\text{SO}_4$ ) and evaporated to yield a crude product, which was purified by flash chromatography, eluting with 90:10 petrol-EtOAc ( $R_f = 0.40$ ), afforded the title compound (50 mg, 50%) as a colorless oil.  $R_f = 0.39$ ;  $[\alpha]_D^{22.8} = 16$  ( $c = 1.00$  in  $\text{CHCl}_3$ );  $\nu_{\text{max}}/\text{cm}^{-1}$ (neat): 3320, 2971, 1662, 1529, 1455, 1398, 1065;  $^1\text{H NMR}$  (400 MHz, Chloroform- $d$ )  $\delta$  7.29 – 7.17 (m, 5H), 6.53 (s, 1H), 6.25 (d,  $J = 7.2\text{ Hz}$ , 1H), 5.87 (s, 1H), 5.55 (s, 1H), 3.13 (d,  $J = 7.2\text{ Hz}$ , 1H), 2.01 (s, 3H), 1.61 (s, 3H), 1.32 (s, 9H).  $^{13}\text{C NMR}$  (101 MHz,  $\text{CDCl}_3$ )  $\delta$  167.46, 141.46, 140.22, 136.06, 134.16, 128.66, 128.26, 126.69, 126.09, 125.40, 122.98, 51.41, 48.19, 28.82, 24.69, 21.95. **HRMS** (ESI $^{+}$ ):  $m/z$  calcd for  $\text{C}_{20}\text{H}_{25}\text{NONa}$   $[\text{M}+\text{Na}]^{+}$  318.1834, found 318.1831; **HPLC**: *er* 29:71; Chiral Regis Whelk O1, Hexane:IPA = 70:30 flow = 1.0 mL/min,  $\lambda = 280\text{ nm}$ ,  $t_R = 10.41\text{ mins}$  (minor) and 11.99 mins (major).

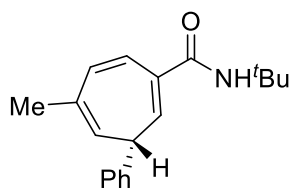

**(R)-N-(tert-butyl)-5-methyl-3-phenylcyclohepta-1,4,6-triene-1-carboxamide (4k):**

**Condition 1: General Procedure 6:** To a suspension of chiral amine (2.0 equiv) in dry THF (0.1) at  $-78\text{ }^{\circ}\text{C}$  (Cryostat), was added *n*-butyl lithium (3.0 equiv, 2.5 M in hexanes), dropwise. The resulting mixture was allowed to warm to room temperature over 15 minutes, resulting in a clear yellow solution. This was then cooled down to  $-78\text{ }^{\circ}\text{C}$ , a solution of amide **2k** (100 mg, 0.35 mmol) in THF (0.5 mL) was added dropwise and the reaction mixture was stirred at 700 rpm and irradiated with a 40 W Kessil lamp. The mixture was stirred at  $-78\text{ }^{\circ}\text{C}$  for 30 minutes, then the temperature of the Cryostat was set to  $-10\text{ }^{\circ}\text{C}$  and the reaction mixture was slowly allowed to warm. After a further 1 h, DMPU (3.0 equiv.) was added and further irradiation was continued for 8.5 h. The reaction was quenched with sat. aq.  $\text{NH}_4\text{Cl}$  (15 mL), and the aqueous layer was extracted with

EtOAc (3 × 10 mL). The combined organic fractions were washed with brine, dried (Na<sub>2</sub>SO<sub>4</sub>) and evaporated to yield a crude product, which was purified by flash chromatography, eluting with 9:1 petrol-EtOAc (R<sub>f</sub> = 0.40), afforded the title compound (84 mg, 84%) as a colorless oil. **HPLC**: Chiral Regis Whelk O1, eluting with hexane-IPA (70:30), showed it to consist of a 20:80 mixture of two enantiomers with retention times 9.88 mins (minor) and 16.17 min (major) respectively.

**Condition 2: General Procedure 6:** To a suspension of chiral amine (2.0 equiv) in dry THF (0.1) at -78 °C (Cryostat), was added n-butyl lithium (3.0 equiv, 2.5 M in hexanes), dropwise. The resulting mixture was allowed to warm to room temperature over 15 minutes, resulting in a clear yellow solution. This was then cooled down to -78 °C, a solution of amide **2k** (100 mg, 0.35 mmol) in THF (0.5 mL) was added dropwise and the reaction mixture was stirred at 700 rpm and irradiated with a 40 W Kessil lamp. The mixture was stirred at -78 °C for 30 minutes, then the temperature of the Cryostat was set to -20 °C and the reaction mixture was slowly allowed to warm. After a further 1 h, DMPU (3.0 equiv.) was added and further irradiation was continued for 14.5 h. The reaction was quenched with sat. aq. NH<sub>4</sub>Cl (15 mL), and the aqueous layer was extracted with EtOAc (3 × 10 mL). The combined organic fractions were washed with brine, dried (Na<sub>2</sub>SO<sub>4</sub>) and evaporated to yield a crude product, which was purified by flash chromatography, eluting with 90:10 petrol-EtOAc (R<sub>f</sub> = 0.40), afforded the title compound (86 mg, 86%) as a colorless needles (**MP**: 97-99 °C). *R<sub>f</sub>* = 0.40; [α]<sub>D</sub><sup>22.5</sup> = 48 (c = 1.00 in CHCl<sub>3</sub>); ν<sub>max</sub>/cm<sup>-1</sup>(neat): 3327, 2967, 1641, 1529, 1451, 1218, 753, 699; <sup>1</sup>H NMR (400 MHz, Chloroform-*d*) δ 7.38 – 7.32 (m, 2H), 7.29 (dt, *J* = 7.7, 1.7 Hz, 3H), 7.27 – 7.23 (m, 1H), 6.90 (d, *J* = 10.7 Hz, 1H), 6.58 (d, *J* = 10.7 Hz, 1H), 5.58 (s, 1H), 5.52 (dt, *J* = 5.8, 1.3 Hz, 1H), 4.81 – 4.74 (m, 1H), 2.52 (t, *J* = 5.5 Hz, 1H), 1.94 (s, 3H), 1.37 (s, 9H). <sup>13</sup>C NMR (101 MHz, Chloroform-*d*) δ 167.01, 143.20, 134.79, 132.66, 132.48, 128.81, 127.40, 126.76, 114.33, 110.58, 51.51, 41.40, 28.88, 21.56. **HRMS** (ESI<sup>+</sup>): *m/z* calcd for C<sub>19</sub>H<sub>23</sub>NONa [M+Na]<sup>+</sup> 304.1677, found 304.1674; **HPLC**: *er* 12:88; Chiral Regis Whelk O1, Hexane:IPA = 70:30 flow = 1.0 mL/min, λ = 280 nm, t<sub>R</sub> = 10.41 mins (minor) and 16.29 mins (major).

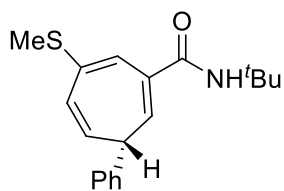

**(*R*)-*N*-(tert-butyl)-6-(methylthio)-3-phenylcyclohepta-1,4,6-triene-1-**

**carboxamide (4l): General Procedure 6:** To a suspension of chiral amine (2.0 equiv) in dry THF

(0.1) at  $-78\text{ }^{\circ}\text{C}$  (Cryostat), was added n-butyl lithium (3.0 equiv, 2.5 M in hexanes), dropwise. The resulting mixture was allowed to warm to room temperature over 15 minutes, resulting in a clear yellow solution. This was then cooled down to  $-78\text{ }^{\circ}\text{C}$ , a solution of amide **2l** (100 mg, 0.31 mmol) in THF (0.5 mL) was added dropwise and the reaction mixture was stirred at 700 rpm and irradiated with a 40 W Kessil lamp. The mixture was stirred at  $-78\text{ }^{\circ}\text{C}$  for 30 minutes, then the temperature of the Cryostat was set to  $-10\text{ }^{\circ}\text{C}$  and the reaction mixture was slowly allowed to warm. After a further 1 h, DMPU (3.0 equiv.) was added and further irradiation was continued for 4.5 h. The reaction was quenched with sat. aq.  $\text{NH}_4\text{Cl}$  (15 mL), and the aqueous layer was extracted with EtOAc ( $3 \times 10\text{ mL}$ ). The combined organic fractions were washed with brine, dried ( $\text{Na}_2\text{SO}_4$ ) and evaporated to yield a crude product, which was purified by flash chromatography, eluting with 90:10 petrol-EtOAc ( $R_f = 0.35$ ), afforded the title compound (30 mg, 30%) as a yellow needle (**MP**:  $110\text{--}112\text{ }^{\circ}\text{C}$ ).  $R_f = 0.42$ ;  $[\alpha]_D^{23.2} = 16$  ( $c = 1.00$  in  $\text{CHCl}_3$ );  $\nu_{\text{max}}/\text{cm}^{-1}$ (neat): 3322, 2962, 1638, 1523, 752, 700;  $^1\text{H NMR}$  (400 MHz, Chloroform- $d$ )  $\delta$  7.42 – 7.34 (m, 4H), 7.33 – 7.28 (m, 1H), 6.92 (s, 1H), 6.19 (dt,  $J = 9.5, 1.4\text{ Hz}$ , 1H), 5.90 (d,  $J = 5.8\text{ Hz}$ , 1H), 5.61 (ddt,  $J = 9.6, 5.9, 0.7\text{ Hz}$ , 1H), 5.54 (s, 1H), 2.98 (td,  $J = 5.8, 1.4\text{ Hz}$ , 1H), 2.43 (s, 3H), 1.38 (s, 9H).  $^{13}\text{C NMR}$  (101 MHz, Chloroform- $d$ )  $\delta$  167.05, 142.95, 142.47, 133.88, 128.97, 128.52, 127.68, 127.53, 127.15, 125.75, 121.77, 100.01, 51.65, 44.84, 28.86, 15.88. **HRMS** (ESI $^{+}$ ):  $m/z$  calcd for  $\text{C}_{19}\text{H}_{23}\text{NOSNa}$   $[\text{M}+\text{Na}]^{+}$  336.1396, found 336.1397; **HPLC**: er 1:99; CHIRALPAK $^{\text{®}}$  IA column, Hexane:IPA = 99:05, flow = 1.0 mL/min,  $\lambda = 280\text{ nm}$ ,  $t_R = 7.68\text{ mins}$ (minor) and 8.982 mins (major).

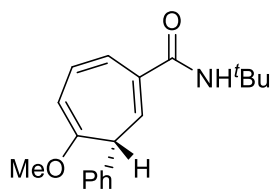

**(R)-N-(tert-butyl)-4-methoxy-3-phenylcyclohepta-1,4,6-triene-1-carboxamide (4m):** To a suspension of chiral amine (2.0 equiv) in dry THF (0.1) at  $-78\text{ }^{\circ}\text{C}$  (Cryostat), was added n-butyl lithium (3.0 equiv, 2.5 M in hexanes), dropwise. The resulting mixture was allowed to warm to room temperature over 15 minutes, resulting in a clear yellow solution. This was then cooled down to  $-78\text{ }^{\circ}\text{C}$ , a solution of amide **2m** (100 mg, 0.33 mmol) in THF (0.5 mL) and 3.0 equiv DMPU were sequentially added dropwise. The mixture was stirred at  $-78\text{ }^{\circ}\text{C}$  for 30 minutes before being slowly warmed to room temperature over 5 hours. After 5h reaction mixture was re-cool to  $-10\text{ }^{\circ}\text{C}$  and placed under kessil LED. Irradiation was continued at  $-10\text{ }^{\circ}\text{C}$  for 4 h. The reaction was quenched with sat. aq.  $\text{NH}_4\text{Cl}$  (15 mL), and the aqueous layer

was extracted with EtOAc ( $3 \times 10$  mL). The combined organic fractions were washed with brine, dried ( $\text{Na}_2\text{SO}_4$ ) and evaporated to yield a crude product, which was purified by flash chromatography, eluting with 85:15 petrol-EtOAc, afforded the title compound (65 mg, 65%) as a colorless needles (**MP**: 123-125 °C);  $R_f = 0.40$ ;  $[\alpha]_D^{22.8} = 8$  ( $c = 1.00$  in  $\text{CHCl}_3$ );  $\nu_{\text{max}}/\text{cm}^{-1}$ (neat): 3322, 2969, 1649, 1532, 1410, 1229, 700;  $^1\text{H NMR}$  (400 MHz, Chloroform- $d$ )  $\delta$  7.23 – 7.12 (m, 6H), 6.48 – 6.43 (m, 2H), 6.17 (d,  $J = 8.1$  Hz, 1H), 5.57 (s, 1H), 5.41 (dd,  $J = 4.5, 2.5$  Hz, 1H), 3.60 (d,  $J = 8.1$  Hz, 1H), 3.56 (s, 3H), 1.32 (s, 9H).  $^{13}\text{C NMR}$  (101 MHz,  $\text{CDCl}_3$ )  $\delta$  167.25, 155.14, 137.97, 135.57, 130.06, 128.50, 127.89, 126.75, 125.53, 121.08, 97.05, 56.65, 51.46, 47.81, 28.81. **HRMS** (ESI+):  $m/z$  calcd for  $\text{C}_{19}\text{H}_{23}\text{NO}_2\text{Na}$   $[\text{M}+\text{Na}]^+$  320.1621, found 320.1633; **HPLC**: er 39:61; CHIRALPAK® IA column, Hexane:IPA = 90:10 flow = 1.0 mL/min,  $\lambda = 280$  nm,  $t_R = 6.025$  mins (minor) and 7.58 mins (major).

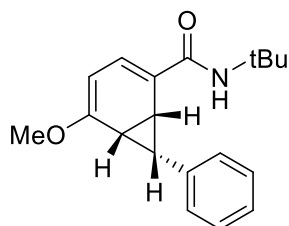

(1*R*,6*S*,7*S*)-*N*-(tert-butyl)-5-methoxy-7-phenylbicyclo[4.1.0]hepta-2,4-

**diene-2-carboxamide (5n): General Procedure 6:** To a suspension of chiral amine (2.0 equiv) in dry THF (0.1) at  $-78$  °C (Cryostat), was added *n*-butyl lithium (3.0 equiv, 2.5 M in hexanes), dropwise. The resulting mixture was allowed to warm to room temperature over 15 minutes, resulting in a clear yellow solution. This was then cooled down to  $-78$  °C, a solution of amide **2n** (100 mg, 0.33 mmol) in THF (0.5 mL) was added dropwise and the reaction mixture was stirred at 700 rpm and irradiated with a 40 W Kessil lamp. The mixture was stirred at  $-78$  °C for 30 minutes, then the temperature of the Cryostat was set to  $-10$  °C and the reaction mixture was slowly allowed to warm. After a further 1 h, DMPU (3.0 equiv.) was added and further irradiation was continued for 4.5 h. Saturated aq.  $\text{NH}_4\text{Cl}$  was added, the layers separated, and the aqueous layer was extracted with ethyl acetate (10 x 3). The combined organic fractions were washed with brine, dried ( $\text{Na}_2\text{SO}_4$ ) and evaporated to yield a crude product, which was purified by flash chromatography, eluting with 85:15 petrol-EtOAc ( $R_f = 0.35$ ), afforded the title compound (78 mg, 78%) as a yellow oil.  $R_f = 0.40$ ;  $[\alpha]_D^{22} = 41$  ( $c = 1.00$  in  $\text{CHCl}_3$ );  $\nu_{\text{max}}/\text{cm}^{-1}$ (neat): 3327, 2969, 1646, 1553, 1452, 1231, 749, 697;  $^1\text{H NMR}$  (400 MHz, Chloroform- $d$ )  $\delta$  7.20 – 7.11 (m, 2H), 7.11 – 7.03 (m, 1H), 7.02 – 6.94 (m, 2H), 6.61 (dd,  $J = 8.3, 1.1$  Hz, 1H), 5.45 (s, 1H), 5.26 (dd,  $J = 8.3,$

1.4 Hz, 1H), 3.52 (s, 3H), 3.32 (t,  $J = 5.9$  Hz, 1H), 2.71 (ddd,  $J = 6.7, 4.8, 1.4$  Hz, 1H), 1.57 (t,  $J = 4.9$  Hz, 1H), 1.24 (s, 9H).  $^{13}\text{C}$  NMR (101 MHz, Chloroform- $d$ )  $\delta$  166.65, 161.35, 141.55, 128.58, 126.73, 126.23, 126.16, 113.59, 98.82, 55.84, 51.27, 28.92, 28.76, 25.79. **HRMS** (ESI $^{+}$ ):  $m/z$  calcd for  $\text{C}_{19}\text{H}_{23}\text{NO}_2\text{Na}$   $[\text{M}+\text{Na}]^{+}$  320.1621, found 320.1617; **HPLC**: *er* 6:94 CHIRALPAK $^{\text{®}}$  IA column, Hexane:IPA = 95:5 flow = 1.0 mL/min,  $\lambda = 280$  nm,  $t_R = 18.05$  mins (minor), and 23.82 mins (major).

### 1.17 Analytical data of Product modifications

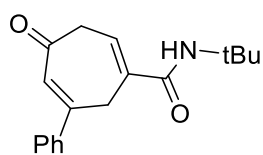

#### **tert-butyl 4-oxo-6-phenylcyclohepta-1,5-diene-1-carboxylate (6n):**

To a suspension of chiral amine (2.0 equiv) in dry THF (0.1) at  $-78$   $^{\circ}\text{C}$  (Cryostat), was added *n*-butyl lithium (3.0 equiv, 2.5 M in hexanes), dropwise. The resulting mixture was allowed to warm to room temperature over 15 minutes, resulting in a clear yellow solution. This was then cooling down to  $-78$   $^{\circ}\text{C}$ , a solution of amide **2f** (100 mg, 0.33 mmol) in THF (0.5 mL) was added dropwise and the reaction mixture was stirred at 700 rpm and irradiated with a 40 W Kessil lamp. The mixture was stirred at  $-78$   $^{\circ}\text{C}$  for 30 minutes, then the temperature of the Cryostat was set to  $-10$   $^{\circ}\text{C}$  and the reaction mixture was slowly allowed to warm. After a further 1 h, DMPU (3.0 equiv.) was added and further irradiation was continued for 4.5 h. Saturated aq.  $\text{NH}_4\text{Cl}$  was added, the layers separated, and the aqueous layer was extracted with ethyl acetate (10 x 3). The combined organic fractions were washed with brine, dried ( $\text{Na}_2\text{SO}_4$ ) and evaporated to yield a crude product, and conc HCl (1 ml) was added to a solution of the crude cycloheptadiene in THF (10 ml) at  $0$   $^{\circ}\text{C}$  and warm to room temperature for 4h, water was added to the reaction, and the layers were separated. The standard work-up gave a crude product which was purified by flash chromatography, eluting with 1:1 petrol-EtOAc to afford the title product as a yellow oil (60 mg, 60%);  $R_f = 0.35$ ;  $\nu_{\text{max}}/\text{cm}^{-1}$ (neat): 3330, 2977, 1643, 1525, 1216, 752, 697;  $^1\text{H}$  NMR (400 MHz, Chloroform- $d$ )  $\delta$  7.46 – 7.41 (m, 2H), 7.40 – 7.29 (m, 3H), 6.77 (t,  $J = 6.2$  Hz, 1H), 6.73 (s, 1H), 5.63 (s, 1H), 3.52 (s, 2H), 3.17 (d,  $J = 6.2$  Hz, 2H), 1.41 (s, 9H).  $^{13}\text{C}$  NMR (101 MHz, Chloroform- $D$ )  $\delta$  209.71, 165.86, 140.85, 139.11, 138.24, 129.19, 128.78, 128.45, 126.36, 122.78, 51.79, 49.07, 44.41, 28.87. **HRMS** (ESI $^{+}$ ):  $m/z$  calcd for  $\text{C}_{18}\text{H}_{21}\text{NO}_2\text{Na}$   $[\text{M}+\text{Na}]^{+}$  306.1464, found 306.1473.



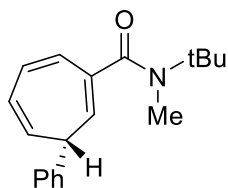

**(*R*)-*N*-(*tert*-butyl)-*N*-methyl-3-phenylcyclohepta-1,4,6-triene-1-**

**carboxamide (8):** To a suspension of chiral amine (2.0 equiv) in dry THF (0.1) at  $-78\text{ }^{\circ}\text{C}$  (Cryostat), was added *n*-butyl lithium (3.0 equiv, 2.5 M in hexanes), dropwise. The resulting mixture was allowed to warm to room temperature over 15 minutes, resulting in a clear yellow solution. This was then cooling down to  $-78\text{ }^{\circ}\text{C}$ , a solution of amide **2a** (100 mg, 0.37 mmol) in THF (0.5 mL) was added dropwise and the reaction mixture was stirred at 700 rpm and irradiated with a 40 W Kessil lamp. The mixture was stirred at  $-78\text{ }^{\circ}\text{C}$  for 30 minutes, then the temperature of the Cryostat was set to  $-10\text{ }^{\circ}\text{C}$  and the reaction mixture was slowly allowed to warm. After a further 1 h, DMPU (3.0 equiv.) was added and further irradiation was continued for 2.5 h. Stop the irradiation and 5.0 equiv iodomethane was added to reaction mixture and reaction further run for 2 h at  $-10\text{ }^{\circ}\text{C}$ . The reaction was quenched with sat. aq.  $\text{NH}_4\text{Cl}$  (15 mL), and the aqueous layer was extracted with EtOAc ( $3 \times 10\text{ mL}$ ). The combined organic fractions were washed with brine, dried ( $\text{Na}_2\text{SO}_4$ ) and evaporated to yield a crude product, which was purified by flash chromatography, eluting with 90:10 petrol-EtOAc afforded the title compound (71 mg, 68%) as a colorless needles (**MP**:  $107\text{--}109\text{ }^{\circ}\text{C}$ ).  $R_f = 0.40$ ;  $[\alpha]_D^{22.6} = 92$  ( $c = 1.00$  in  $\text{CHCl}_3$ );  $\nu_{\text{max}}/\text{cm}^{-1}$ (neat): 2972, 1636, 1365, 1066, 699;  $^1\text{H NMR}$  (400 MHz, Chloroform-*d*)  $\delta$  7.37 – 7.34 (m, 4H), 7.27 (d,  $J = 1.4\text{ Hz}$ , 1H), 6.91 – 6.85 (m, 1H), 6.80 (dd,  $J = 11.1, 5.6\text{ Hz}$ , 1H), 6.29 – 6.23 (m, 1H), 5.51 (ddq,  $J = 9.2, 5.6, 0.8\text{ Hz}$ , 1H), 5.43 – 5.38 (m, 1H), 2.71 (td,  $J = 5.7, 1.5\text{ Hz}$ , 1H), 2.66 (s, 3H), 1.40 (s, 9H).  $^{13}\text{C NMR}$  (101 MHz, Chloroform-*d*)  $\delta$  172.65, 143.19, 136.00, 131.73, 129.67, 128.84, 127.70, 126.91, 126.38, 124.87, 124.13, 56.48, 44.62, 34.38, 27.78. **HRMS** (ESI $^{+}$ ):  $m/z$  calcd for  $\text{C}_{19}\text{H}_{23}\text{NONa}$   $[\text{M}+\text{Na}]^{+}$  304.1671, found 304.1671; **HPLC**: *er* 9:91; CHIRALPAK® IA, Hexane:IPA = 95:5 flow = 1.0 mL/min,  $\lambda = 280\text{ nm}$ ,  $t_R = 5.79\text{ mins}$  (minor), and 6.65 mins (major).

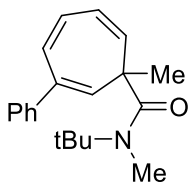

***N*-(*tert*-butyl)-*N*,1-dimethyl-3-phenylcyclohepta-2,4,6-triene-1-carboxamide**

**(9):** The (*R*)-*N*-(*tert*-butyl)-*N*-methyl-3-phenylcyclohepta-1,4,6-triene-1-carboxamide (**8**, 100 mg,

0.35 mmol) was dissolved in dry THF (0.1 M) under a nitrogen atmosphere. After cooling down to -10 °C (Cryostat), freshly prepared LDA (1.5 equiv) was sequentially added dropwise and the reaction mixture was stirred at 700 rpm. After 15 mins, iodomethane (4.0 equiv.) was added and the reaction was continued for 2 h. The reaction was quenched with sat. aq. NH<sub>4</sub>Cl (5 mL), and the aqueous layer was extracted with EtOAc (3 × 10 mL). The combined organics were washed with brine (1 × 10 mL), dried over MgSO<sub>4</sub> and concentrated under reduced pressure to give a crude residue. Purification by flash silica chromatography (10:90 EtOAc/Hexane) afforded the title compound as yellow oil.  $R_f$  = 0.40;  $\nu_{\max}$  /cm<sup>-1</sup>(neat): 2971, 1634, 1363, 1217, 1143, 1074, 752, 698; **<sup>1</sup>H NMR** (400 MHz, Chloroform-*d*)  $\delta$  7.22 – 7.17 (m, 2H), 7.17 – 7.11 (m, 2H), 7.10 – 7.05 (m, 1H), 6.38 – 6.35 (m, 2H), 6.29 (ddd,  $J$  = 8.9, 5.1, 2.1 Hz, 1H), 5.33 – 5.27 (m, 2H), 2.69 (s, 3H), 1.53 (s, 3H), 1.45 (s, 9H). **<sup>13</sup>C NMR** (101 MHz, Chloroform-*d*)  $\delta$  173.07, 146.63, 136.76, 130.12, 128.91, 128.12, 127.39, 126.77, 125.88, 125.73, 123.41, 120.59, 56.45, 40.74, 34.16, 30.83, 27.87. **HRMS** (ESI<sup>+</sup>):  $m/z$  calcd for C<sub>20</sub>H<sub>25</sub>NONa [M+Na]<sup>+</sup> 318.1834, found 318.1834. **HPLC**: *er* 53:47; CHIRALPAK® IA, Hexane:IPA = 99:1 flow = 1.0 mL/min,  $\lambda$  = 280 nm, *t*R = 6.70 mins, and 7.39 mins.

### 1.18 Analytical data of stereospecific photochemical ring expansion

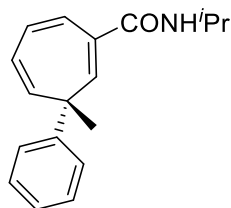

**(*R*)-*N*-isopropyl-3-methyl-3-phenylcyclohepta-1,4,6-triene-1-carboxamide (11a):** The (*R*)-*N*-isopropyl-*N*-(1-phenylethyl)benzamide **10a** (100 mg, 0.37 mmol) was dissolved in dry THF (0.1 M) under a nitrogen atmosphere. After cooling down to -10 °C (Cryostat), freshly prepared LDA (2.0 equiv) and DMPU (6.0 equiv) were sequentially added dropwise and the reaction mixture was stirred at 700 rpm and irradiated with a 40 W Kessil lamp for 8 h at -10 °C. The reaction was quenched with sat. aq. NH<sub>4</sub>Cl (15 mL), and the aqueous layer was extracted with EtOAc (3 × 10 mL). The combined organics were washed with brine (1 × 10 mL), dried over MgSO<sub>4</sub> and concentrated under reduced pressure to give a crude residue. Purification by flash silica chromatography (20% EtOAc/Hexane) afforded the title compound (90 mg, 90%) as pale yellow needles (**MP**: 104-106 °C);  $R_f$  = 0.17;  $[\alpha]_D^{23}$  = -92 ( $c$  = 1.00 in CHCl<sub>3</sub>);  $\nu_{\max}$  /cm<sup>-1</sup> (neat): 3304, 2971, 1634, 1527, 1445, 1055, 749, 698; **<sup>1</sup>H NMR** (400 MHz, Chloroform-*d*)  $\delta$  7.20 – 7.13 (m,

4H), 7.13 – 7.08 (m, 1H), 6.63 – 6.56 (m, 1H), 6.36 – 6.27 (m, 2H), 5.63 (d,  $J = 7.8$  Hz, 1H), 5.18 (dd,  $J = 3.4, 1.2$  Hz, 1H), 4.71 – 4.64 (m, 1H), 4.18 (dp,  $J = 7.8, 6.5$  Hz, 1H), 1.48 (s, 3H), 1.21 (d,  $J = 6.5$  Hz, 6H).  $^{13}\text{C}$  NMR (101 MHz, Chloroform- $d$ )  $\delta$  167.05, 145.39, 131.69, 128.84, 127.30, 126.99, 126.88, 125.95, 125.77, 104.70, 41.63, 35.21, 28.40, 22.63. **HRMS** (ESI $^{+}$ ):  $m/z$  calcd for  $\text{C}_{18}\text{H}_{21}\text{NONa}$   $[\text{M}+\text{Na}]^{+}$  290.1515, found 290.1525; **HPLC**: er 0.42:99.57, Chiral Whelk O1, Hexane-IPA (80:20), flow = 1.0 mL/min,  $\lambda = 280$  nm  $t_R = 15.472$  mins(minor) and 20.112 mins (major).

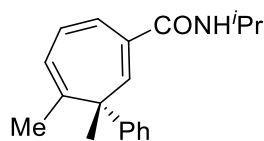

**(*R*)-*N*-isopropyl-3,4-dimethyl-3-phenylcyclohepta-1,4,6-triene-1-carboxamide (11b):**

The (*R*)-*N*-isopropyl-3-methyl-*N*-(1-phenylethyl)benzamide **10b** (100 mg, 0.35 mmol) was dissolved in dry THF (0.1 M) under a nitrogen atmosphere. After cooling down to  $-10$  °C (Cryostat), freshly prepared LDA (2.0 equiv) and DMPU (6.0 equiv) were sequentially added dropwise and the reaction mixture was stirred at 700 rpm and irradiated with a 40 W Kessil lamp for 4 h at  $-10$  °C. The reaction was quenched with sat. aq.  $\text{NH}_4\text{Cl}$  (15 mL), and the aqueous layer was extracted with EtOAc ( $3 \times 10$  mL). The combined organics were washed with brine ( $1 \times 10$  mL), dried over  $\text{MgSO}_4$  and concentrated under reduced pressure to give a crude residue. Purification by flash silica chromatography (25% EtOAc/Hexane) afforded the title compound (80 mg, 80%) as pale-yellow oil.  $R_f = 0.40$ ;  $[\alpha]_D^{22.7} = -80$  ( $c = 1.00$  in  $\text{CHCl}_3$ );  $\nu_{\text{max}}/\text{cm}^{-1}$ (neat): 3318, 2971, 1635, 1527, 1445, 1066, 749, 699;  $^1\text{H}$  NMR (400 MHz, Chloroform- $d$ )  $\delta$  4.41 – 4.32 (m, 5H), 3.73 (dq,  $J = 7.8, 3.4$  Hz, 1H), 3.56 – 3.46 (m, 2H), 3.08 (s, 1H), 2.96 – 2.80 (m, 1H), 1.47 (dp,  $J = 13.5, 6.8$  Hz, 1H), -0.62 (s, 3H), -1.11 (s, 3H), -1.49 (d,  $J = 2.5$  Hz, 3H), -1.50 (d,  $J = 2.5$  Hz, 3H).  $^{13}\text{C}$  NMR (101 MHz, Chloroform- $d$ )  $\delta$  167.21, 146.00, 132.08, 130.59, 127.08, 126.78, 125.70, 125.36, 124.31, 122.73, 43.83, 41.88, 29.84, 22.87. **HRMS** (ESI $^{+}$ ):  $m/z$  calcd for  $\text{C}_{19}\text{H}_{23}\text{NONa}$   $[\text{M}+\text{Na}]^{+}$  304.1672, found 304.1682; **HPLC**: er 2: 98 Chiral Whelk O1, Hexane:IPA = 85:15, flow = 1.0 mL/min,  $\lambda = 280$  nm,  $t_R = 25.838$  mins (major) and 28.485 mins (minor).

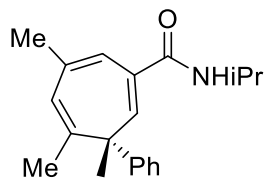

**(S)-N-isopropyl-3,4,6-trimethyl-3-phenylcyclohepta-1,4,6-triene-1-carboxamide (11c):** The (*R*)-*N*-isopropyl-3,5-dimethyl-*N*-(1-phenylethyl)benzamide **10c** (100 mg, 0.33 mmol) was dissolved in dry THF (0.1 M) under a nitrogen atmosphere. After cooling down to -10 °C (Cryostat), freshly prepared LDA (2.0 eq.) and DMPU (6.0 equiv) were sequentially added dropwise and the reaction mixture was stirred at 700 rpm and irradiated with a 40 W Kessil lamp for 4 h at -10 °C (Cryostat). The reaction was quenched with sat. aq. NH<sub>4</sub>Cl (15 mL), and the aqueous layer was extracted with EtOAc (3 × 10 mL). The combined organics were washed with brine (1 × 10 mL), dried over MgSO<sub>4</sub> and concentrated under reduced pressure to give a crude residue. Purification by flash silica chromatography (25% EtOAc/Hexane) afforded the title compound (57 mg, 57%) as colorless oil. *R*<sub>f</sub> = 0.30; [α]<sub>D</sub><sup>21</sup> = -124 (c = 1.00 in CHCl<sub>3</sub>); ν<sub>max</sub>/cm<sup>-1</sup> (neat): 3294, 2971, 1638, 1533, 1450; <sup>1</sup>H NMR (400 MHz, Chloroform-*d*) δ 7.08 – 7.01 (m, 5H), 6.16 (s, 1H), 6.00 (s, 1H), 5.76 (s, 1H), 5.57 (d, *J* = 9.4 Hz, 1H), 4.16 (dq, *J* = 13.1, 6.5 Hz, 1H), 2.02 (s, 3H), 1.69 (s, 3H), 1.54 (s, 3H), 1.20 (d, *J* = 2.6 Hz, 3H), 1.18 (d, *J* = 2.6 Hz, 3H). <sup>13</sup>C NMR (101 MHz, Chloroform-*d*) δ 167.55, 146.90, 140.13, 132.17, 127.16, 126.59, 125.69, 122.65, 43.84, 41.87, 29.62, 23.53, 22.96, 22.91, 22.58. HRMS (ESI<sup>+</sup>): *m/z* calcd for C<sub>20</sub>H<sub>25</sub>NONa [M+Na]<sup>+</sup> 318.34, found 318.48; HPLC: er 90:10 Chiral Whelk O1, Hexane:IPA = 85:15 flow = 1.0 mL/min, λ = 280 nm, t<sub>R</sub> = 14.81 (major), and 16.01 (minor).

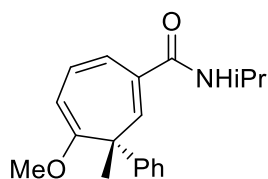

**(R)-N-isopropyl-4-methoxy-3-methyl-3-phenylcyclohepta-1,4,6-triene-1-carboxamide (11d):** The (*R*)-*N*-isopropyl-3-methoxy-*N*-(1-phenylethyl)benzamide **10d** (100 mg, 0.33 mmol) was dissolved in dry THF (0.1 M) under a nitrogen atmosphere. After cooling down to -10 °C (Cryostat), freshly prepared LDA (2.0 eq.) and DMPU (6.0 equiv) were sequentially added dropwise and the reaction mixture was stirred at 700 rpm and irradiated with a 40 W Kessil lamp for 8 h at -10 °C. The reaction was quenched with sat. aq. NH<sub>4</sub>Cl (15 mL), and the aqueous layer was extracted with EtOAc (3 × 10 mL). The combined organics were washed with brine (1 × 10 mL), dried over MgSO<sub>4</sub> and concentrated under reduced pressure to give a crude residue. Purification by flash silica chromatography (30% EtOAc/Hexane) afforded the title compound (76 mg, 76%) as colorless needles. *R*<sub>f</sub> = 0.40; **MP**: 192-194 °C; [α]<sub>D</sub><sup>21</sup> = -124 (c = 1.00 in CHCl<sub>3</sub>);

$\nu_{\text{max}}/\text{cm}^{-1}$ (neat): 3333, 2971, 1637, 1542, 1415,  $^1\text{H NMR}$  (400 MHz, Chloroform-*d*)  $\delta$  7.04 – 6.93 (m, 5H), 6.17 (d,  $J$  = 6.6 Hz, 2H), 6.10 (s, 1H), 5.56 (d,  $J$  = 7.1 Hz, 1H), 5.48 (d,  $J$  = 6.0 Hz, 1H), 4.16 – 4.05 (m, 1H), 3.69 (s, 3H), 1.57 (s, 3H), 1.14 (dd,  $J$  = 6.6, 3.3 Hz, 7H).  $^{13}\text{C NMR}$  (101 MHz, Chloroform-*d*)  $\delta$  167.27, 158.86, 145.02, 133.66, 131.79, 129.57, 128.27, 126.97, 126.07, 125.83, 120.06, 98.05, 56.94, 48.43, 41.88, 29.53, 22.82. **HRMS** (ESI<sup>+</sup>):  $m/z$  calcd for  $\text{C}_{19}\text{H}_{23}\text{NO}_2\text{Na}$   $[\text{M}+\text{Na}]^+$  320.1621, found 320.1632; **HPLC**: *er* 100:00 Chiral Whelk O1, Hexane:IPA = 85:15, flow = 1.0 mL/min,  $\lambda$  = 280 nm,  $t_R$  = 17.575.

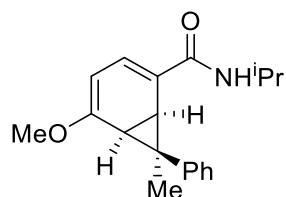

**(1*R*,6*S*,7*R*)-*N*-isopropyl-5-methoxy-7-methyl-7-phenylbicyclo[4.1.0]hepta-2,4-diene-2-carboxamide (11e)**: The (*R*)-*N*-isopropyl-4-methoxy-*N*-(1-phenylethyl)benzamide **10e** (100 mg, 0.33 mmol) was dissolved in dry THF (0.1 M) under a nitrogen atmosphere. After cooling down to -10 °C (Cryostat), freshly prepared LDA (2.0 equiv) and DMPU (6.0 equiv) were sequentially added dropwise and the reaction mixture was stirred at 700 rpm and irradiated with a 40 W Kessil lamp for 5 h at -10 °C (Cryostat). The reaction was quenched with sat. aq.  $\text{NH}_4\text{Cl}$  (15 mL), and the aqueous layer was extracted with EtOAc ( $3 \times 10$  mL). The combined organics were washed with brine ( $1 \times 10$  mL), dried over  $\text{MgSO}_4$  and concentrated under reduced pressure to give a crude residue. Purification by flash silica chromatography (30% EtOAc/Hexane) afforded the title compound (85 mg, 85%) as colorless needles (**MP**: 114-116 °C).  $R_f$  = 0.17;  $[\alpha]_D^{21}$  = -36 ( $c$  = 1.00 in  $\text{CHCl}_3$ );  $\nu_{\text{max}}/\text{cm}^{-1}$ (neat): 3336, 2971, 1555, 1219, 1174, 1027, 748, 699;  $^1\text{H NMR}$  (400 MHz, Chloroform-*d*)  $\delta$  7.26 – 7.16 (m, 4H), 7.11 (ddd,  $J$  = 8.6, 5.4, 2.6 Hz, 1H), 6.57 (d,  $J$  = 7.1 Hz, 1H), 5.49 (d,  $J$  = 6.3 Hz, 1H), 4.97 (d,  $J$  = 7.1 Hz, 1H), 4.14 (dq,  $J$  = 13.3, 6.6 Hz, 1H), 3.63 (s, 3H), 2.58 (dd,  $J$  = 9.1, 0.9 Hz, 1H), 2.31 (dd,  $J$  = 9.1, 1.2 Hz, 1H), 1.17 – 1.11 (m, 9H).  $^{13}\text{C NMR}$  (101 MHz,  $\text{CDCl}_3$ )  $\delta$  166.84, 161.24, 128.52, 128.36, 128.01, 126.29, 121.22, 93.11, 55.77, 41.52, 34.03, 33.31, 23.02, 16.14. **HRMS** (ESI<sup>+</sup>):  $m/z$  calcd for  $\text{C}_{19}\text{H}_{23}\text{NO}_2\text{Na}$   $[\text{M}+\text{Na}]^+$  320.1621, found 320.1632; **HPLC**: *er* 2:98; Chiral Whelk O1, Hexane:IPA = 70:30, flow = 1.0 mL/min,  $\lambda$  = 280 nm,  $t_R$  = 14.25 (minor), and 22.63 (major).

### 1.19 Analytical data of carbolithiation and photochemical rearrangements

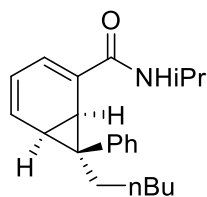

**(1R,6S,7S)-N-isopropyl-7-pentyl-7-phenylbicyclo[4.1.0]hepta-2,4-diene-2-**

**carboxamide (14):** To a stirred solution of freshly distilled (–)-sparteine (2 equiv.) in dry diethyl ether (3.7 mL) at  $-78^{\circ}\text{C}$ , RLi (2 equiv.) was added resulting in a pale-yellow solution. The reaction was left to stir at the same temperature for 15 min. before the *N*-isopropyl-*N*-(1-phenylvinyl)benzamide (0.37 mmol, 1 equiv.) in solution in dry diethyl ether (1 mL) was slowly added dropwise resulting in a red-orange solution and irradiated with a 40 W Kessil lamp. The reaction was warm up to  $-10^{\circ}\text{C}$  and stirred for 5 h. The reaction was quenched with sat. aq.  $\text{NH}_4\text{Cl}$  (15 mL), and the aqueous layer was extracted with EtOAc ( $3 \times 10$  mL). The combined organics were washed with brine ( $1 \times 10$  mL), dried over  $\text{MgSO}_4$  and concentrated under reduced pressure to give a crude residue. Purification by flash silica chromatography (10% EtOAc/Hexane) afforded the title compound (50 mg, 41%) as yellow oil.  $R_f = 0.17$ ;  $[\alpha]_D^{25} = -68$  ( $c = 1.00$  in  $\text{CHCl}_3$ );  $\nu_{\text{max}}/\text{cm}^{-1}$ (neat): 3334, 2971, 1560, 1230, 1174;  $^1\text{H NMR}$  (400 MHz, Chloroform-*d*)  $\delta$  7.18 – 7.05 (m, 5H), 6.47 (d,  $J = 8.6$  Hz, 1H), 6.29 (t,  $J = 7.4$  Hz, 1H), 6.16 – 6.07 (m, 1H), 5.61 (d,  $J = 7.7$  Hz, 1H), 4.32 (d,  $J = 5.6$  Hz, 1H), 4.25 – 4.14 (m, 1H), 3.89 (dd,  $J = 7.4, 5.0$  Hz, 1H), 1.67 – 1.59 (m, 2H), 1.19 (dq,  $J = 13.5, 7.5, 6.7, 2.8$  Hz, 12H), 0.82 – 0.75 (m, 3H).  $^{13}\text{C NMR}$  (101 MHz, Chloroform-*d*)  $\delta$  167.36, 142.45, 131.09, 129.34, 128.08, 127.37, 126.87, 126.08, 125.50, 80.21, 79.76, 41.83, 39.89, 33.97, 32.15, 25.52, 22.99, 22.60, 14.09. **HRMS** (ESI+):  $m/z$  calcd for  $\text{C}_{22}\text{H}_{29}\text{NONa}$   $[\text{M}+\text{Na}]^+$  346.2141, found 346.2137; **HPLC**: er 27:73, Chiral Whelk O1, Hexane:IPA = 92:08, flow = 1.0 mL/min,  $\lambda = 254$  nm,  $t_R = 28.04$  (minor) and 29.3 (major) min.

## 2 Mechanistic Study

### 2.1 experimental setup of ReactIR

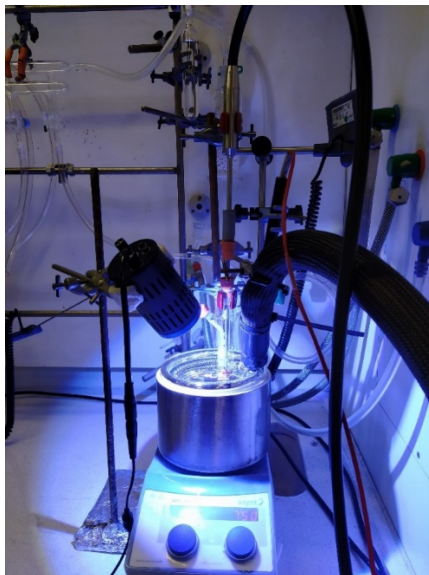

#### 2.1.1 React-IR study

Starting material  
peaks with  
THF+DMPU in  
background

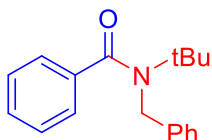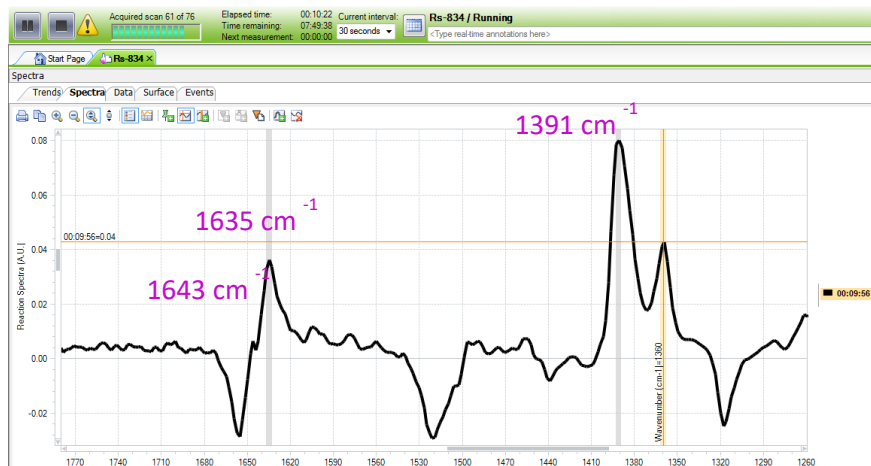

LDA addition

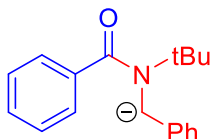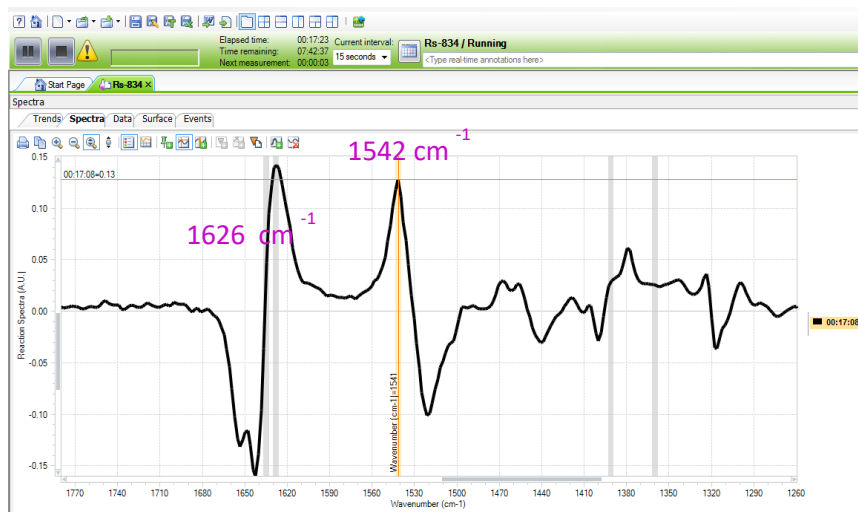

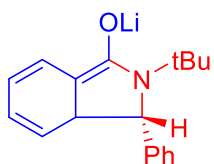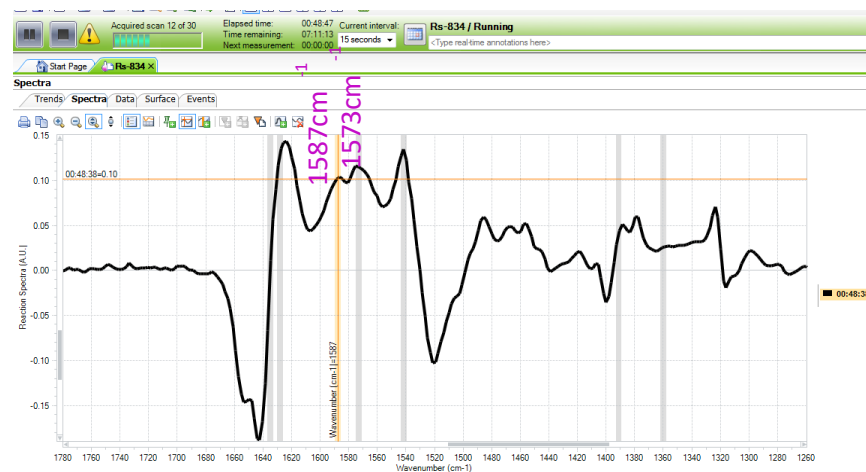

After (1.14 h)

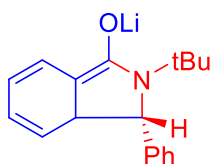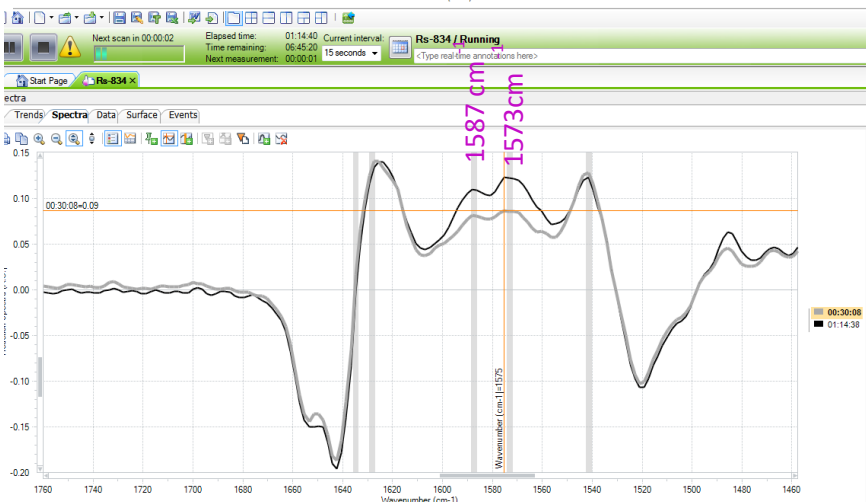

dearomatizing  
cyclization done  
Confirmed by  
TLC

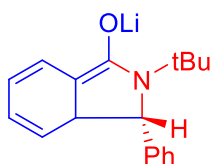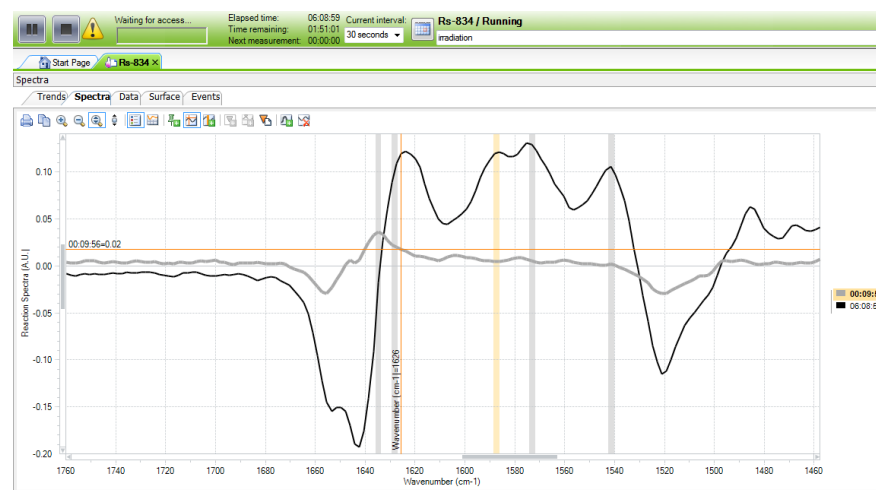



Irradiation start  
(after 10 mins of  
irradiation)

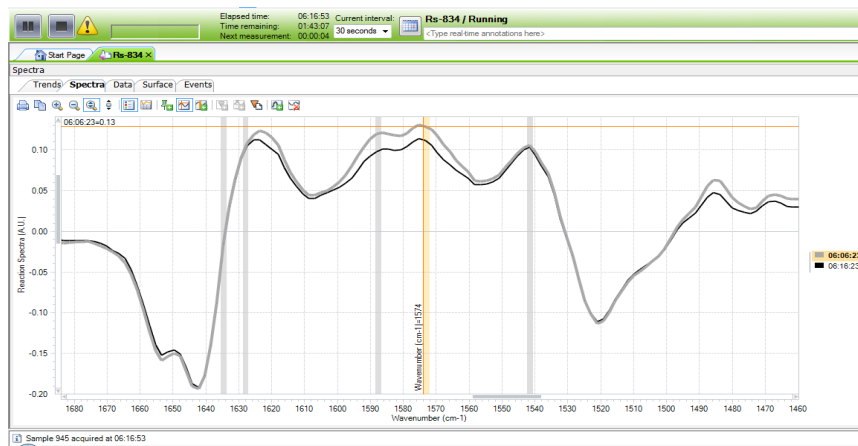

After 50 mins of  
Irradiation

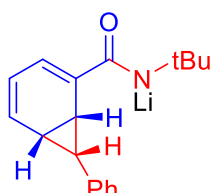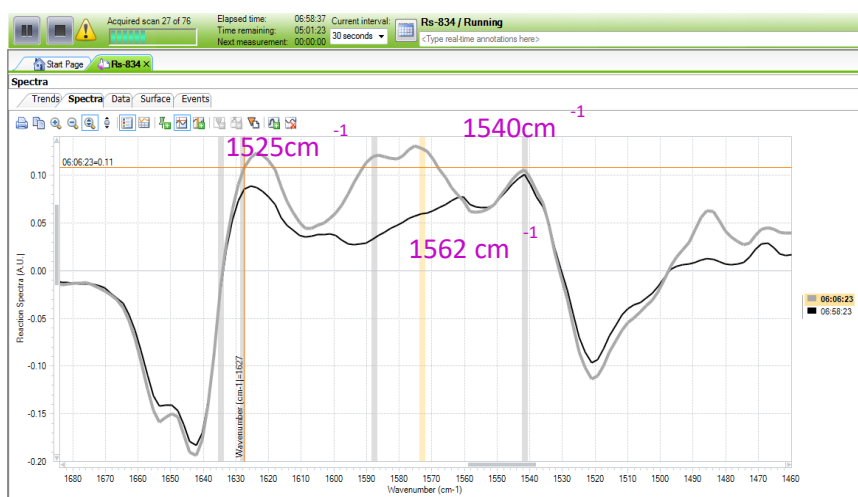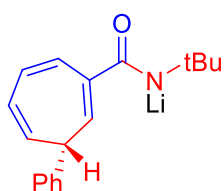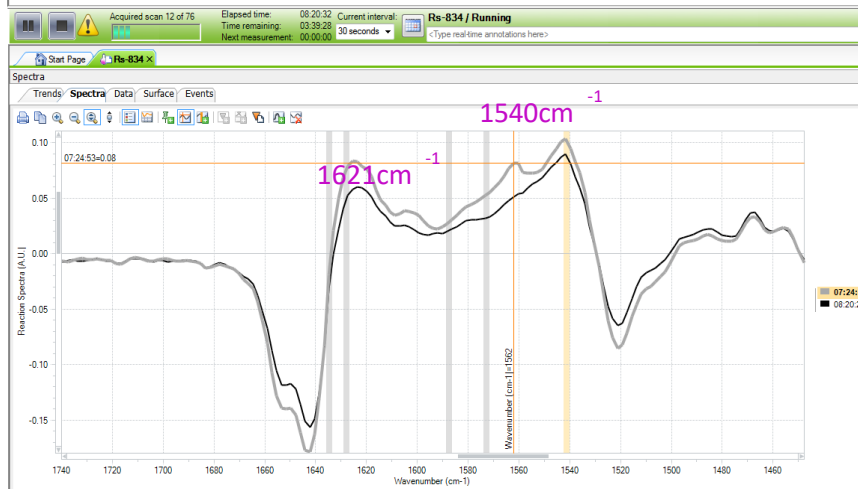

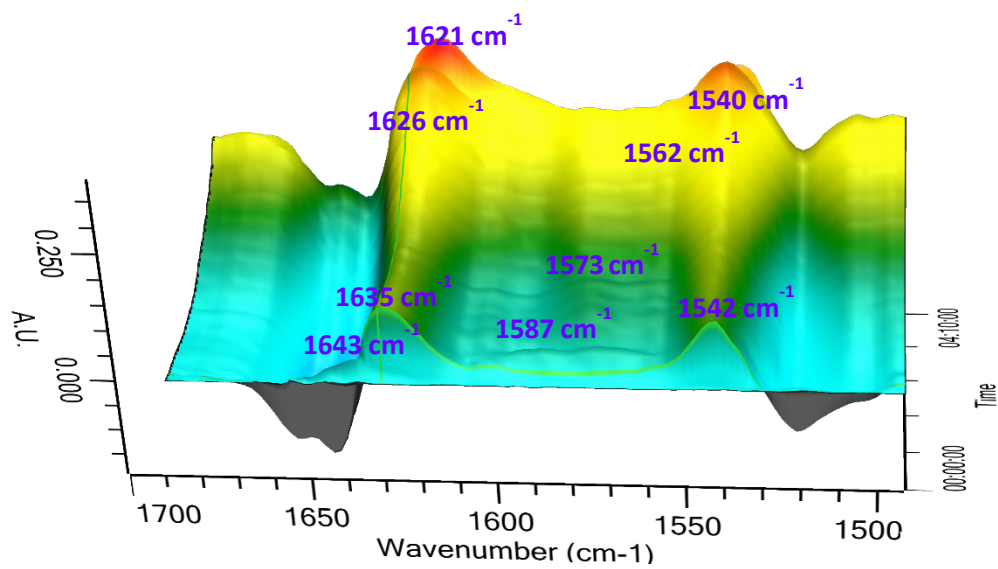

## 2.2 NMR Study

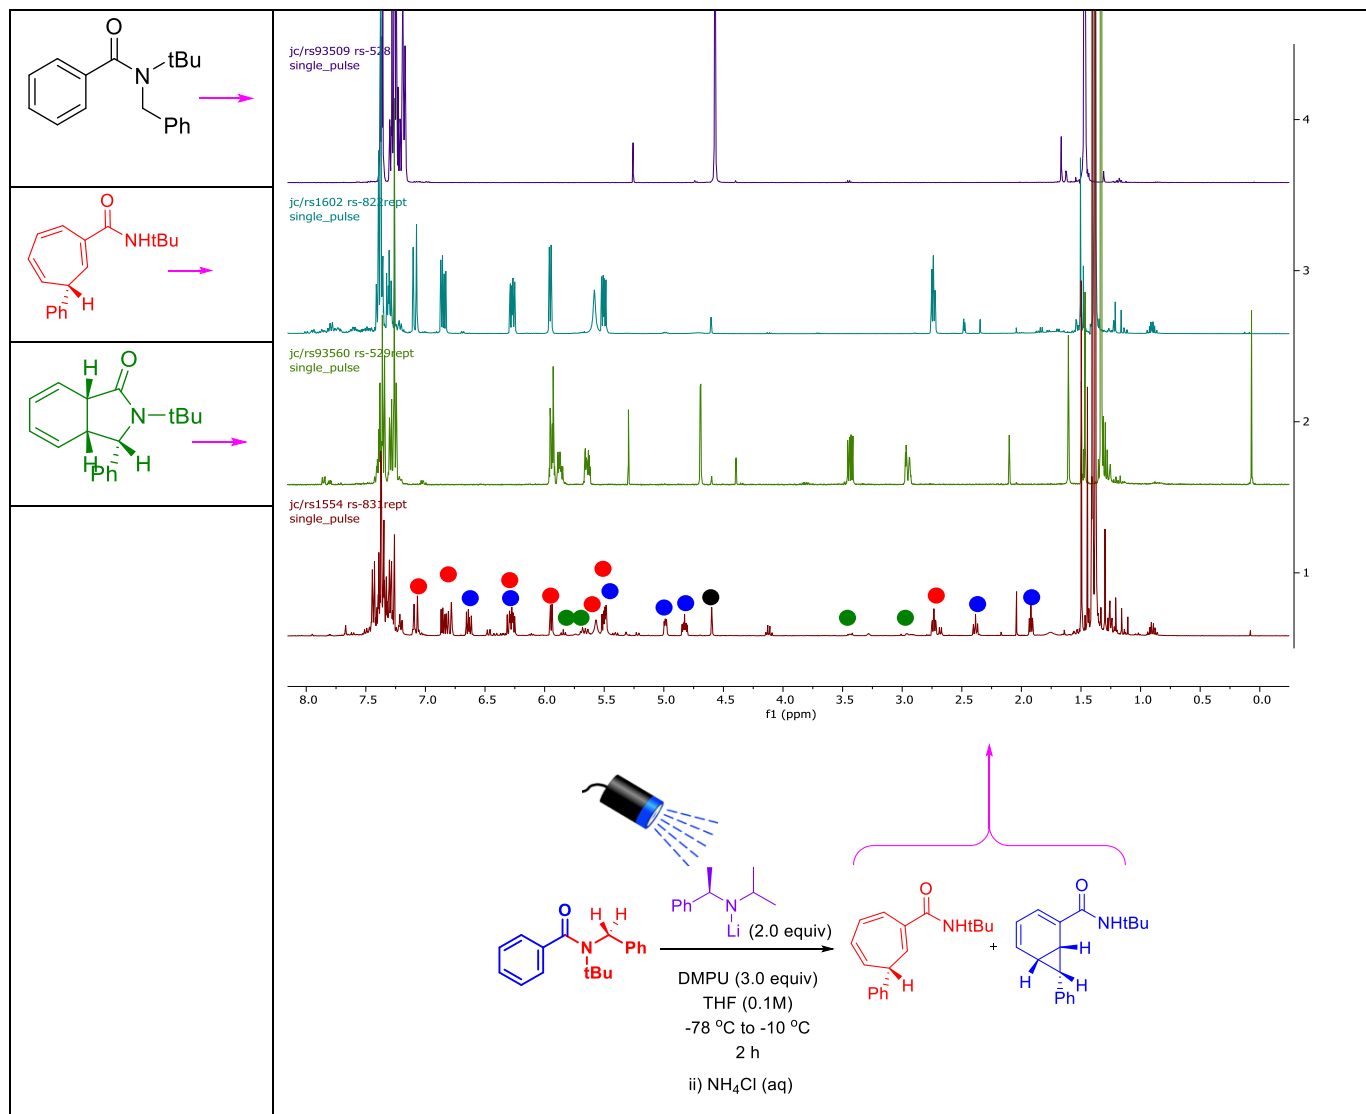

## Reaction monitoring by NMR

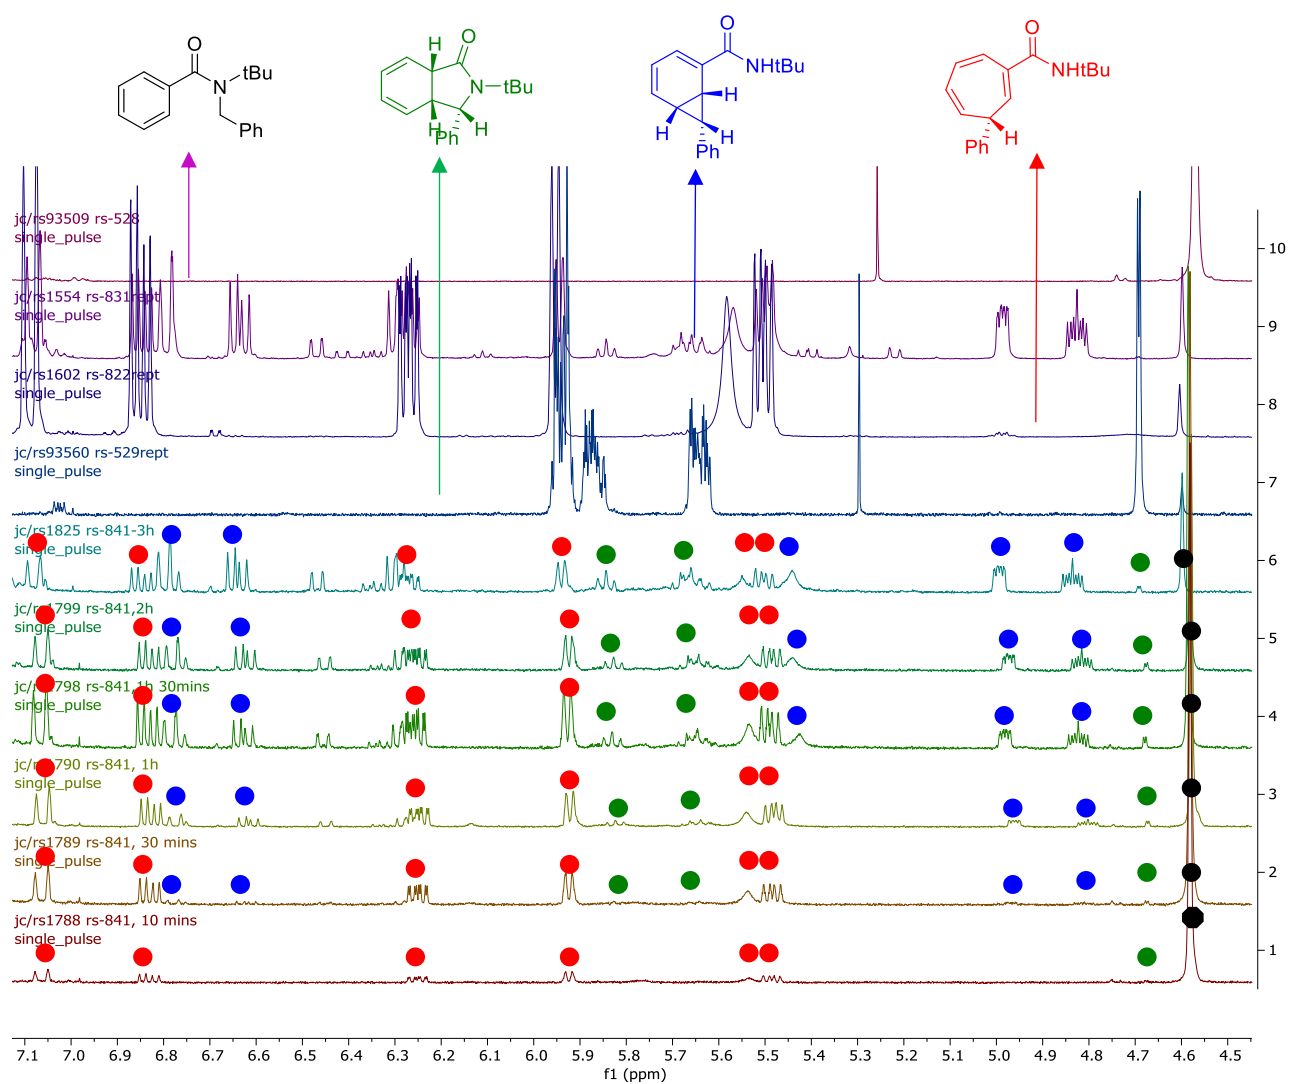

## NMR ratio after 3 h and Final ratio

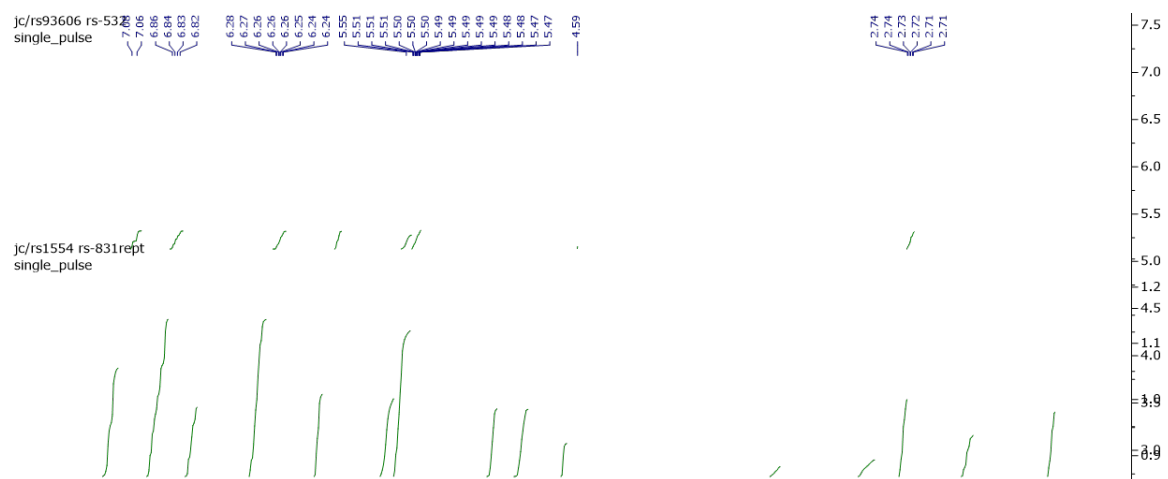

## Final ratio

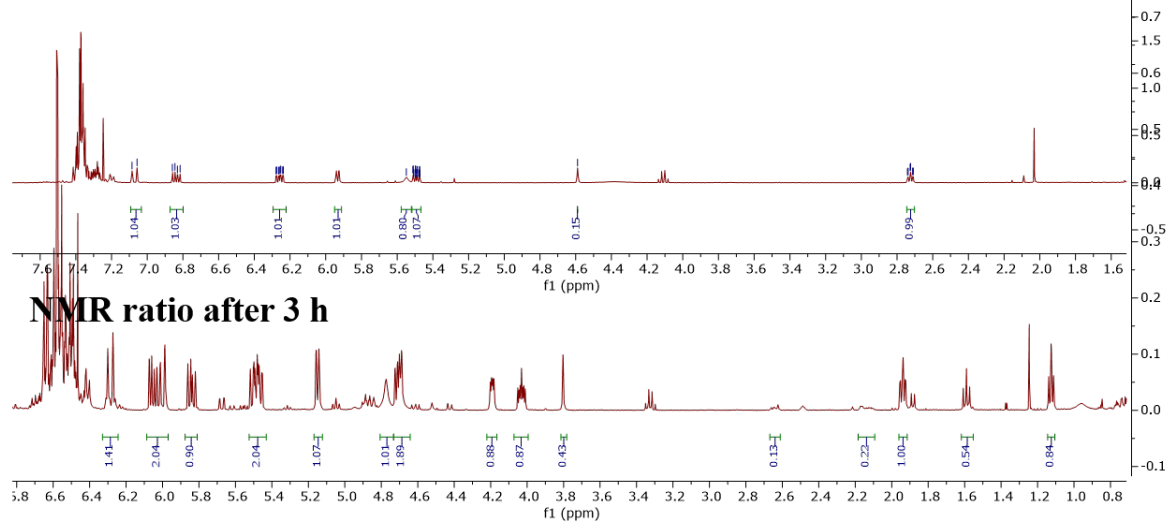

## 2.2 VCD spectra

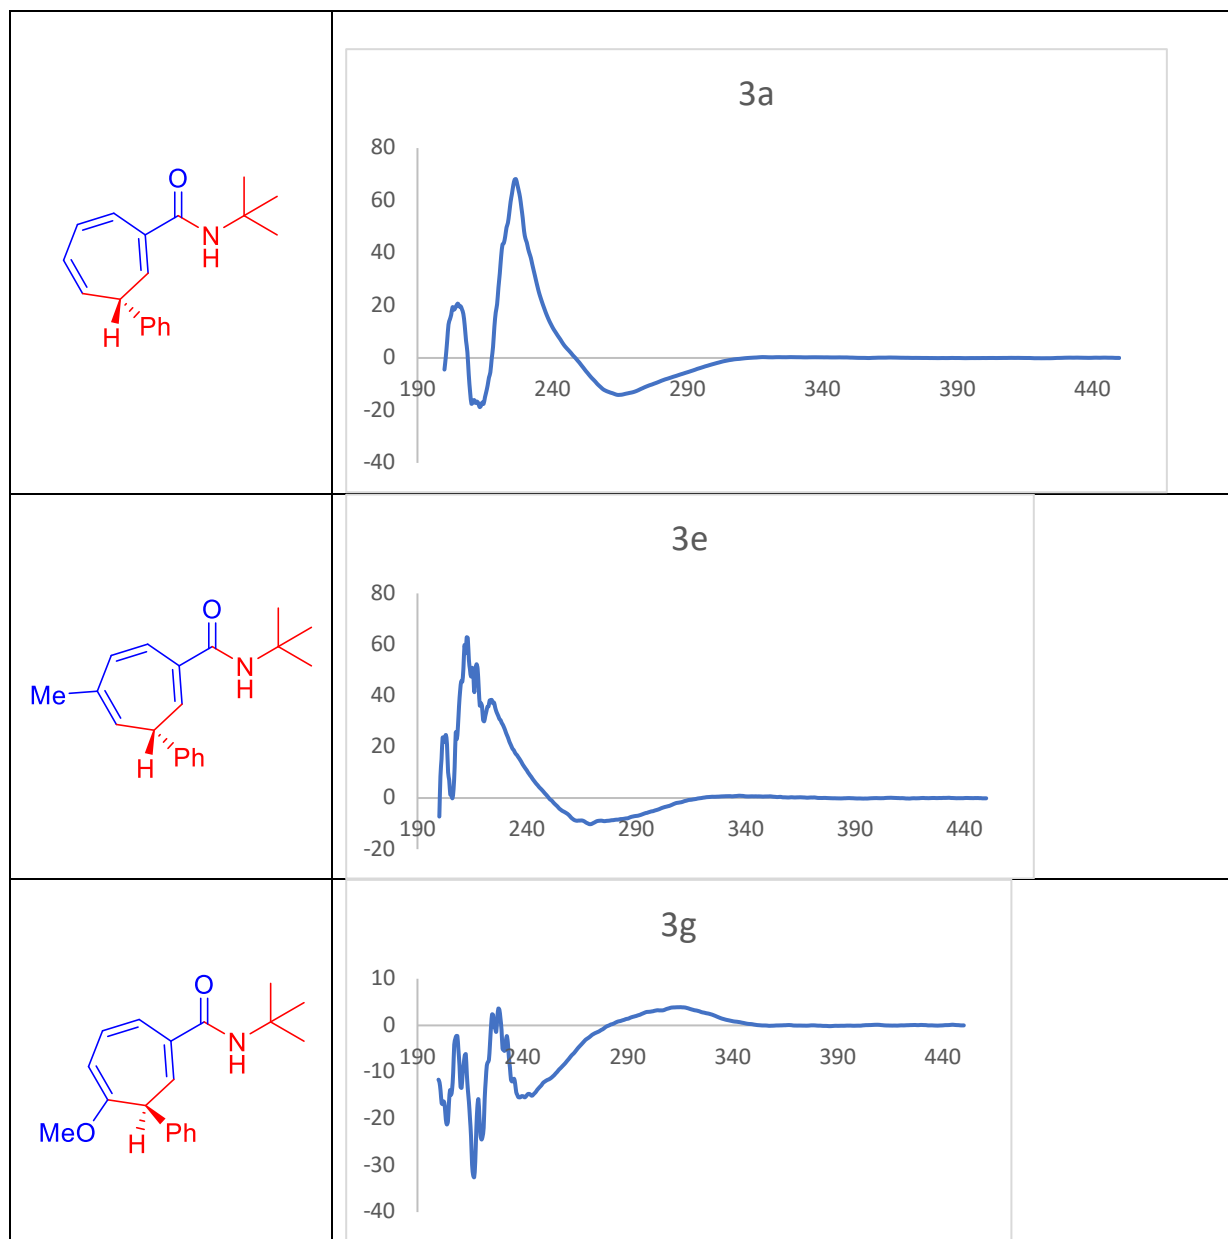

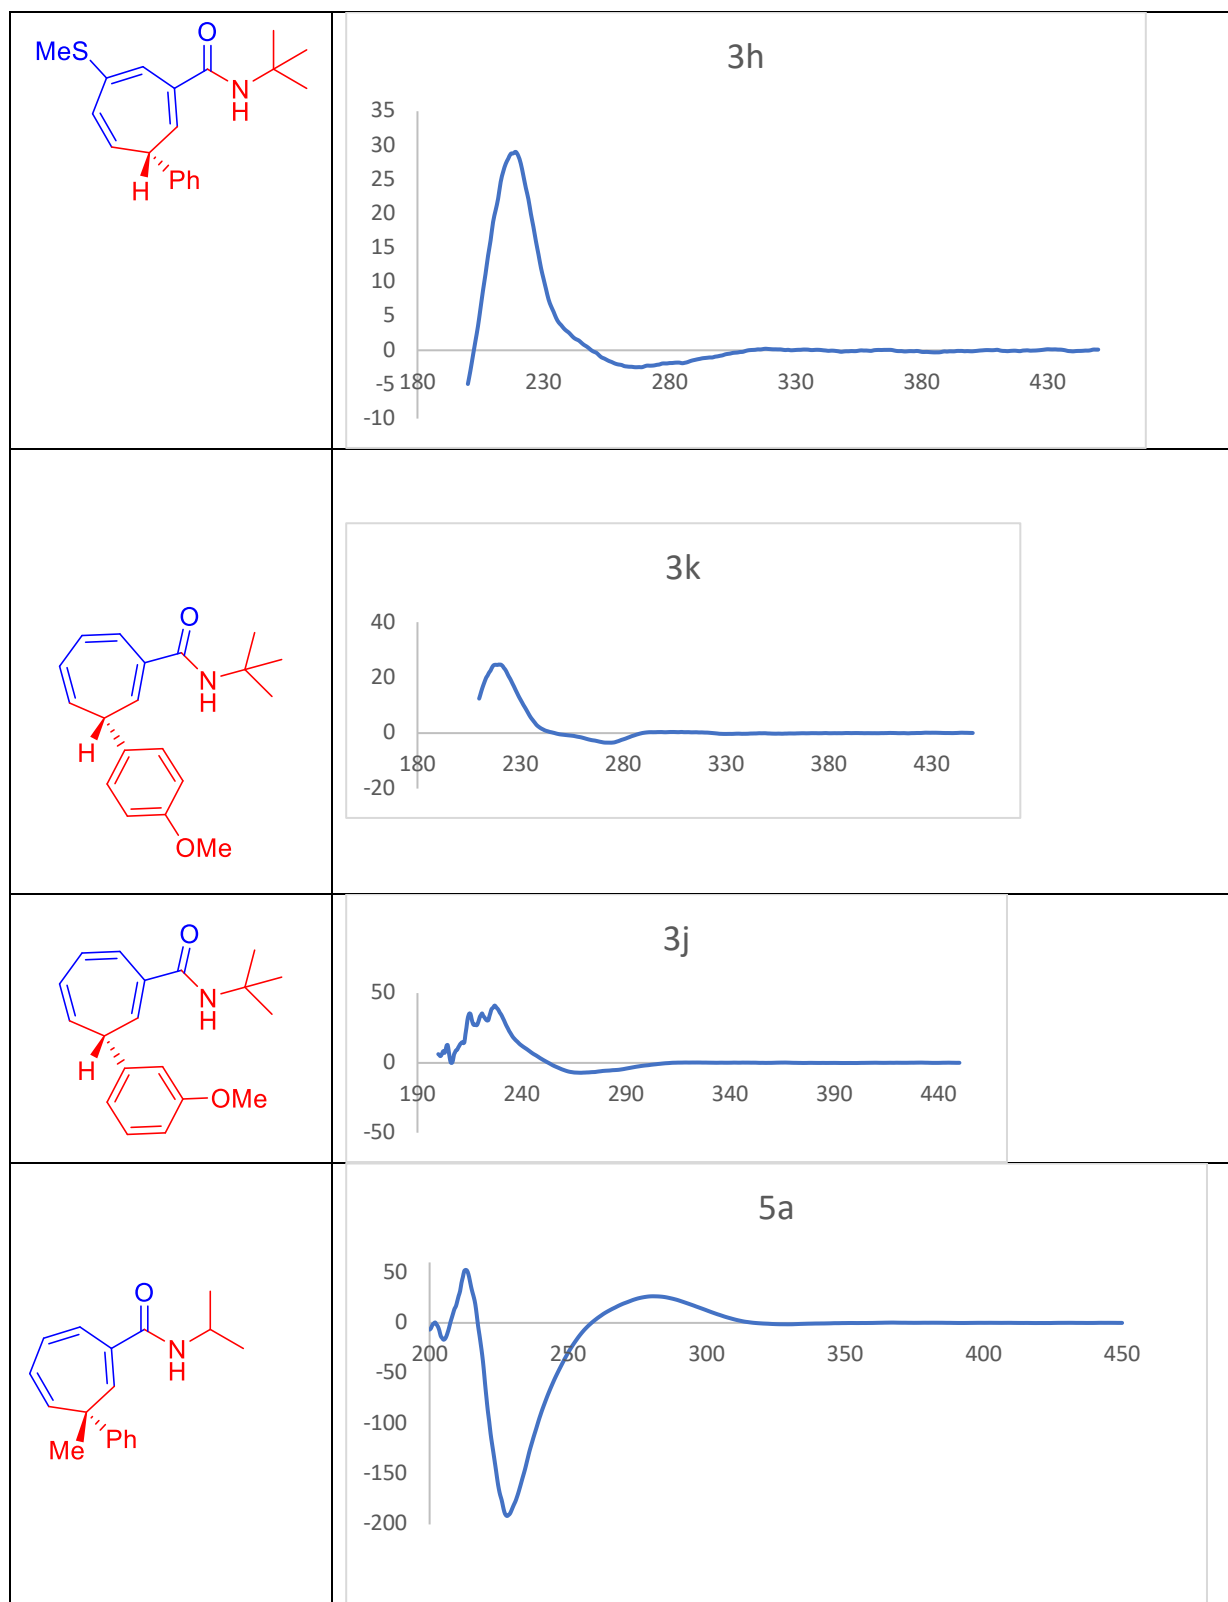

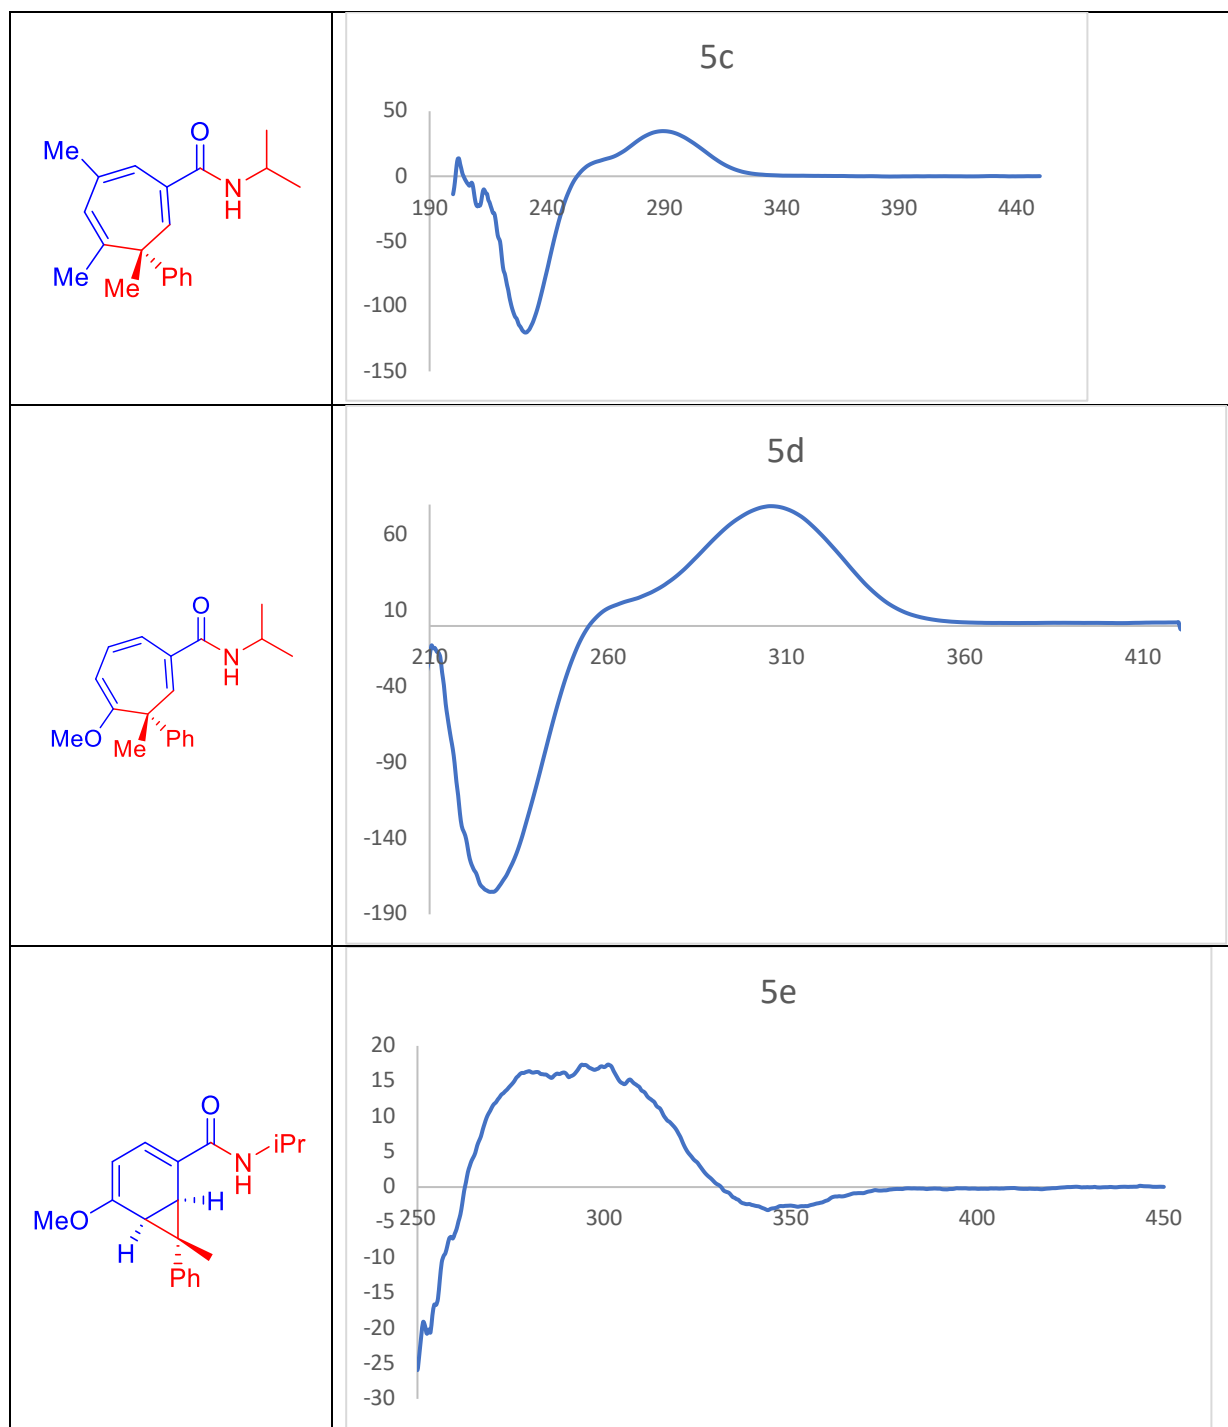



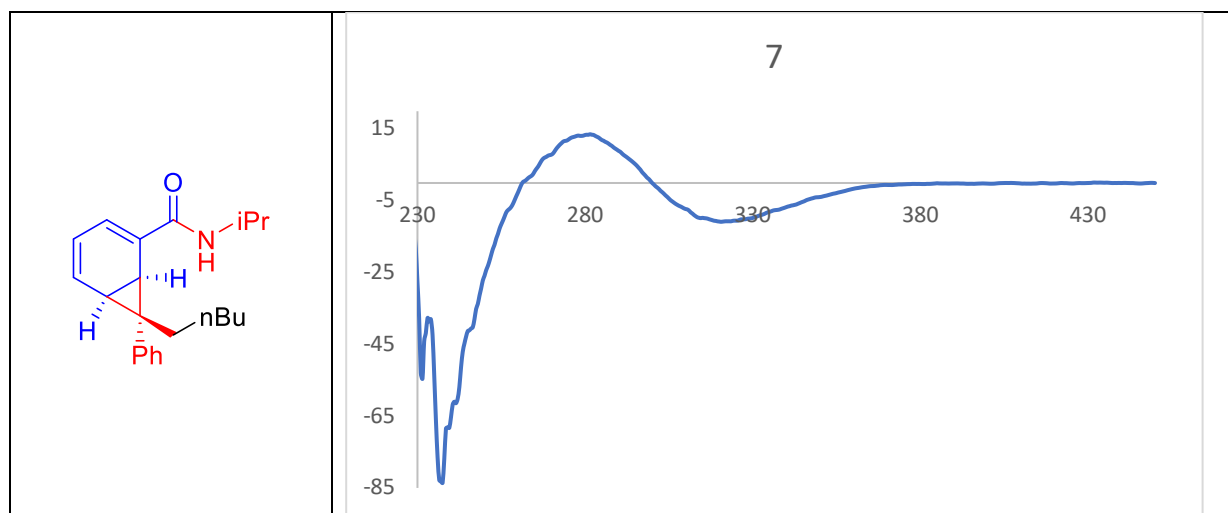

## Time-Dependent DFT Calculations

Computational characterizations of the ground- and excited-state properties of the enolate were performed using Gaussian 16 software<sup>7</sup>. The ground electronic state geometry of the enolate was computed using density functional theory (DFT). The B3LYP functional was used with the 6-31+G(d,p) basis set. Solvent effects for THF were included by implicit simulation of solvation as a conductor-like polarizable continuum medium. Vertical transition energies, oscillator strengths and excitation amplitudes were computed using time-dependent density functional theory (TD-DFT) using the Coulomb attenuated variant of the B3LYP functional (CAM-B3LYP). CAM-B3LYP was used with the 6-31+G(d,p) basis set and conductor-like continuum simulation of THF as solvent.

### Cartesian Coordinates of Optimised Structure

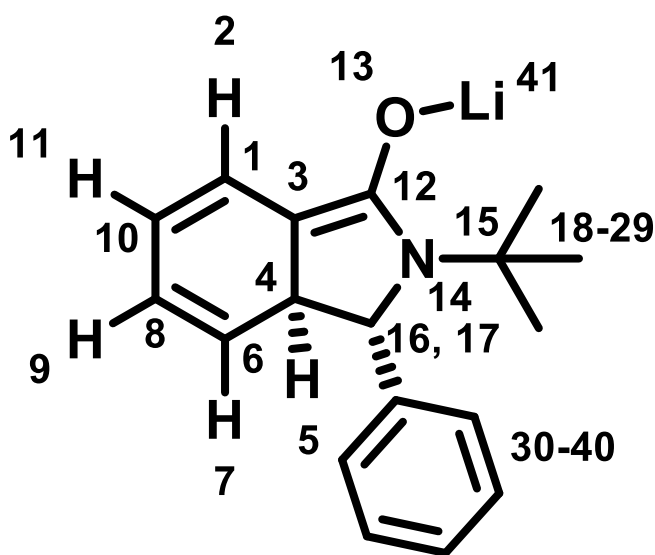

7

| Tag | Symbol | X          | Y          | Z          |
|-----|--------|------------|------------|------------|
| 1   | C      | -3.1034110 | -1.5153440 | -0.5790170 |
| 2   | H      | -4.0000200 | -1.0658490 | -1.0067870 |
| 3   | C      | -1.9312920 | -0.7477870 | -0.4228190 |
| 4   | C      | -0.6286430 | -1.4240440 | -0.0889220 |
| 5   | H      | -0.1441670 | -1.7987030 | -1.0162150 |
| 6   | C      | -0.8702700 | -2.5858350 | 0.8455920  |

<sup>7</sup>Frisch, M. J.; Trucks, G. W.; Schlegel, H. B.; Scuseria, G. E.; Robb, M. A.; Cheeseman, J. R.; Scalmani, G.; Barone, V.; Petersson, G. A.; Nakatsuji, H.; Li, X.; Caricato, M.; Marenich, A. V.; Bloino, J.; Janesko, B. G.; Gomperts, R.; Mennucci, B.; Hratchian, H. P.; Ortiz, J. V.; Izmaylov, A. F.; Sonnenberg, J. L.; Williams, J. L.; Ding, F.; Lipparini, F.; Egidi, F.; Goings, J.; Peng, B.; Petrone, A.; Henderson, T.; Ranasinghe, D.; Zakrzewski, V. G.; Gao, J.; Rega, N.; Zheng, G.; Liang, W.; Hada, M.; Ehara, M.; Toyota, K.; Fukuda, R.; Hasegawa, J.; Ishida, M.; Nakajima, T.; Honda, Y.; Kitao, O.; Nakai, H.; Vreven, T.; Throssell, K.; Montgomery Jr., J. A.; Peralta, J. E.; Ogliaro, F.; Bearpark, M. J.; Heyd, J. J.; Brothers, E. N.; Kudin, K. N.; Staroverov, V. N.; Keith, T. A.; Kobayashi, R.; Normand, J.; Raghavachari, K.; Rendell, A. P.; Burant, J. C.; Iyengar, S. S.; Tomasi, J.; Cossi, M.; Millam, J. M.; Klene, M.; Adamo, C.; Cammi, R.; Ochterski, J. W.; Martin, R. L.; Morokuma, K.; Farkas, O.; Foresman, J. B.; Fox, D. J. *Gaussian 16 Rev. C.01*, Wallingford, CT, 2016.

|    |    |            |            |            |
|----|----|------------|------------|------------|
| 7  | H  | -0.0838380 | -2.9158470 | 1.5220180  |
| 8  | C  | -2.0437770 | -3.2703660 | 0.7399130  |
| 9  | H  | -2.1958230 | -4.1656800 | 1.3419480  |
| 10 | C  | -3.1416040 | -2.8111160 | -0.0885310 |
| 11 | H  | -4.0427030 | -3.4120360 | -0.1685380 |
| 12 | C  | -1.7318110 | 0.6348070  | -0.5121380 |
| 13 | O  | -2.5684210 | 1.5307190  | -0.8866810 |
| 14 | N  | -0.4061030 | 0.9681140  | -0.1299630 |
| 15 | C  | -0.1430150 | 2.3175950  | 0.4874950  |
| 16 | C  | 0.2496590  | -0.2435130 | 0.4315210  |
| 17 | H  | 0.1798910  | -0.2230750 | 1.5318700  |
| 18 | C  | -1.1216400 | 2.5745380  | 1.6560800  |
| 19 | H  | -0.9014510 | 3.5385080  | 2.1278760  |
| 20 | H  | -2.1561920 | 2.5889470  | 1.3067590  |
| 21 | H  | -1.0225560 | 1.7971530  | 2.4223970  |
| 22 | C  | -0.2826450 | 3.4120140  | -0.5910410 |
| 23 | H  | -1.2906710 | 3.4341030  | -1.0031190 |
| 24 | H  | -0.0532330 | 4.3903720  | -0.1531590 |
| 25 | H  | 0.4255930  | 3.2299410  | -1.4068880 |
| 26 | C  | 1.2930380  | 2.4040470  | 1.0380430  |
| 27 | H  | 1.4397010  | 3.4094540  | 1.4454500  |
| 28 | H  | 1.4791910  | 1.6927900  | 1.8467380  |
| 29 | H  | 2.0397360  | 2.2433700  | 0.2571560  |
| 30 | C  | 1.7055120  | -0.4388590 | 0.0404400  |
| 31 | C  | 2.6159170  | -0.9560080 | 0.9721610  |
| 32 | C  | 2.1525170  | -0.2015160 | -1.2683780 |
| 33 | C  | 3.9402070  | -1.2284650 | 0.6115060  |
| 34 | H  | 2.2893300  | -1.1405580 | 1.9930570  |
| 35 | C  | 3.4748430  | -0.4666820 | -1.6326300 |
| 36 | H  | 1.4598100  | 0.2050160  | -1.9992900 |
| 37 | C  | 4.3760140  | -0.9825440 | -0.6935730 |
| 38 | H  | 4.6293460  | -1.6269960 | 1.3510510  |
| 39 | H  | 3.8030410  | -0.2700330 | -2.6497990 |
| 40 | H  | 5.4046990  | -1.1874560 | -0.9760870 |
| 41 | Li | -4.2423990 | 1.8094970  | -1.4791560 |

**TDDFT UV-Vis Prediction Data**

| Transition            | Wavelength (nm) | Energy (eV) | Oscillator Strength |
|-----------------------|-----------------|-------------|---------------------|
| $S_0 \rightarrow S_1$ | 415.00          | 2.9875      | 0.2465              |
| $S_0 \rightarrow S_2$ | 357.99          | 3.4634      | 0.0048              |
| $S_0 \rightarrow S_3$ | 315.33          | 3.9319      | 0.0160              |
| $S_0 \rightarrow S_4$ | 306.60          | 4.0438      | 0.0045              |

**Copies of  $^1\text{H}$ ,  $^{13}\text{C}$  NMR spectra (all in  $\text{CDCl}_3$ ) and HPLC traces**

<sup>1</sup>H NMR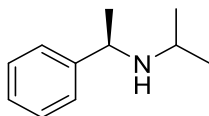

**(R)-N-(1-Phenylethyl)-1-methylethylamine (1c)**

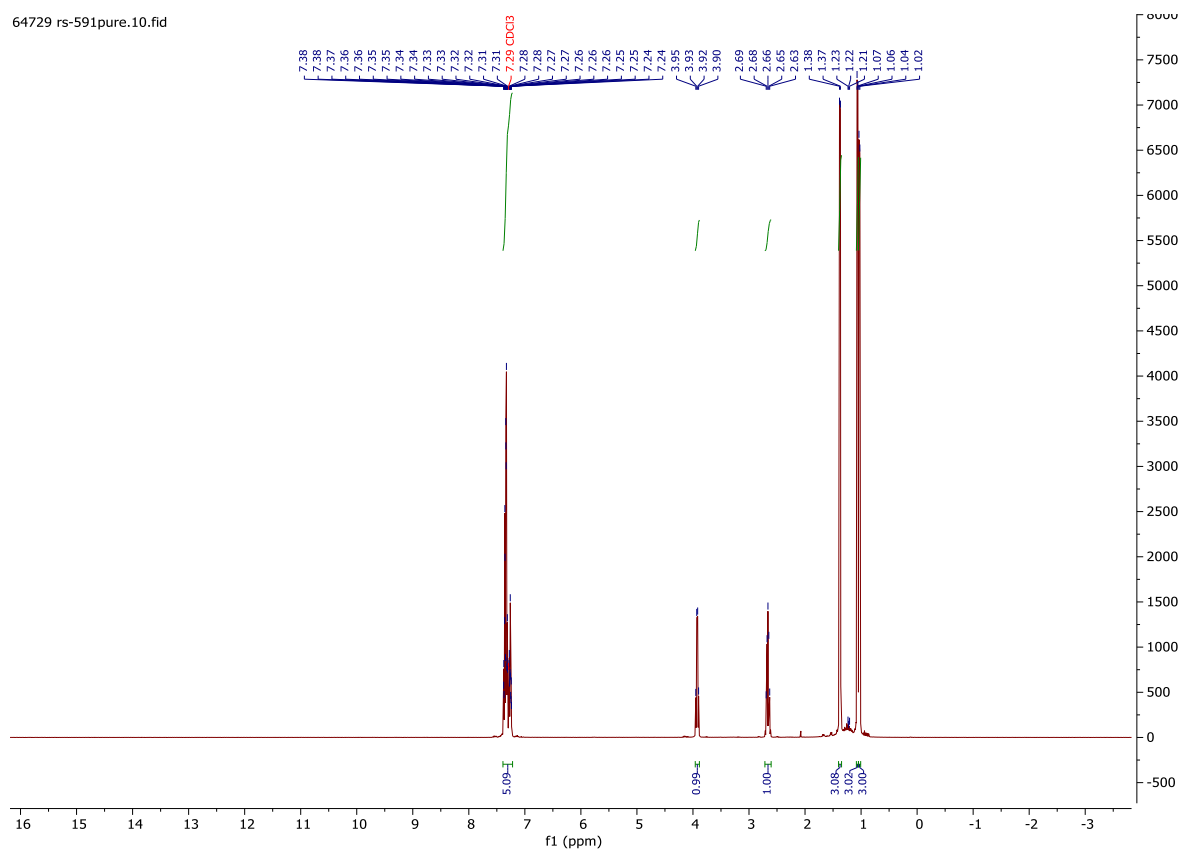

<sup>13</sup>C NMR

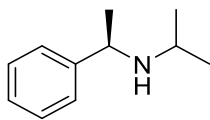

**(*R*)-*N*-(1-Phenylethyl)-1-methylethylamine (1c)**

64729 rs-591pure.11.fid

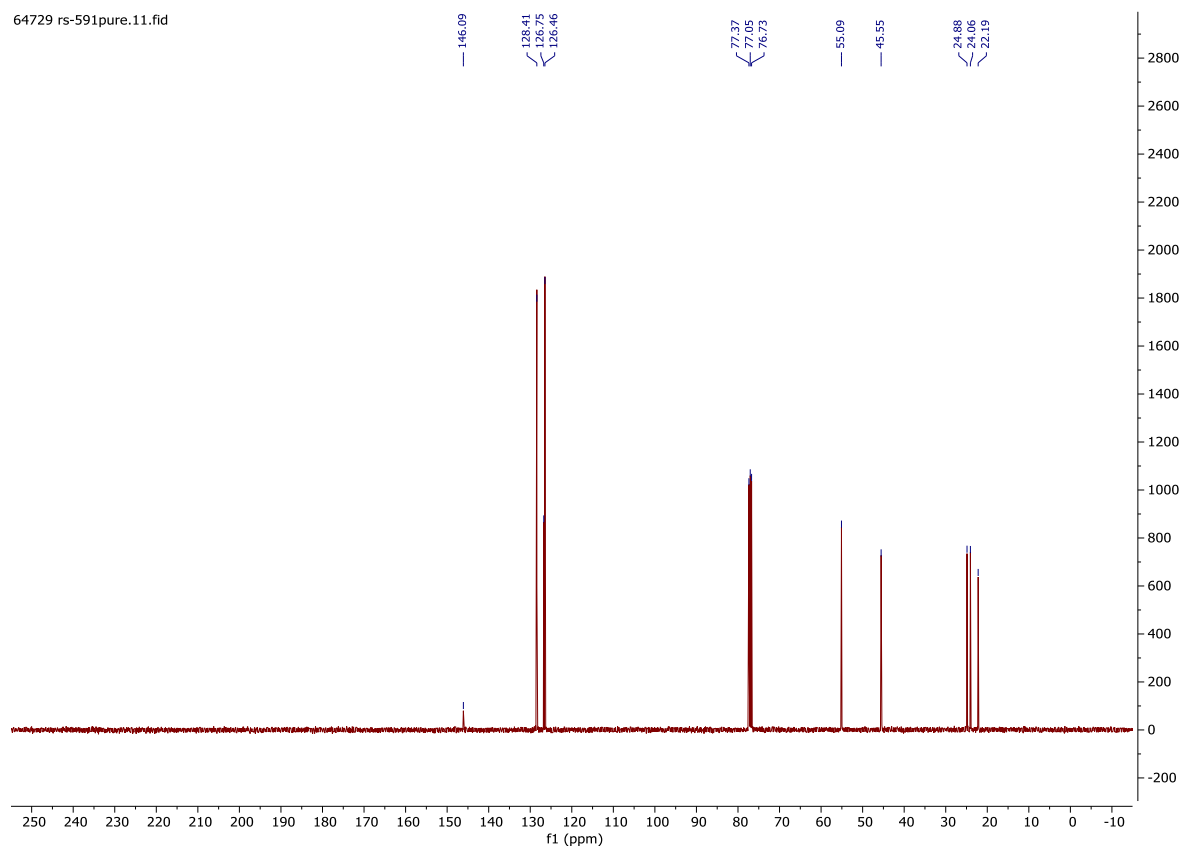

# <sup>1</sup>H NMR

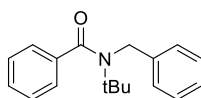

## *N*-benzyl-*N*-(tert-butyl)benzamide (2a)

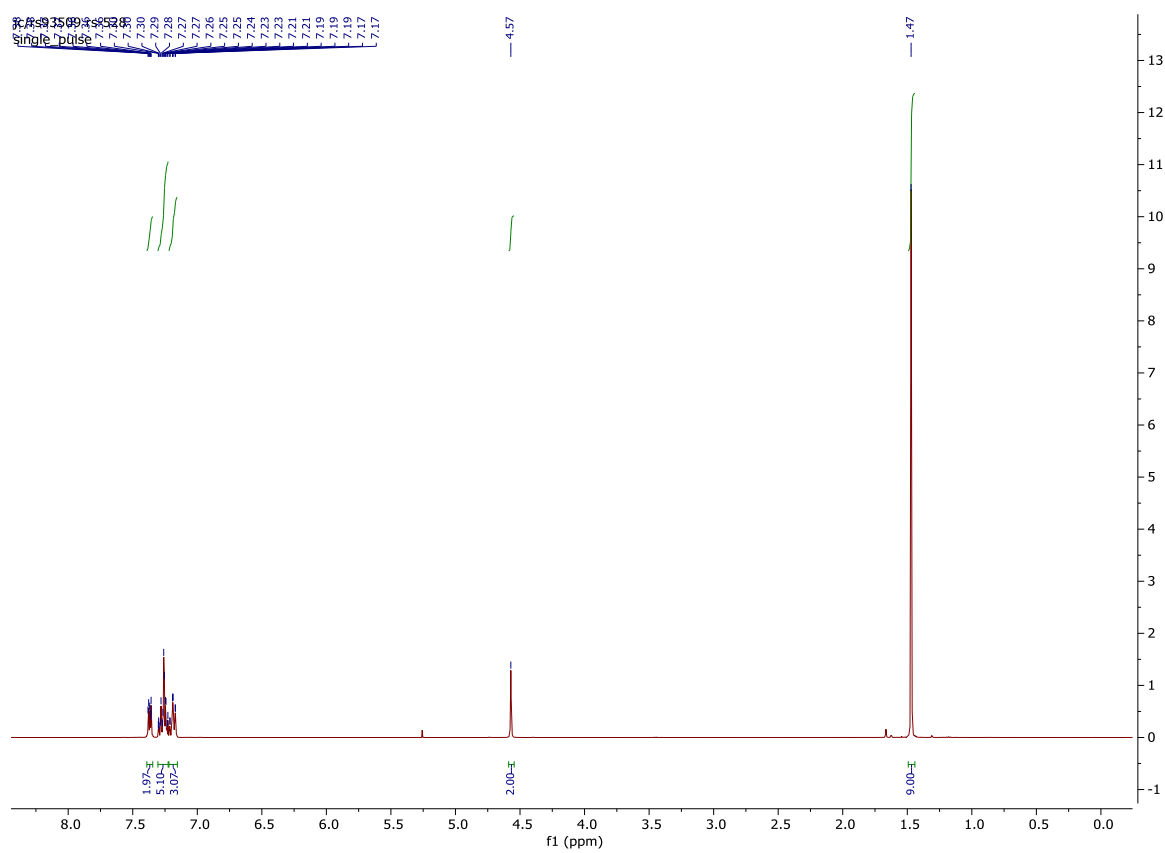

# <sup>13</sup>C NMR



## *N*-benzyl-*N*-(tert-butyl)benzamide (2a)

jc/rs93509 rs-528  
single pulse decoupled gated NOE

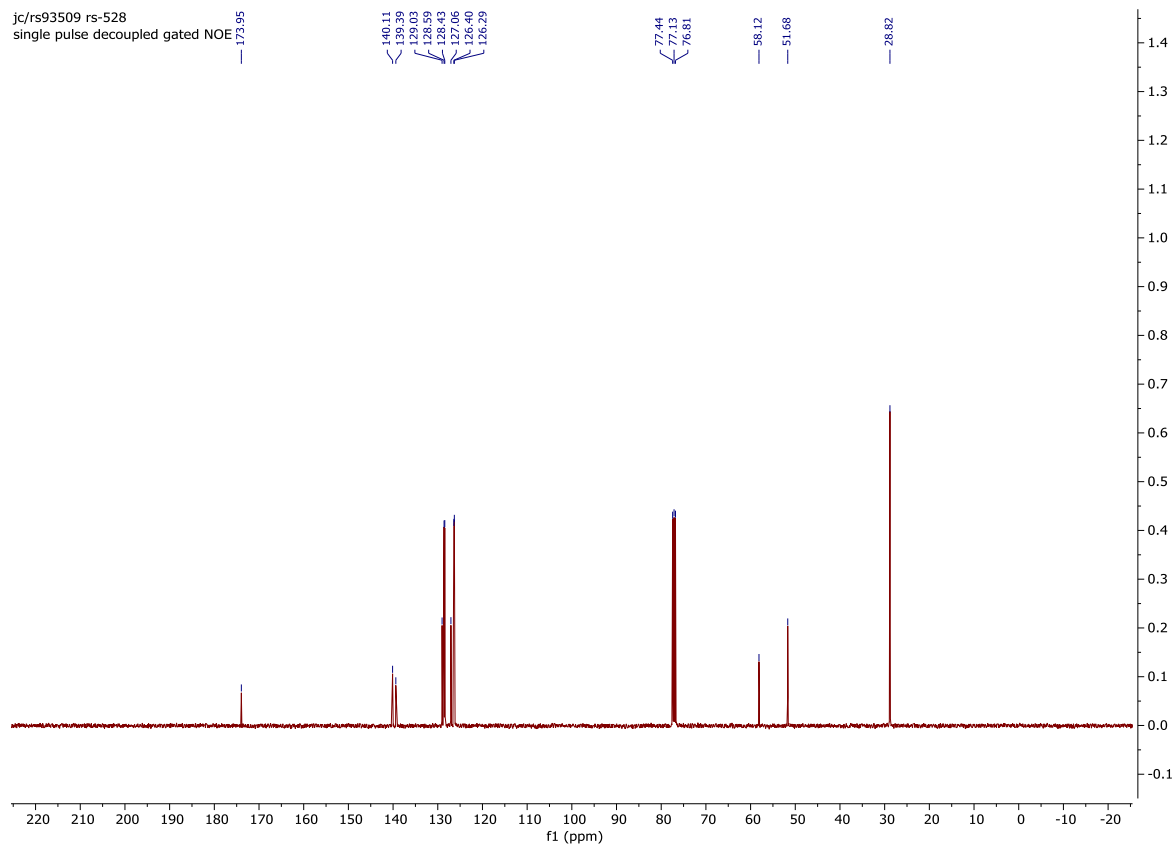



# <sup>1</sup>H NMR

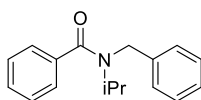

## *N*-benzyl-*N*-isopropylbenzamide (2a')

jc/rs2301 rs-690rept2  
single\_pulse

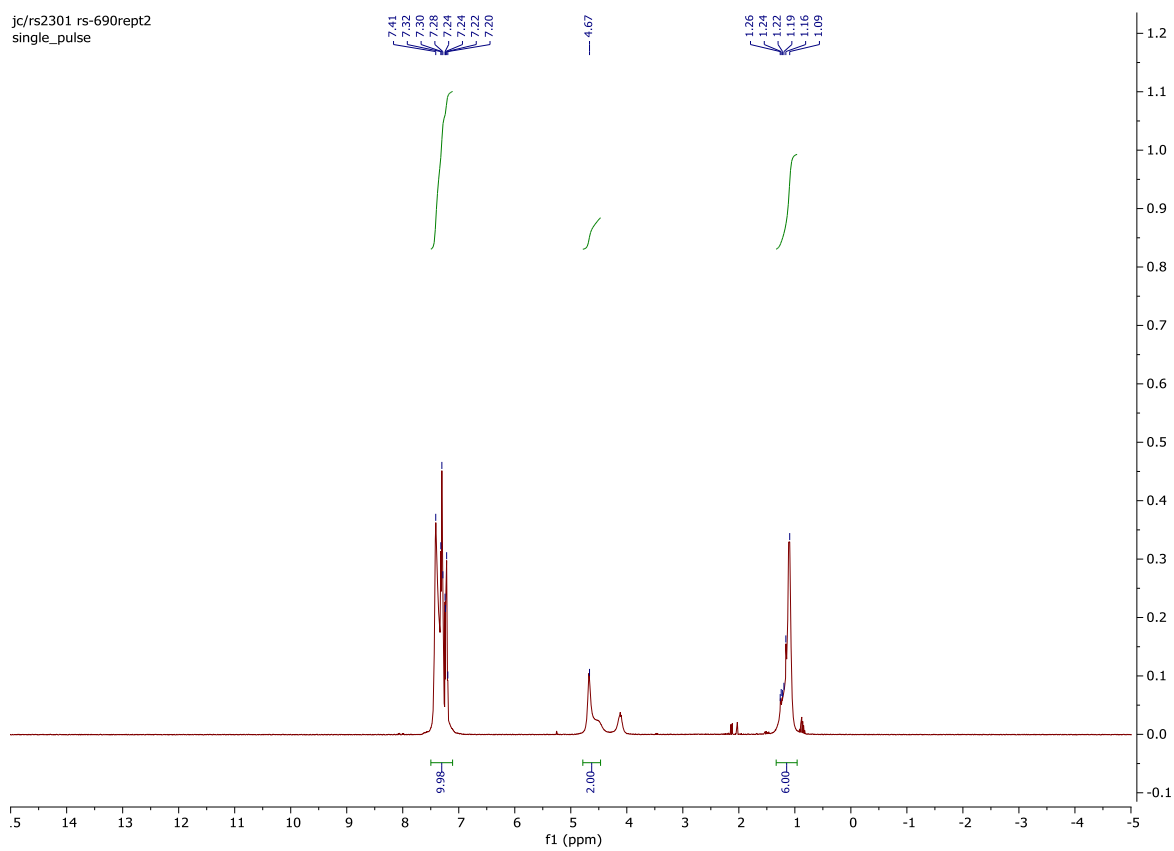

<sup>13</sup>C NMR

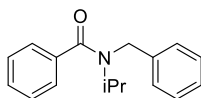

*N*-benzyl-*N*-isopropylbenzamide (2a')

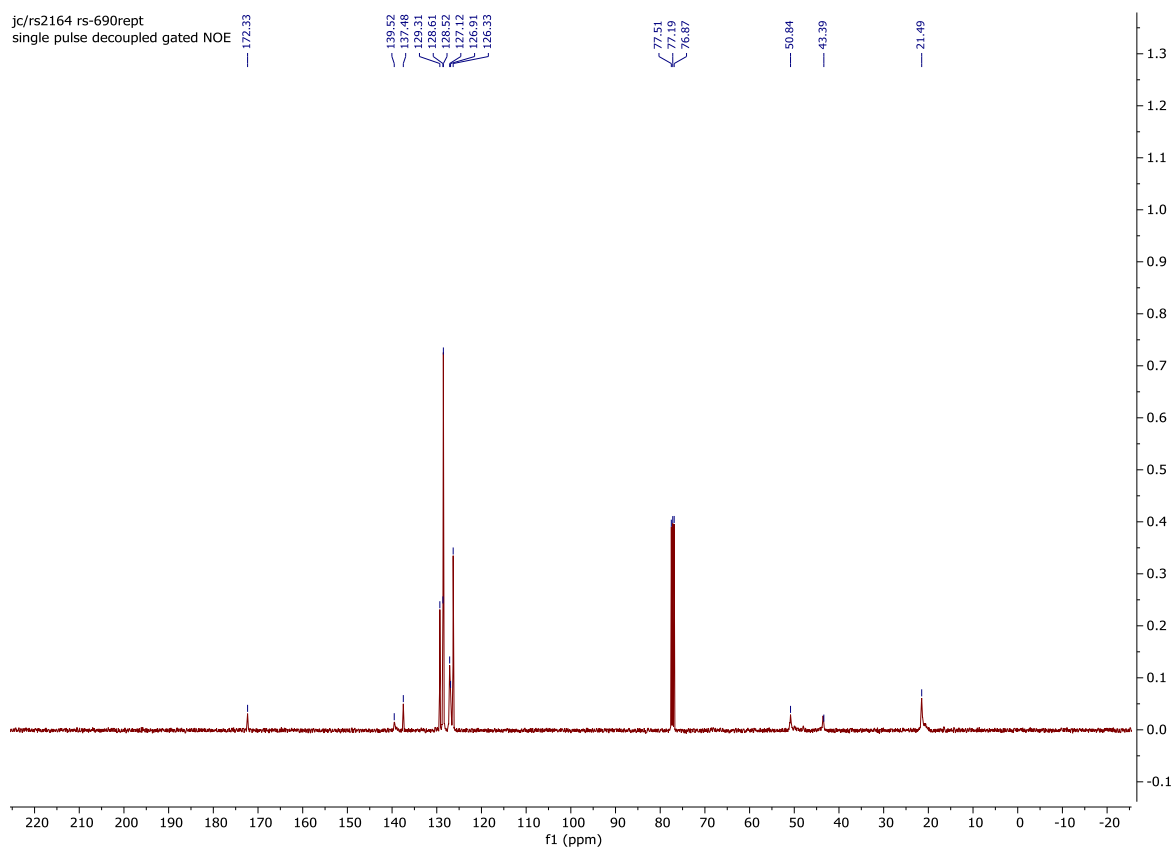

# <sup>1</sup>H NMR

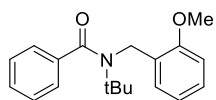

*N*-(tert-butyl)-*N*-(2-methoxybenzyl)benzamide (2b)

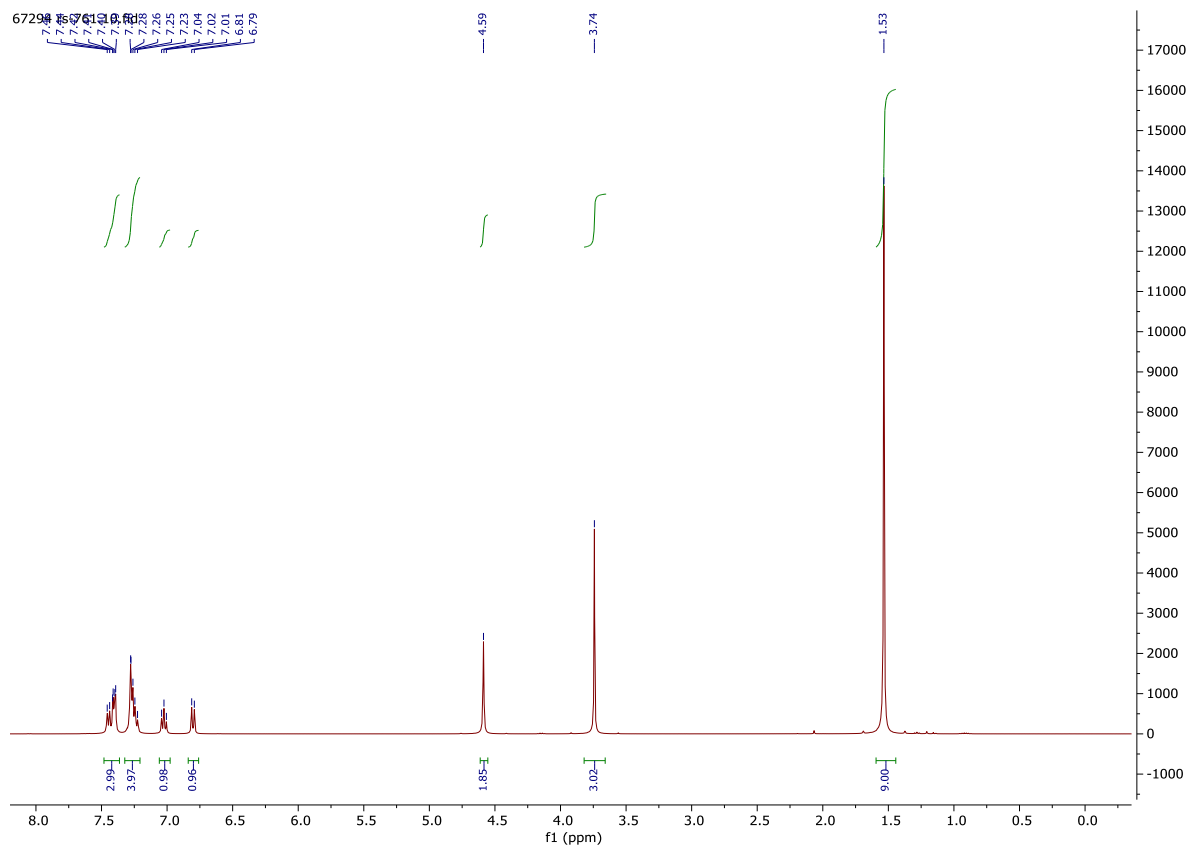

<sup>13</sup>C NMR

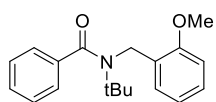

*N*-(*tert*-butyl)-*N*-(2-methoxybenzyl)benzamide (2b)

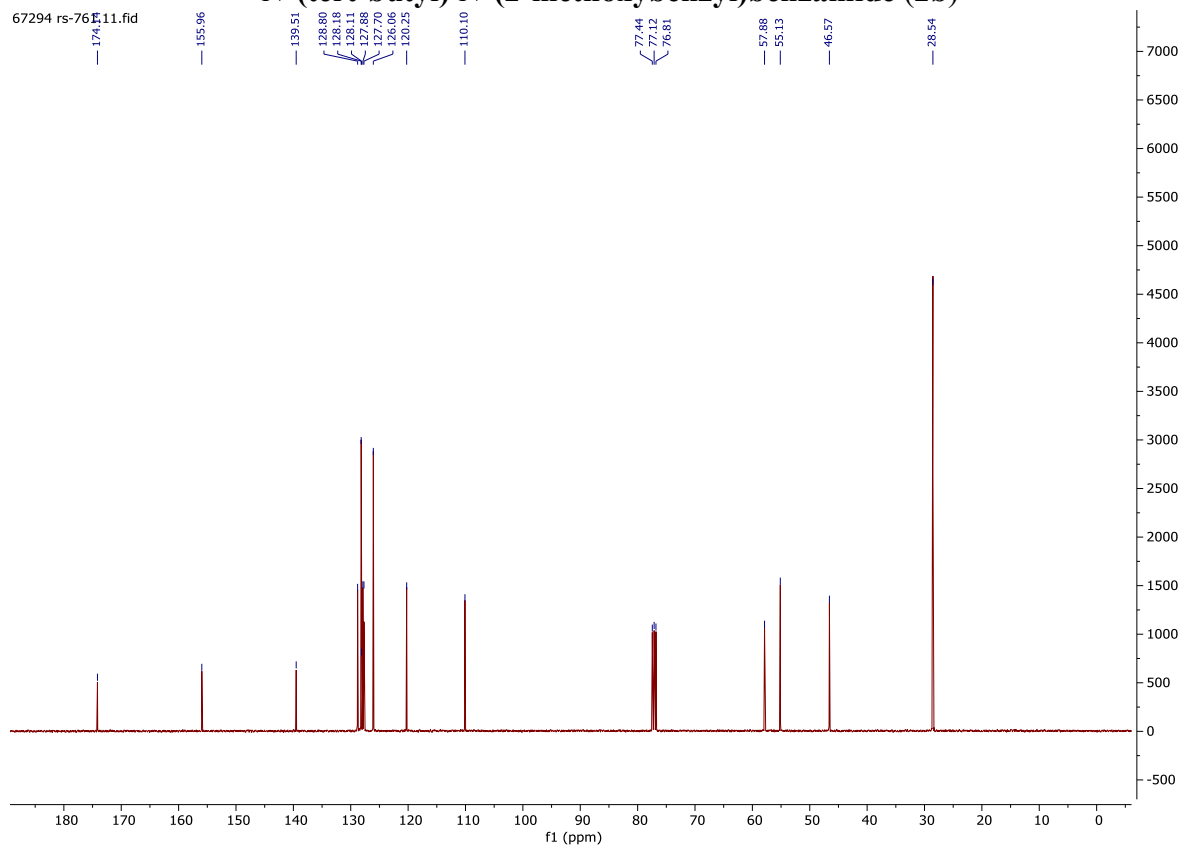

<sup>1</sup>H NMR

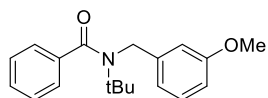

*N*-(tert-butyl)-*N*-(3-methoxybenzyl)benzamide (2c)

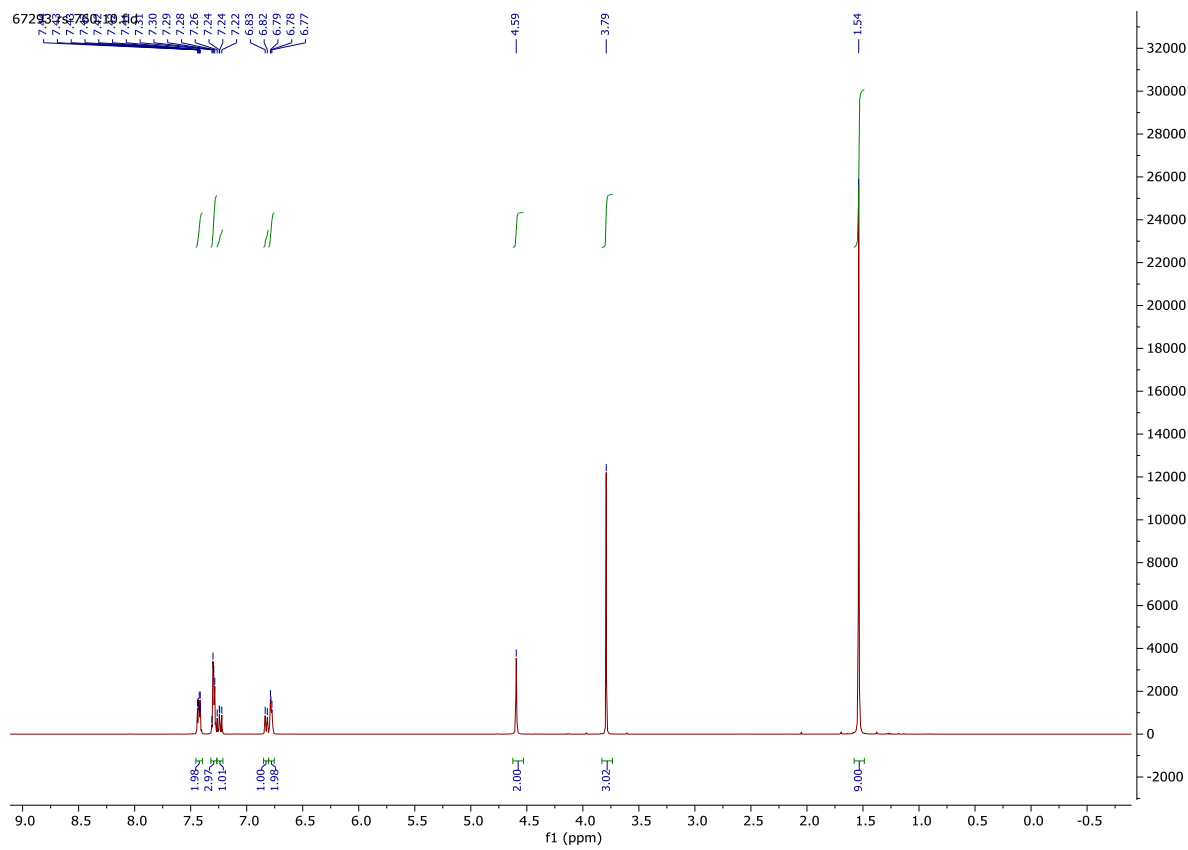

<sup>13</sup>C NMR

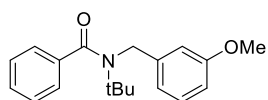

*N*-(tert-butyl)-*N*-(3-methoxybenzyl)benzamide (2c)

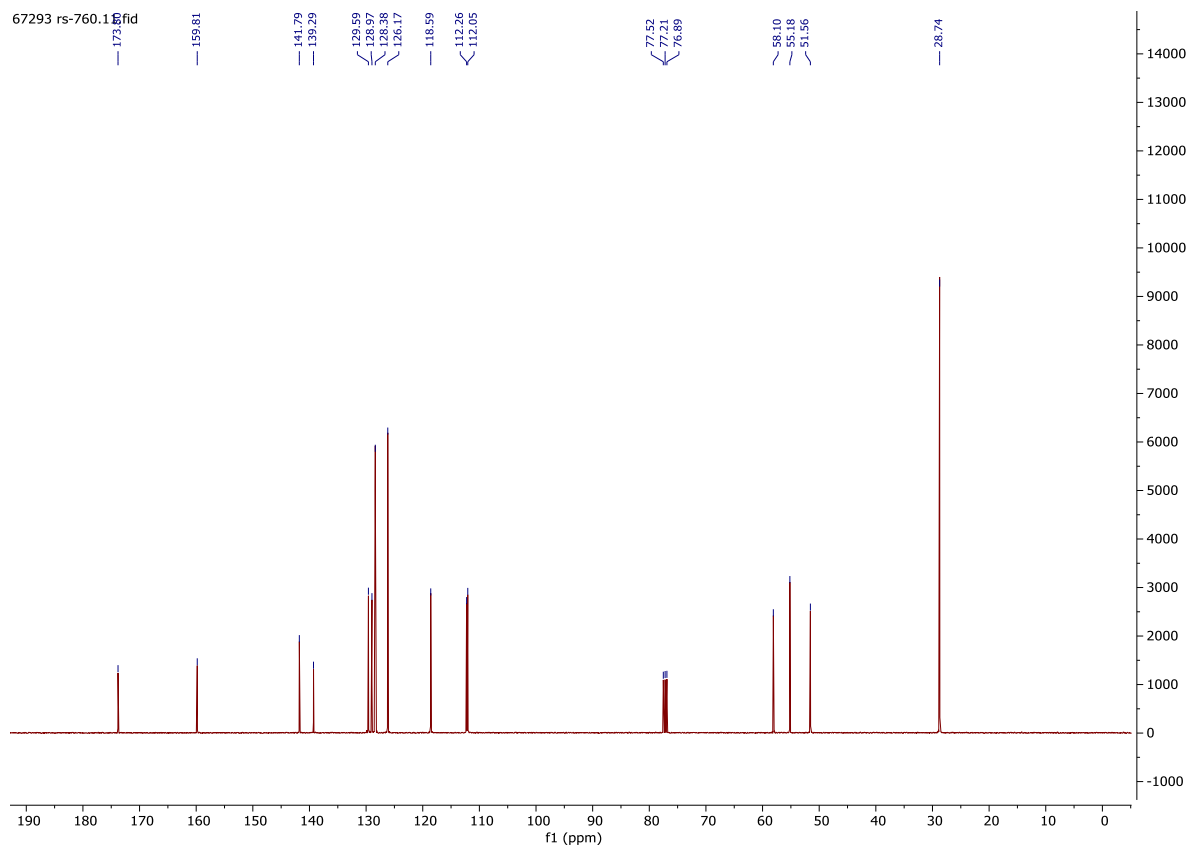

# <sup>1</sup>H NMR

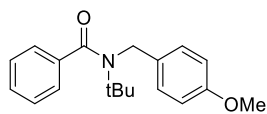

***N*-(*tert*-butyl)-*N*-(4-methoxybenzyl)benzamide (2d)**

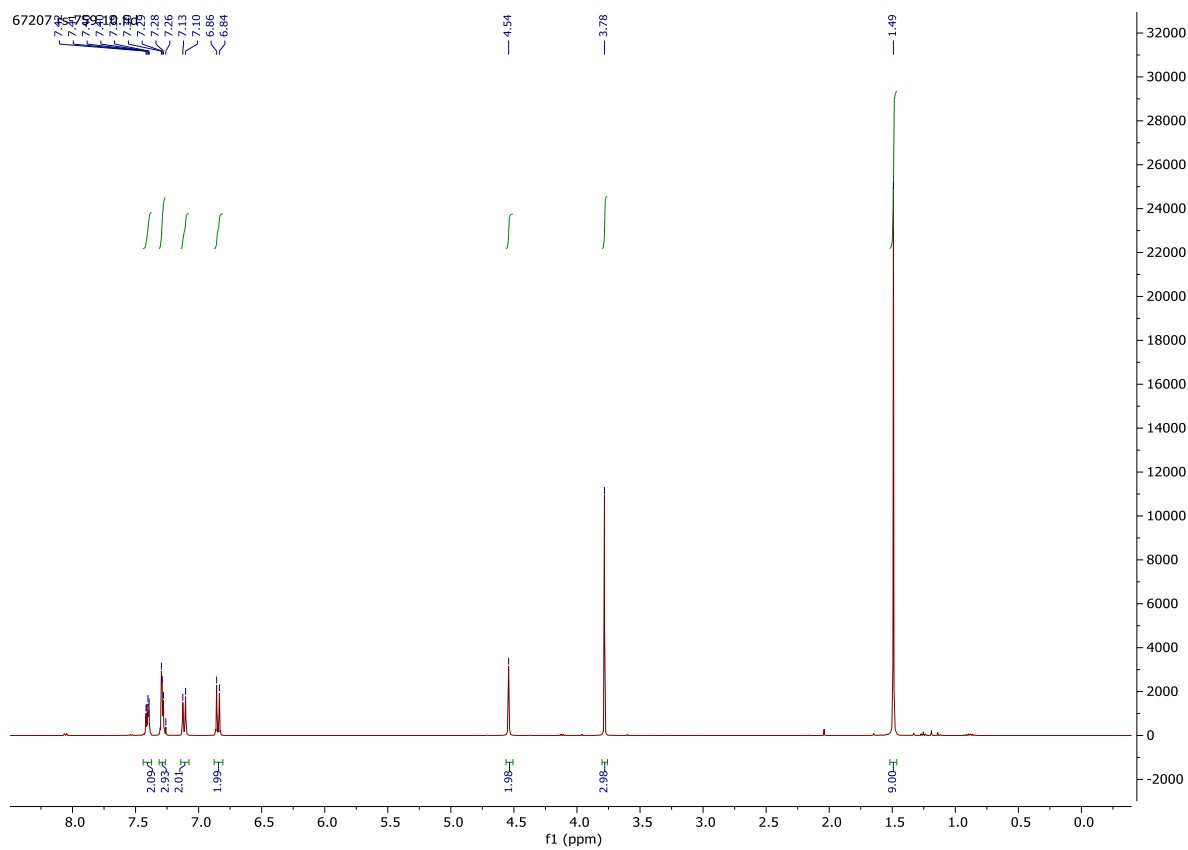

<sup>13</sup>C NMR



***N*-(*tert*-butyl)-*N*-(4-methoxybenzyl)benzamide (2d)**

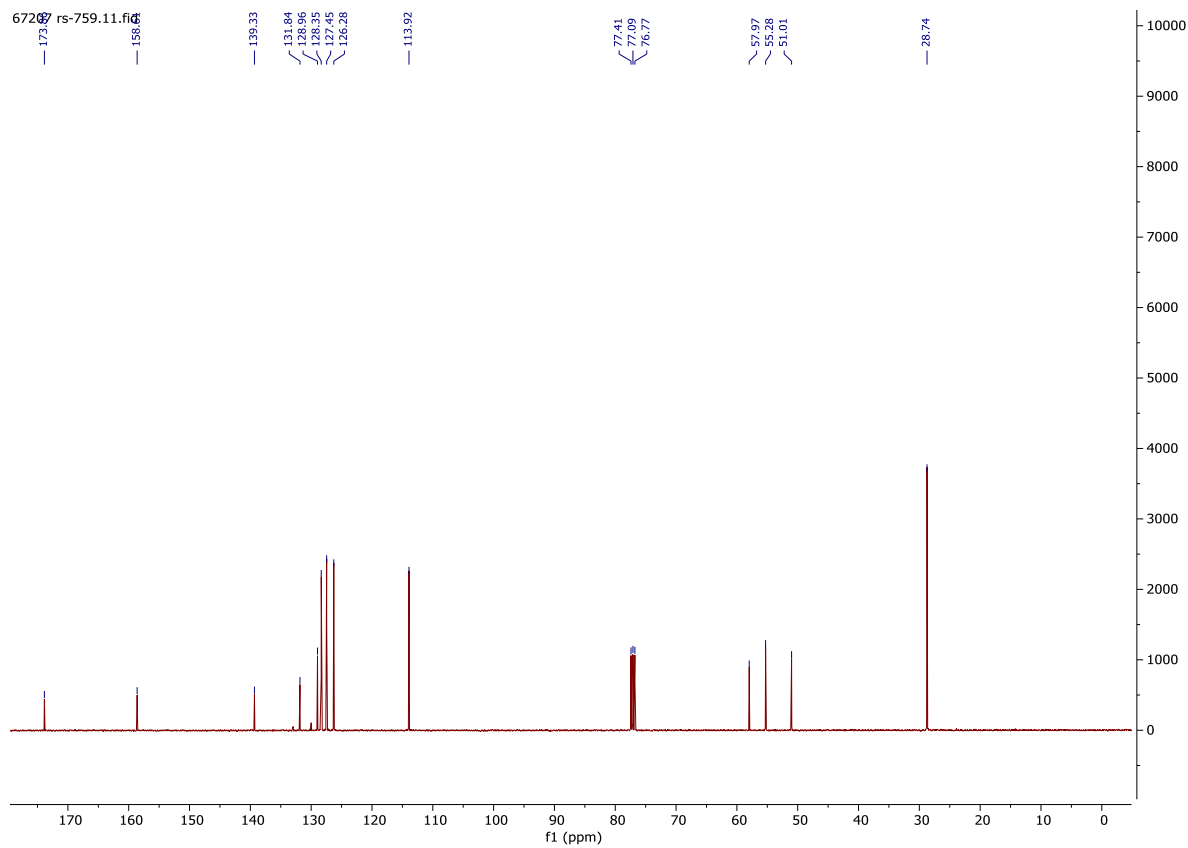



CC(C)N(Cc1ccc(C)cc1)C(=O)c2ccccc2

<sup>13</sup>C NMR

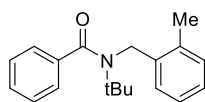

***N*-(*tert*-butyl)-*N*-(2-methylbenzyl)benzamide (2e)**

jc/rs99583 rs-795rept  
single pulse decoupled gated NOE

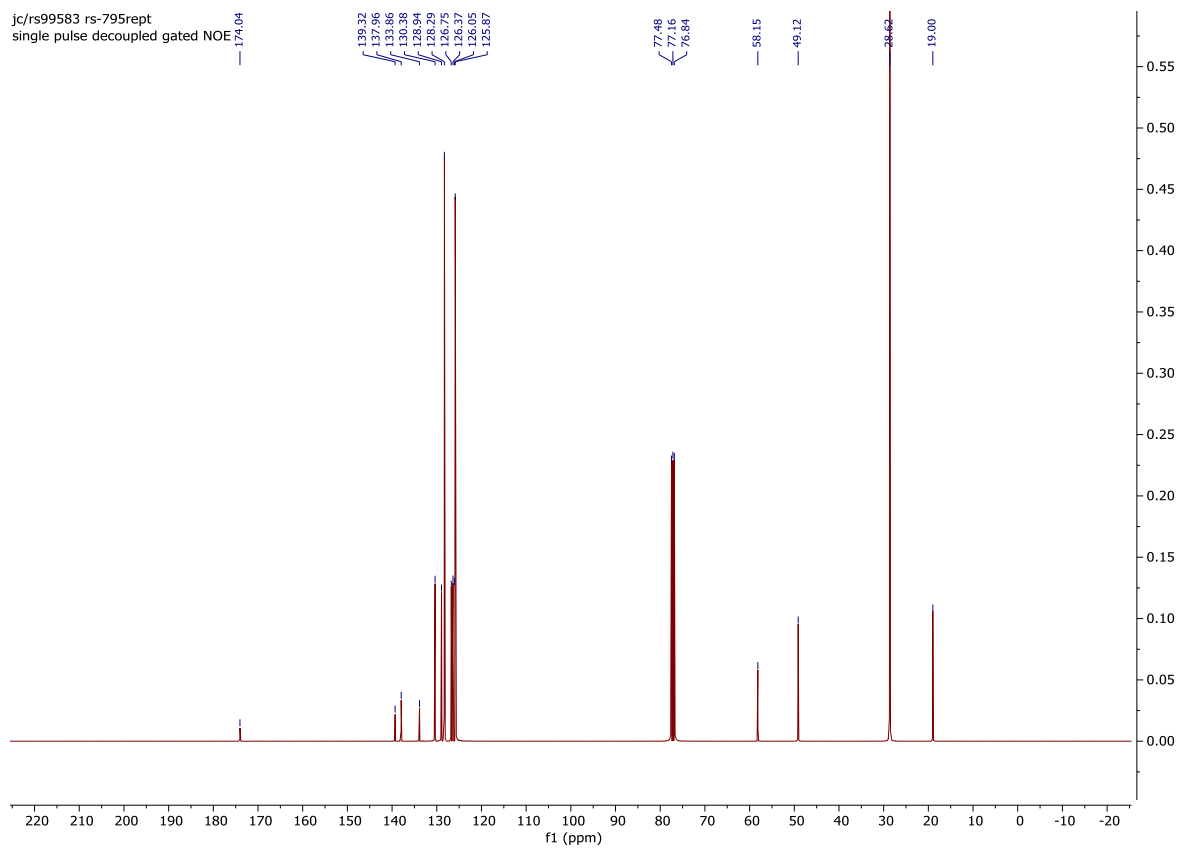

# <sup>1</sup>H NMR

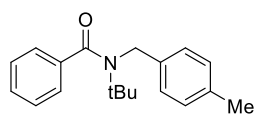

***N*-(tert-butyl)-*N*-(4-methylbenzyl)benzamide (2f)**

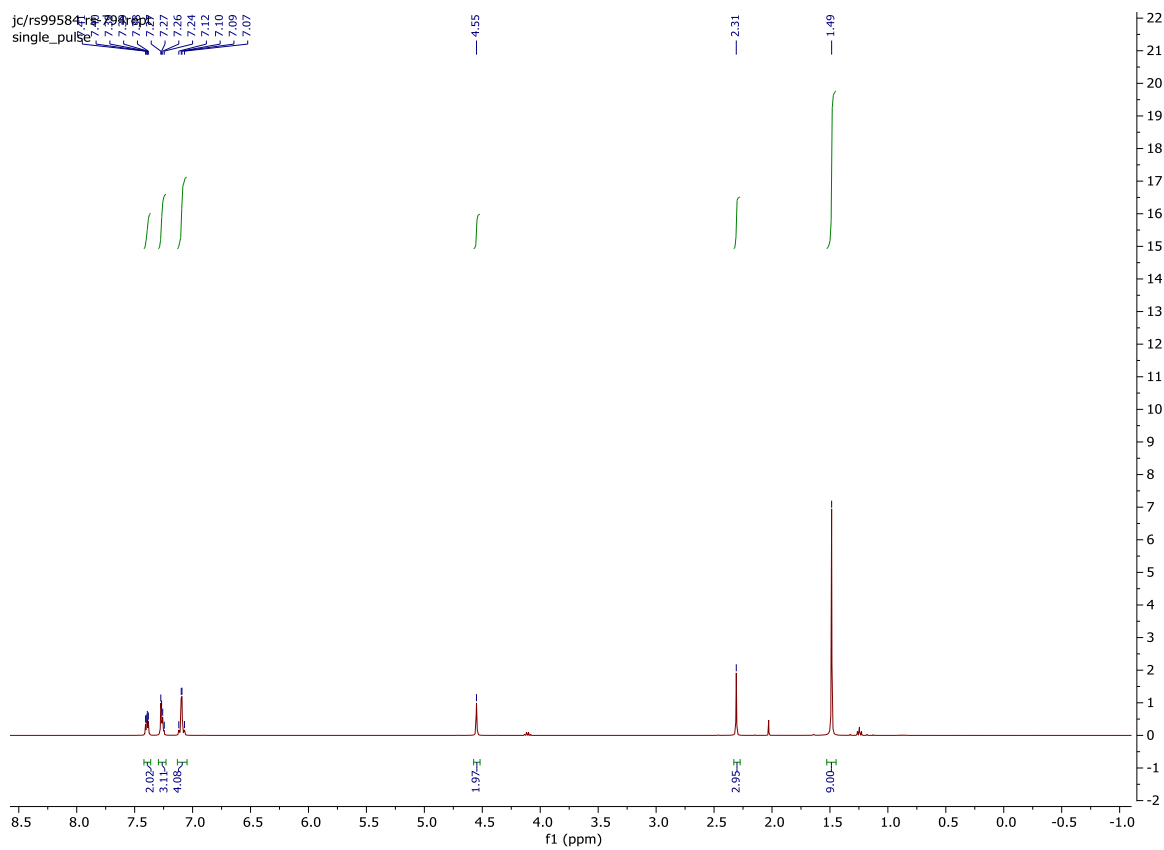

<sup>13</sup>C NMR



***N*-(*tert*-butyl)-*N*-(4-methylbenzyl)benzamide (2f)**

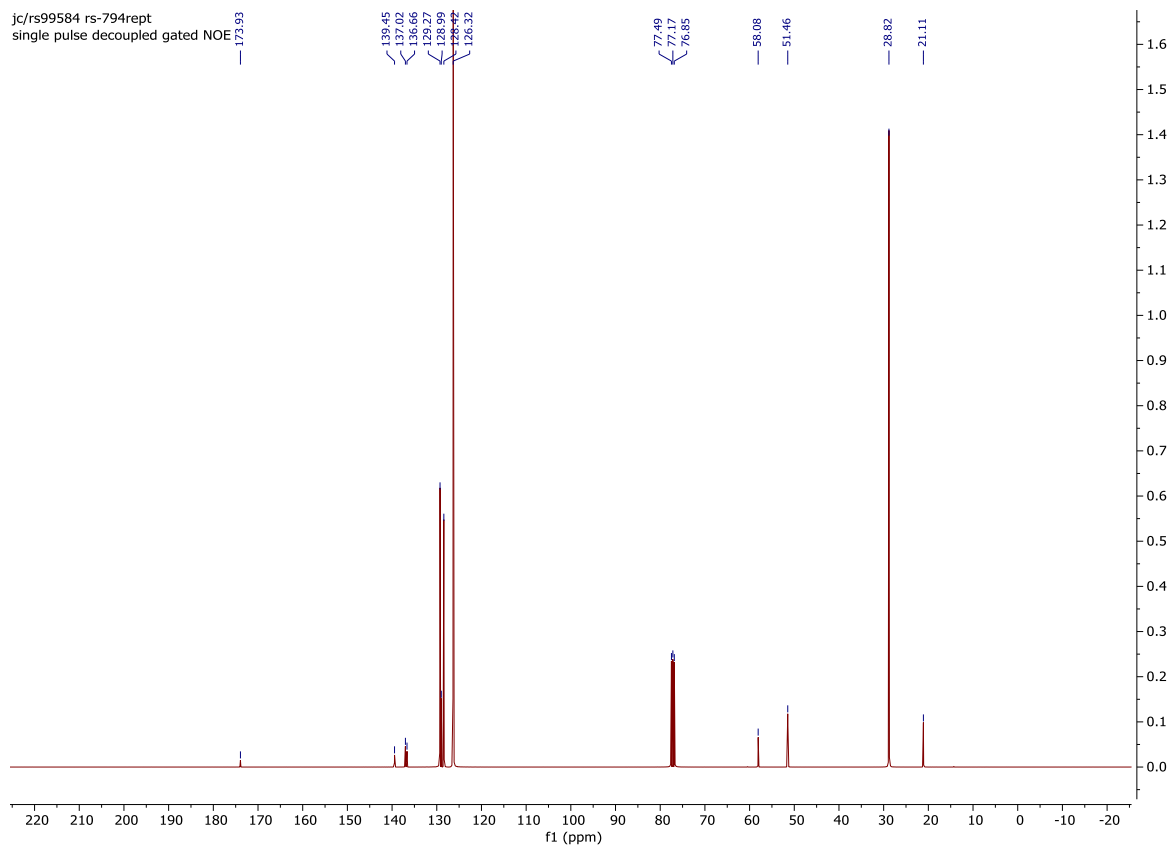

CC(C)(C)N(C(=O)c1ccccc1)Cc2cc3ccccc3cc2OC

<sup>13</sup>C NMR

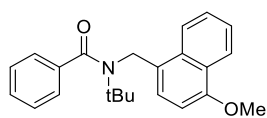

*N*-(tert-butyl)-*N*-((4-methoxynaphthalen-1-yl)methyl)benzamide (2g)

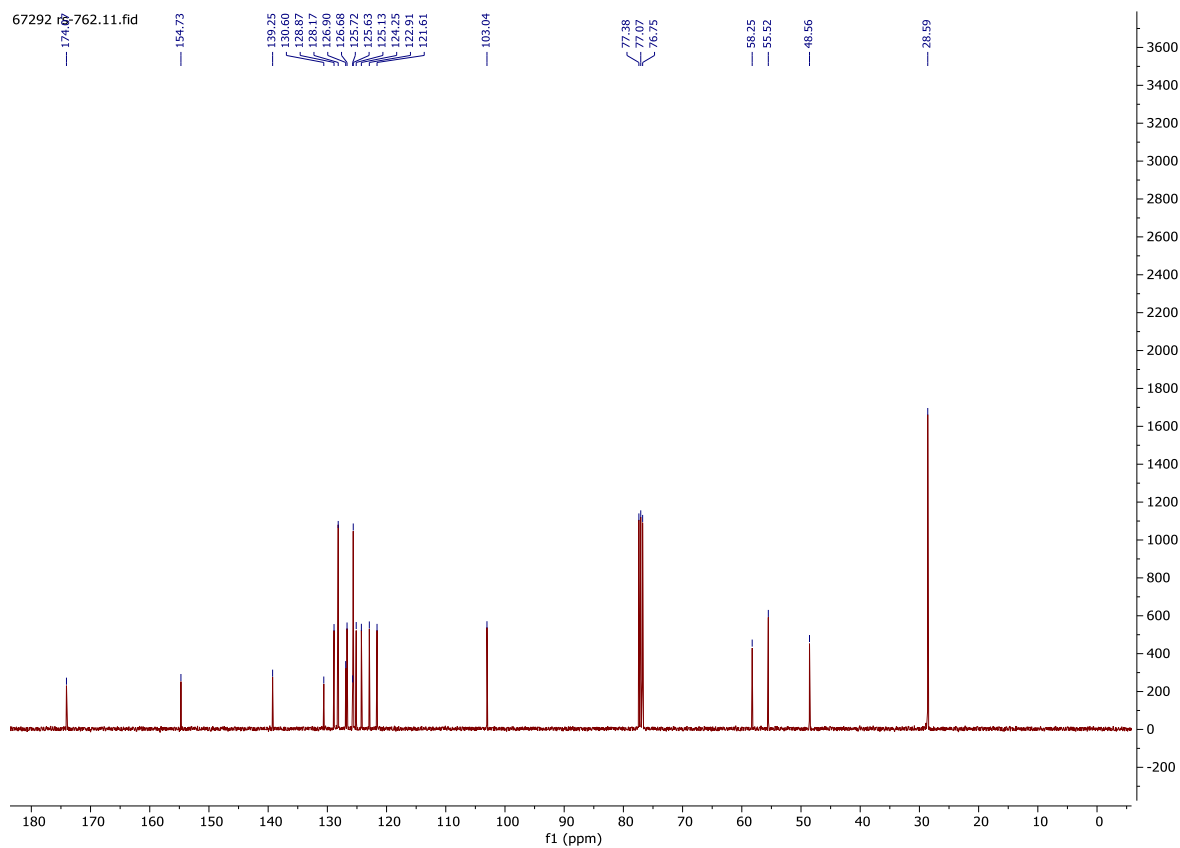

# <sup>1</sup>H NMR

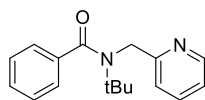

***N*-(tert-butyl)-*N*-(pyridin-2-ylmethyl)benzamide (2h)**

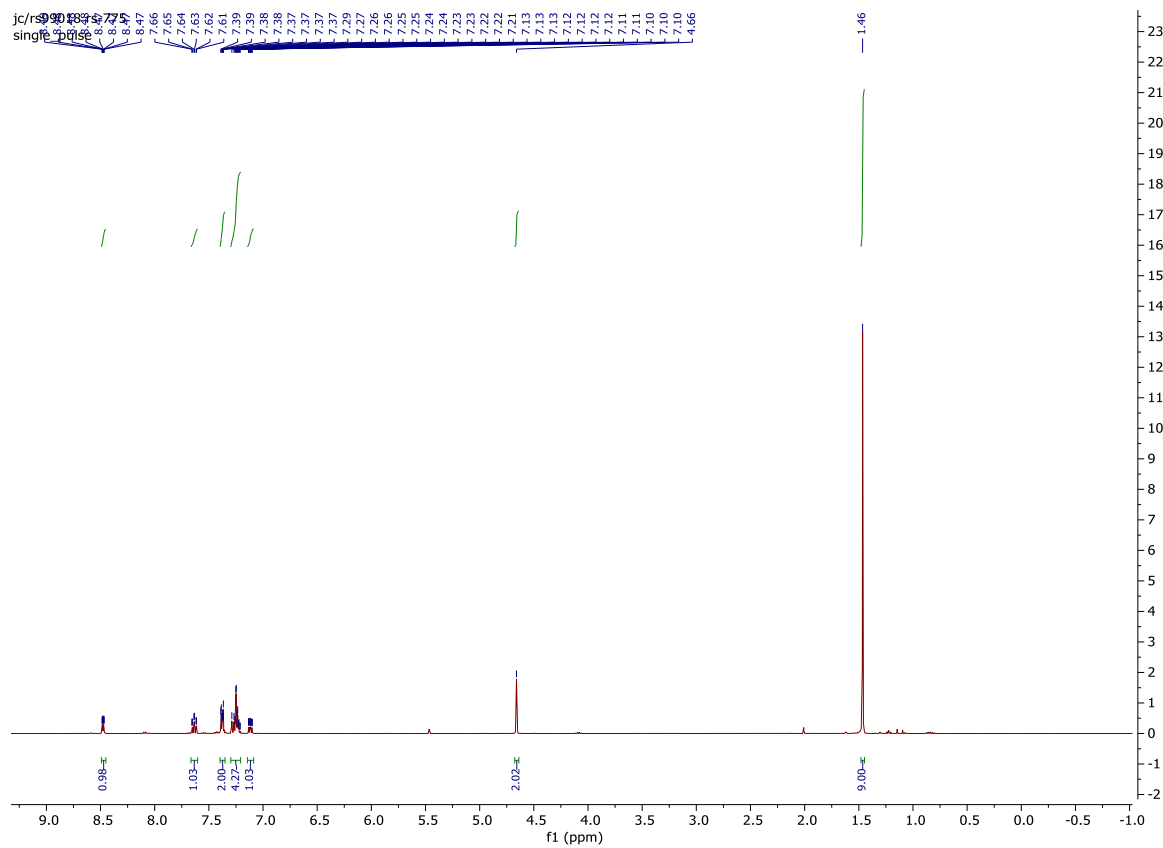

<sup>13</sup>C NMR

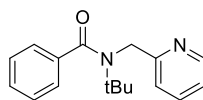

***N*-(tert-butyl)-*N*-(pyridin-2-ylmethyl)benzamide (2h)**

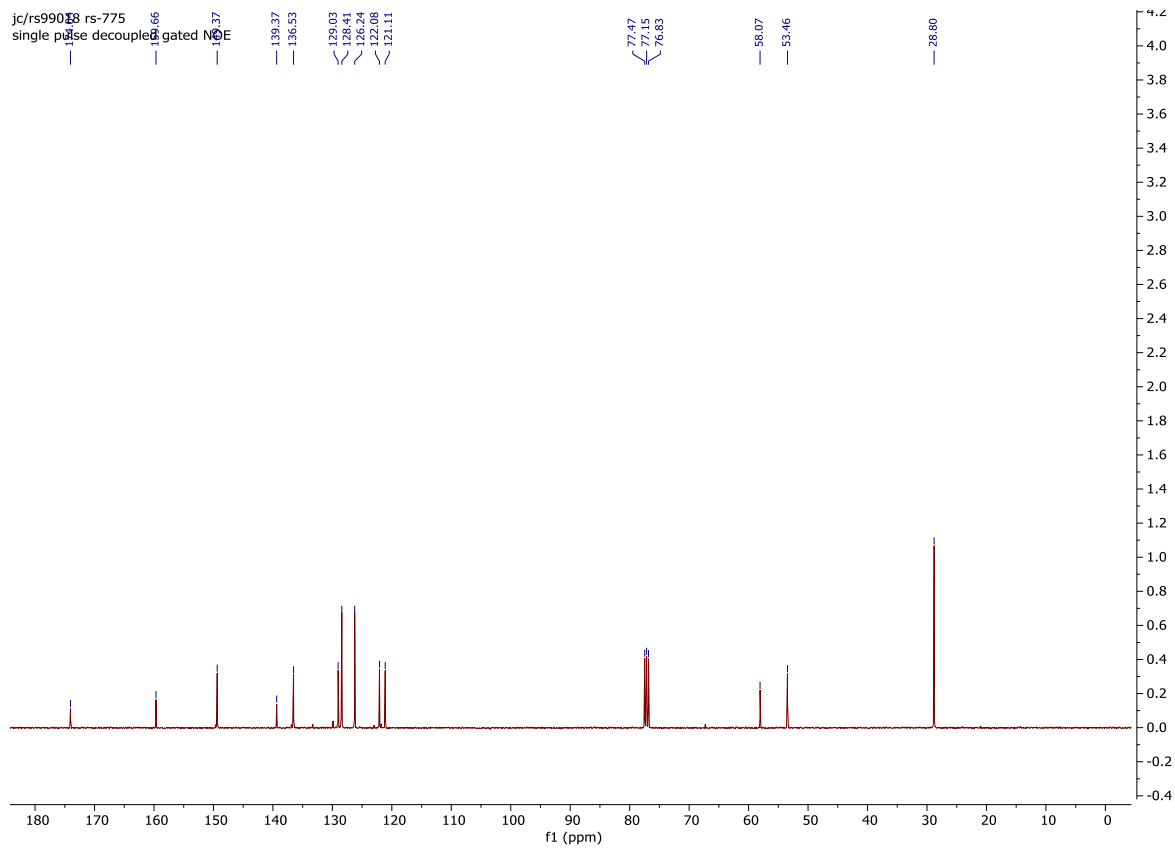



# <sup>1</sup>H NMR

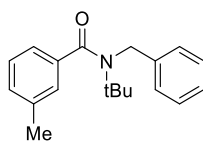

## *N*-benzyl-*N*-(tert-butyl)-3-methylbenzamide (2i)

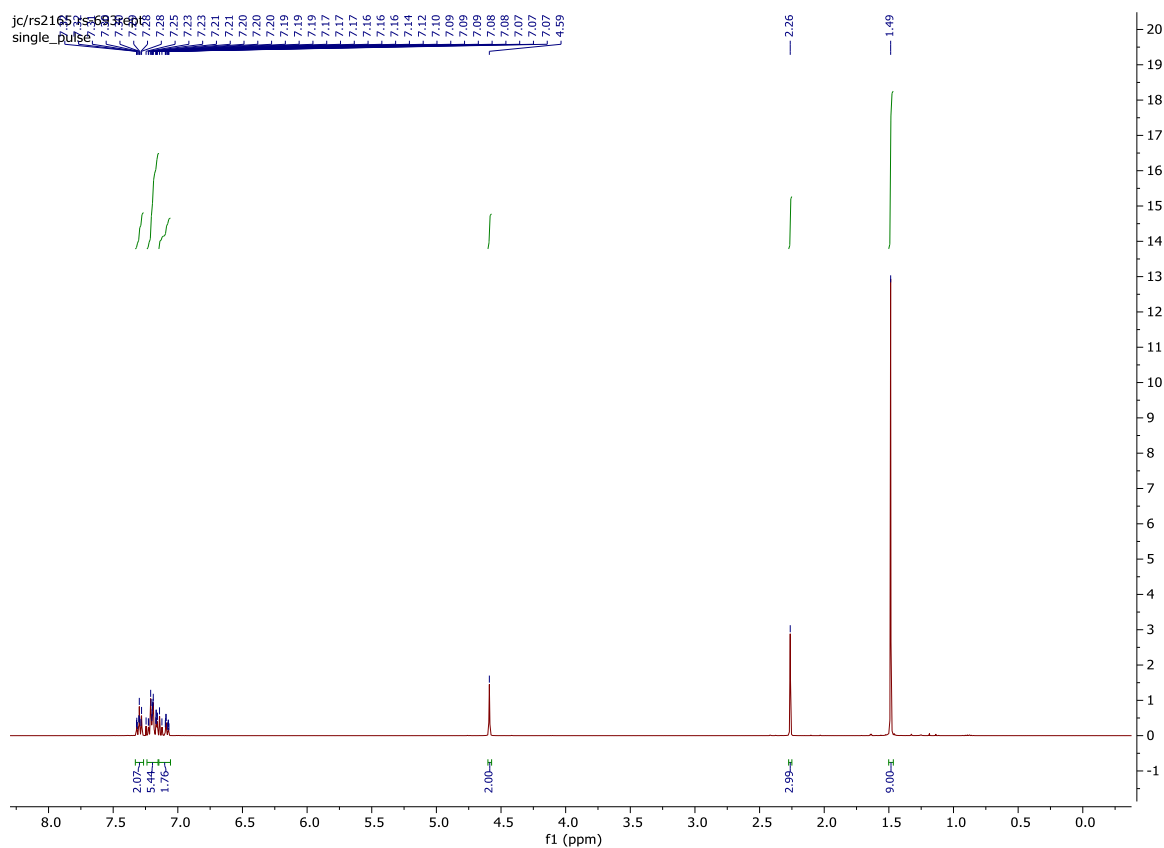

# <sup>13</sup>C NMR

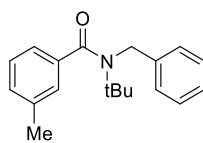

## *N*-benzyl-*N*-(tert-butyl)-3-methylbenzamide (2i)

jc/rs2165 rs-693rept  
single pulse decoupled gated NOE

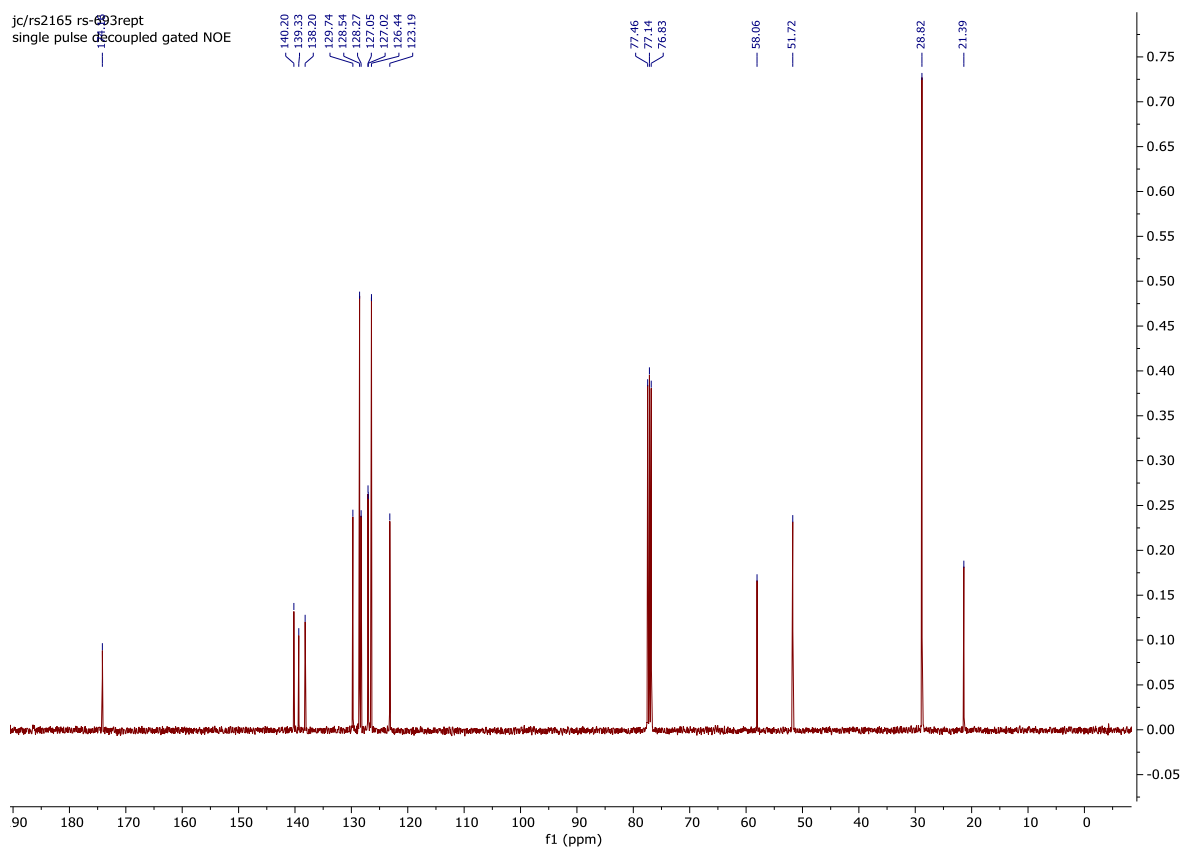

# <sup>1</sup>H NMR

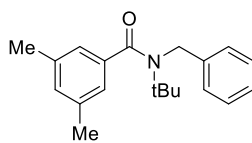

*N*-benzyl-*N*-(tert-butyl)-3,5-dimethylbenzamide (2j)

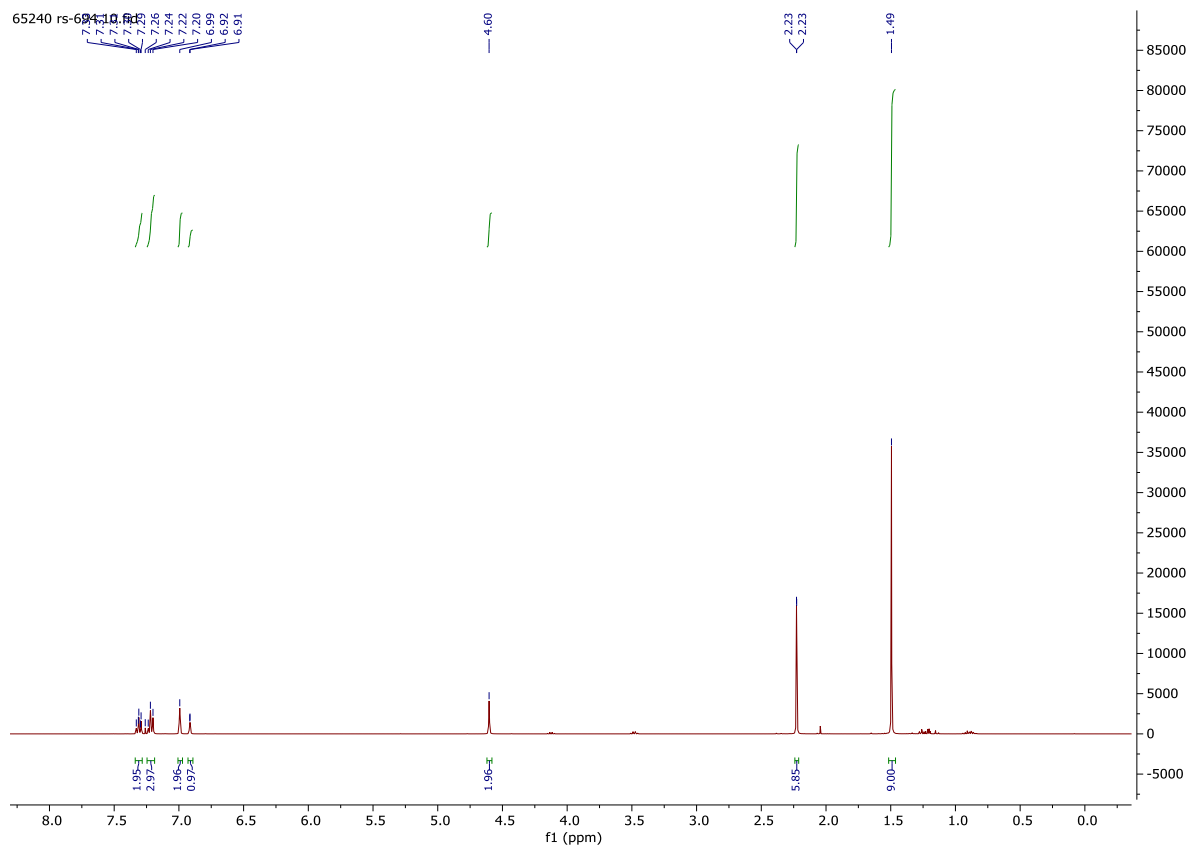

<sup>13</sup>C NMR

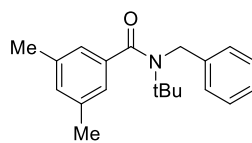

***N*-benzyl-*N*-(*tert*-butyl)-3,5-dimethylbenzamide (2j)**

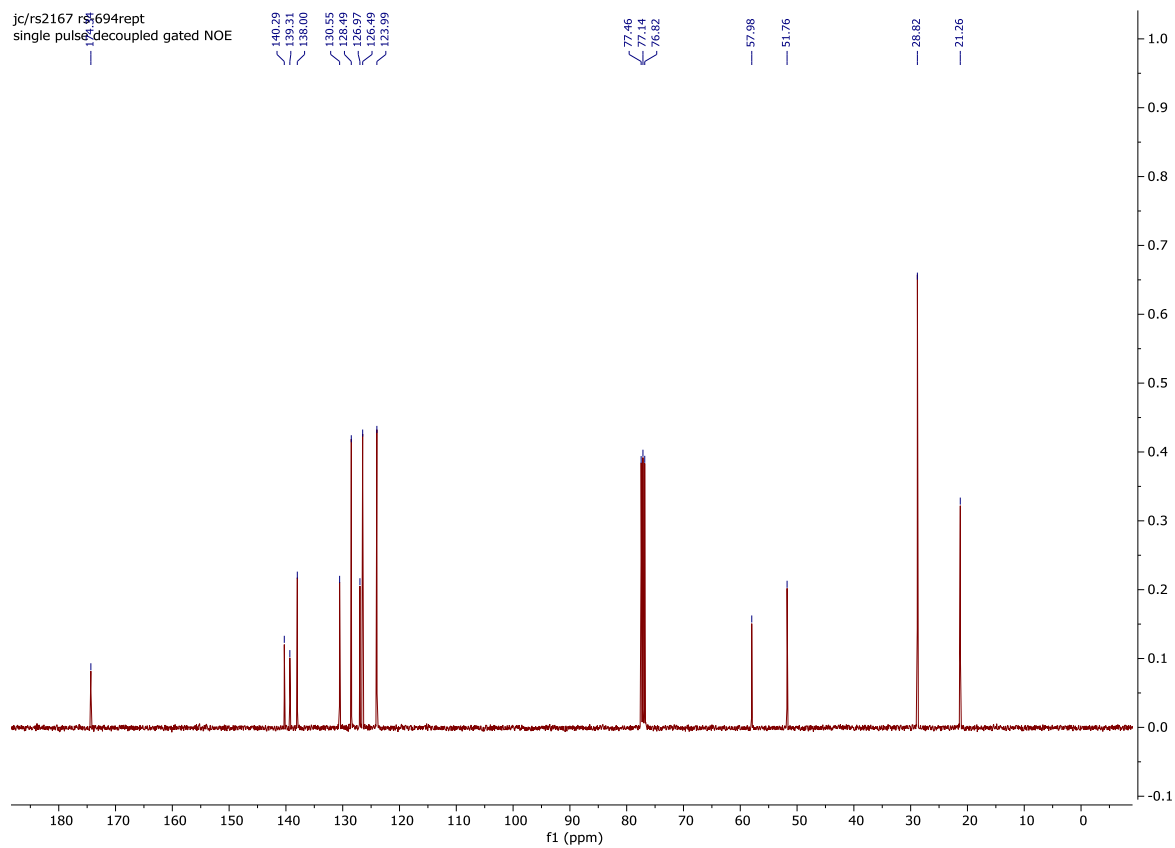

# <sup>1</sup>H NMR

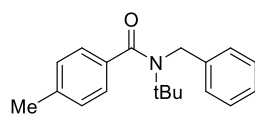

*N*-benzyl-*N*-(tert-butyl)-4-methylbenzamide (2k)

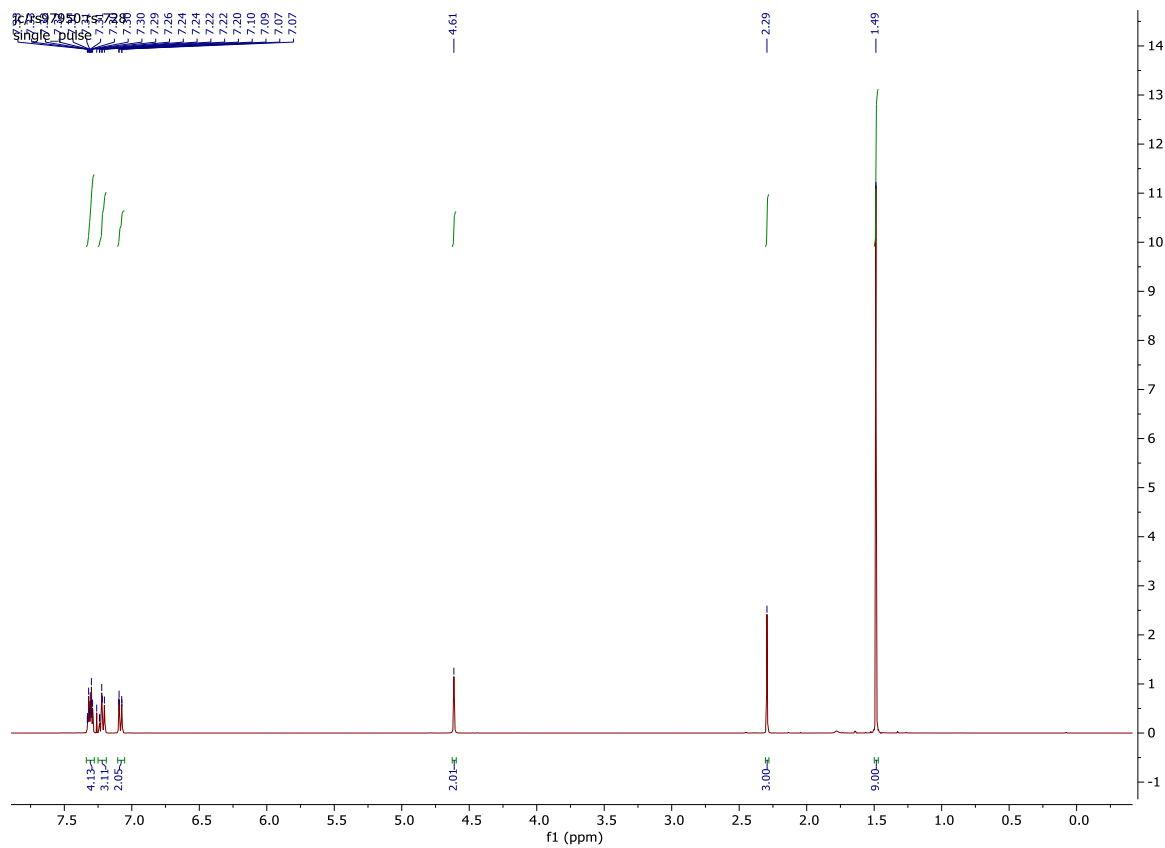

# <sup>13</sup>C NMR

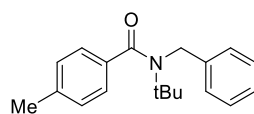

***N*-benzyl-*N*-(*tert*-butyl)-4-methylbenzamide (2k)**

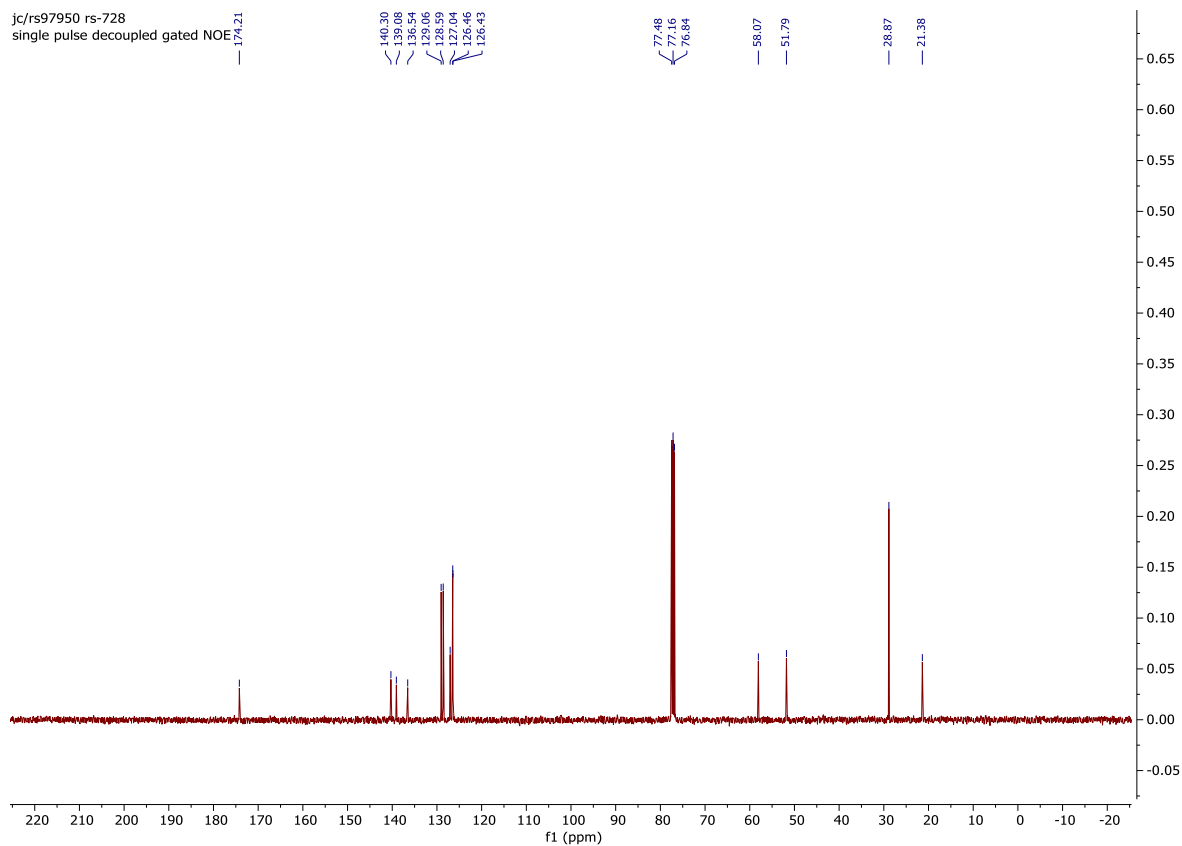

# <sup>1</sup>H NMR

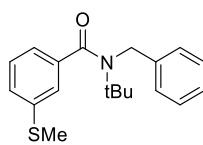

***N*-benzyl-*N*-(*tert*-butyl)-3-(methylthio)benzamide (2l)**

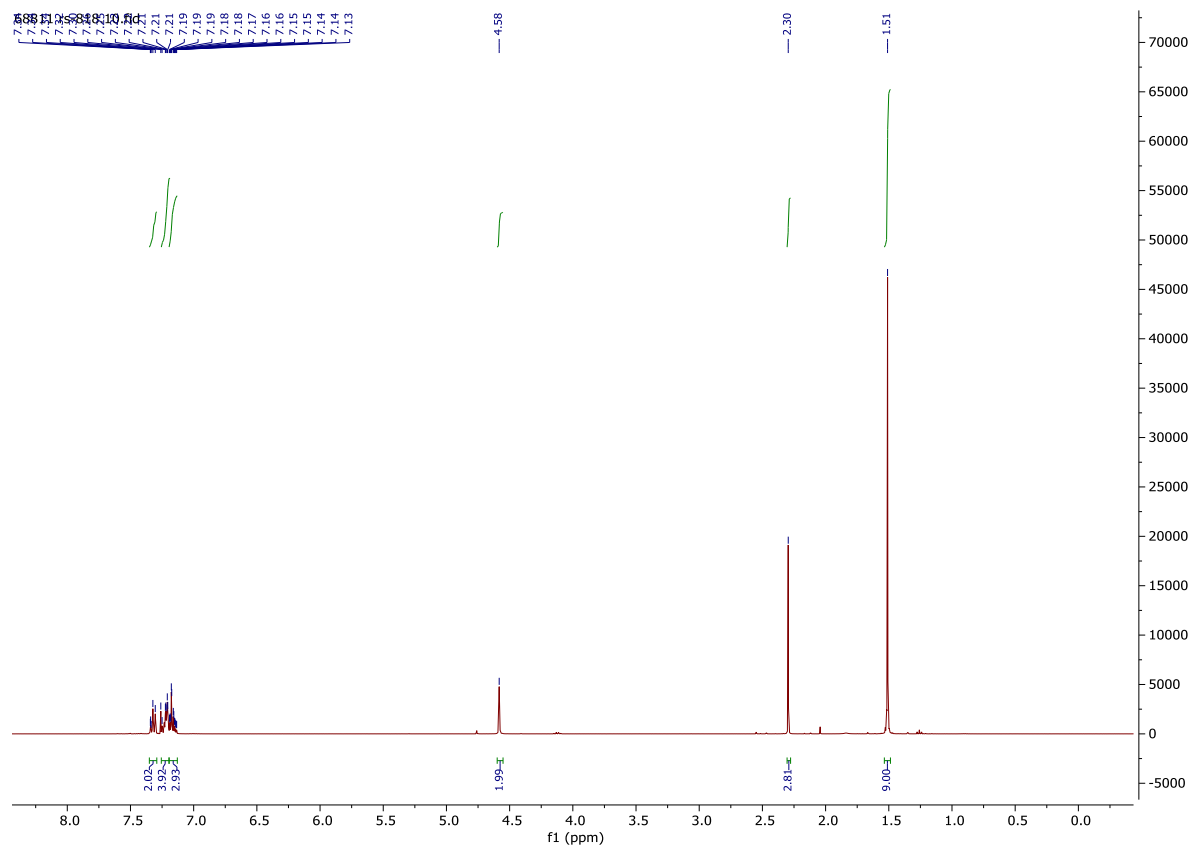

<sup>13</sup>C NMR

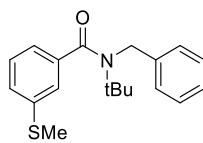

*N*-benzyl-*N*-(*tert*-butyl)-3-(methylthio)benzamide (2l)

68811 rs-818.11.fid

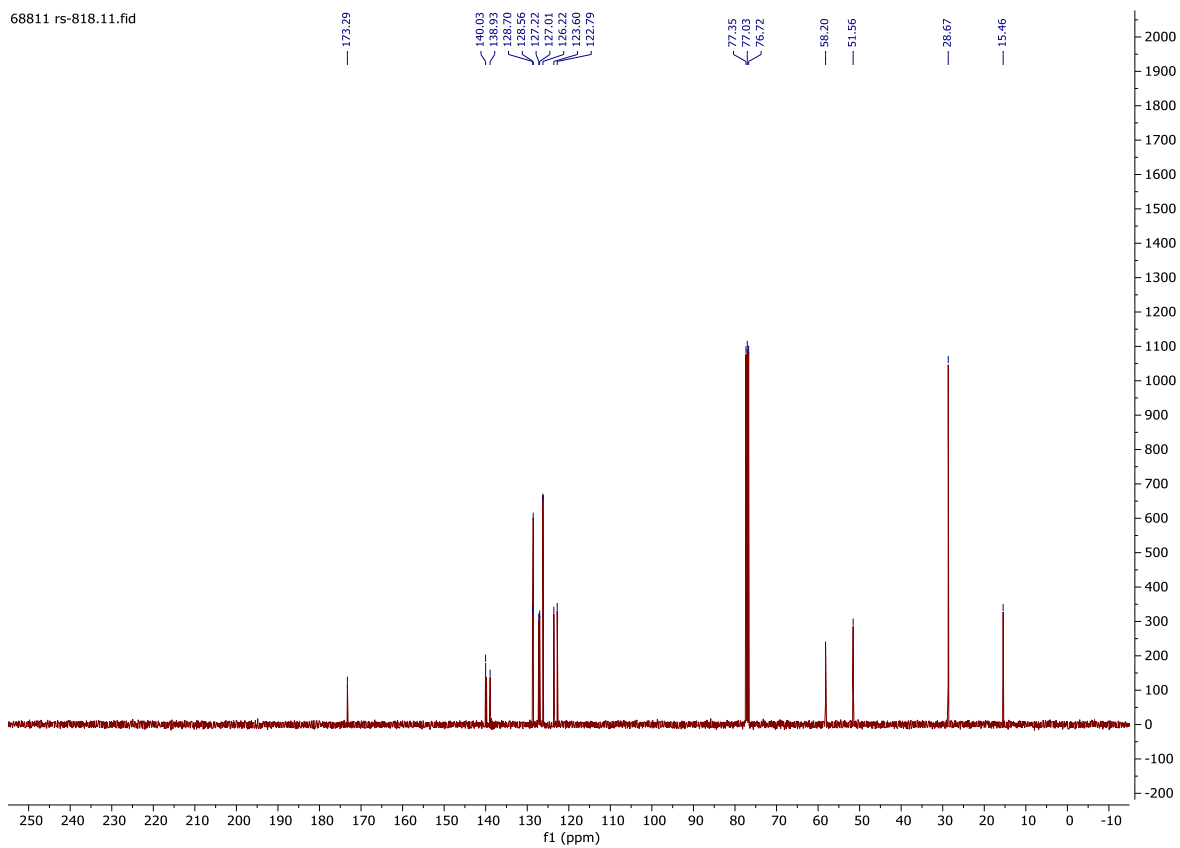



# <sup>1</sup>H NMR

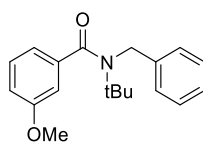

***N*-benzyl-*N*-(*tert*-butyl)-3-methoxybenzamide (2m)**

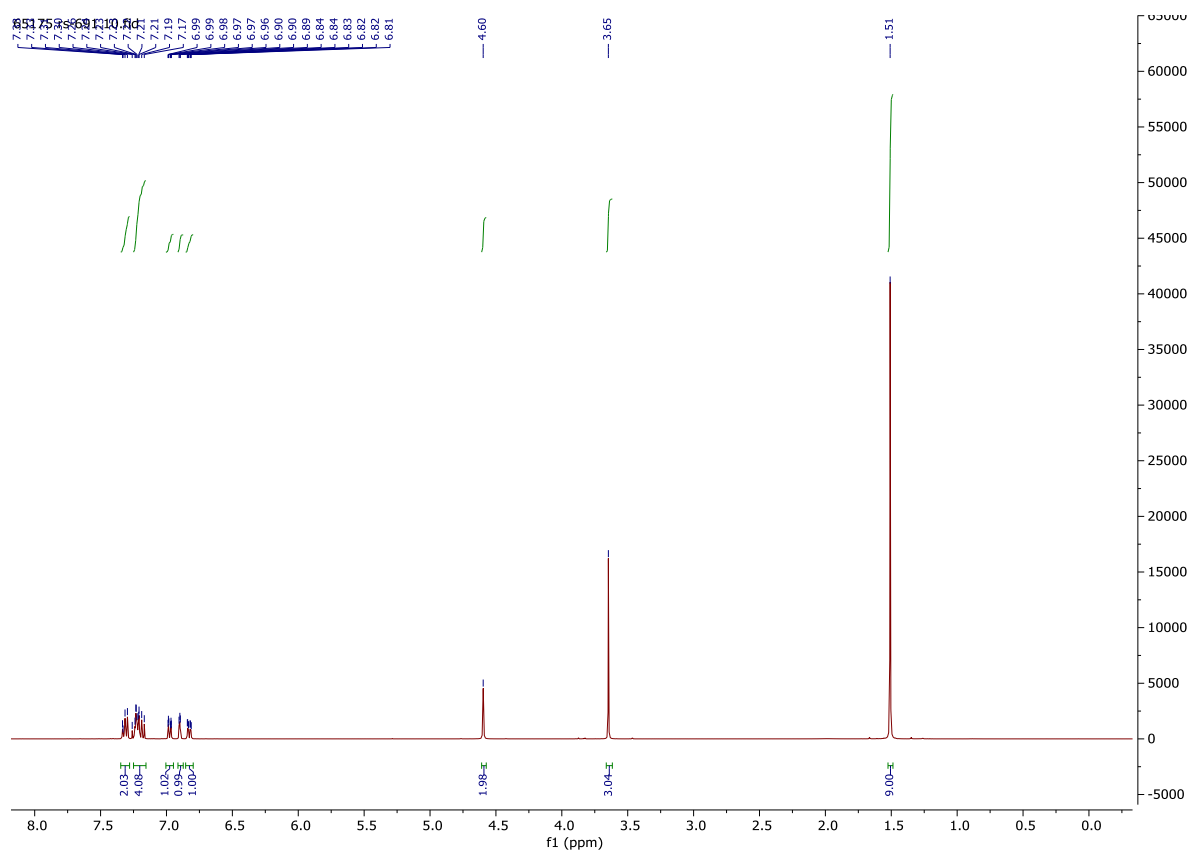

<sup>13</sup>C NMR



*N*-benzyl-*N*-(tert-butyl)-3-methoxybenzamide (2m)

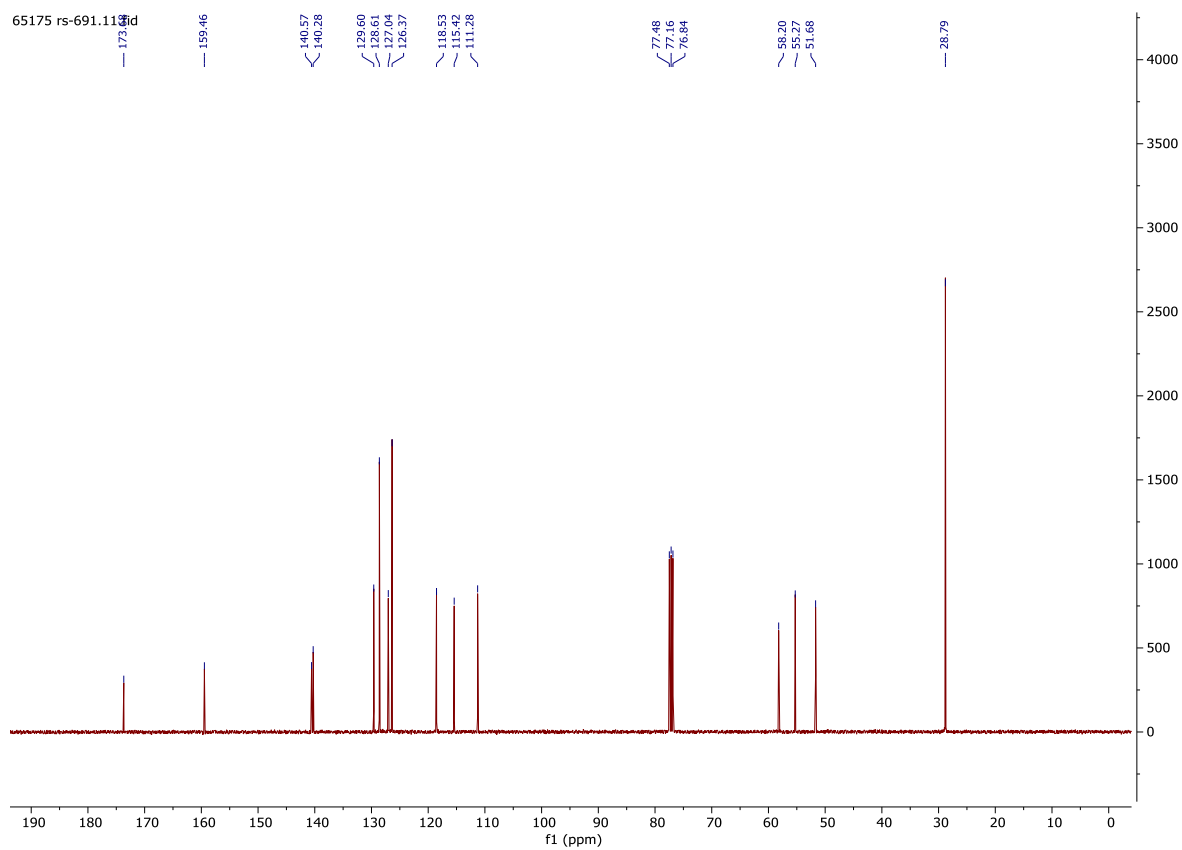

# <sup>1</sup>H NMR

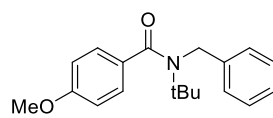

***N*-benzyl-*N*-(tert-butyl)-4-methoxybenzamide (2n)**

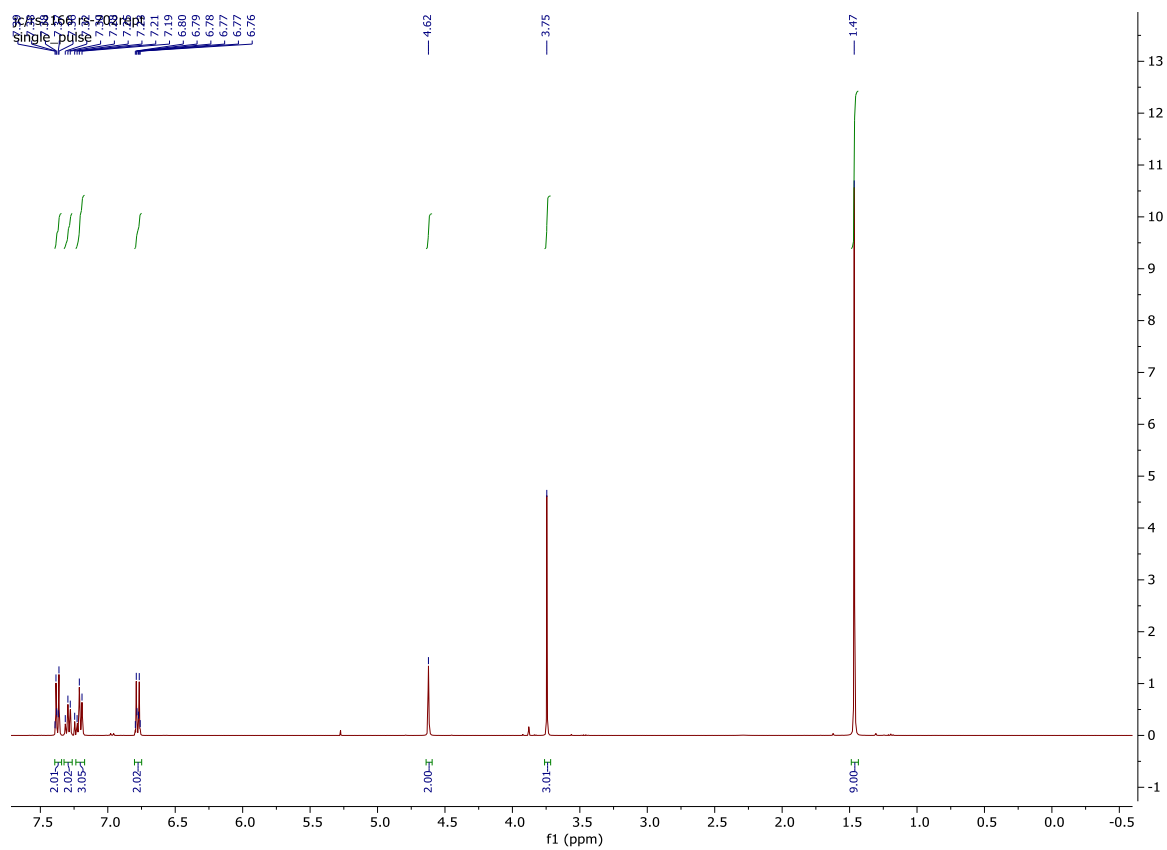

<sup>13</sup>C NMR

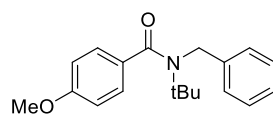

*N*-benzyl-*N*-(tert-butyl)-4-methoxybenzamide (2n)

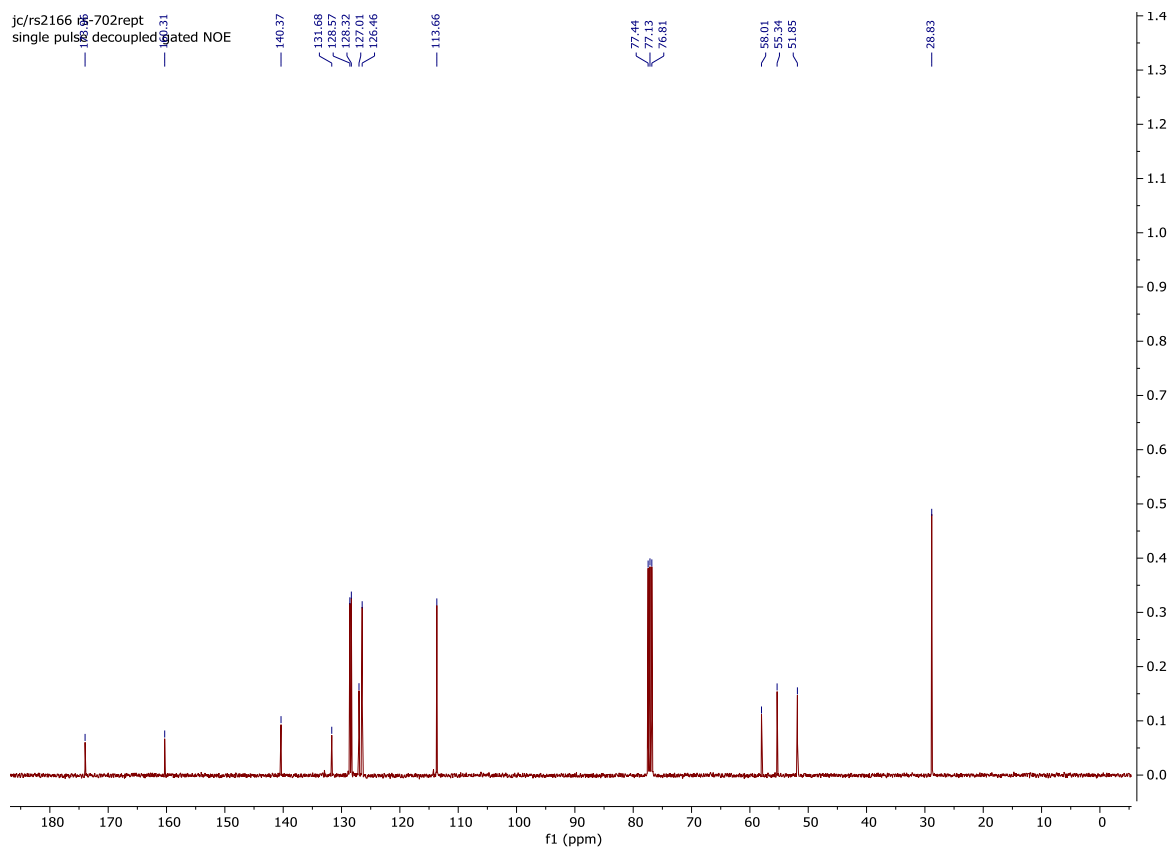

# <sup>1</sup>H NMR

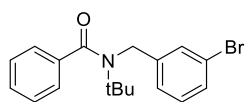

***N*-(3-bromobenzyl)-*N*-(tert-butyl)benzamide (2o)**

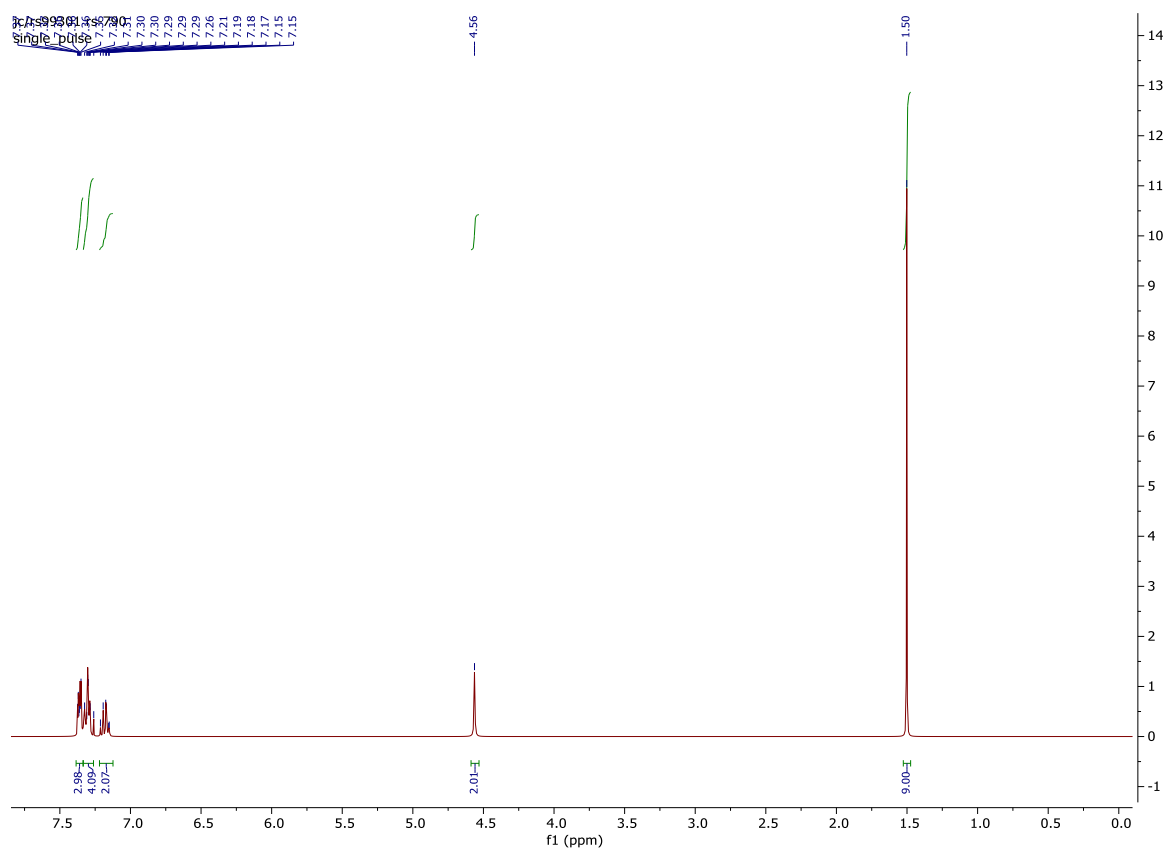

<sup>13</sup>C NMR

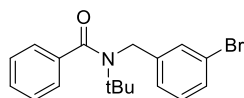

***N*-(3-bromobenzyl)-*N*-(tert-butyl)benzamide (2o)**

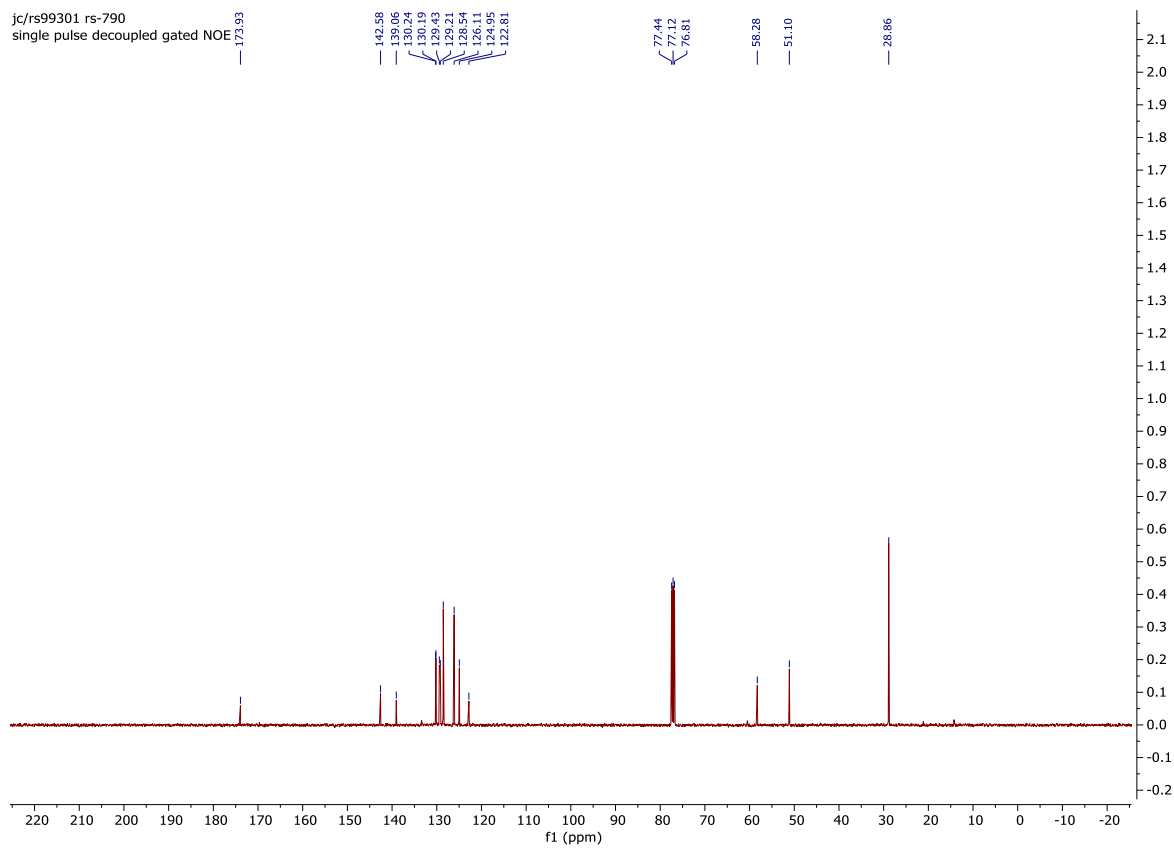

<sup>1</sup>H NMR

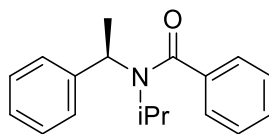

(*R*)-*N*-isopropyl-*N*-(1-phenylethyl)benzamide (10a)

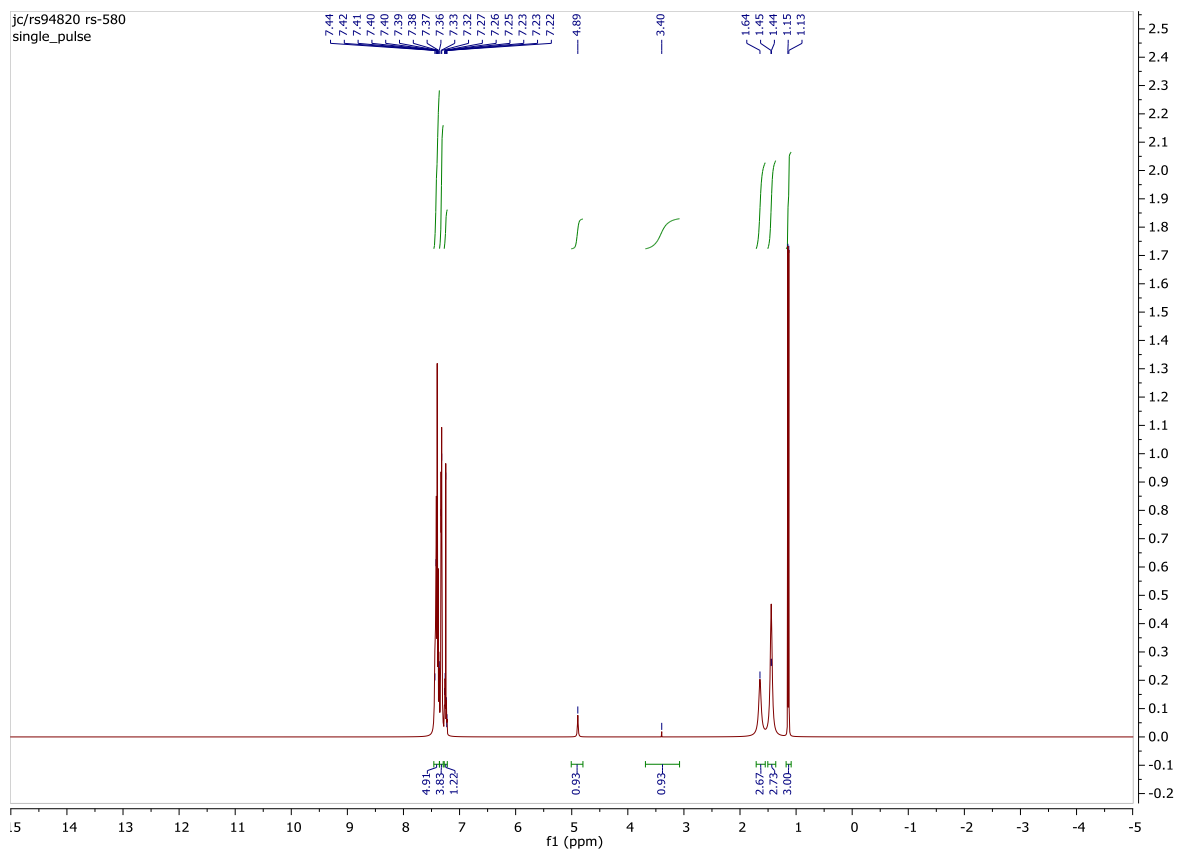

<sup>13</sup>C NMR

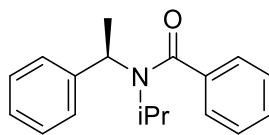

**(R)-N-isopropyl-N-(1-phenylethyl)benzamide (10a)**

jc/rs94820 rs-580  
single pulse decoupled gated NOE

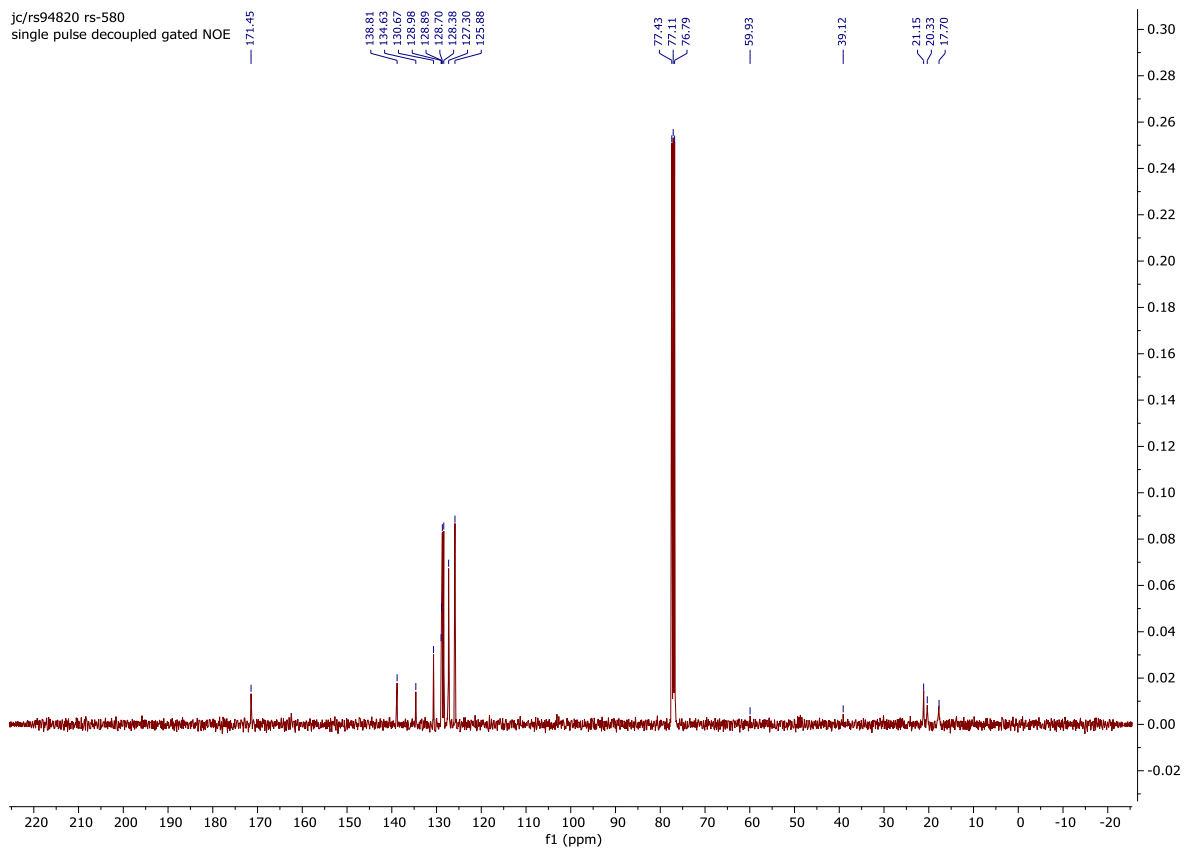



# <sup>1</sup>H NMR

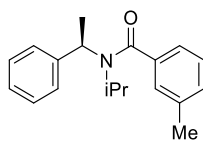

(*R*)-*N*-isopropyl-3-methyl-*N*-(1-phenylethyl)benzamide (10b)

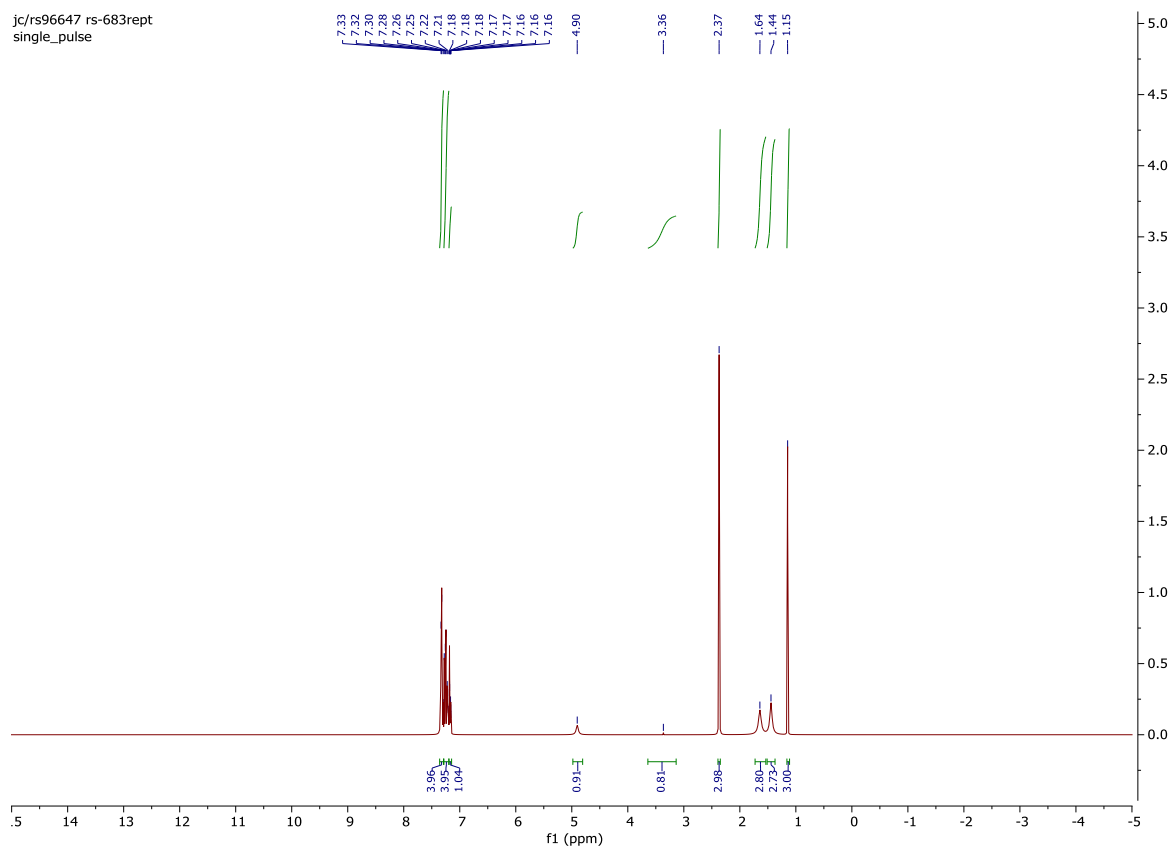

<sup>13</sup>C NMR

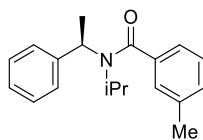

**(*R*)-*N*-isopropyl-3-methyl-*N*-(1-phenylethyl)benzamide (10b)**

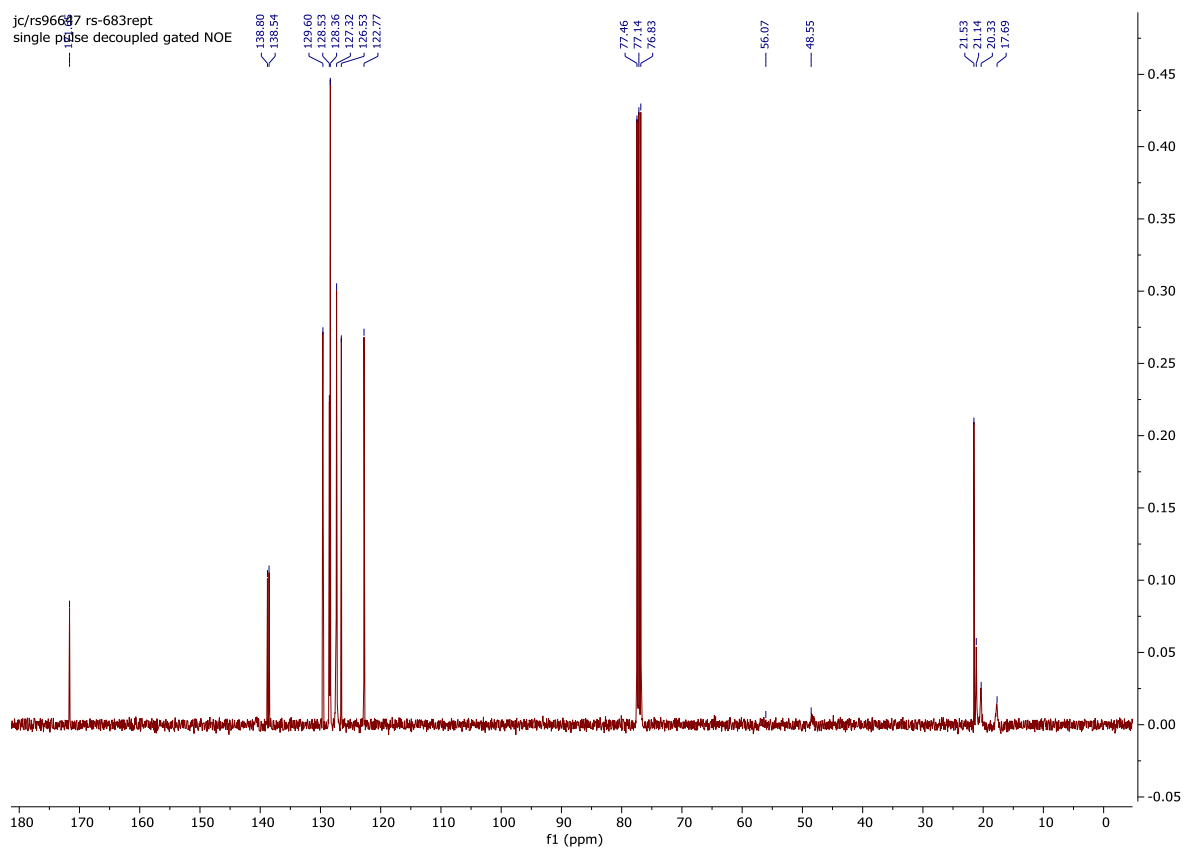

<sup>1</sup>H NMR

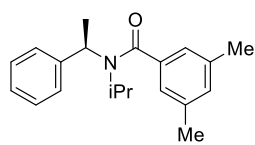

**(R)-N-isopropyl-3,5-dimethyl-N-(1-phenylethyl)benzamide (10c)**

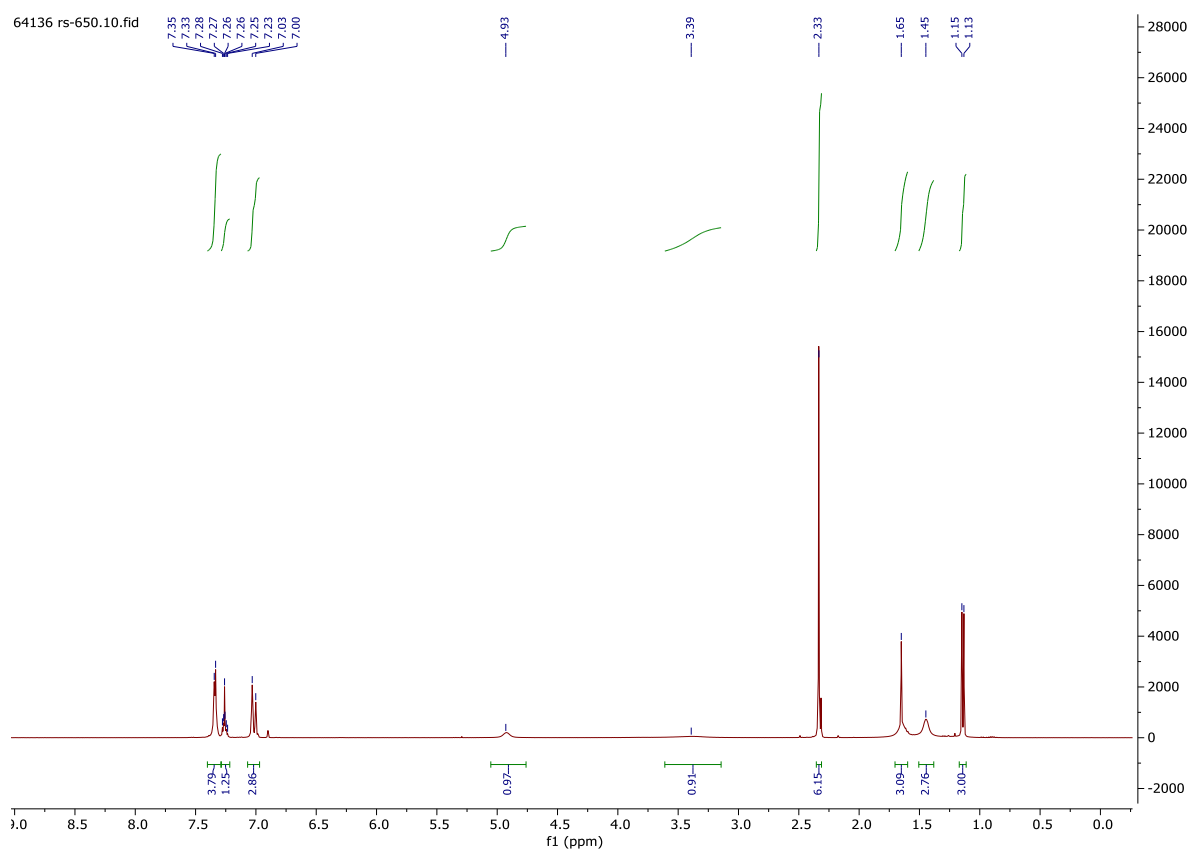

<sup>13</sup>C NMR

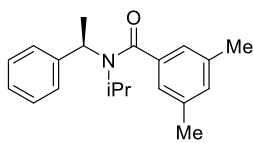

**(R)-N-isopropyl-3,5-dimethyl-N-(1-phenylethyl)benzamide (10c)**

64135 rs-649.11.fid

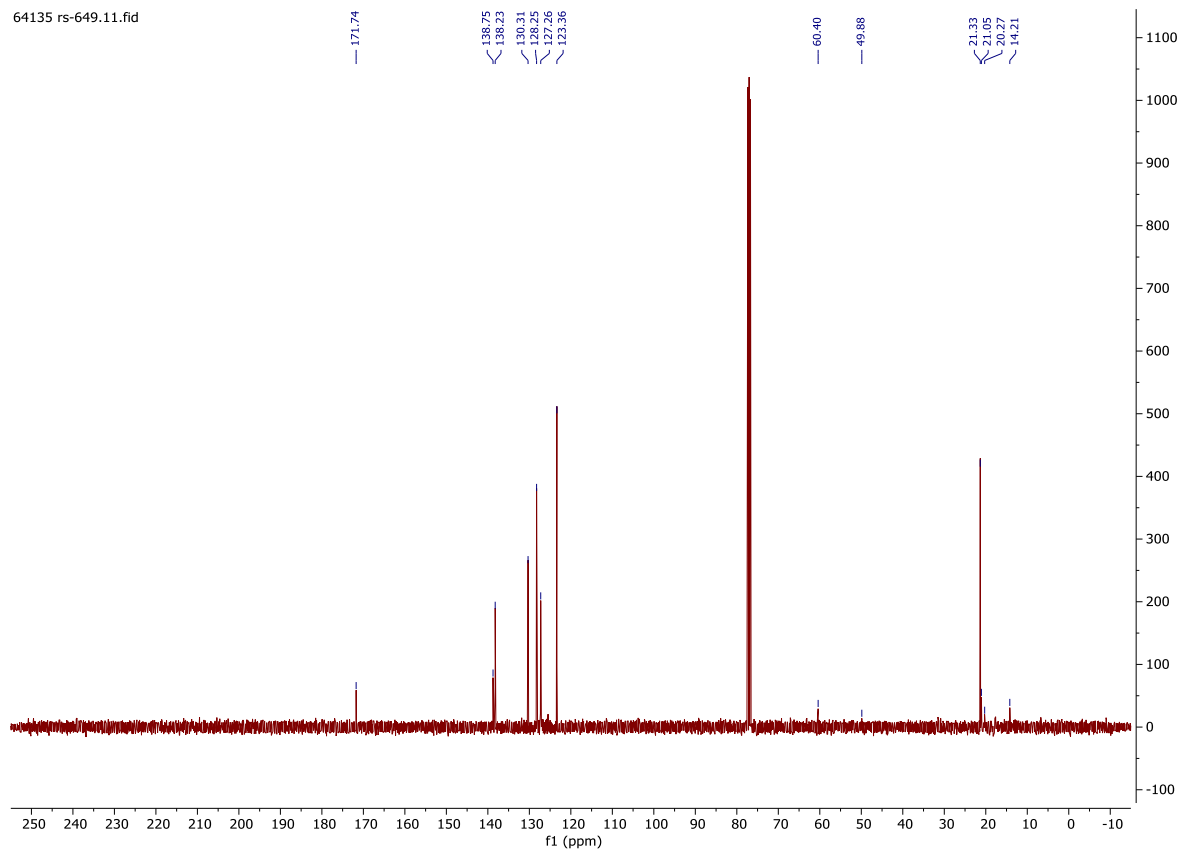

# <sup>1</sup>H NMR

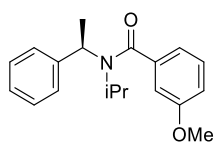

## (R)-N-isopropyl-3-methoxy-N-(1-phenylethyl)benzamide (10d)

jc/rs95936 rs-648  
single\_pulse

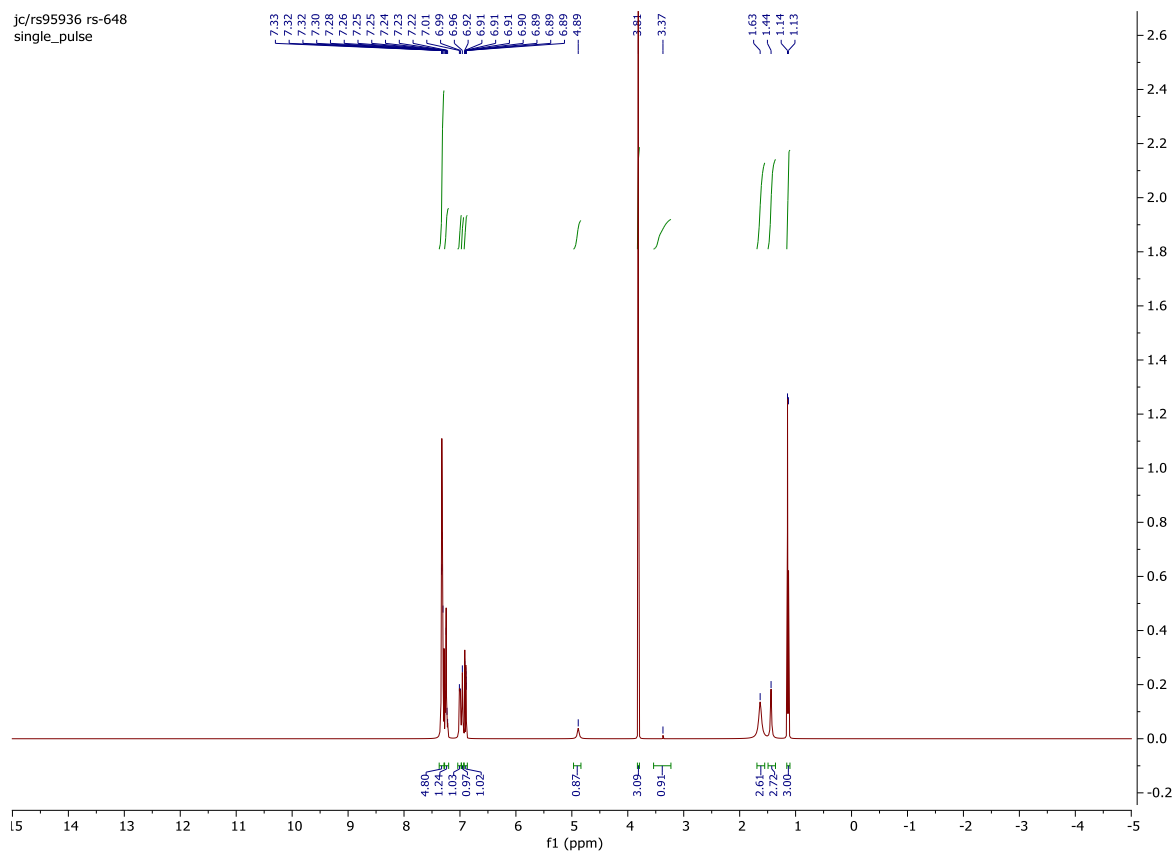

<sup>13</sup>C NMR

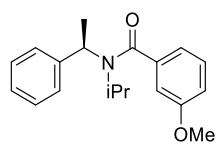

**(*R*)-*N*-isopropyl-3-methoxy-*N*-(1-phenylethyl)benzamide (10d)**

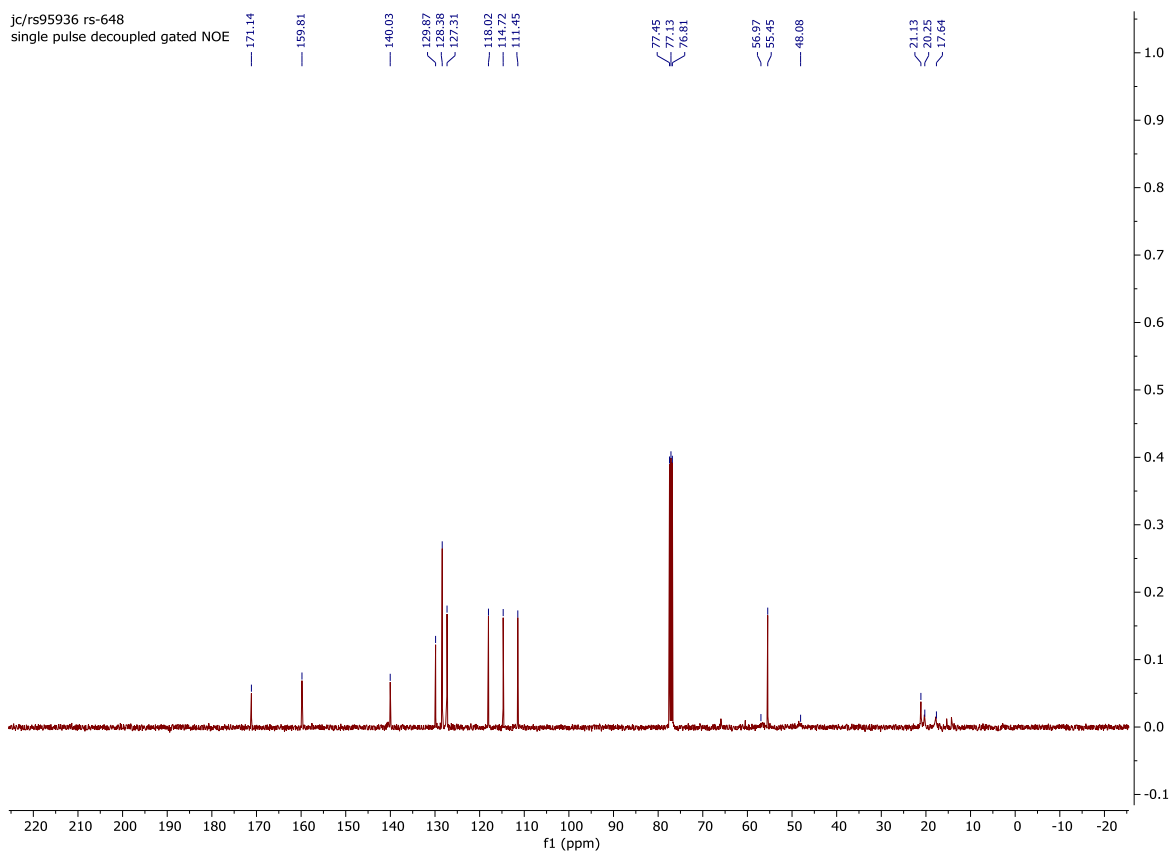

# <sup>1</sup>H NMR

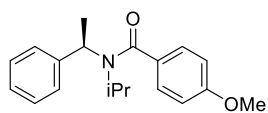

## (R)-N-isopropyl-4-methoxy-N-(1-phenylethyl)benzamide (10e)

jc/rs94941 rs-590  
single\_pulse

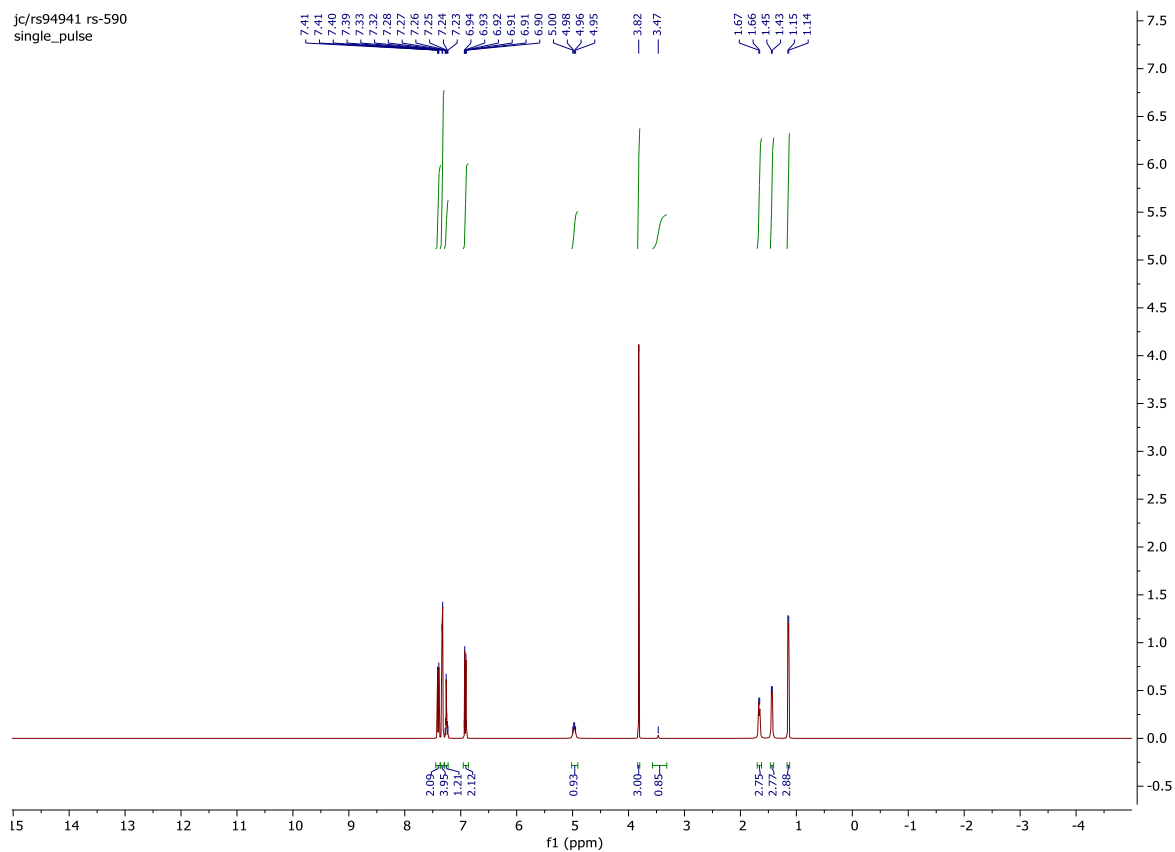

<sup>13</sup>CNMR



**(*R*)-*N*-isopropyl-4-methoxy-*N*-(1-phenylethyl)benzamide (10e)**

jc/rs94941 rs-590

single pulse decoupled gated NOE

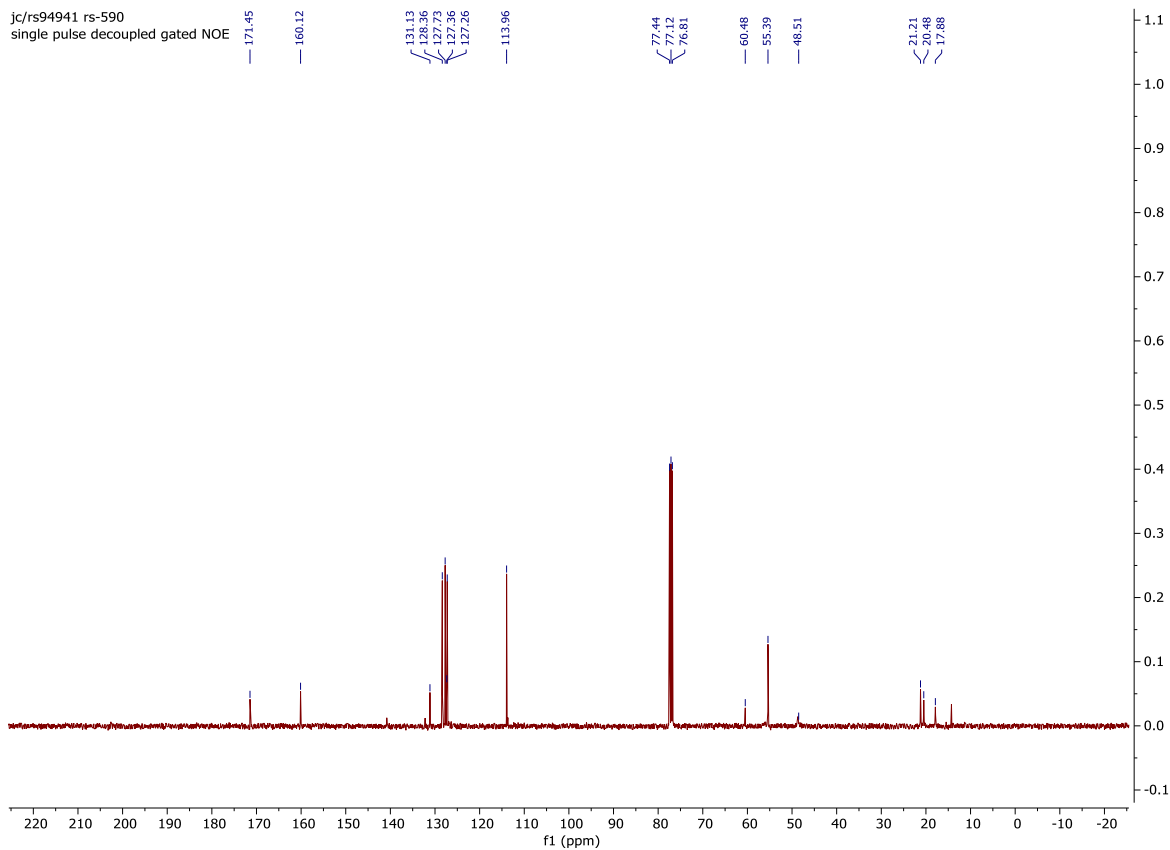



# <sup>1</sup>H NMR

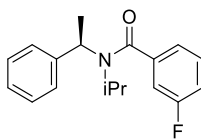

**(R)-3-fluoro-N-isopropyl-N-(1-phenylethyl)benzamide (10f)**

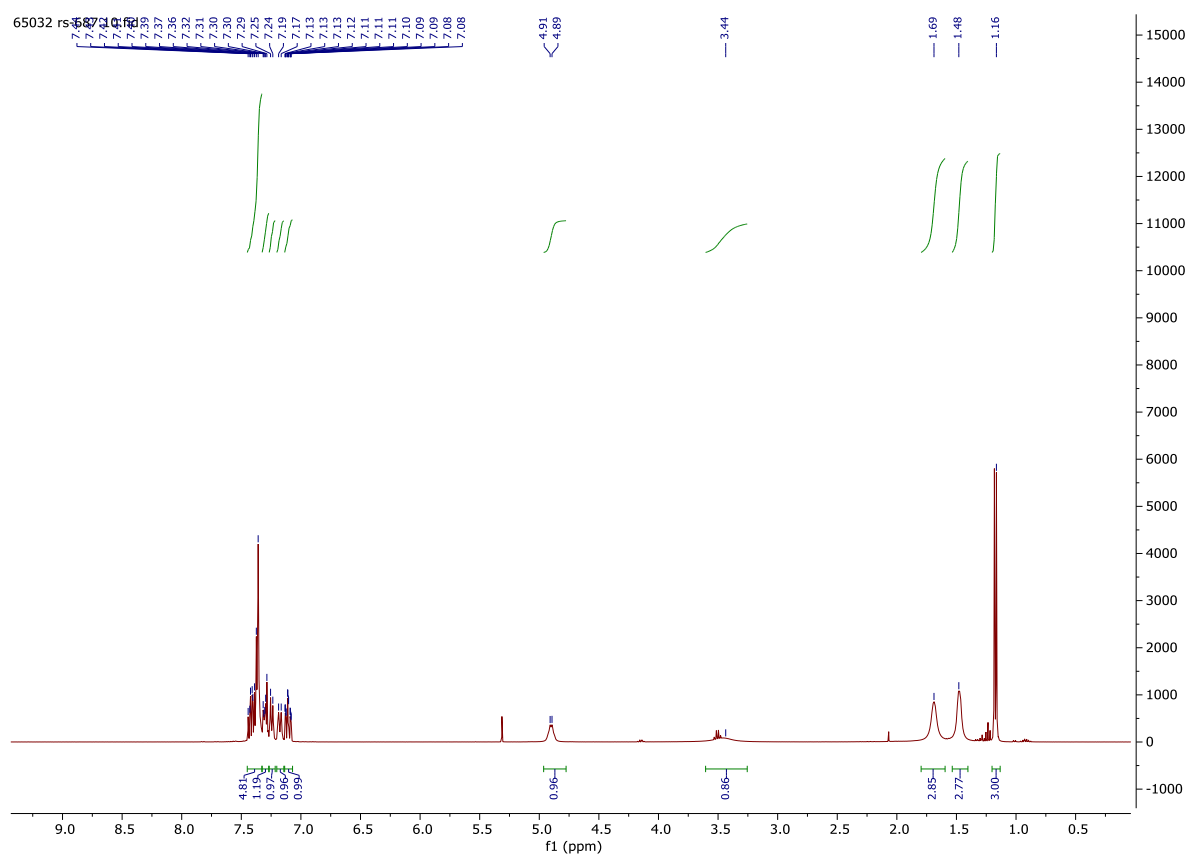

<sup>13</sup>C NMR



**(R)-3-fluoro-N-isopropyl-N-(1-phenylethyl)benzamide (10f)**

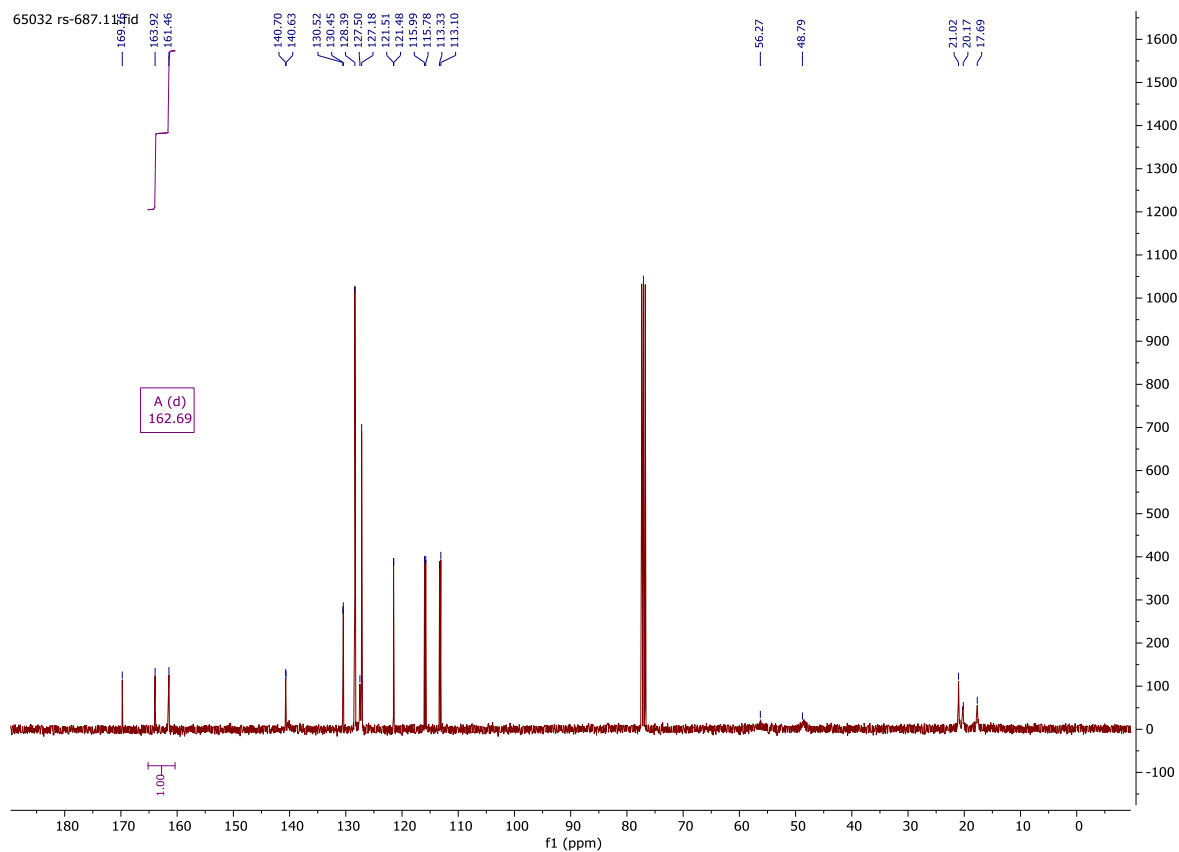

# <sup>1</sup>H NMR

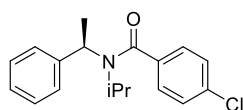

## (*R*)-4-chloro-*N*-isopropyl-*N*-(1-phenylethyl)benzamide (10g)

jc/rs95051 rs-598A  
single\_pulse

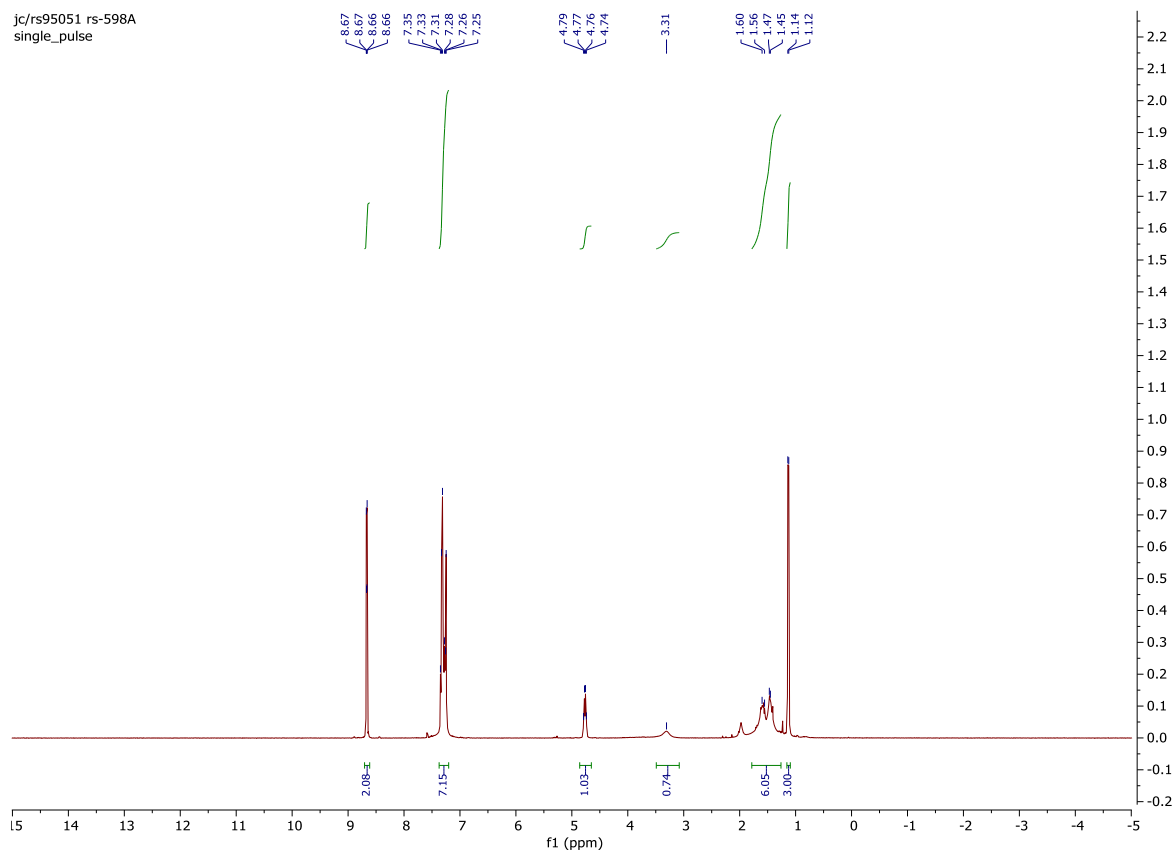

<sup>13</sup>C NMR

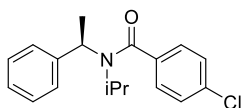

**(*R*)-4-chloro-*N*-isopropyl-*N*-(1-phenylethyl)benzamide (10g)**

jc/rs95051 rs-598A  
single pulse decoupled gated NOE

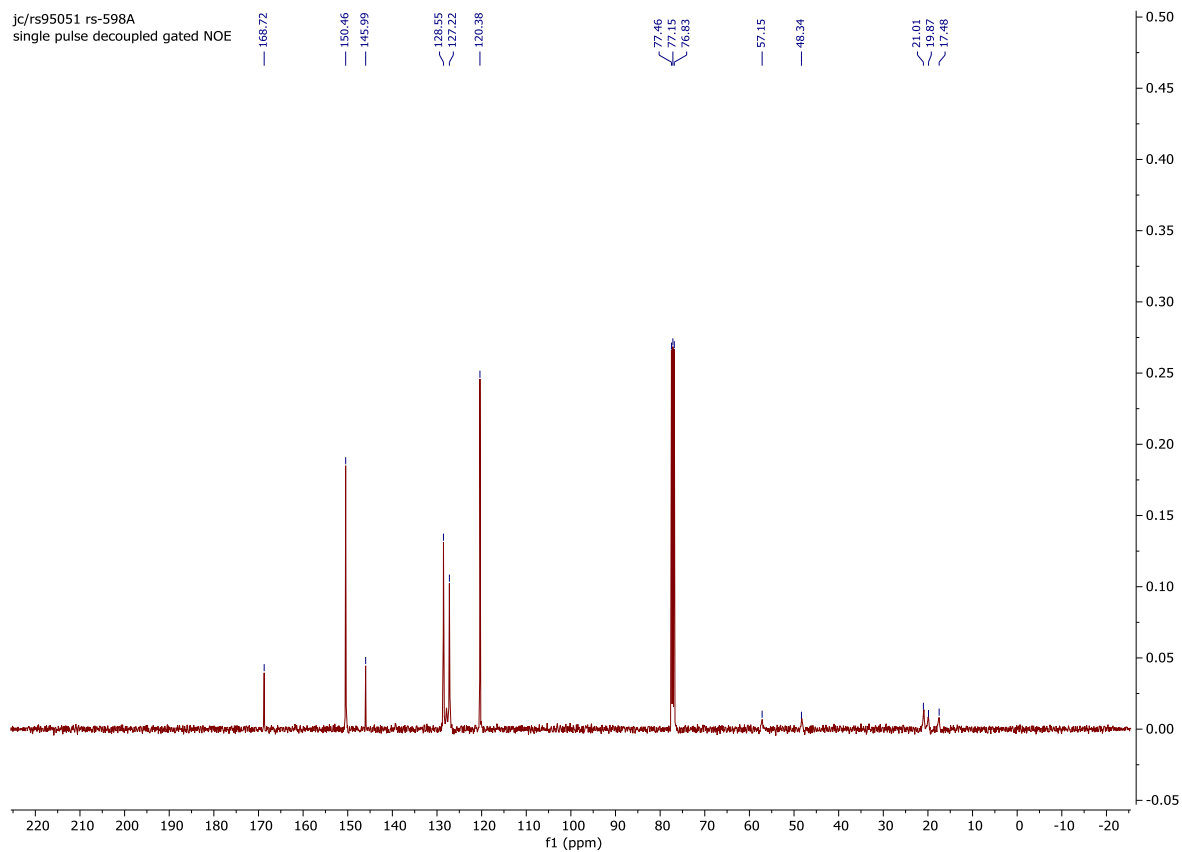

# <sup>1</sup>H NMR

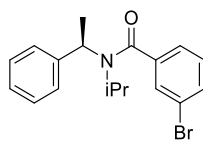

**(*R*)-3-bromo-*N*-isopropyl-*N*-(1-phenylethyl)benzamide (10h)**

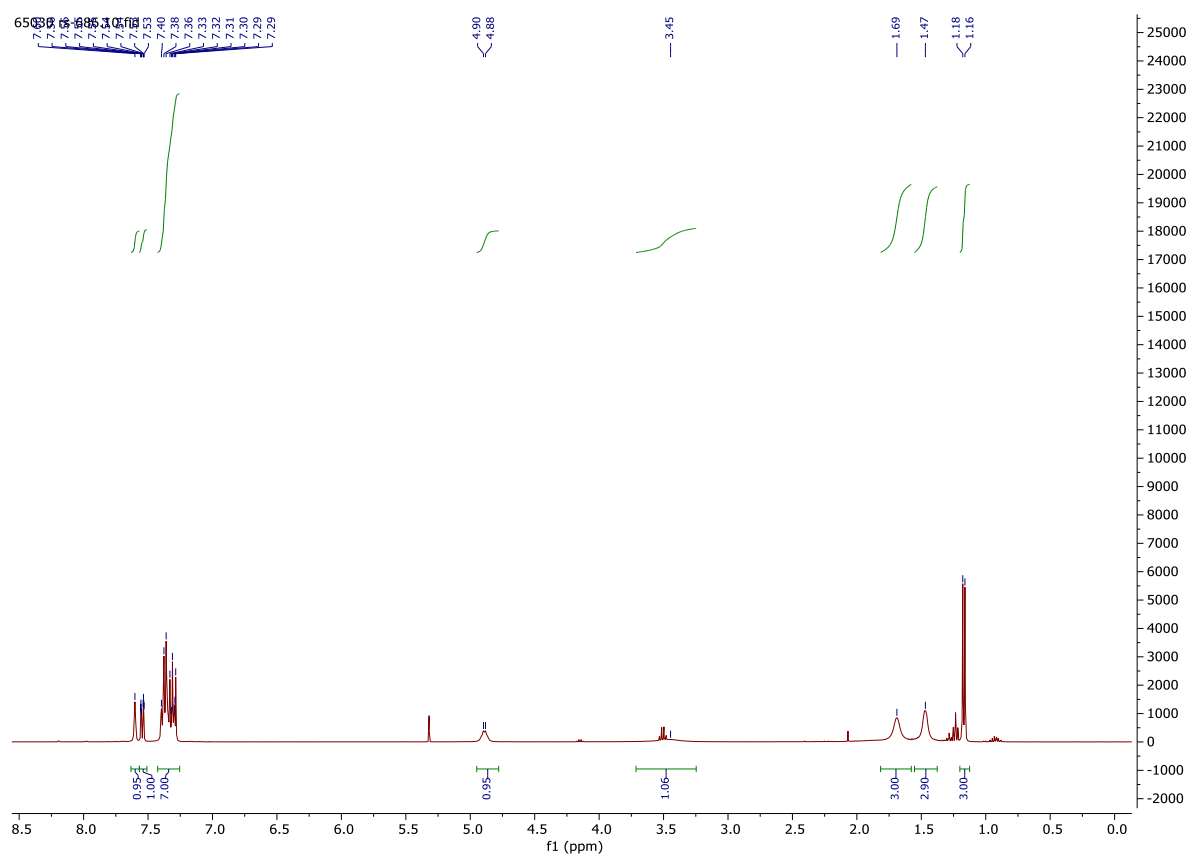

<sup>13</sup>C NMR

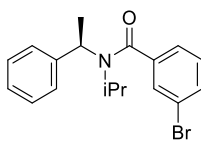

**(*R*)-3-bromo-*N*-isopropyl-*N*-(1-phenylethyl)benzamide (10h)**

65030 rs-686.11.fid

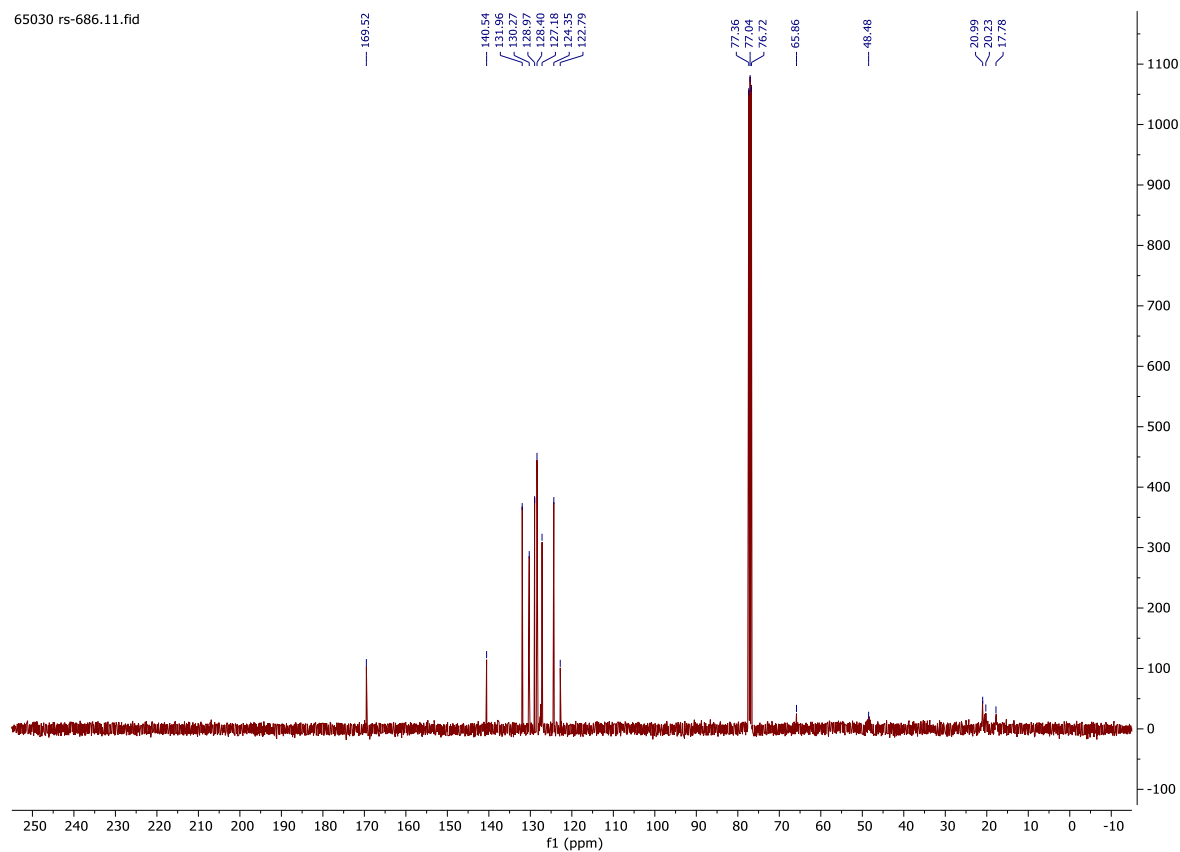

<sup>1</sup>H NMR

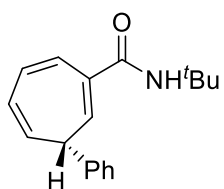

**(*R*)-*N*-(tert-butyl)-3-phenylcyclohepta-1,4,6-triene-1-carboxamide (4a)**

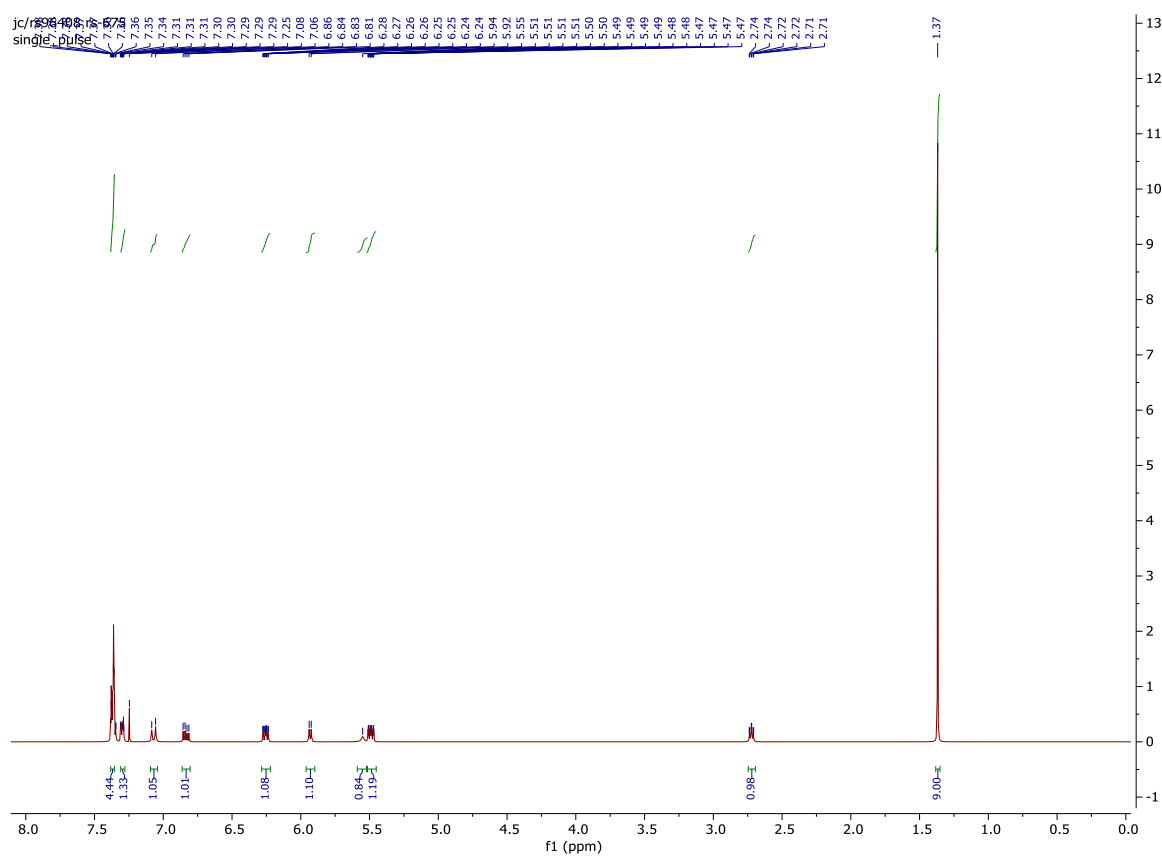

<sup>13</sup>C NMR

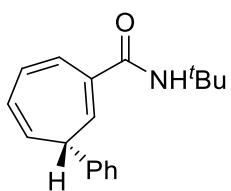

**(*R*)-*N*-(tert-butyl)-3-phenylcyclohepta-1,4,6-triene-1-carboxamide (4a)**

jc/rs96408 rs-675  
single pulse decoupled gated NOE

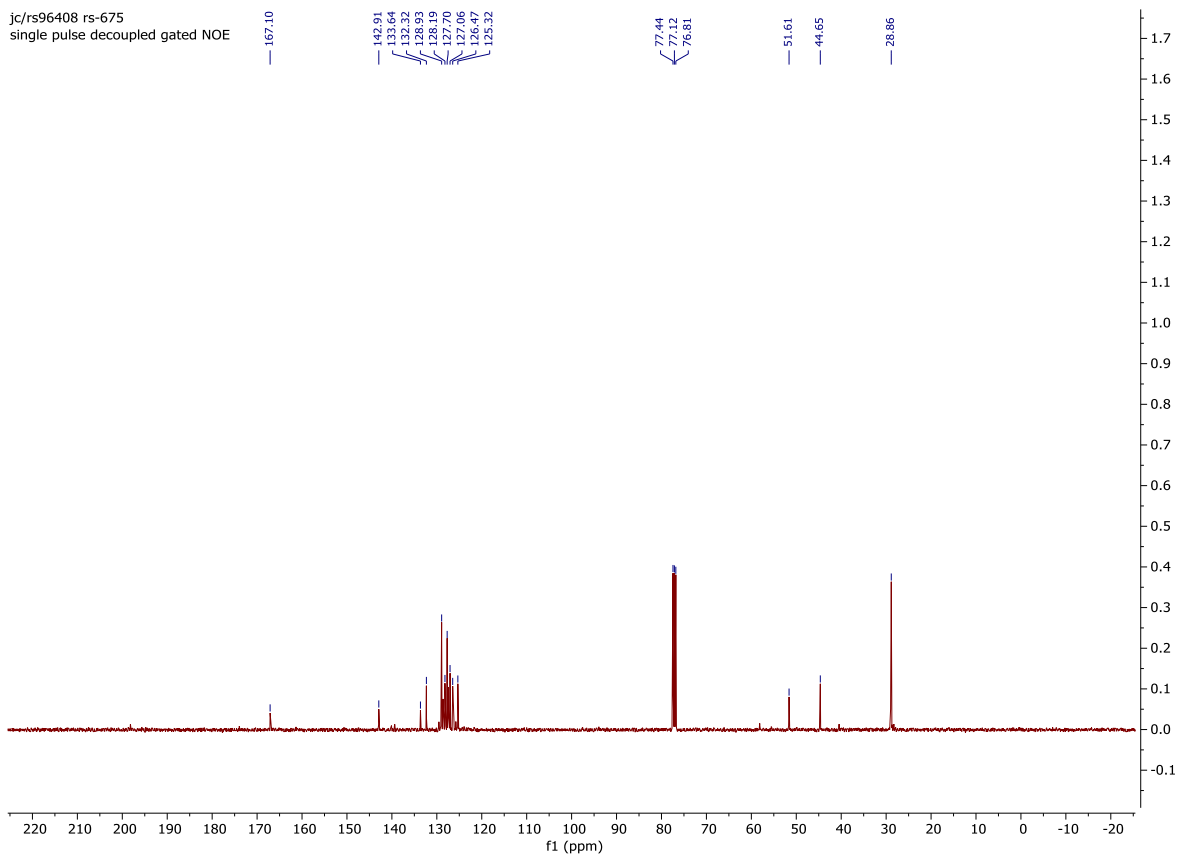



# HPLC

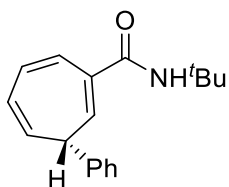

## (*R*)-*N*-(tert-butyl)-3-phenylcyclohepta-1,4,6-triene-1-carboxamide (4a)

**Analytical HPLC** (Chiral Regis Whelk O1), eluting with IPA–hexane (15:85), showed it to consist of a 3.798:96.202 mixture of two enantiomers with retention times 20.100 and 25.999 min respectively (ee = 92 %).

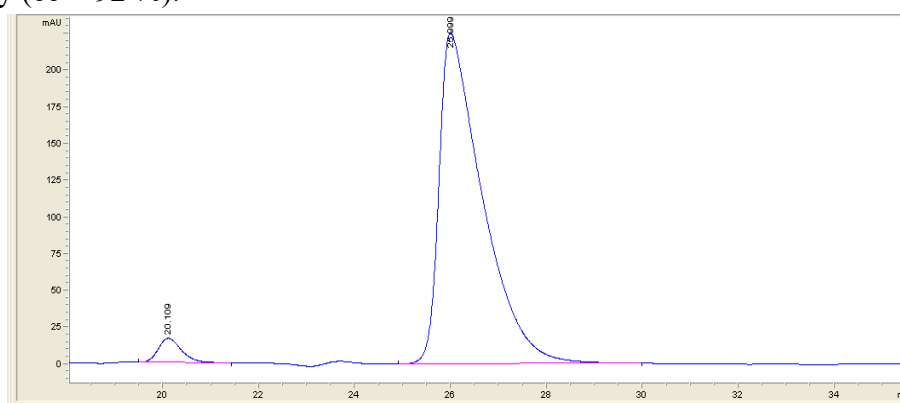

| File Information |                                                        |  |  |  |  |  |  |
|------------------|--------------------------------------------------------|--|--|--|--|--|--|
| LC-File          | RS-703.D                                               |  |  |  |  |  |  |
| File Path        | E:\CHEM\32\1\DATA\RAKESH\RAKESH S 2020-09-29 16-17-39\ |  |  |  |  |  |  |
| Date             | 29-Sep-20, 16:16:20                                    |  |  |  |  |  |  |
| Sample           | RS-703                                                 |  |  |  |  |  |  |
| Sample Info      | 85:15 hex:IPA IA                                       |  |  |  |  |  |  |
| Barcode          |                                                        |  |  |  |  |  |  |
| Operator         | SYSTEM                                                 |  |  |  |  |  |  |
| Method           | RAKESH 85:15 HEX:ANE-IPA1MLM                           |  |  |  |  |  |  |
| Analysis Time    | 42.247 min                                             |  |  |  |  |  |  |
| Sampling Rate    | 0.0067 min (0.402 sec), 6338 datapoints                |  |  |  |  |  |  |

| # | Time   | Area    | Height | Width  | Area%  | Symmetry |
|---|--------|---------|--------|--------|--------|----------|
| 1 | 20.109 | 559.9   | 16.5   | 0.5142 | 3.798  | 0.699    |
| 2 | 25.999 | 14182.4 | 225.1  | 0.9051 | 96.202 | 0.341    |

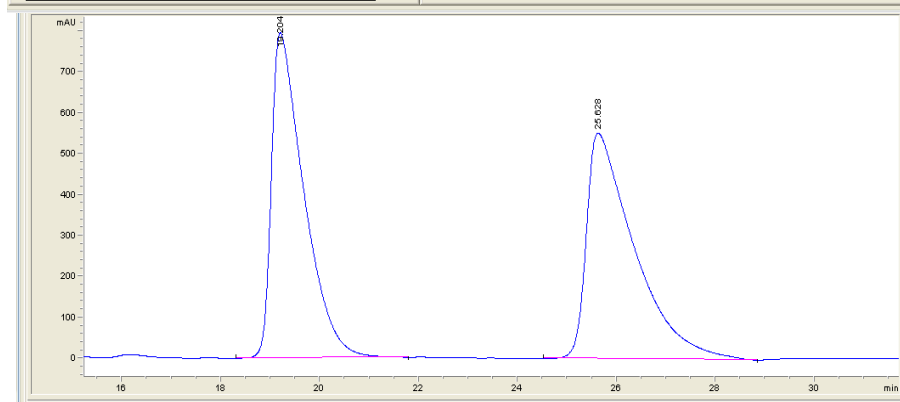

| File Information |                                                        |  |  |  |  |  |  |
|------------------|--------------------------------------------------------|--|--|--|--|--|--|
| LC-File          | RS-688.D                                               |  |  |  |  |  |  |
| File Path        | E:\CHEM\32\1\DATA\RAKESH\RAKESH S 2020-09-23 10-46-48\ |  |  |  |  |  |  |
| Date             | 23-Sep-20, 10:47:29                                    |  |  |  |  |  |  |
| Sample           | RS-688                                                 |  |  |  |  |  |  |
| Sample Info      | 85:15 hex:IPA IA                                       |  |  |  |  |  |  |
| Barcode          |                                                        |  |  |  |  |  |  |
| Operator         | SYSTEM                                                 |  |  |  |  |  |  |
| Method           | RAKESH 85:15 HEX:ANE-IPA1MLM                           |  |  |  |  |  |  |
| Analysis Time    | 31.813 min                                             |  |  |  |  |  |  |
| Sampling Rate    | 0.0067 min (0.402 sec), 4773 datapoints                |  |  |  |  |  |  |

| # | Time   | Area    | Height | Width  | Area%  | Symmetry |
|---|--------|---------|--------|--------|--------|----------|
| 1 | 19.204 | 36107.8 | 794.2  | 0.6584 | 49.289 | 0.36     |
| 2 | 25.628 | 37149.4 | 551.7  | 0.9435 | 50.711 | 0.304    |

<sup>1</sup>H NMR

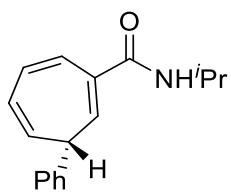

**(R)-N-isopropyl-3-phenylcyclohepta-1,4,6-triene-1-carboxamide (4a')**

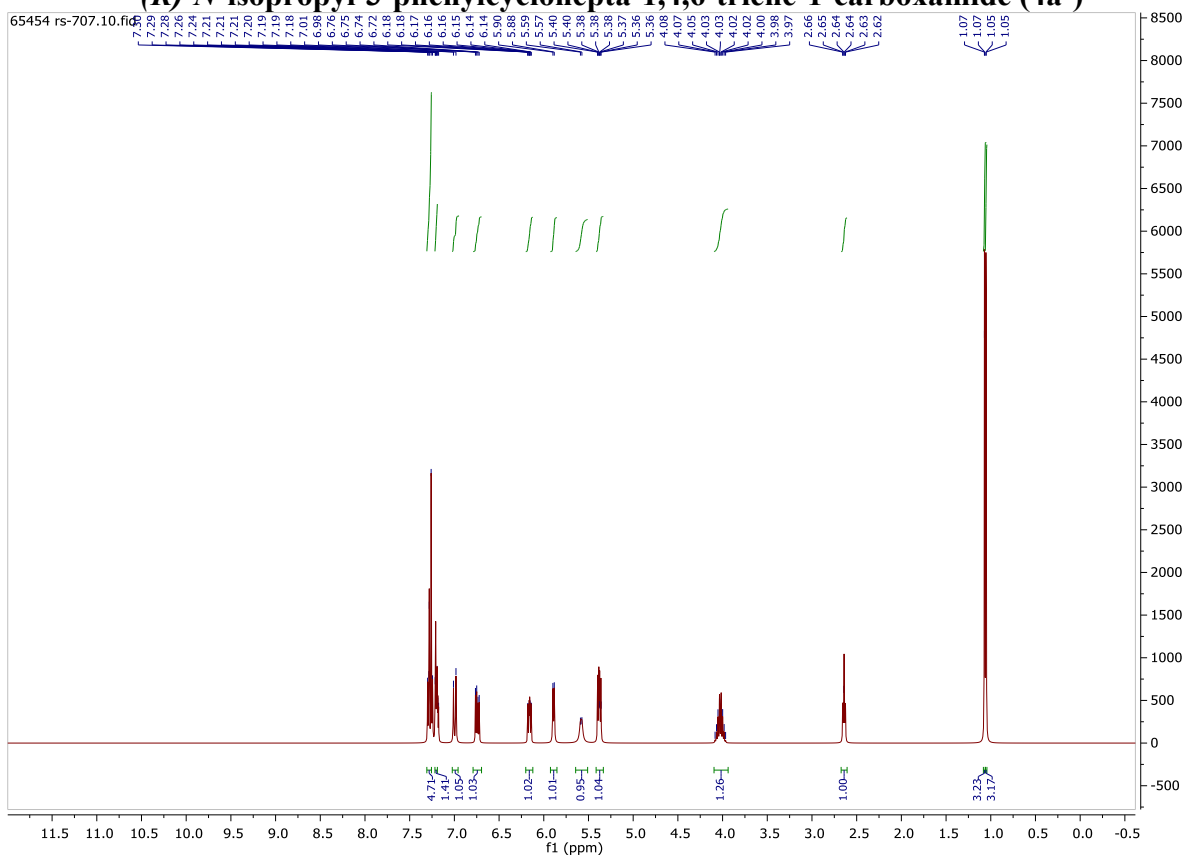

<sup>13</sup>C NMR

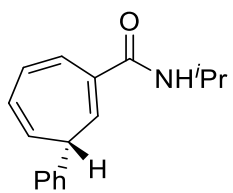

**(*R*)-*N*-isopropyl-3-phenylcyclohepta-1,4,6-triene-1-carboxamide (4a')**

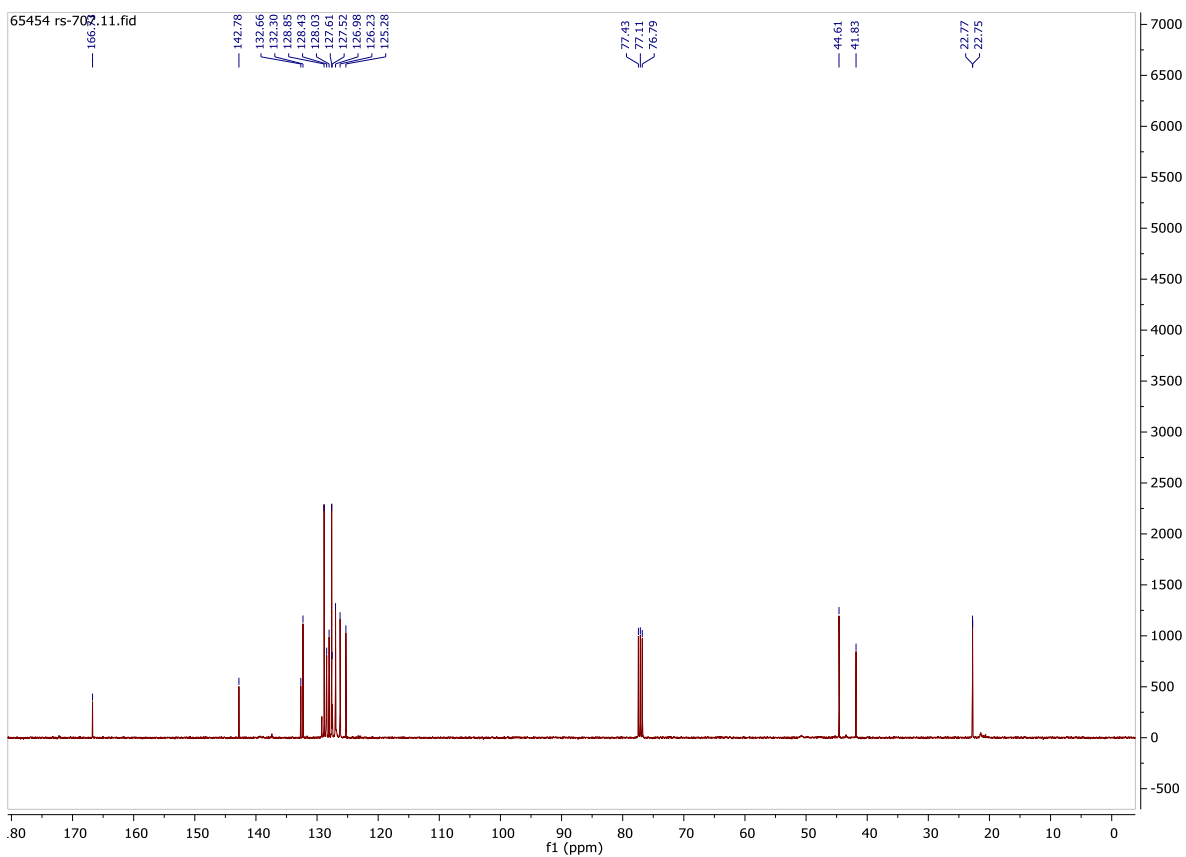

## HPLC

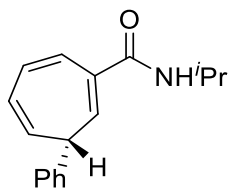

**(*R*)-*N*-isopropyl-3-phenylcyclohepta-1,4,6-triene-1-carboxamide (4a')**

Analytical HPLC (IA column), eluting with IPA–hexane (02:98), showed it to consist of a 42:58 mixture of two enantiomers with retention times 18.22 and 24.32 min respectively.

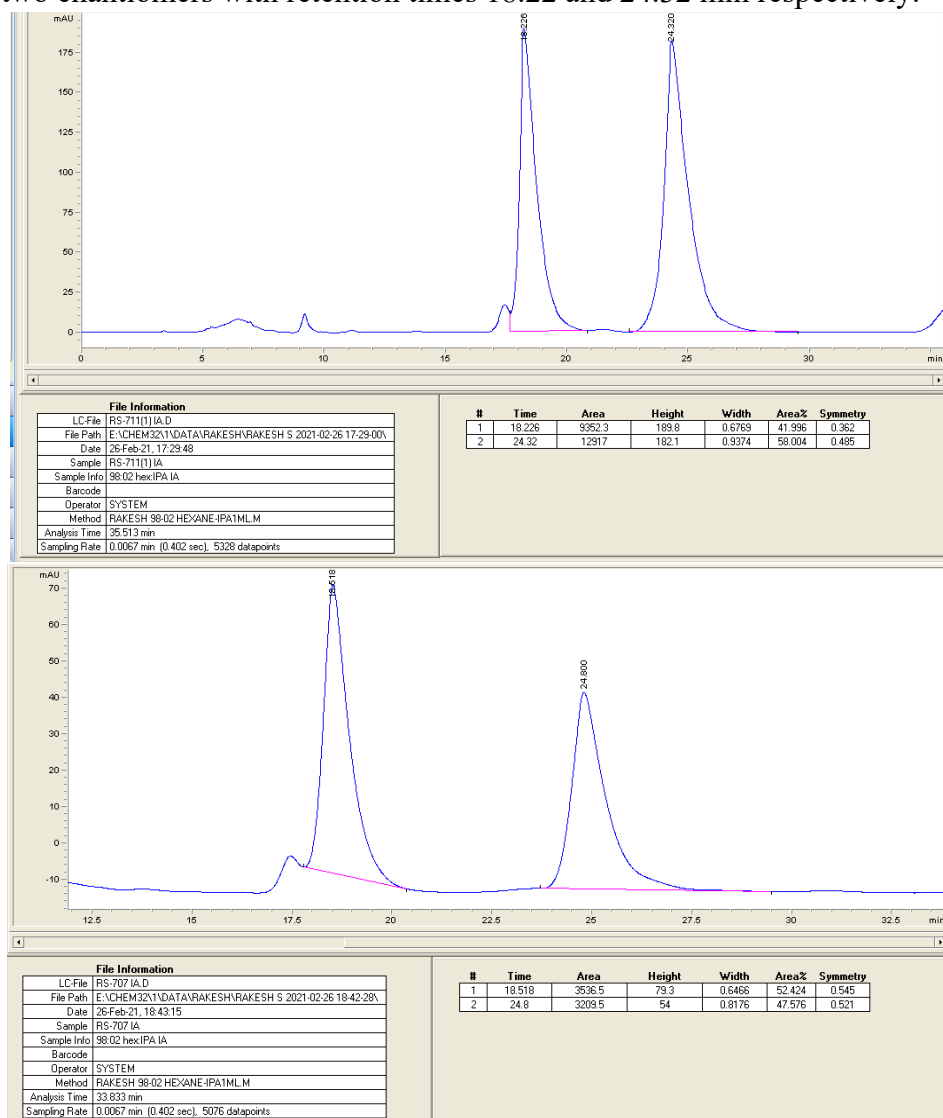

single\_pulse

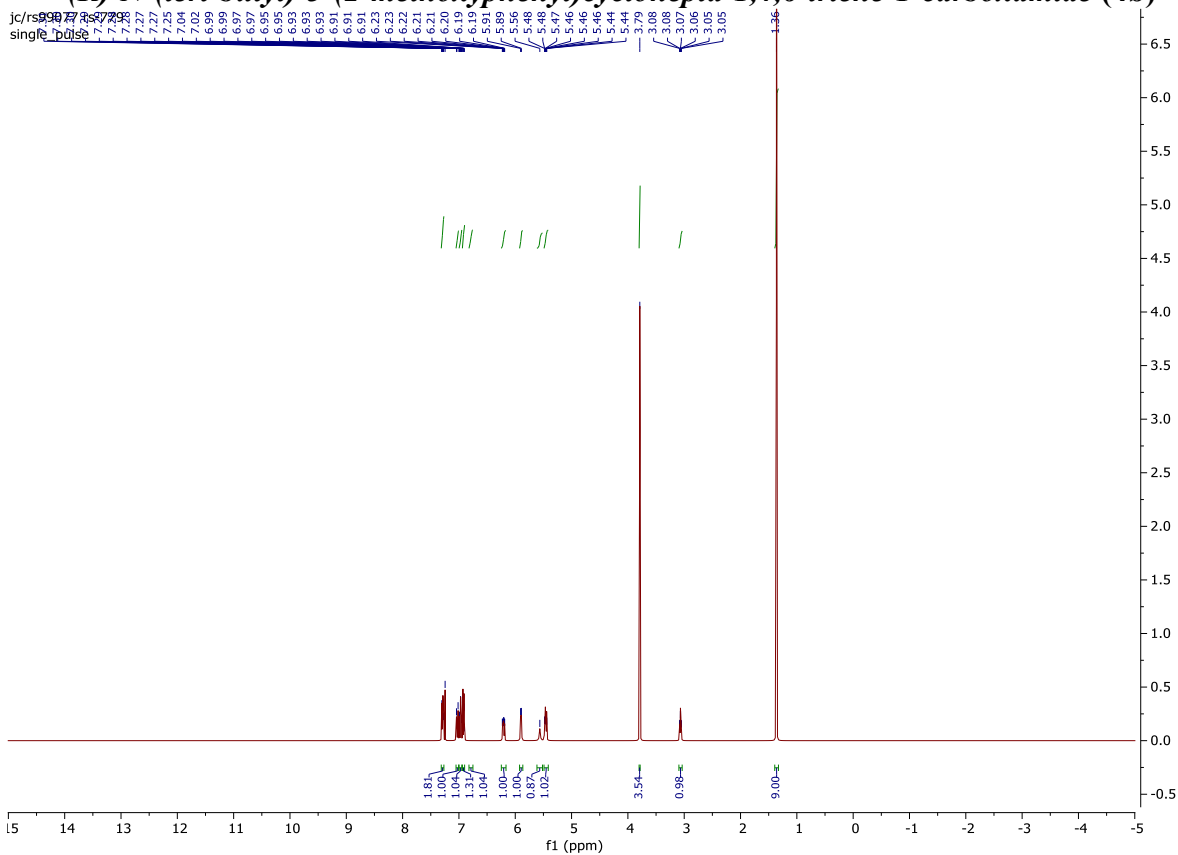

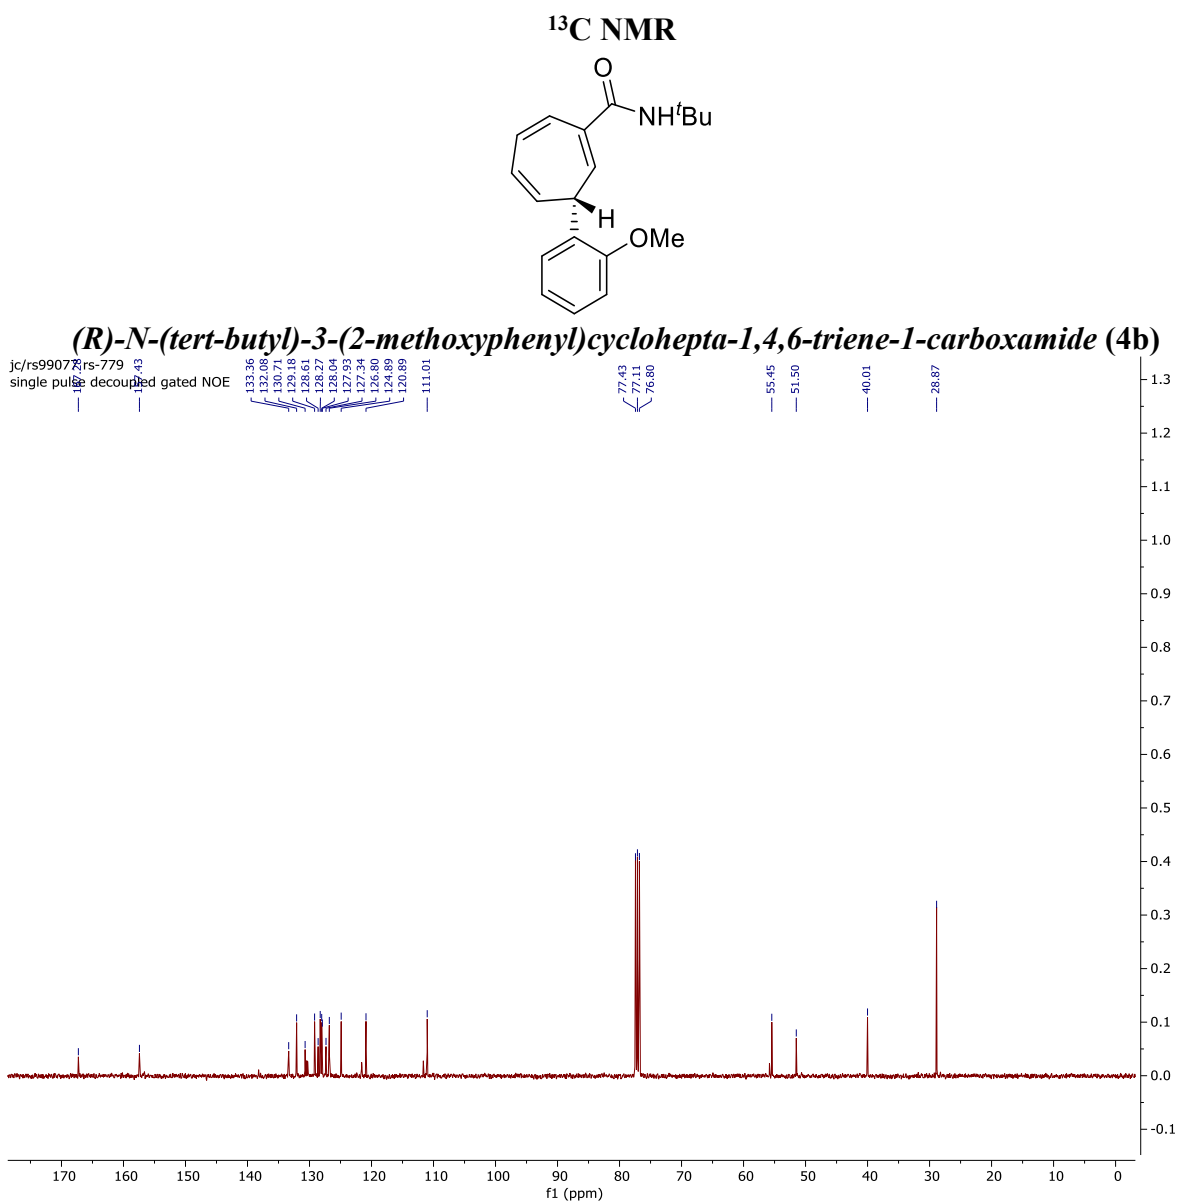

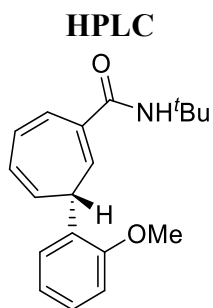

**(*R*)-*N*-(*tert*-butyl)-3-(2-methoxyphenyl)cyclohepta-1,4,6-triene-1-carboxamide (4b)**  
 Analytical HPLC (IA Column), eluting with hexane-IPA–(3:97), showed it to consist of 8:92 mixture of two enantiomers with retention times 8.93 mins (minor) and 10.11 mins (major), respectively.

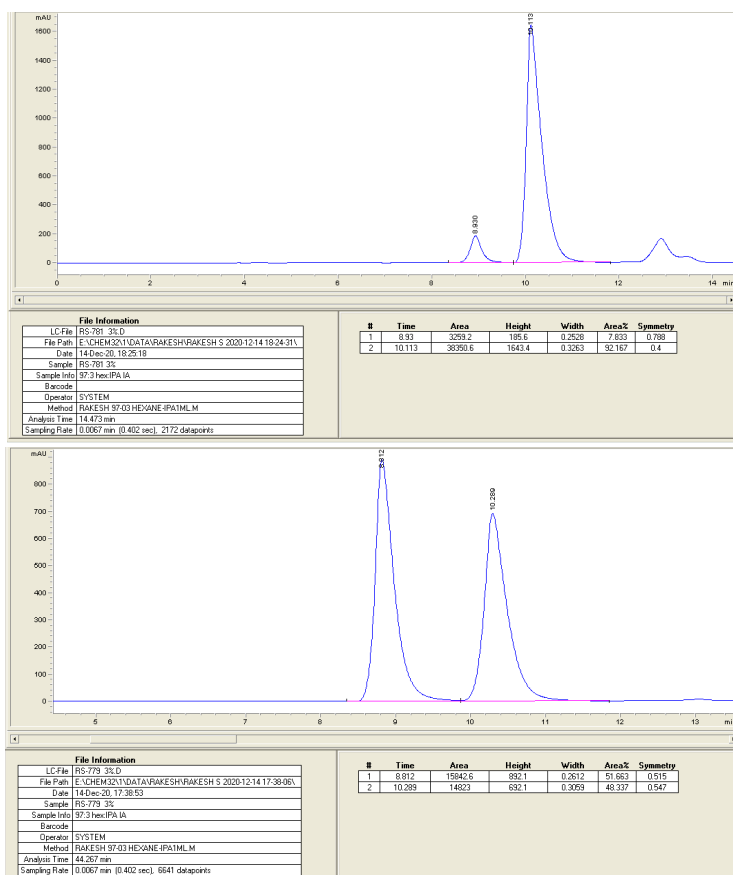

CC(C)(C)NC(=O)c1ccccc1[C@H](c2ccc(OC)cc2)C

[illegible]



**<sup>13</sup>C NMR**

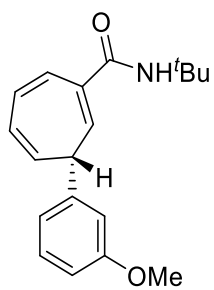

**(*R*)-*N*-(tert-butyl)-3-(3-methoxyphenyl)cyclohepta-1,4,6-triene-1-carboxamide (4c)**

jc/rs99003 rs-768rept  
single pulse decoupled gated NOE

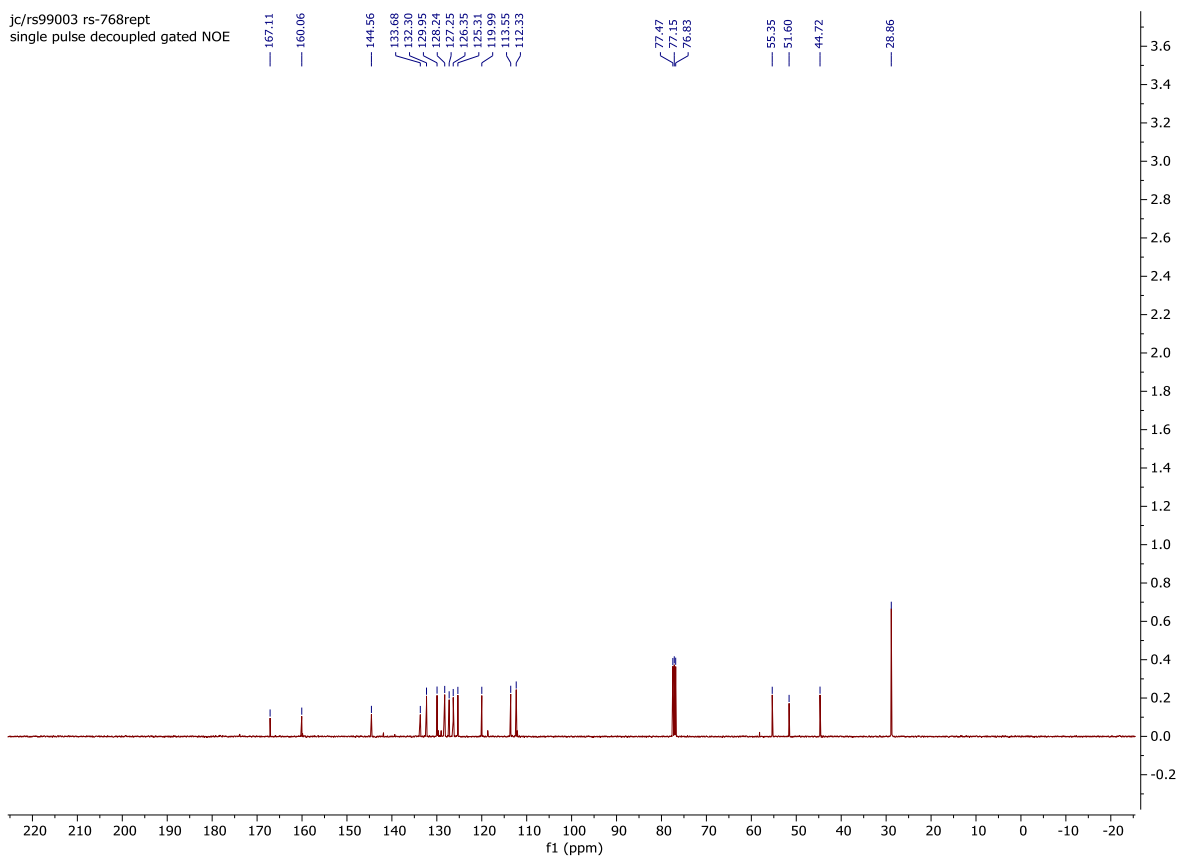

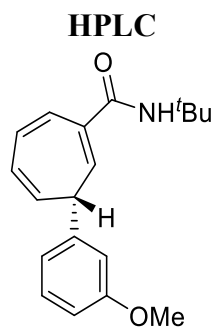

**(*R*)-*N*-(tert-butyl)-3-(3-methoxyphenyl)cyclohepta-1,4,6-triene-1-carboxamide (4c)**

**Analytical HPLC** (IA Column), eluting with hexane-IPA (99:1), showed it to consist of a 9:91 mixture of two enantiomers with retention times 14.11 mins(minor) and 19.42 mins (major), respectively

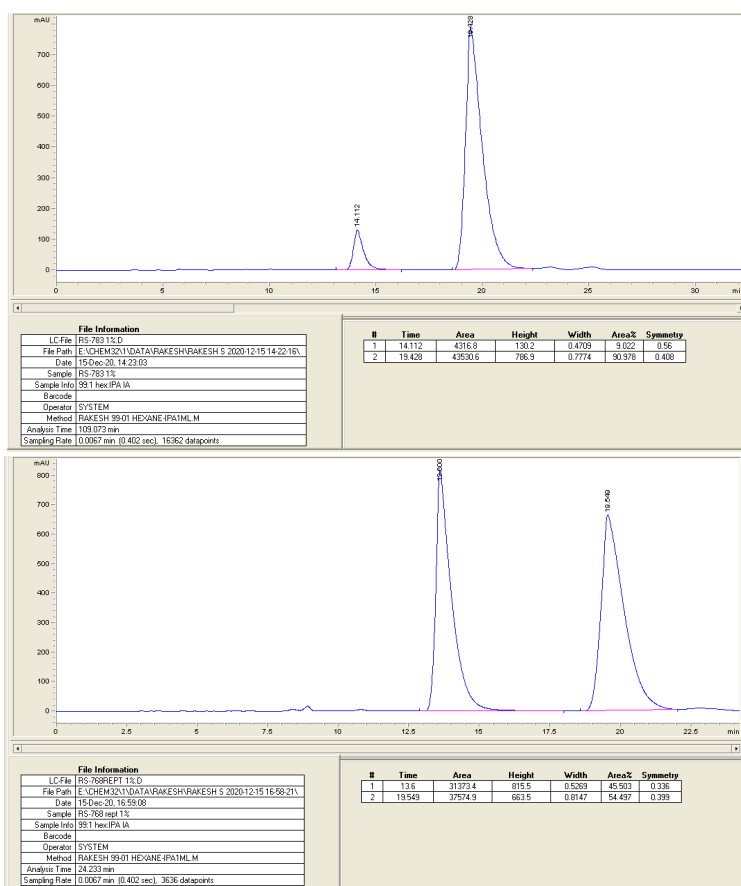



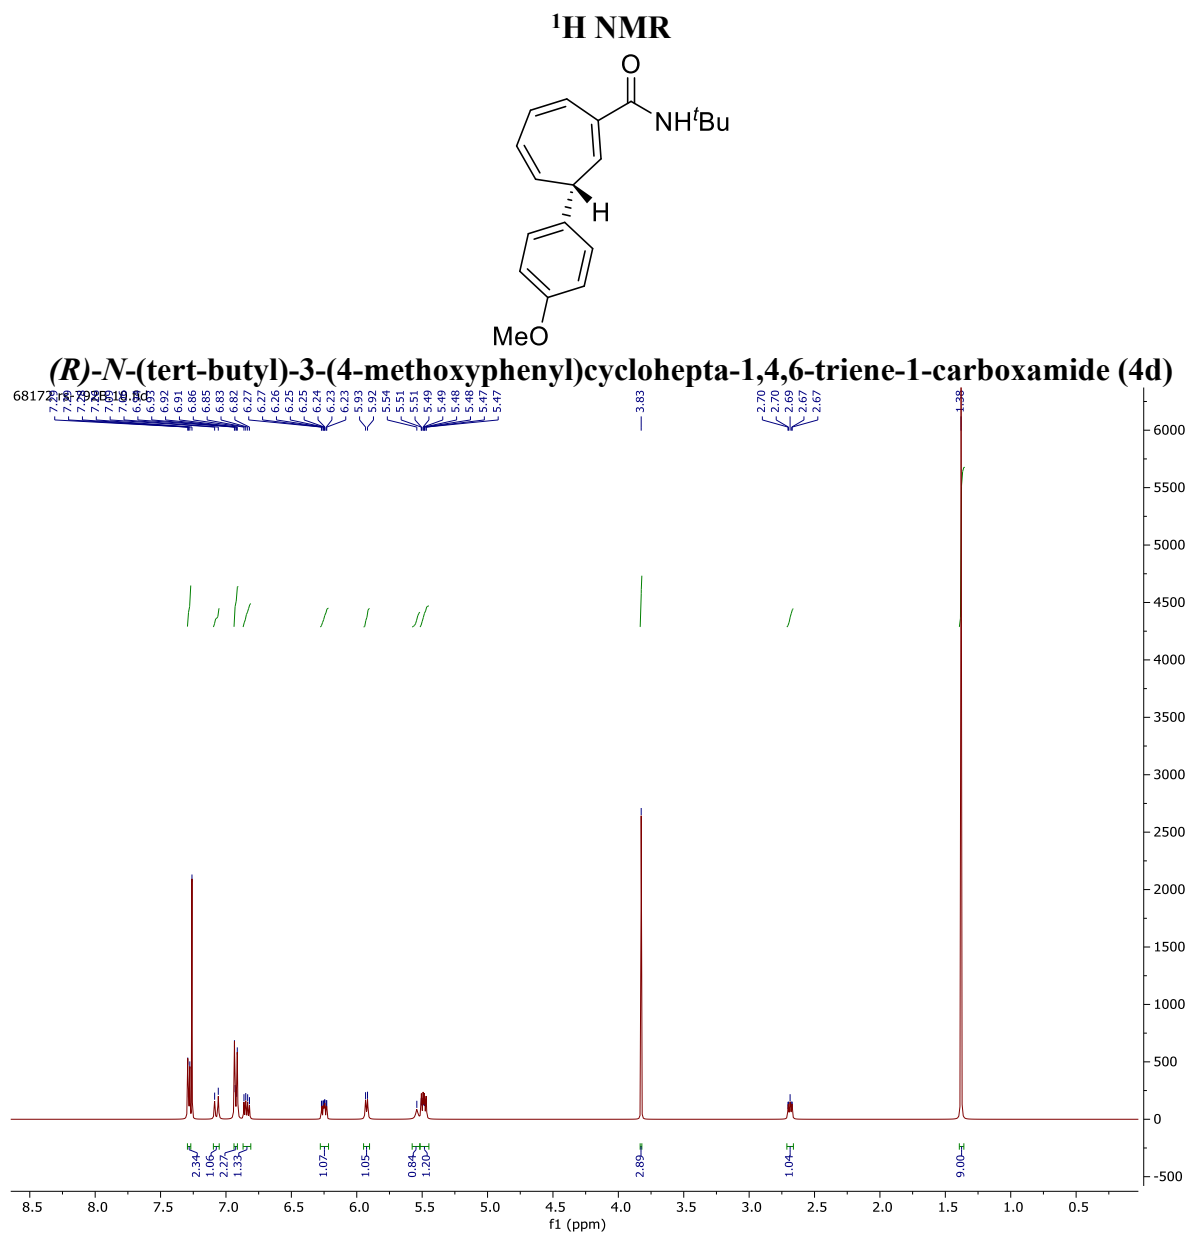

**$^{13}\text{C}$  NMR**

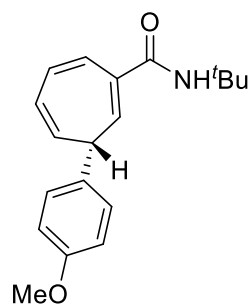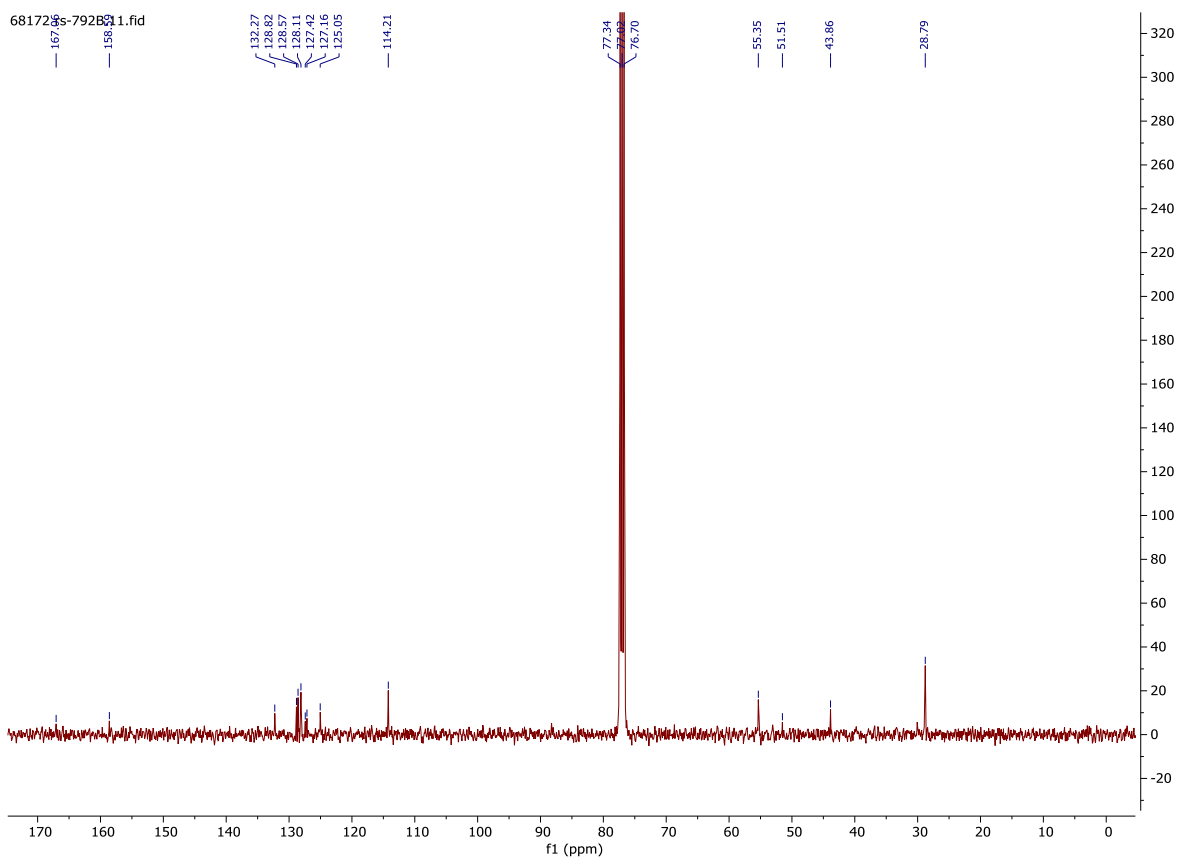

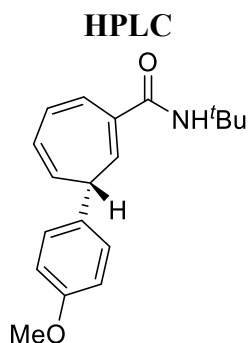

**(*R*)-*N*-(tert-butyl)-3-(4-methoxyphenyl)cyclohepta-1,4,6-triene-1-carboxamide (4d)**

**Analytical HPLC** (Chiral Regis Whelk O1), eluting with hexane-IPA (80:20), showed it to consist of a mixture of 23:77 two enantiomers with retention times  $t_R = 31.285$  mins(minor) and 40:568 mins (major) respectively.

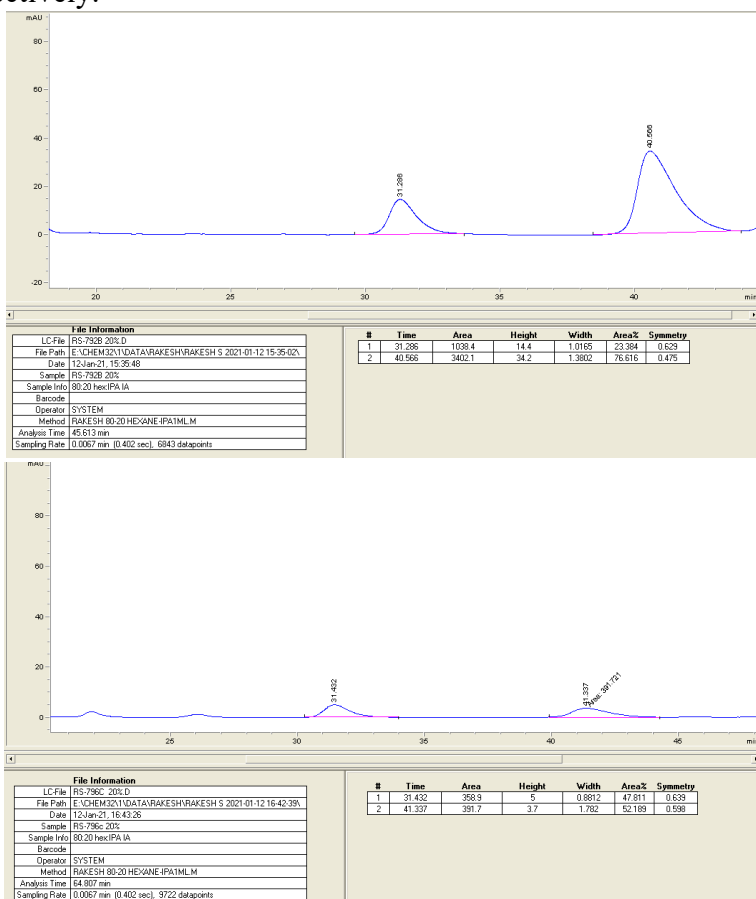

# **<sup>1</sup>H NMR**

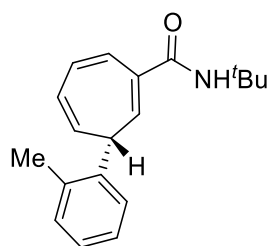

**(*R*)-*N*-(*tert*-butyl)-3-(*o*-tolyl)cyclohepta-1,4,6-triene-1-carboxamide (4e)**

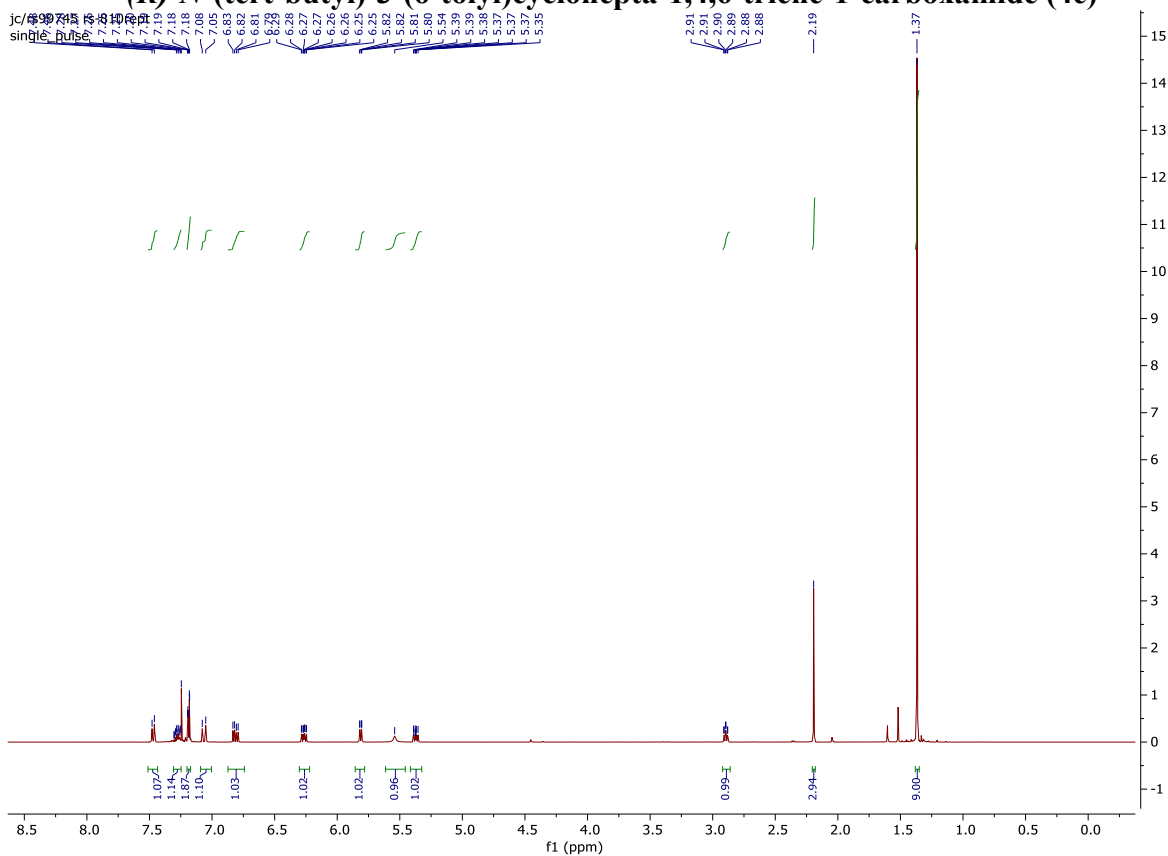

<sup>13</sup>C NMR

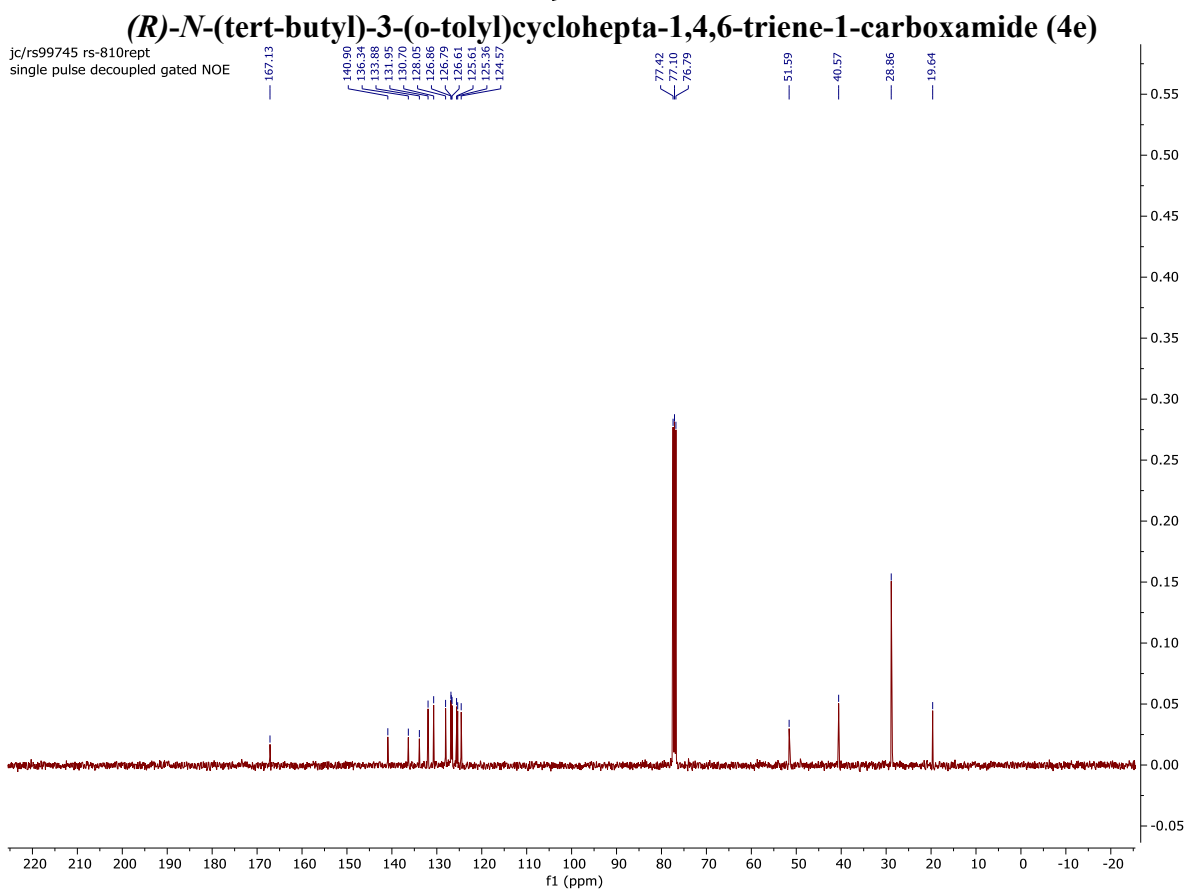



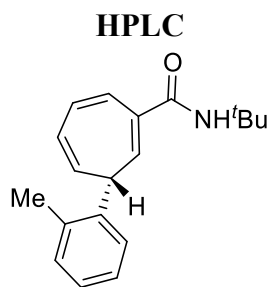

**(*R*)-*N*-(tert-butyl)-3-(*o*-tolyl)cyclohepta-1,4,6-triene-1-carboxamide (4e)**

**Analytical HPLC** (Chiral Regis Whelk O1), eluting with hexane- IPA (90:10), showed it to consist of a 20:80 mixture of two enantiomers with retention times 30.722 mins(minor) and 44.404 mins(major), respectively.

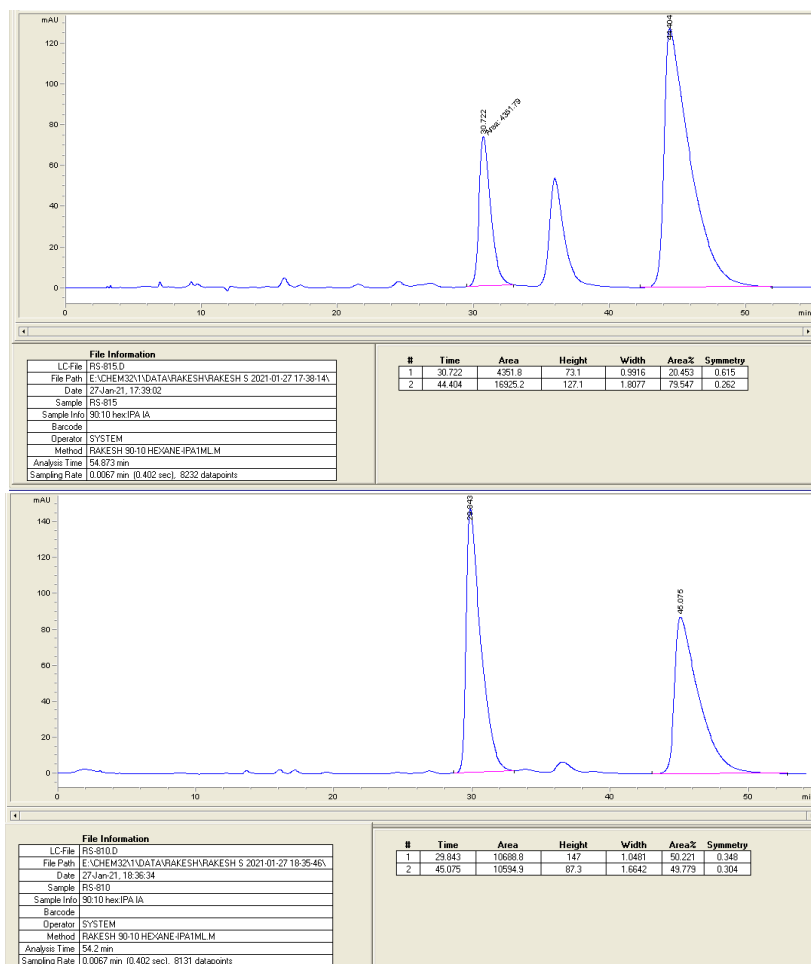

# **<sup>1</sup>H NMR**

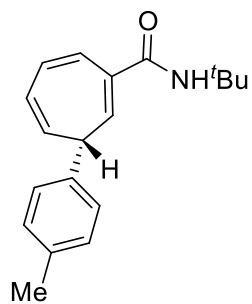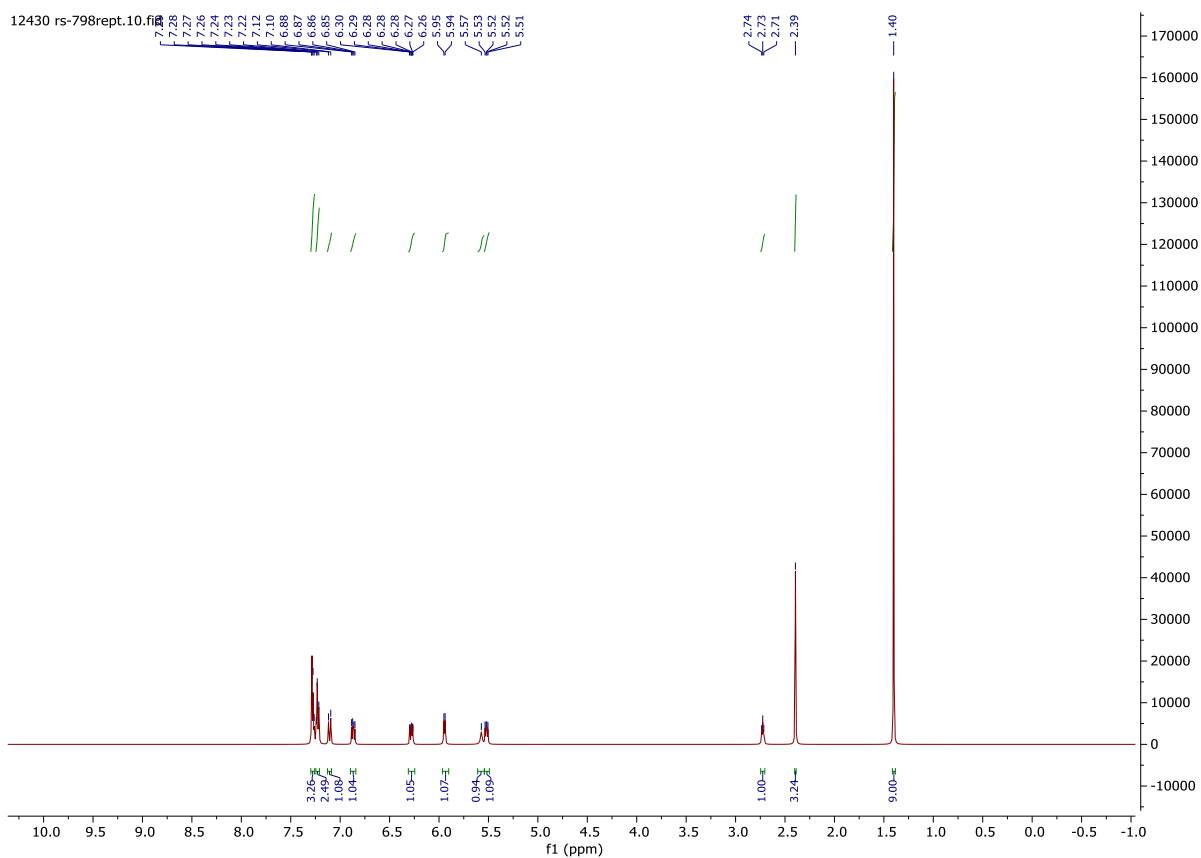

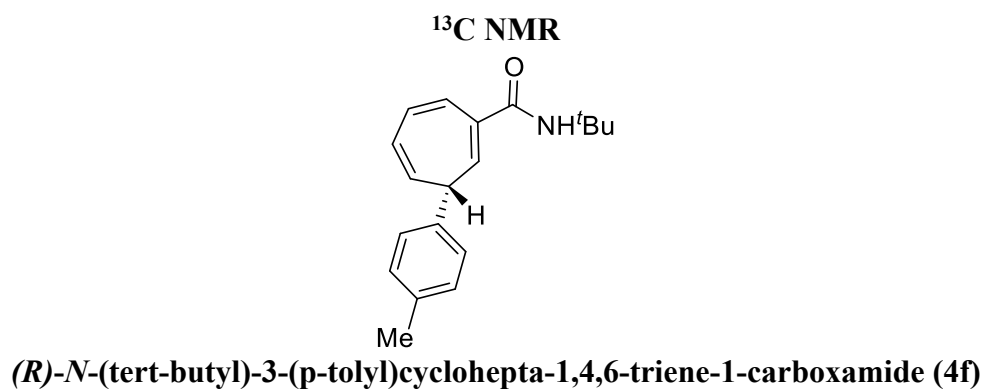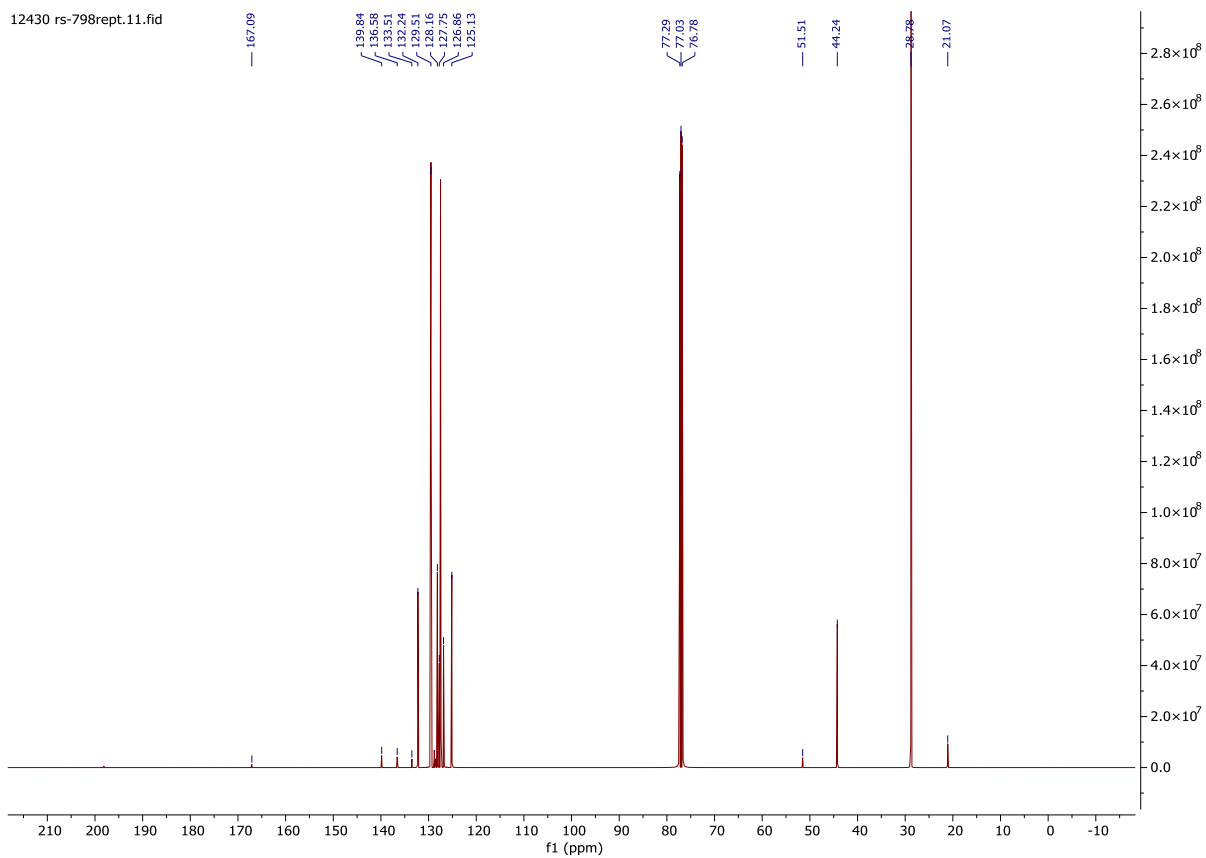

## HPLC

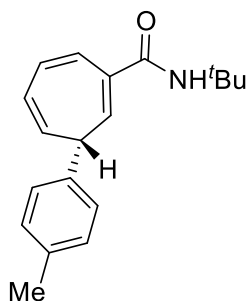

### (*R*)-*N*-(tert-butyl)-3-(p-tolyl)cyclohepta-1,4,6-triene-1-carboxamide (4f)

**Analytical HPLC** (IA Column), eluting with hexane- IPA (99:1), showed it to consist of a 4:96 mixture of two enantiomers with retention times 10.271 mins(minor) and 12.86 mins (major), respectively.

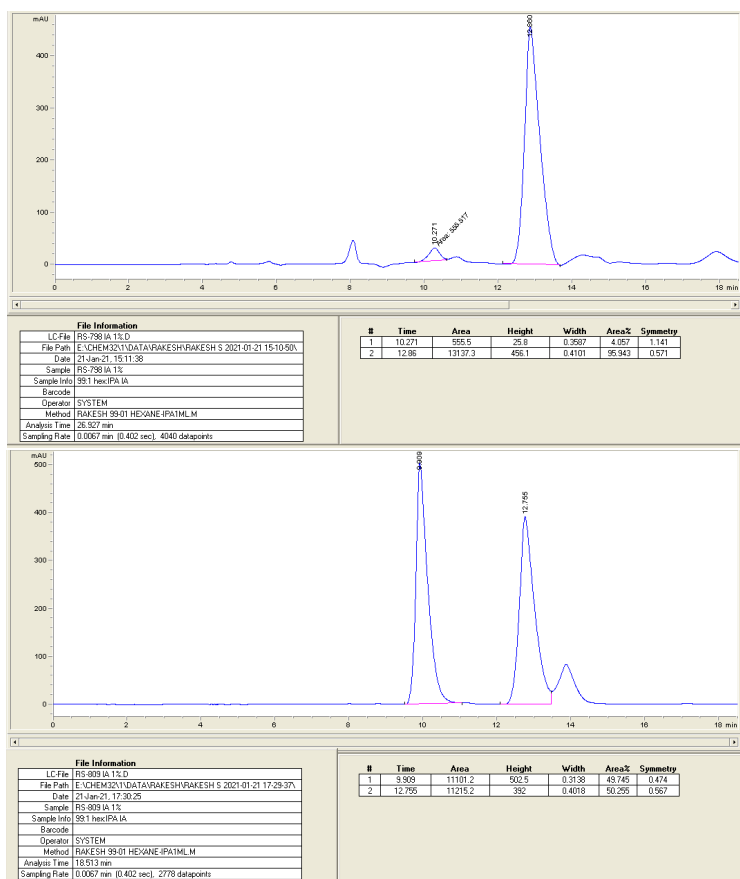

<sup>1</sup>H NMR

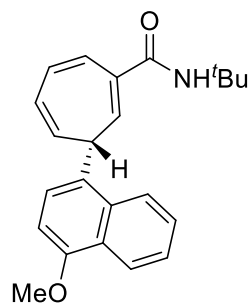

(R)-N-(tert-butyl)-3-(4-methoxynaphthalen-1-yl)cyclohepta-1,4,6-triene-1-carboxamide (4g)

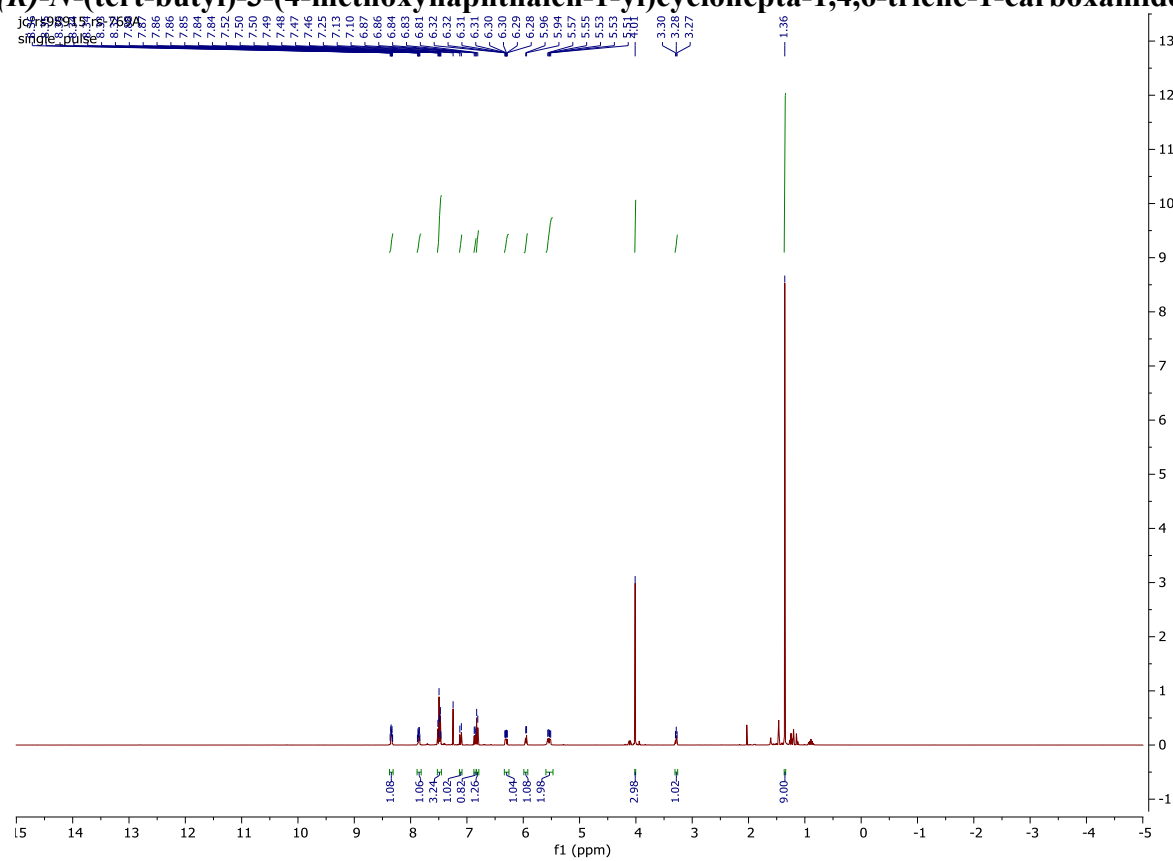

**$^{13}\text{C}$  NMR**

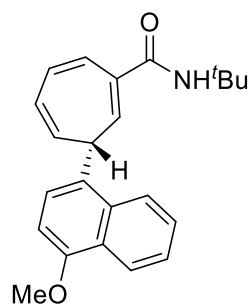

**(R)-N-(tert-butyl)-3-(4-methoxynaphthalen-1-yl)cyclohepta-1,4,6-triene-1-carboxamide (4g)**

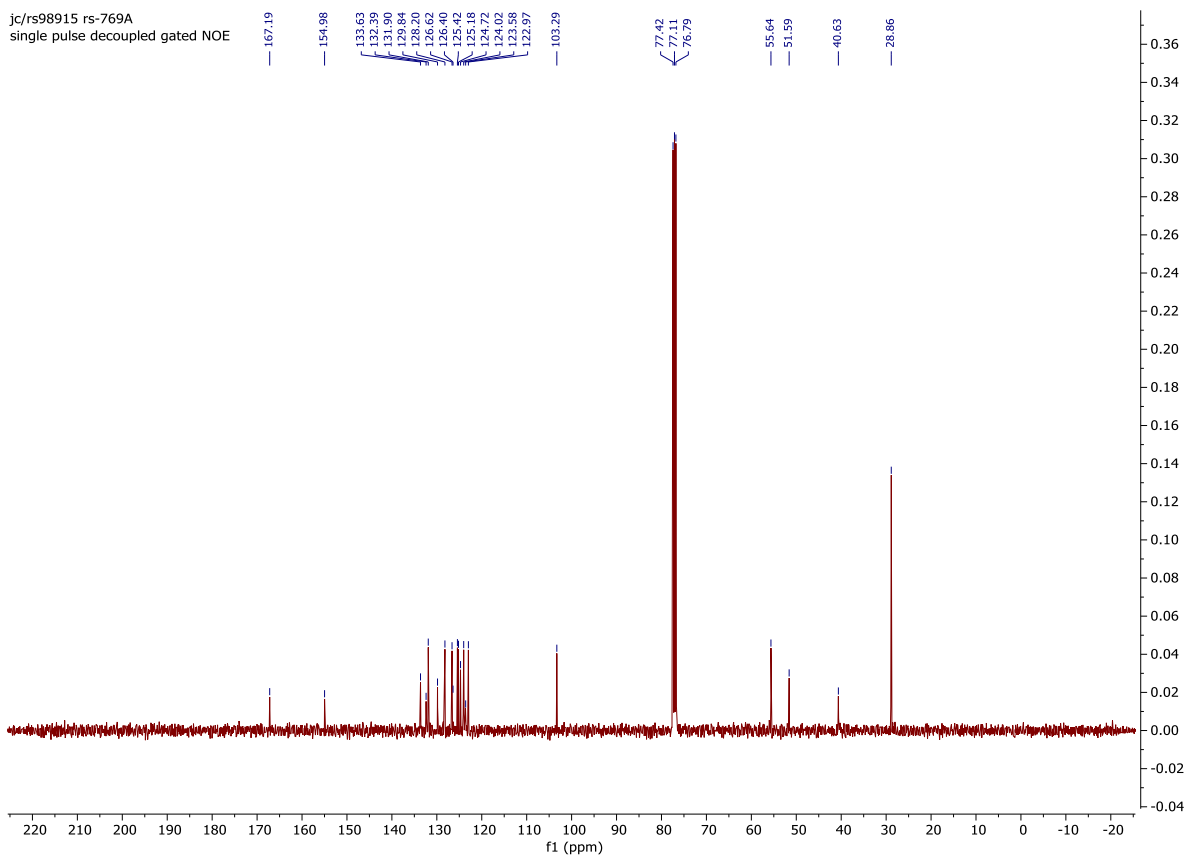

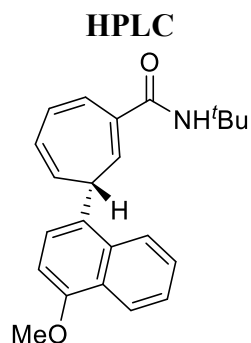

**(*R*)-*N*-(tert-butyl)-3-(4-methoxynaphthalen-1-yl)cyclohepta-1,4,6-triene-1-carboxamide (4g)**

**Analytical HPLC** (Chiral Regis Whelk O1), eluting with hexane-IPA (15:85), showed it to consist of a 5.79:94.210 mixture of two enantiomers with retention times 32.273 mins (minor) and 40.017 mins (major).

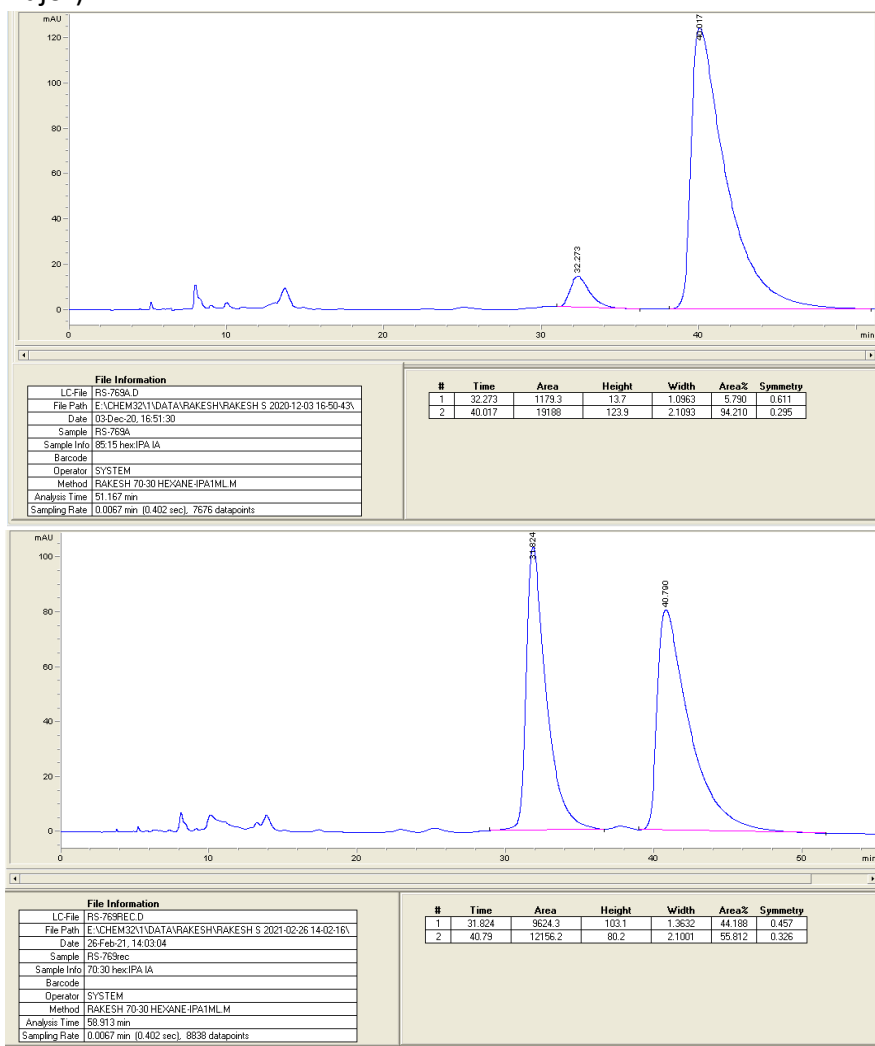

# <sup>1</sup>H NMR

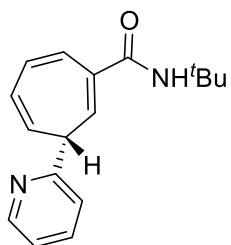

**(R)-N-(tert-butyl)-3-(pyridin-2-yl)cyclohepta-1,4,6-triene-1-carboxamide (4h)**

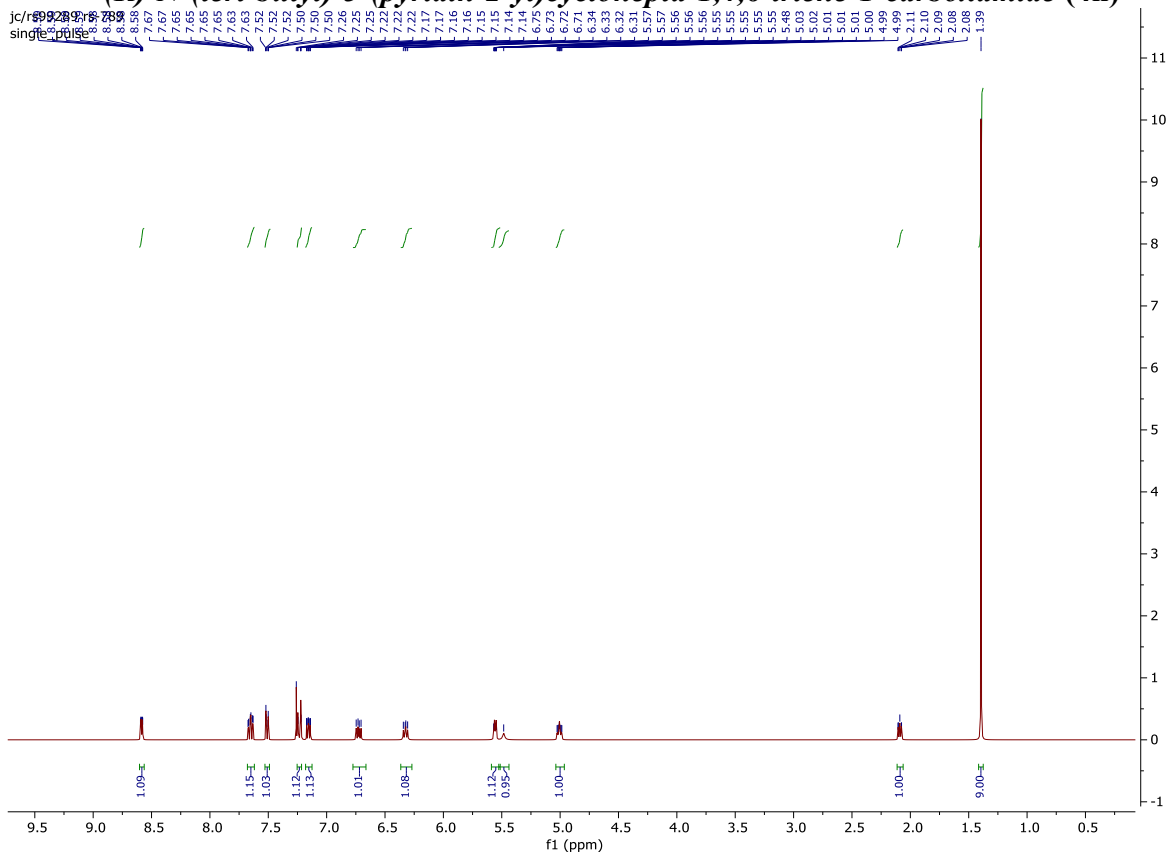



<sup>13</sup>C NMR

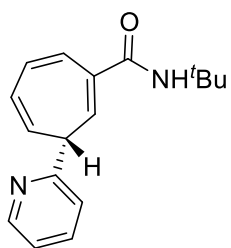

**(R)-N-(tert-butyl)-3-(pyridin-2-yl)cyclohepta-1,4,6-triene-1-carboxamide (4h)**

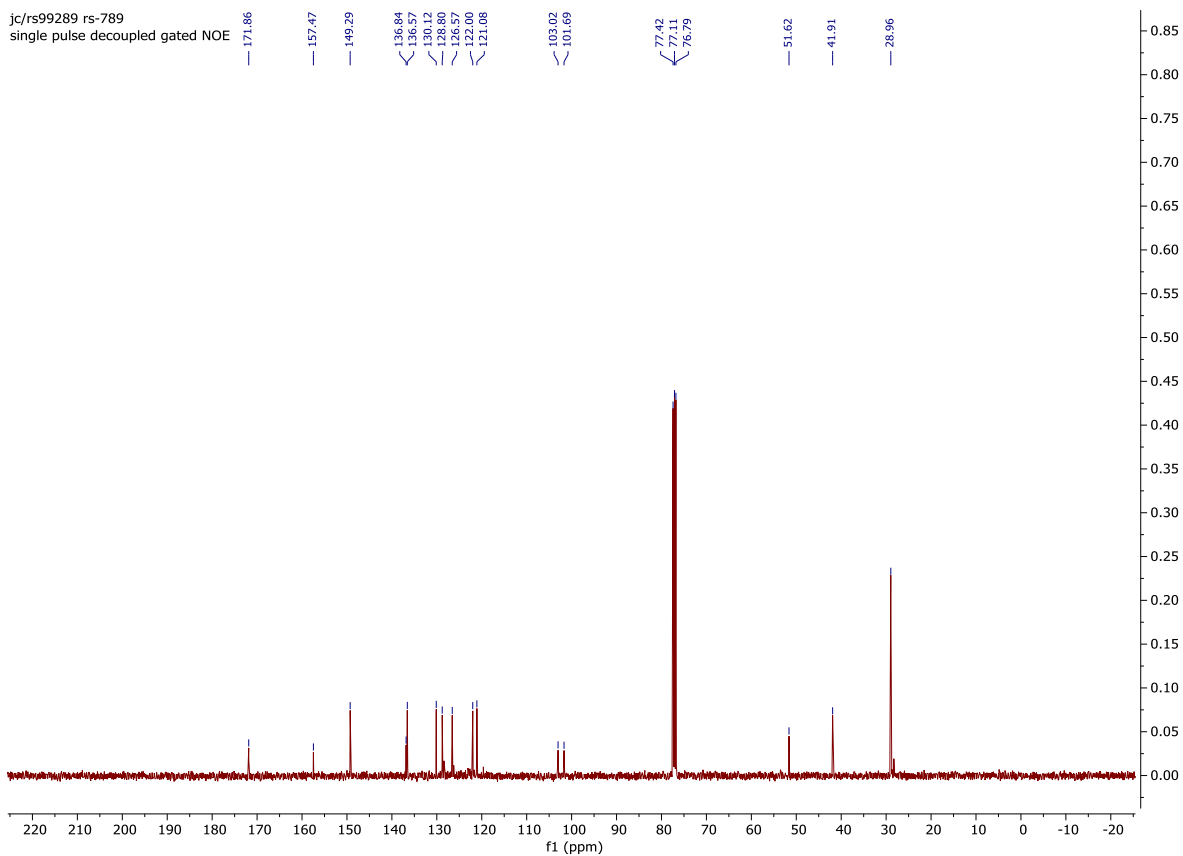

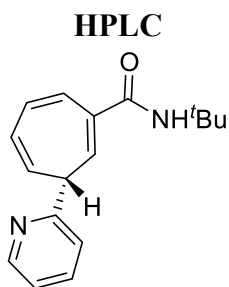

***(R)*-N-(tert-butyl)-3-(pyridin-2-yl)cyclohepta-1,4,6-triene-1-carboxamide (4h)**

**Analytical HPLC** (Chiral Regis Wheelk O1), eluting with IPA–hexane (85:15), showed it to consist of a 39:61 mixture of two enantiomers with retention times 20.987 mins(minor) and 22.505 mins (major), respectively.

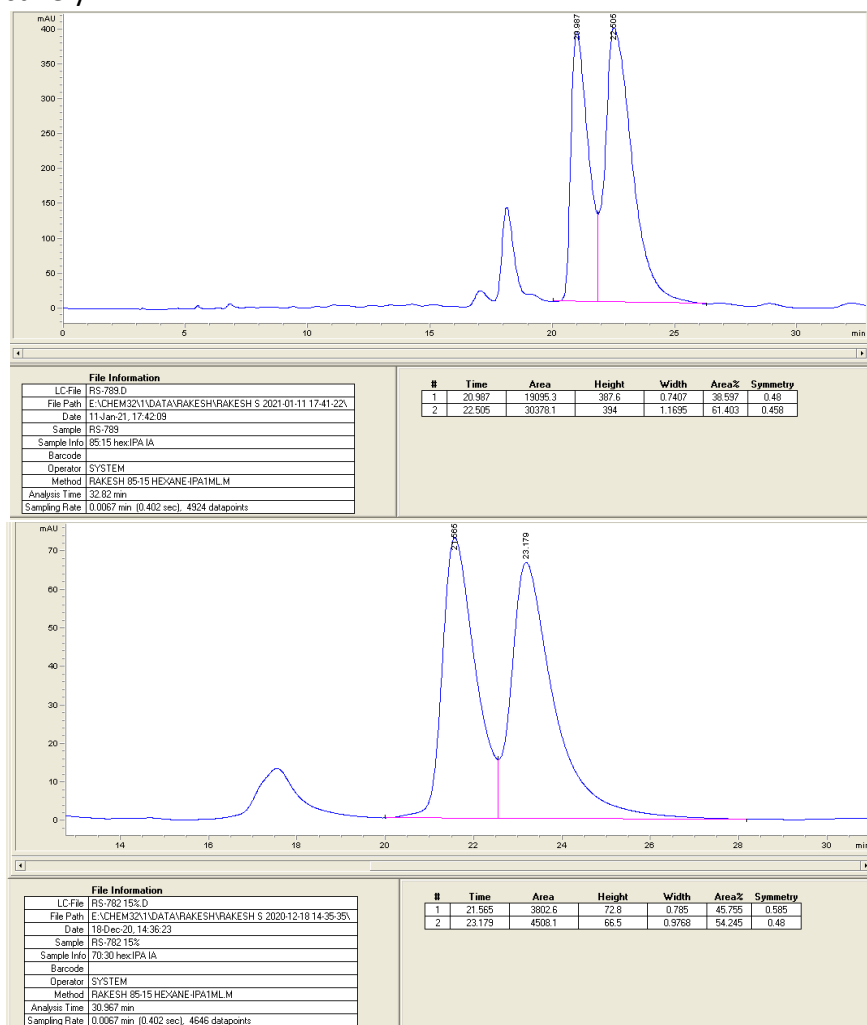

**<sup>1</sup>H NMR**

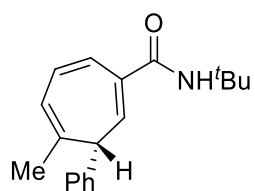

**(S)-N-(tert-butyl)-4-methyl-3-phenylcyclohepta-1,4,6-triene-1-carboxamide (4i)**

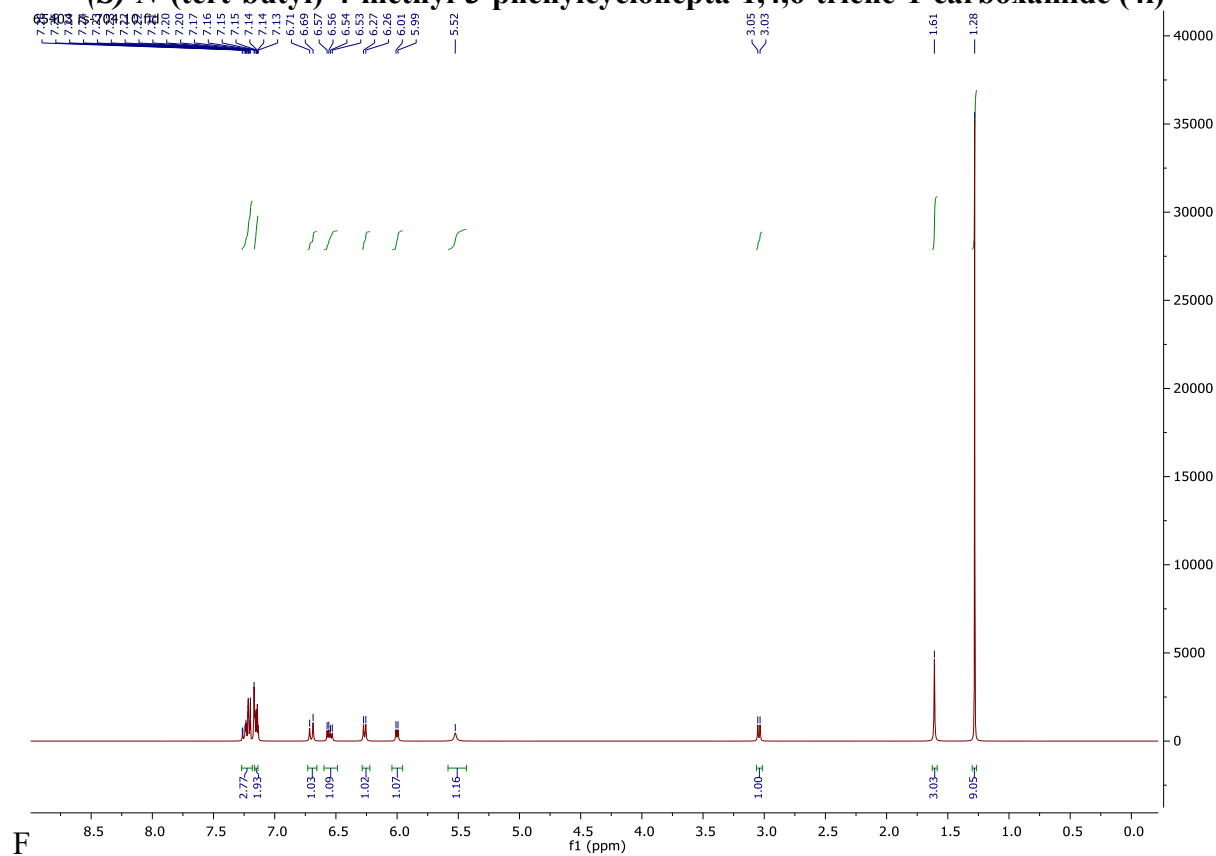

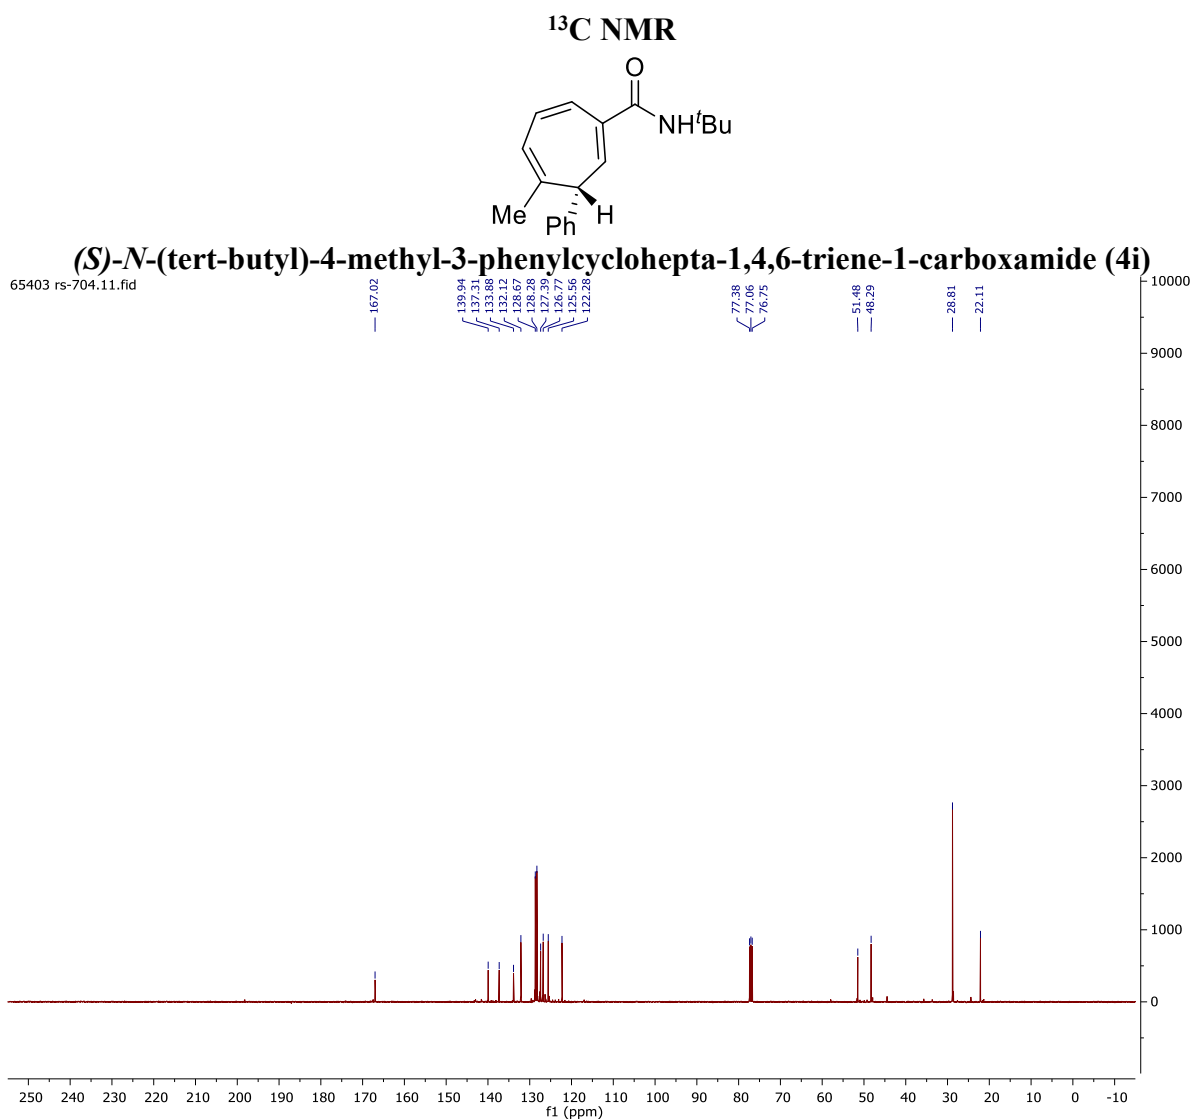

# HPLC

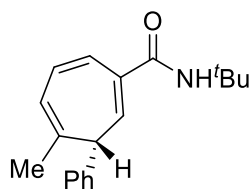

**(S)-N-(tert-butyl)-4-methyl-3-phenylcyclohepta-1,4,6-triene-1-carboxamide (4i)**

**Analytical HPLC** (Chiral Regis Whelk O1), eluting with hexane- IPA (70:30), showed it to consist of a 5.3: 94:6 mixture of two enantiomers with retention times 21.53 mins (minor) and 29.20 mins (major) respectively.

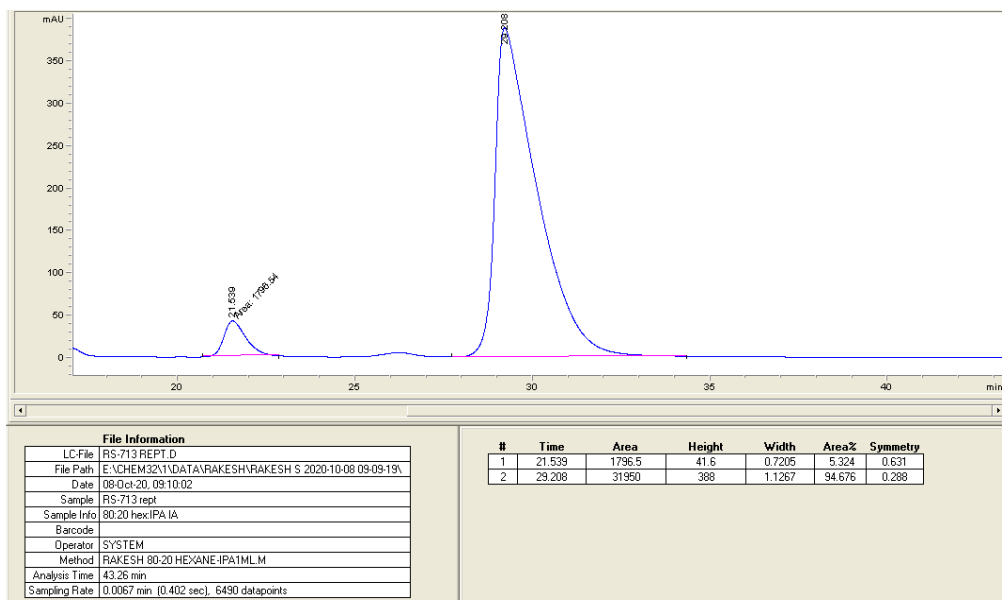

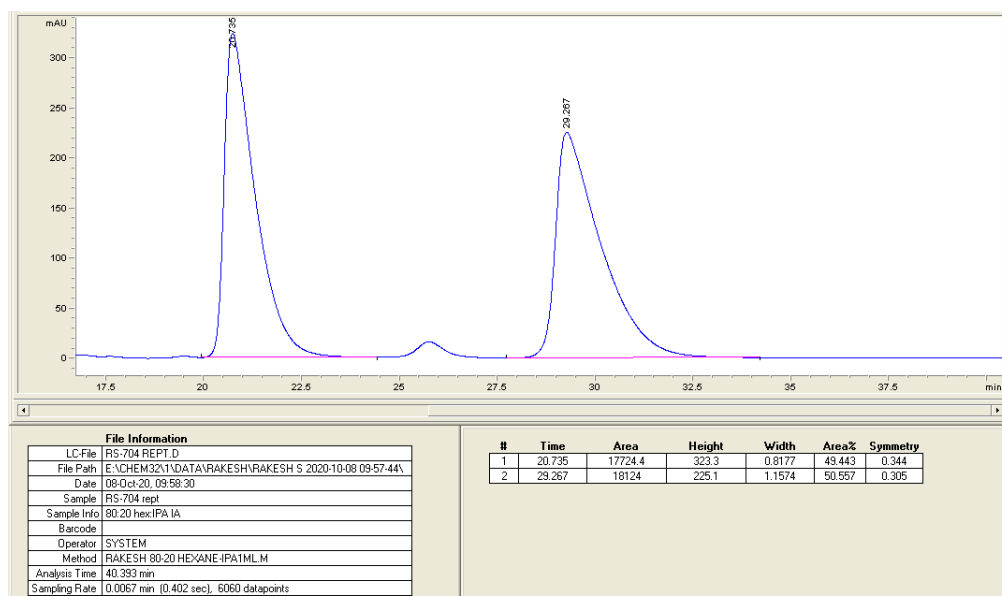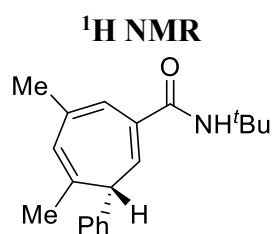

**(S)-N-(tert-butyl)-4,6-dimethyl-3-phenylcyclohepta-1,4,6-triene-1-carboxamide (4j)**

65453 rs-706.10.fid

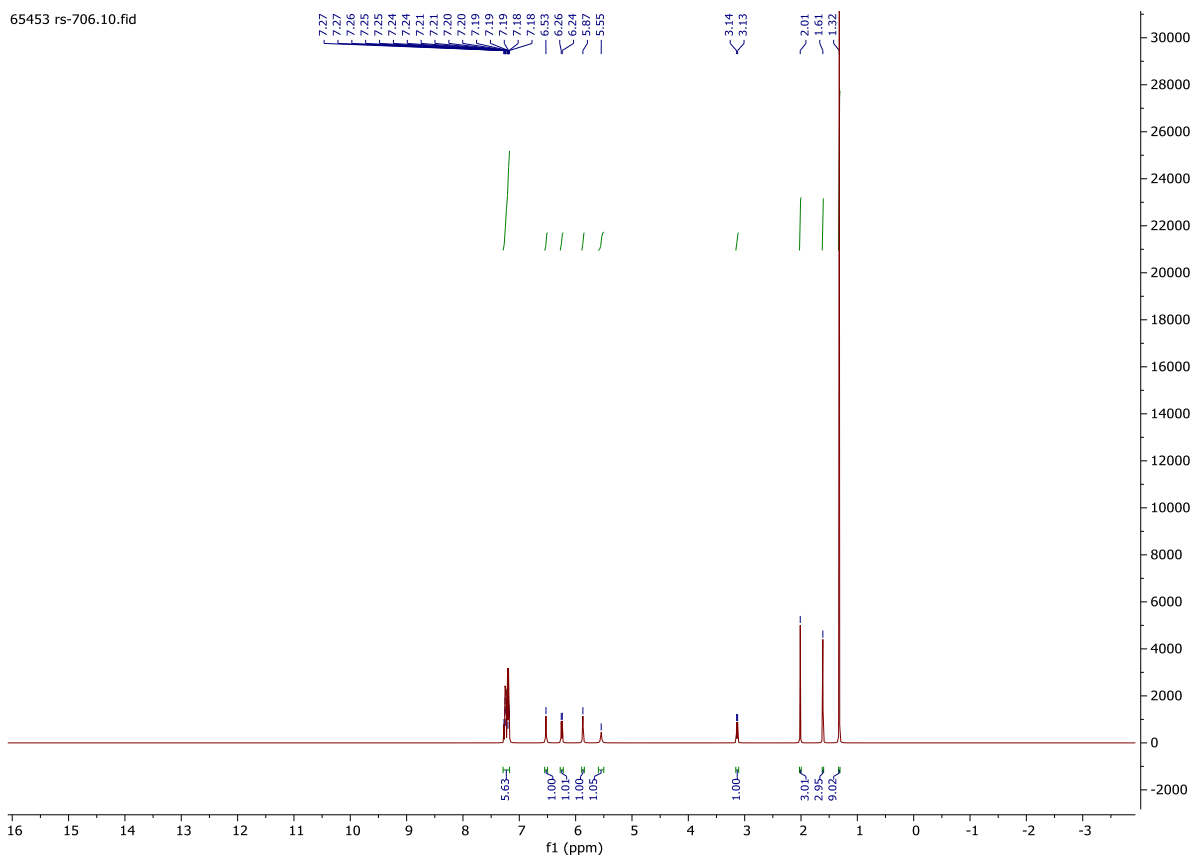

**<sup>13</sup>C NMR**

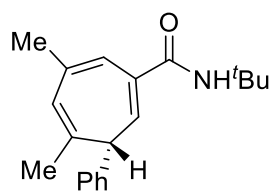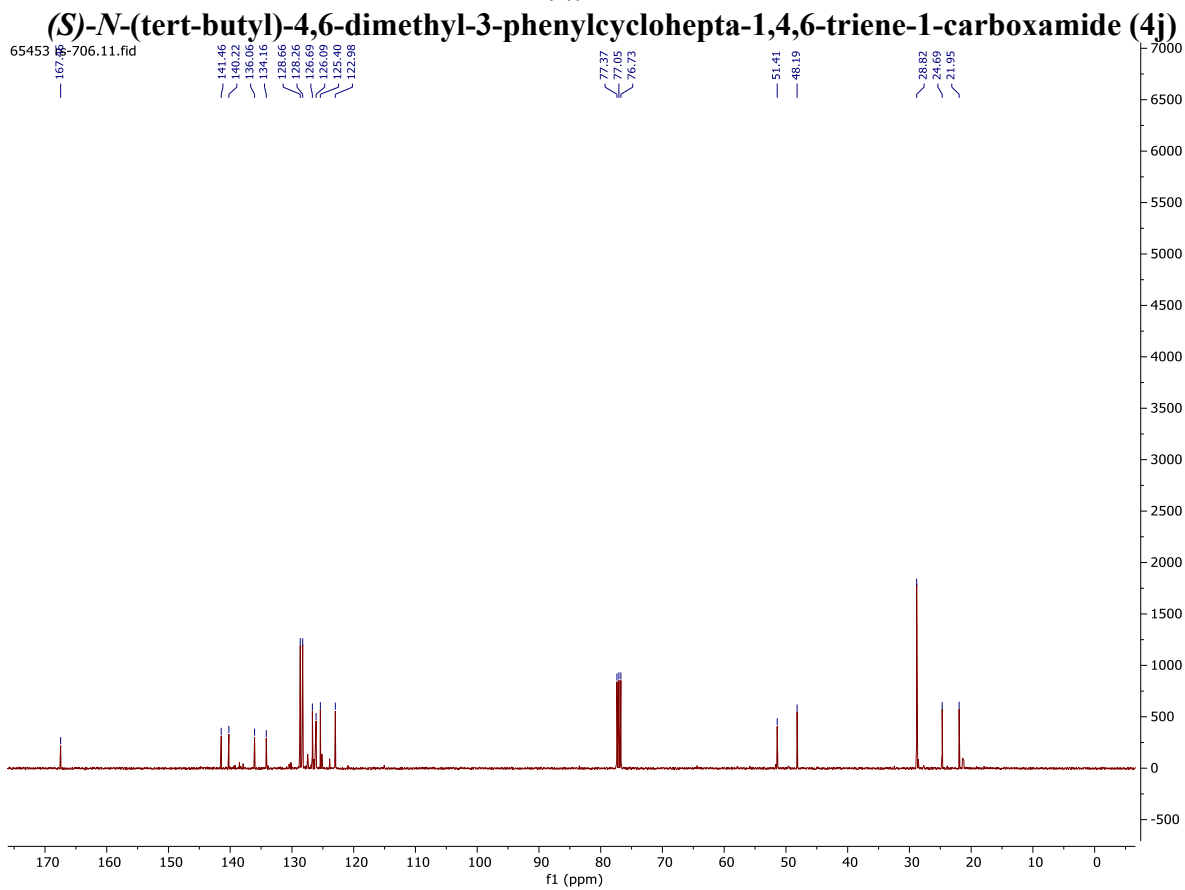



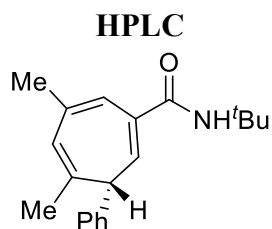

**(S)-N-(tert-butyl)-4,6-dimethyl-3-phenylcyclohepta-1,4,6-triene-1-carboxamide (4j)**

**Analytical HPLC** (Chiral Regis Whelk O1), eluting with hexane-IPA (70:30), showed it to consist of a 29.00: 70.99 mixture of two enantiomers with retention times  $t_R = 10.41$  and  $11.99$  respectively.

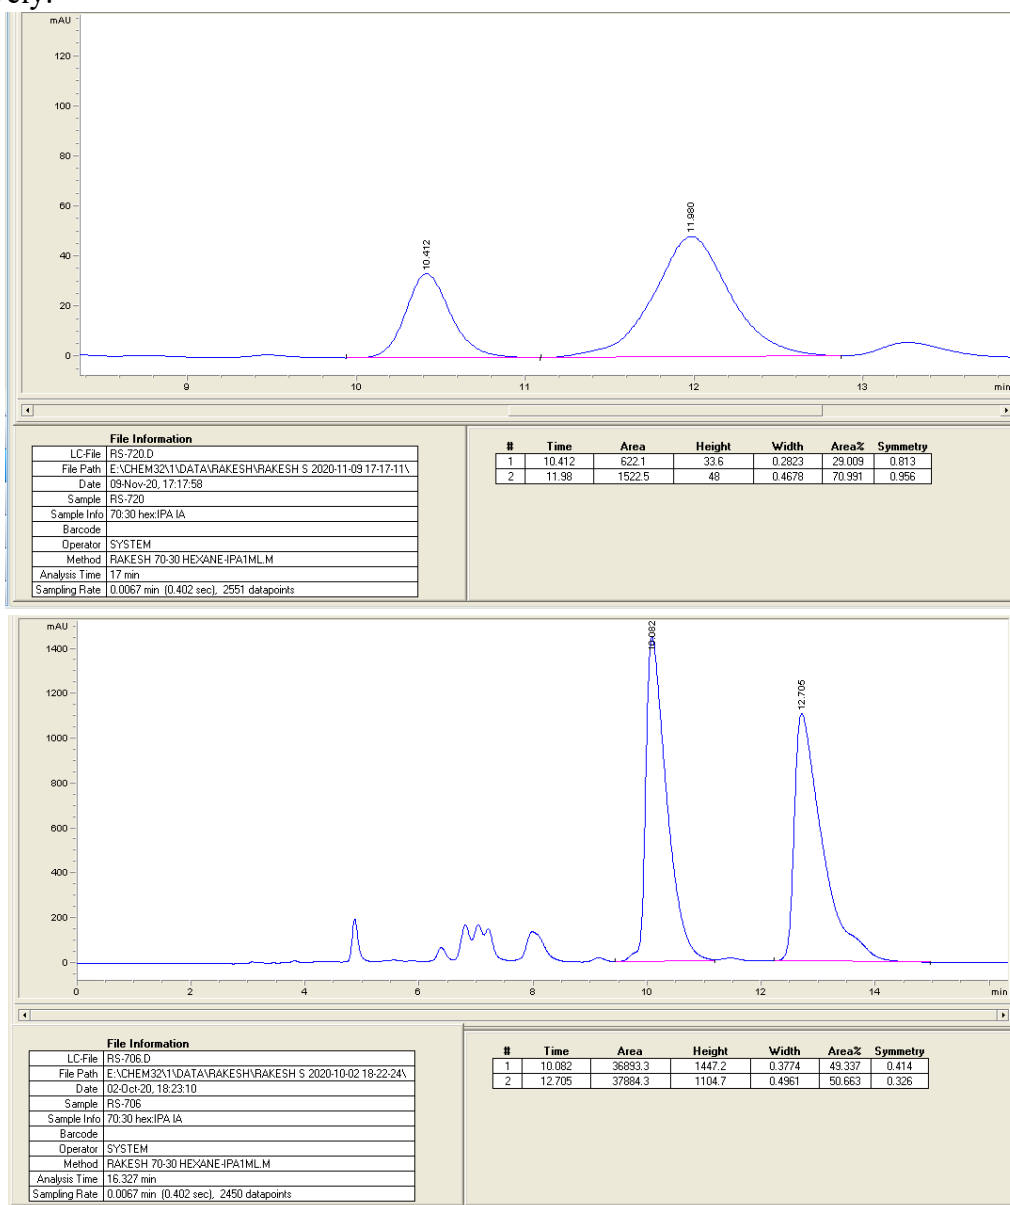

**<sup>1</sup>H NMR**

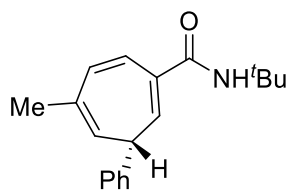

**(R)-N-(tert-butyl)-5-methyl-3-phenylcyclohepta-1,4,6-triene-1-carboxamide (4k)**

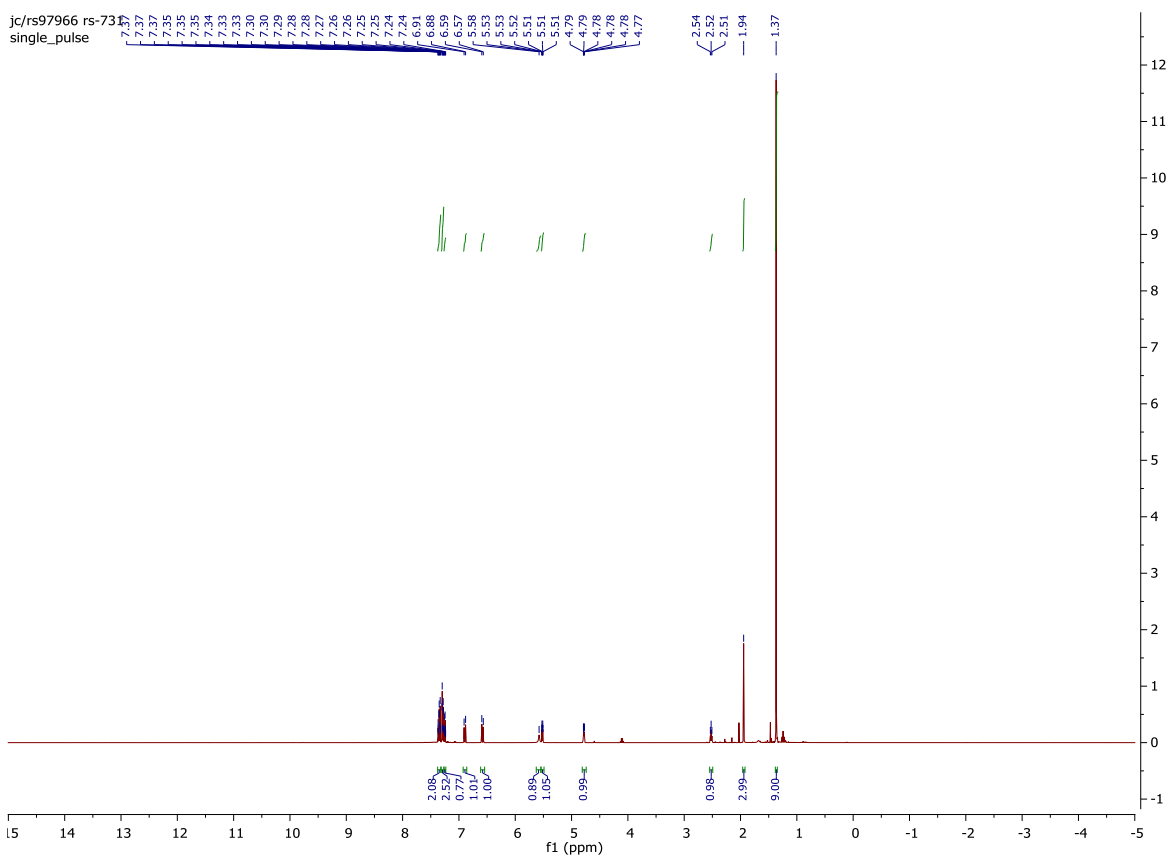

<sup>13</sup>C NMR

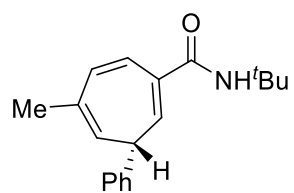

**(*R*)-*N*-(tert-butyl)-5-methyl-3-phenylcyclohepta-1,4,6-triene-1-carboxamide (4k)**

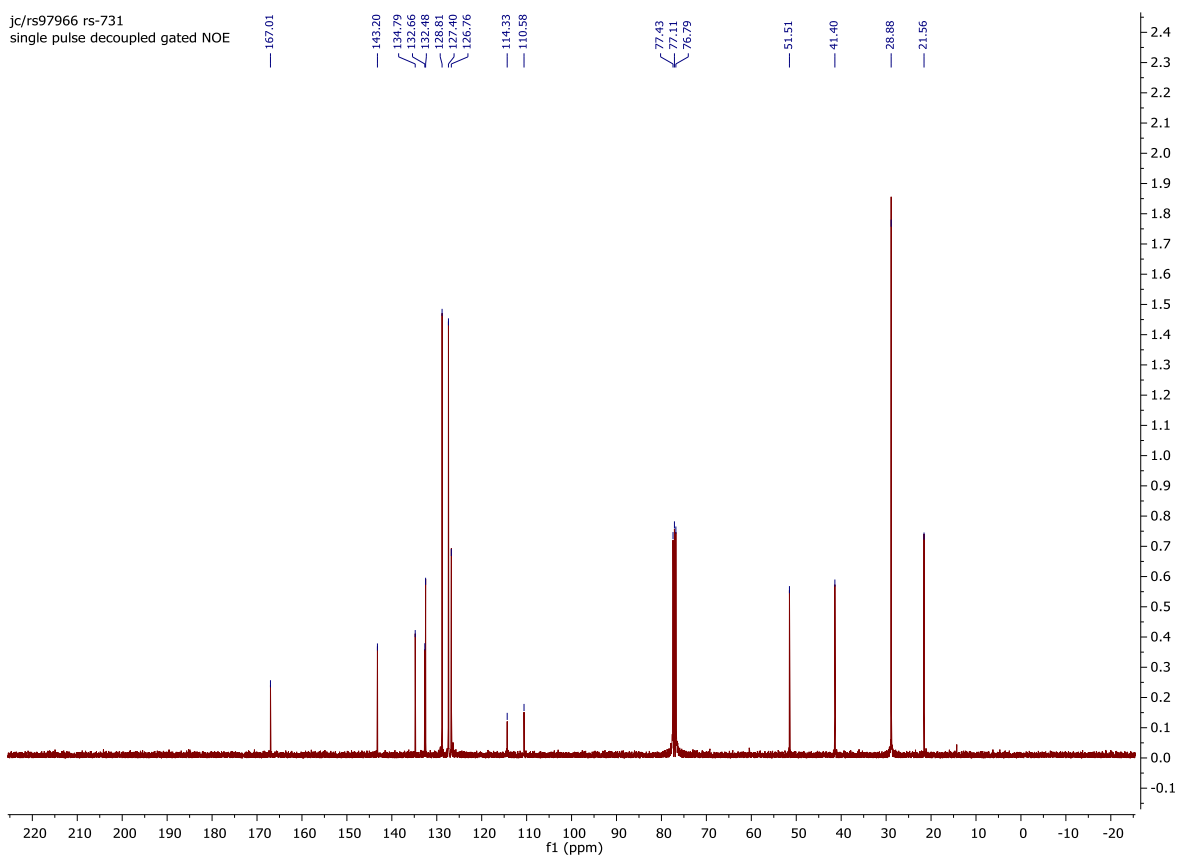

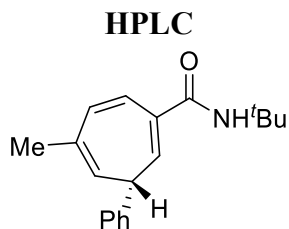

**(*R*)-*N*-(tert-butyl)-5-methyl-3-phenylcyclohepta-1,4,6-triene-1-carboxamide (4k)**

**Condition 1: Analytical HPLC** (Chiral Regis Whelk O1), eluting with hexane-IPA (70:30), showed it to consist of a 12:88 mixture of two enantiomers with retention times 10.44 mins (minor) and 16.60 min (major) respectively.

**Condition 2: Analytical HPLC** (Chiral Regis Whelk O1), eluting with hexane-IPA (70:30), showed it to consist of a 20:80 mixture of two enantiomers with retention times 9.88 mins (minor) and 16.17 min (major) respectively.

**Condition 1:**

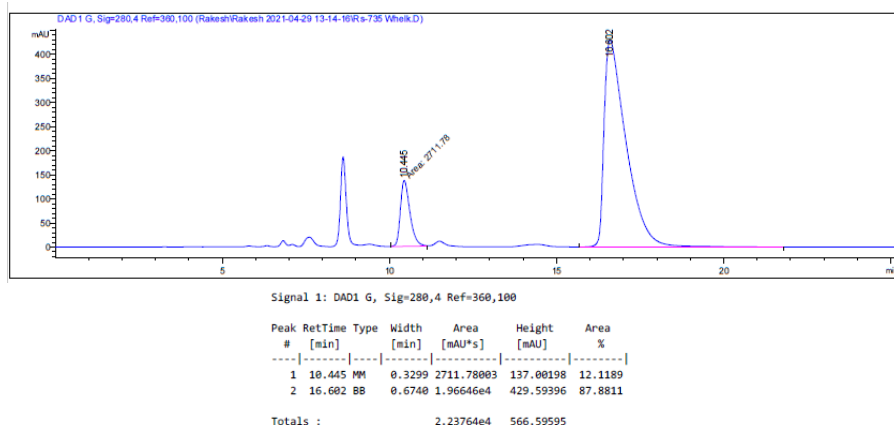

**Condition 2:**

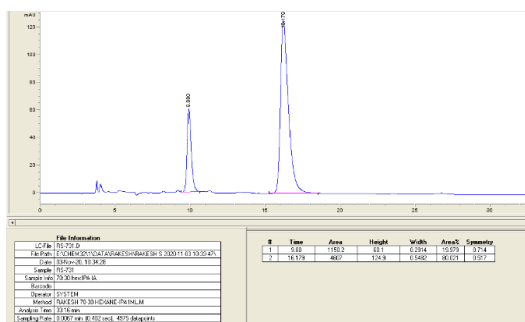

*rec-*

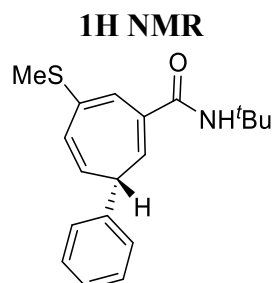[illegible]

<sup>13</sup>C NMR

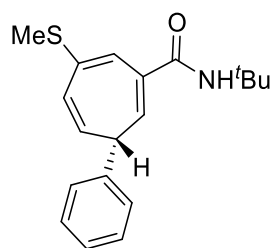

**(*R*)-*N*-(tert-butyl)-6-(methylthio)-3-phenylcyclohepta-1,4,6-triene-1-carboxamide (4l)**

jc/rs99917 rs-819A  
single pulse decoupled gated NOE

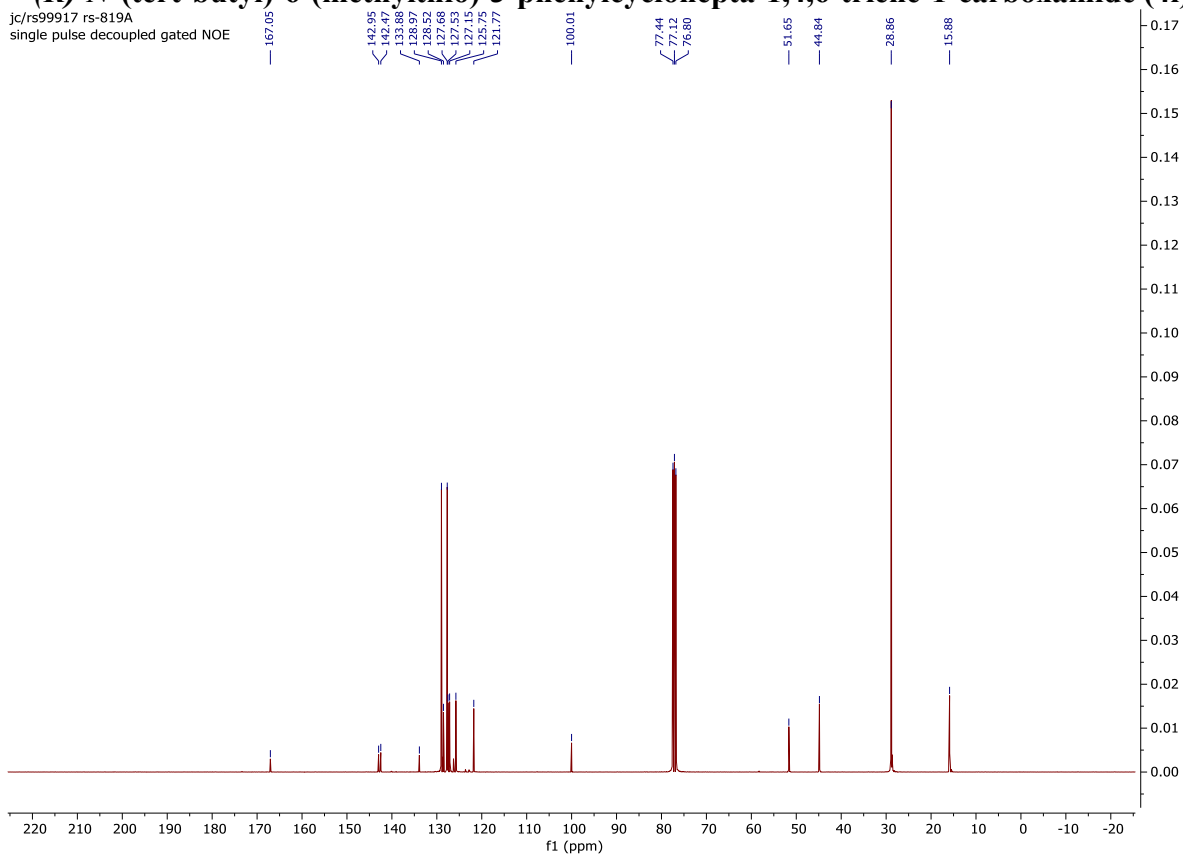

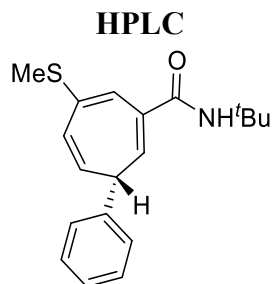

**(*R*)-*N*-(tert-butyl)-6-(methylthio)-3-phenylcyclohepta-1,4,6-triene-1-carboxamide (4l)**

**Analytical HPLC** (IA Column), eluting with hexane- IPA (99:5), showed it to consist of a 1:99 mixture of two enantiomers with retention times 7.68 mins(minor) and 8.982 mins (major), flow rate 1mL/min.

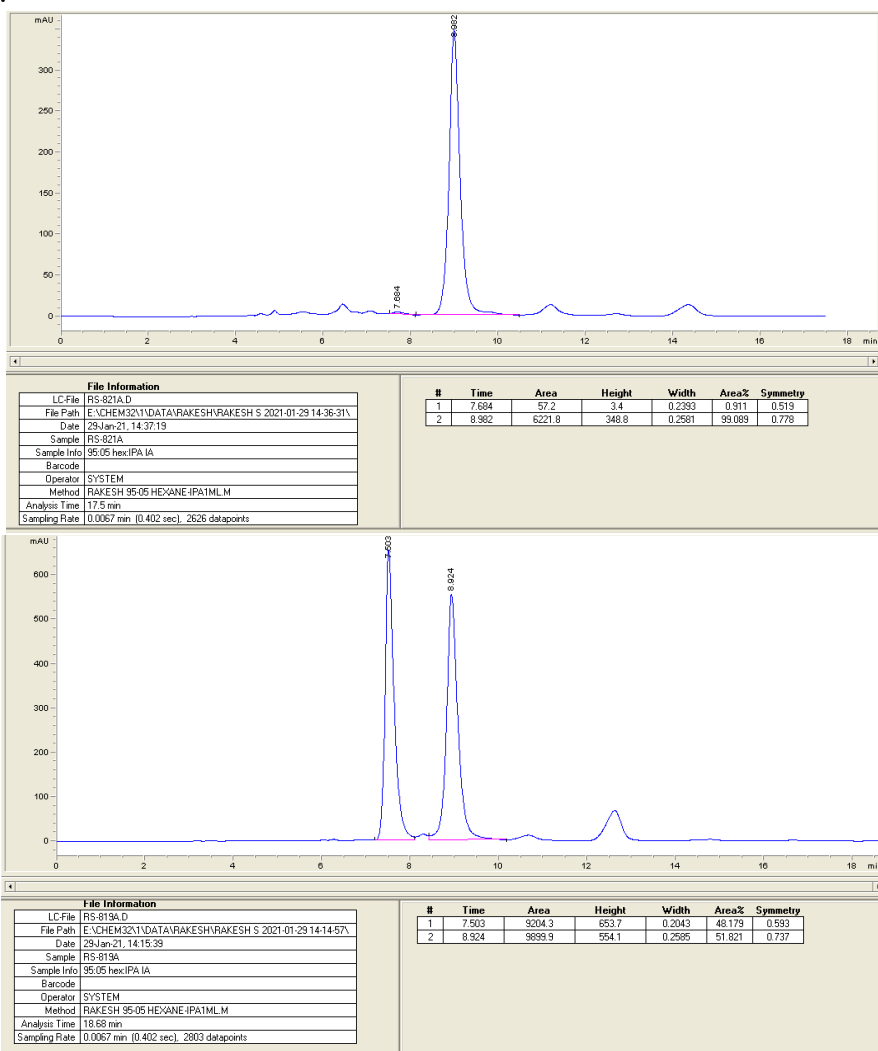

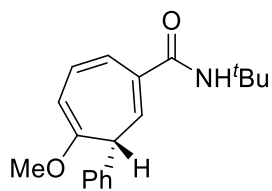

**(R)-N-(tert-butyl)-4-methoxy-3-phenylcyclohepta-1,4,6-triene-1-carboxamide (4m)**

65477 rs-705rept12h.10.fid

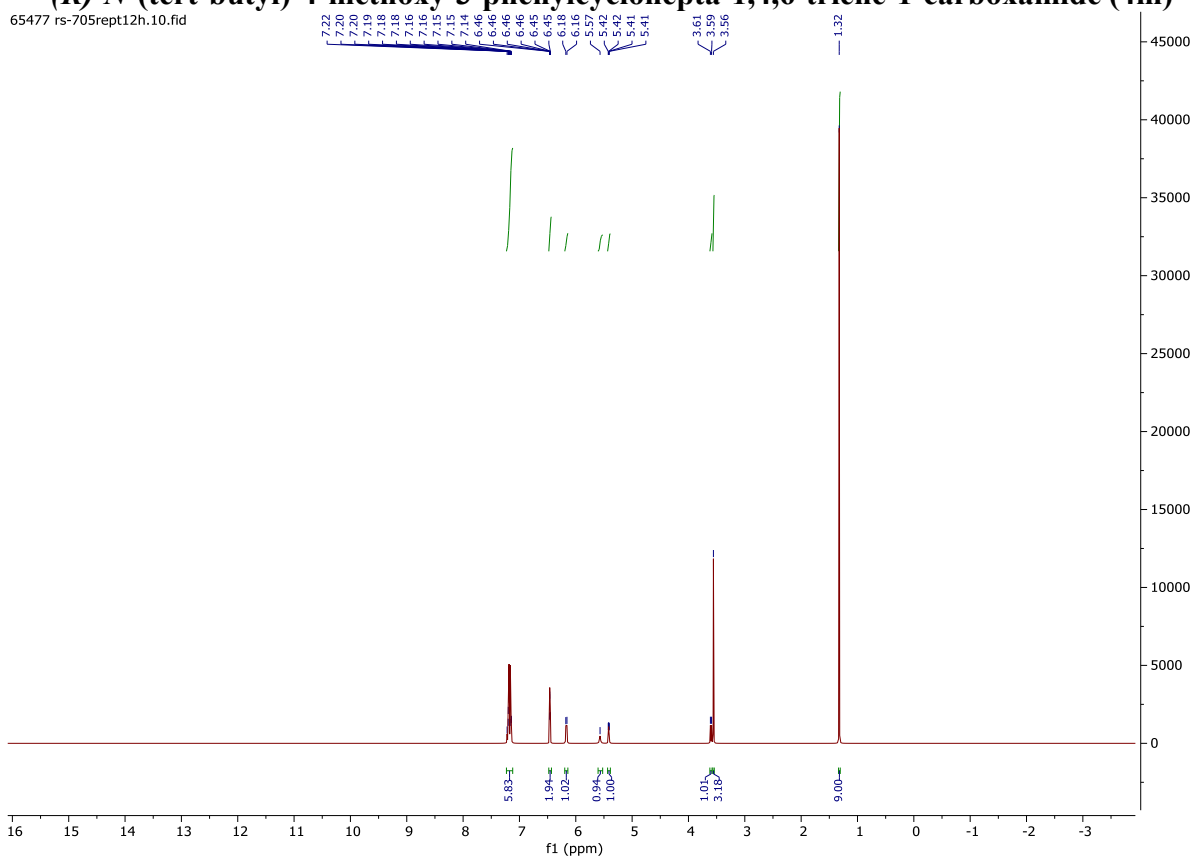



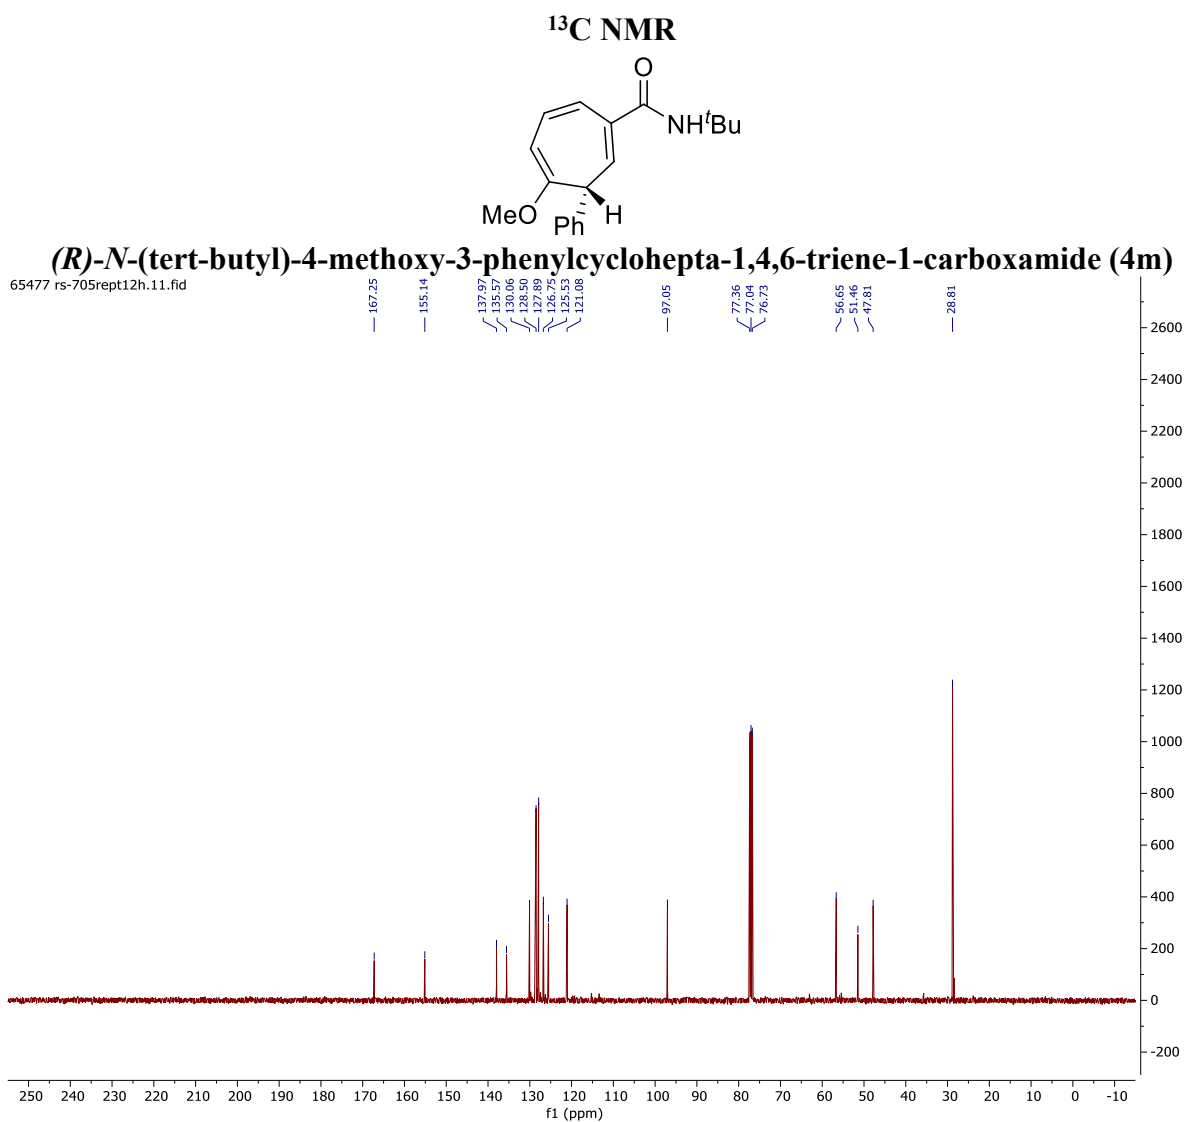

# HPLC

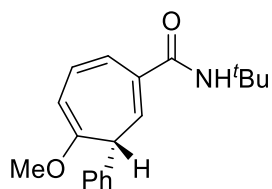

**(R)-N-(tert-butyl)-4-methoxy-3-phenylcyclohepta-1,4,6-triene-1-carboxamide (4m)**  
**Analytical HPLC** (IA Column), eluting with hexane-IPA-(10:90), showed it to consist of a mixture of 39:61 two enantiomers with retention times  $t_R = 6.025$  mins (minor) and 7.58 mins (major) respectively.

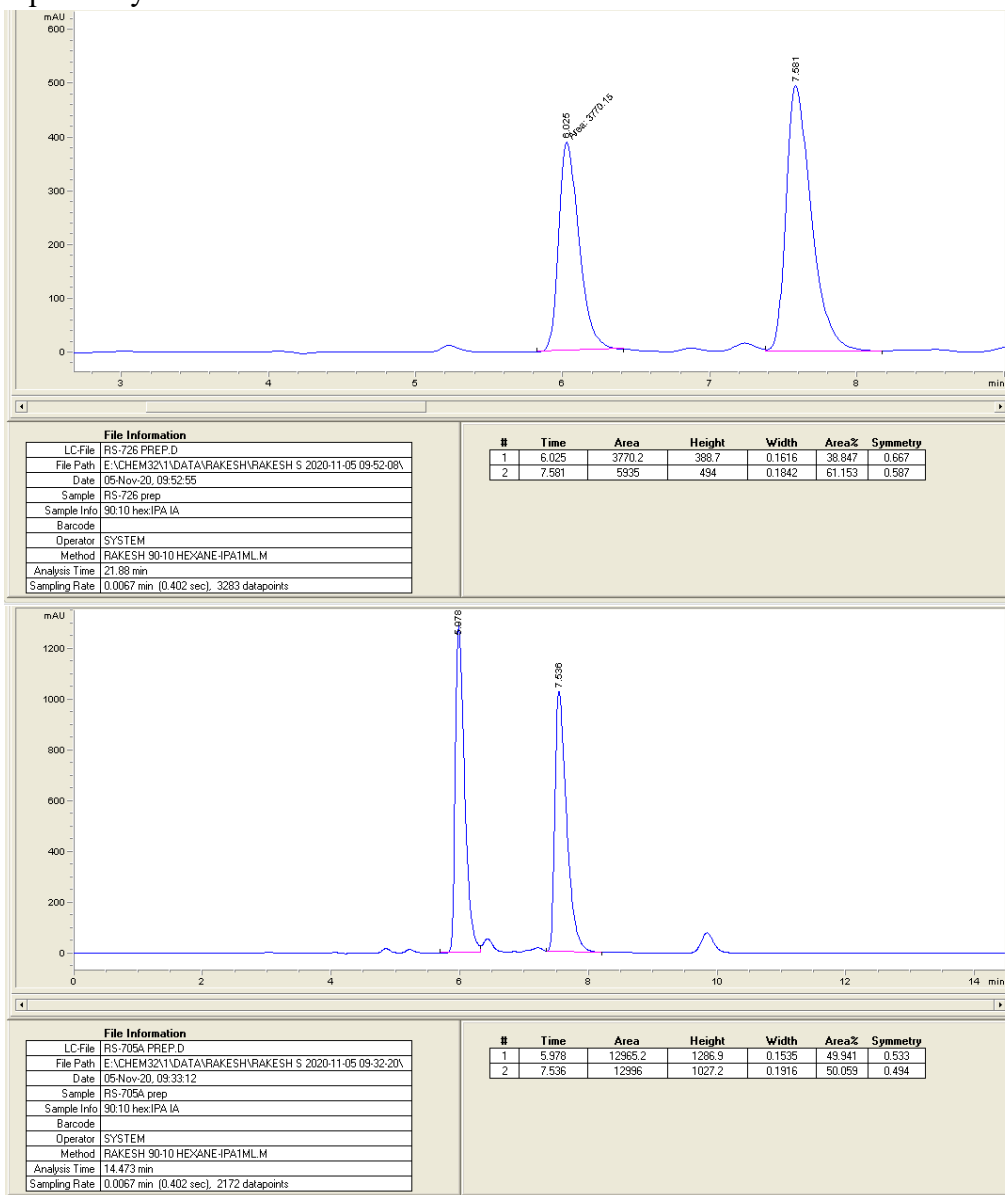

# <sup>1</sup>H NMR

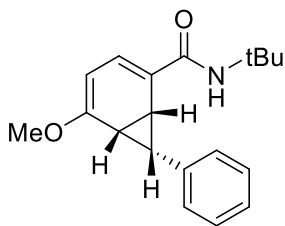

**(1*R*,6*S*,7*S*)-*N*-(tert-butyl)-5-methoxy-7-phenylbicyclo[4.1.0]hepta-2,4-diene-2-carboxamide (5n)**

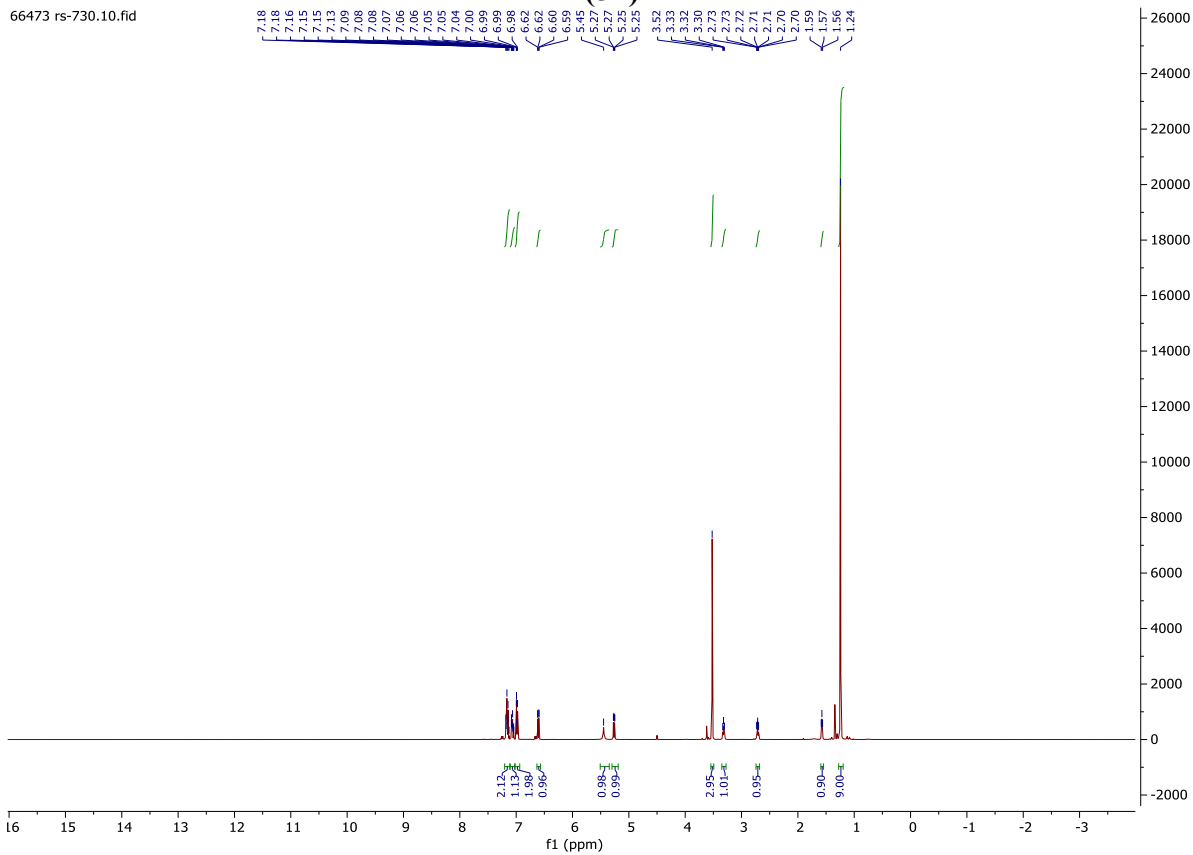

<sup>13</sup>C NMR

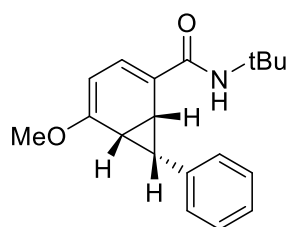

**(1*R*,6*S*,7*S*)-*N*-(tert-butyl)-5-methoxy-7-phenylbicyclo[4.1.0]hepta-2,4-diene-2-carboxamide (5n)**

66473 rs-730.11.fid

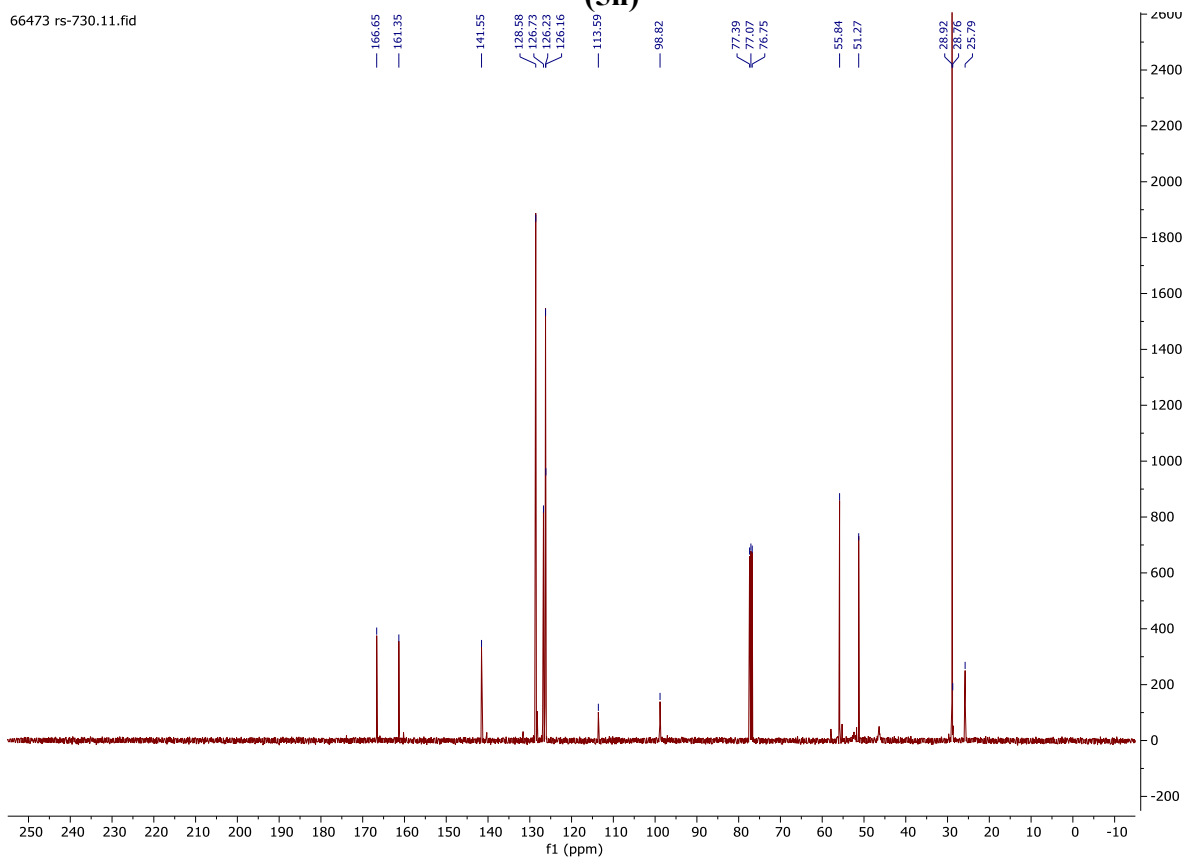

*NOSY*

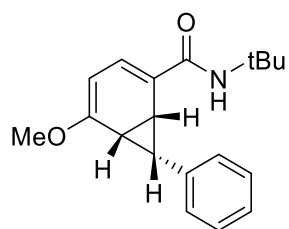

**(1*R*,6*S*,7*S*)-*N*-(tert-butyl)-5-methoxy-7-phenylbicyclo[4.1.0]hepta-2,4-diene-2-carboxamide (5n)**

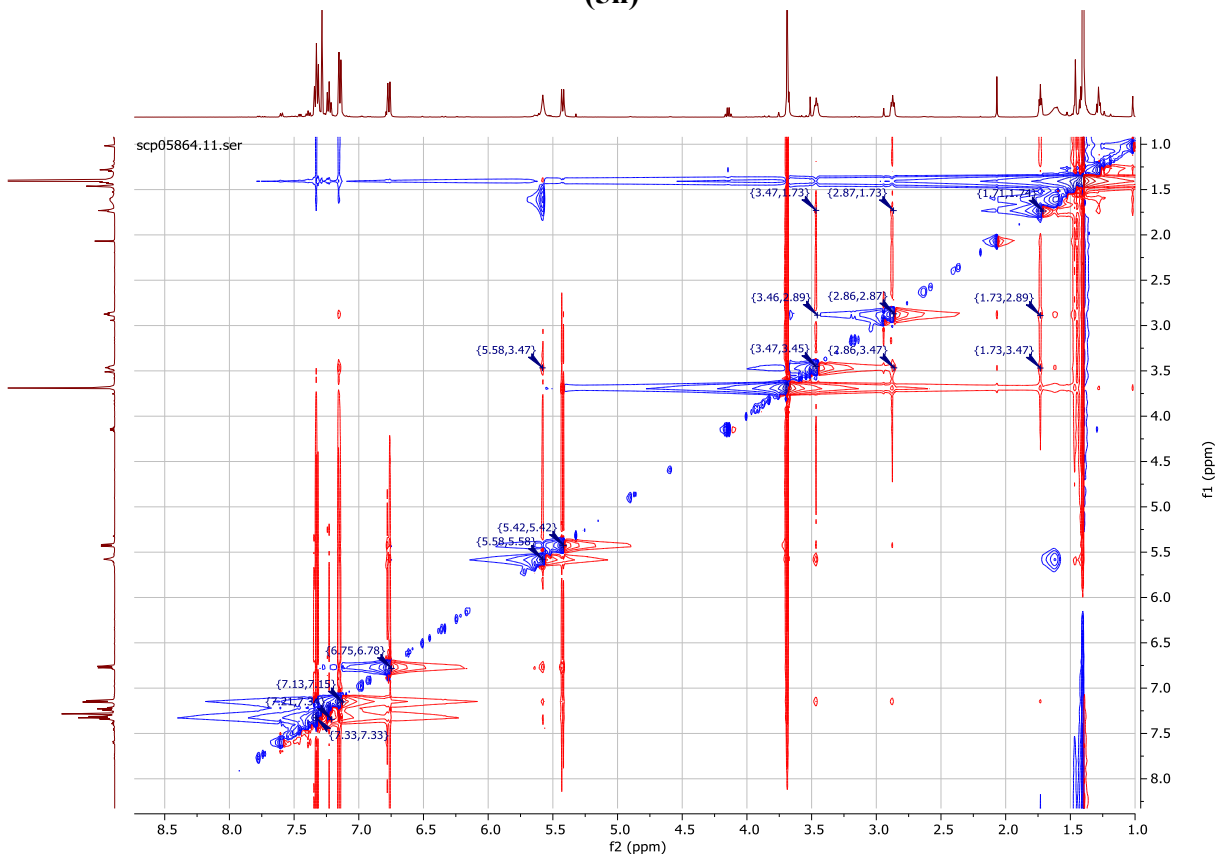

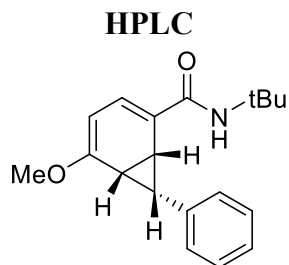

**(1*R*,6*S*,7*S*)-*N*-(tert-butyl)-5-methoxy-7-phenylbicyclo[4.1.0]hepta-2,4-diene-2-carboxamide  
5n)**

**Analytical HPLC** (IA Column), eluting with hexane-IPA (95:5), showed it to consist of a 6:94 mixture of two enantiomers with retention times 18.05 mins (minor) and 23.82 mins (major) respectively.

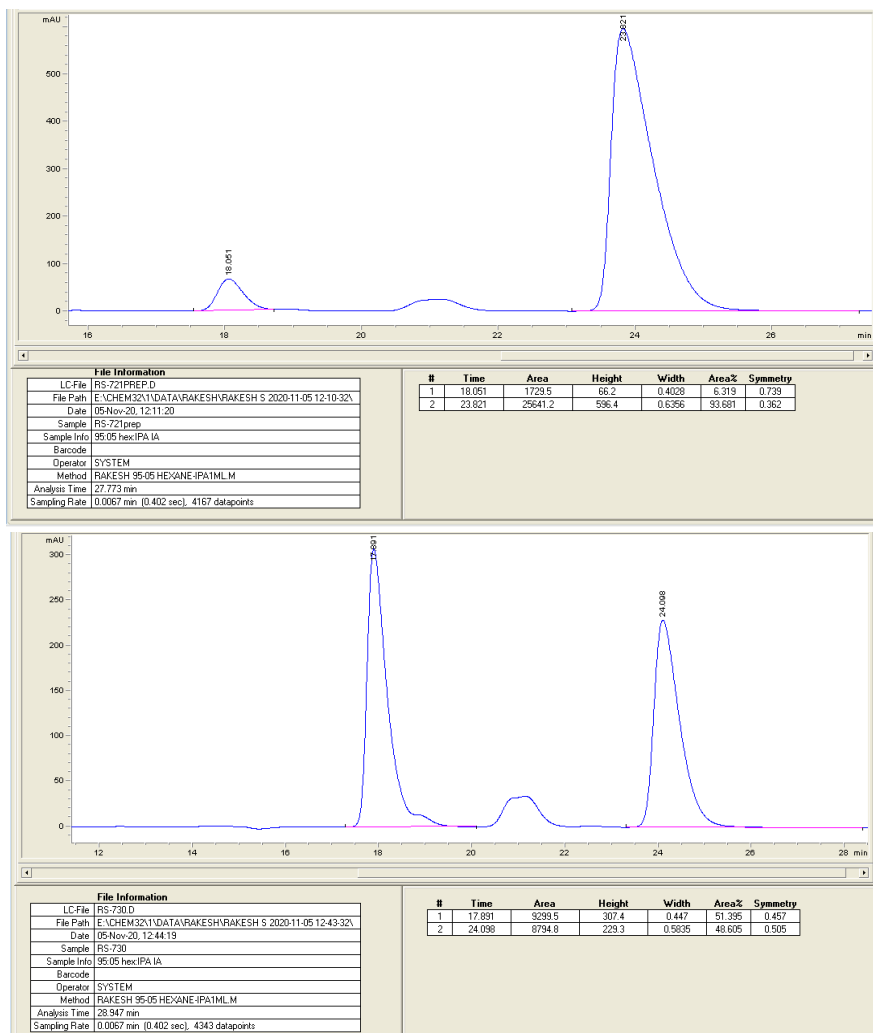

**<sup>1</sup>H NMR**

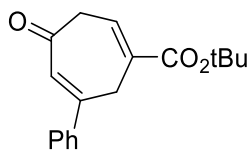

**tert-butyl 4-oxo-6-phenylcyclohepta-1,5-diene-1-carboxylate (6n)**

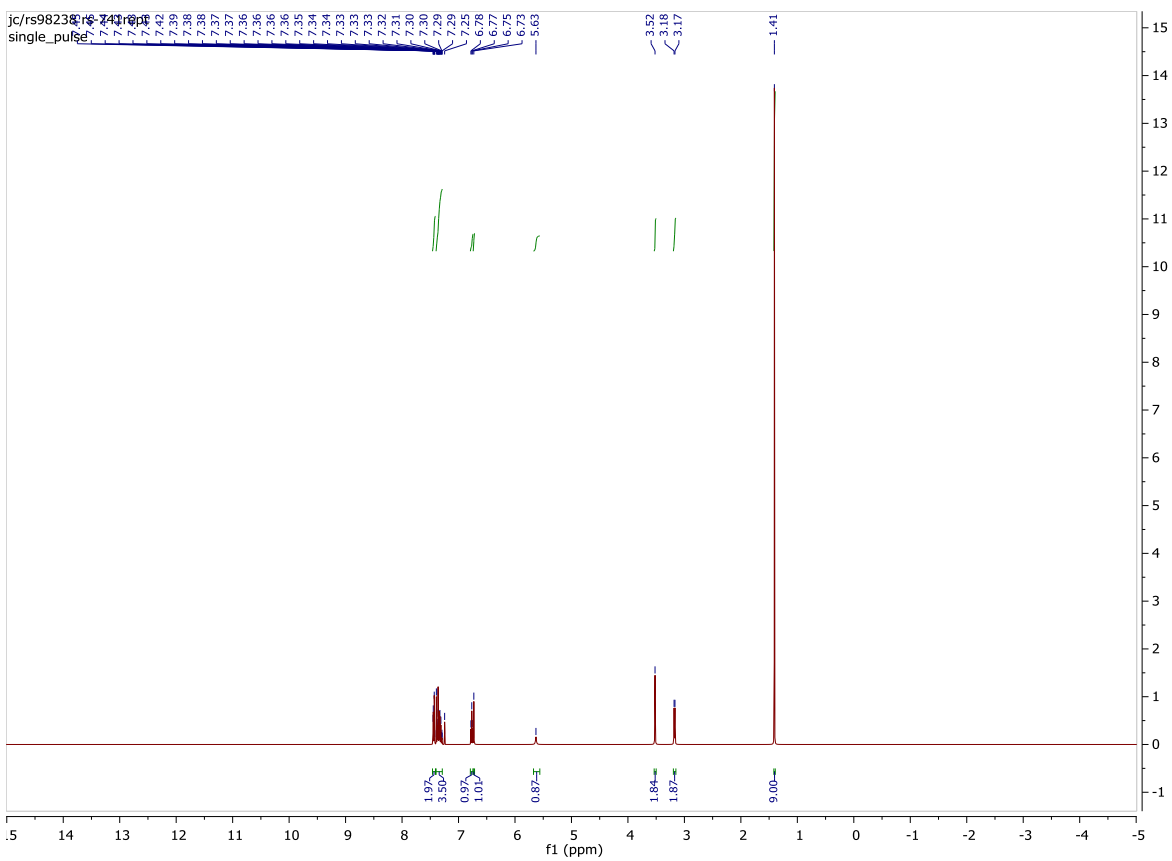

<sup>13</sup>C NMR

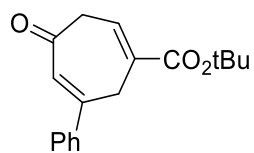

**tert-butyl 4-oxo-6-phenylcyclohepta-1,5-diene-1-carboxylate (6n)**

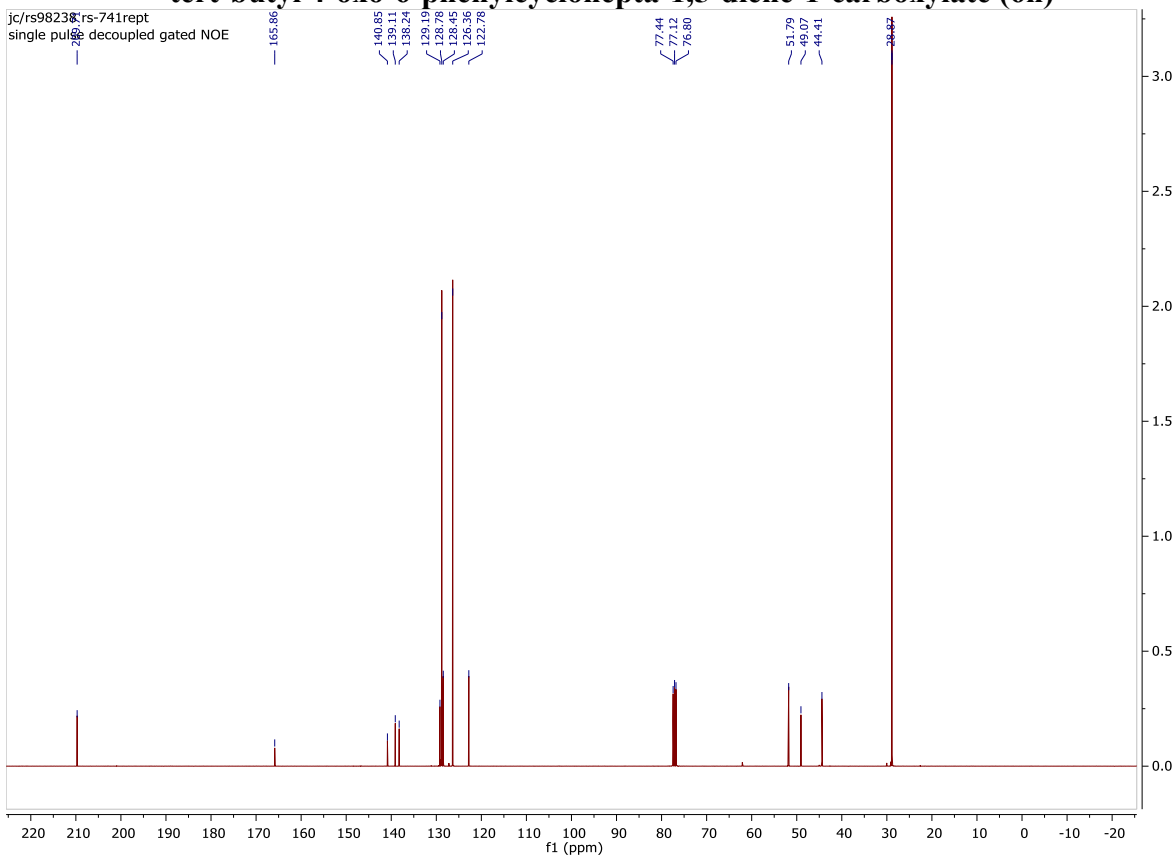



<sup>1</sup>H NMR

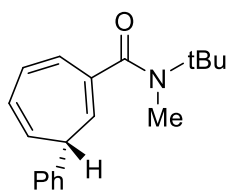

**(R)-N-(tert-butyl)-N-methyl-3-phenylcyclohepta-1,4,6-triene-1-carboxamide (8)**

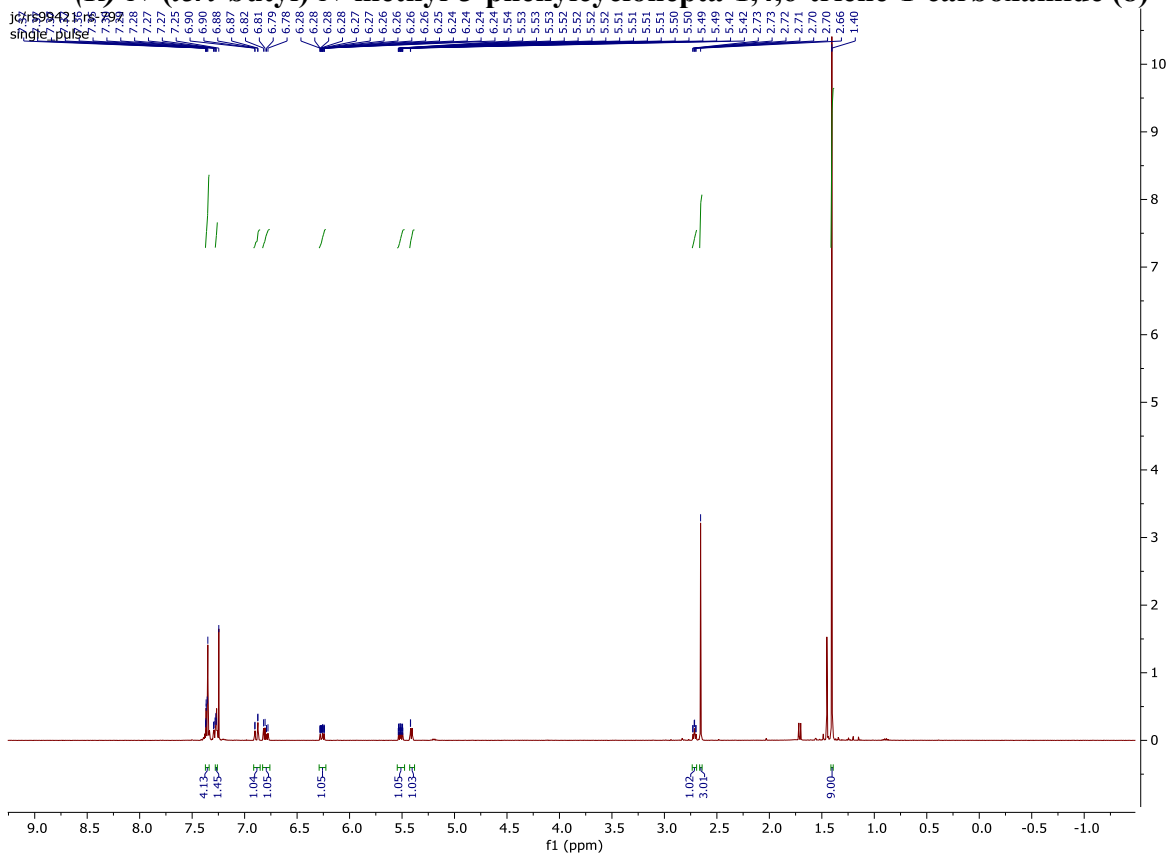

<sup>13</sup>C NMR



**(R)-N-(tert-butyl)-N-methyl-3-phenylcyclohepta-1,4,6-triene-1-carboxamide (8)**

jc/rs99421 rs-797

single pulse decoupled gated NOE

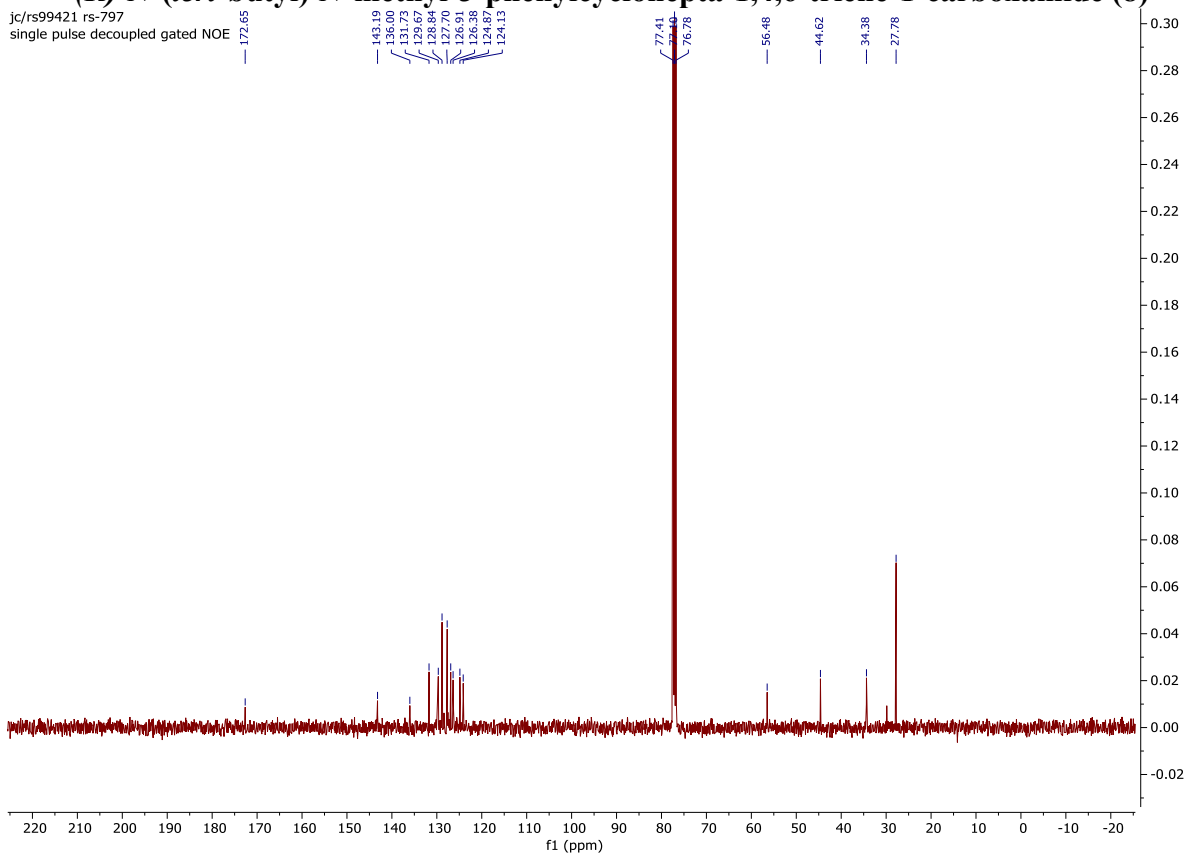

# HPLC

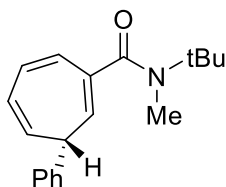

**(R)-N-(tert-butyl)-N-methyl-3-phenylcyclohepta-1,4,6-triene-1-carboxamide (8)**

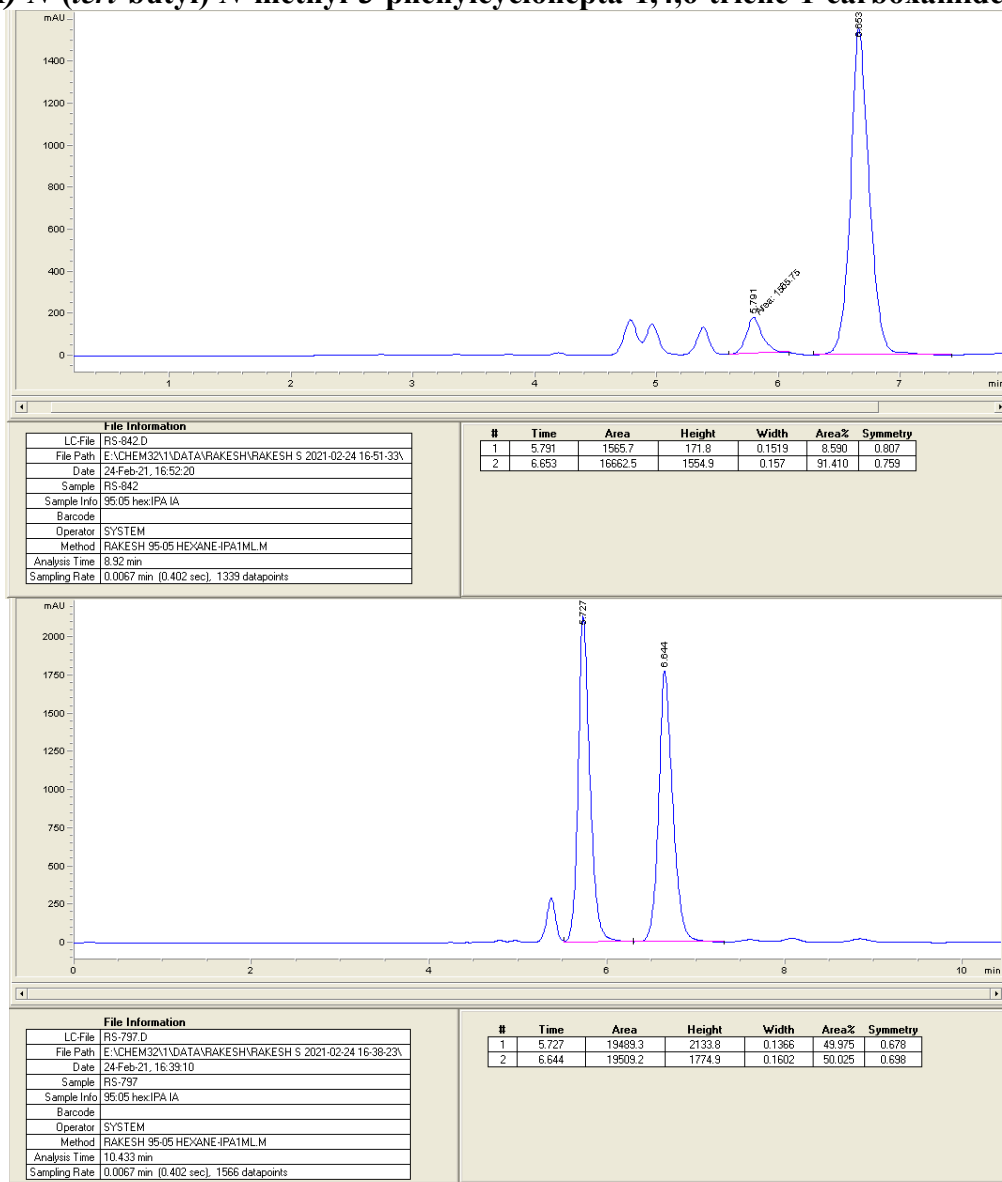

CC(C)(C)N(C)C(=O)C1Cc2ccccc2C1[illegible]

**<sup>13</sup>C NMR**

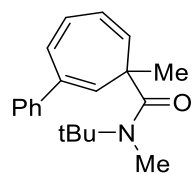

***N*-(tert-butyl)-N,1-dimethyl-3-phenylcyclohepta-2,4,6-triene-1-carboxamide (9)**

jc/rs1048 rs-823  
single pulse decoupled gated NOE

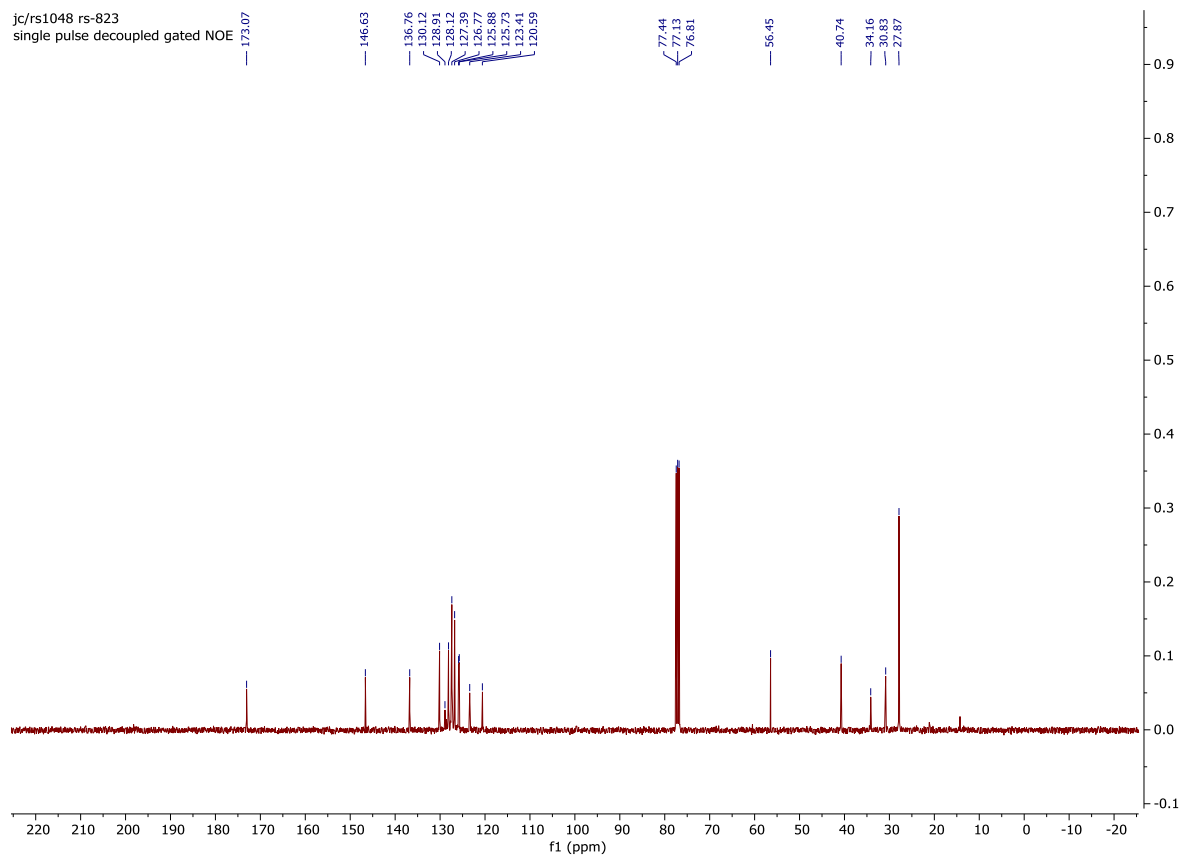

<sup>1</sup>H NMR

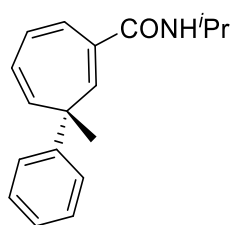

**(R)-N-isopropyl-3-methyl-3-phenylcyclohepta-1,4,6-triene-1-carboxamide (11a)**

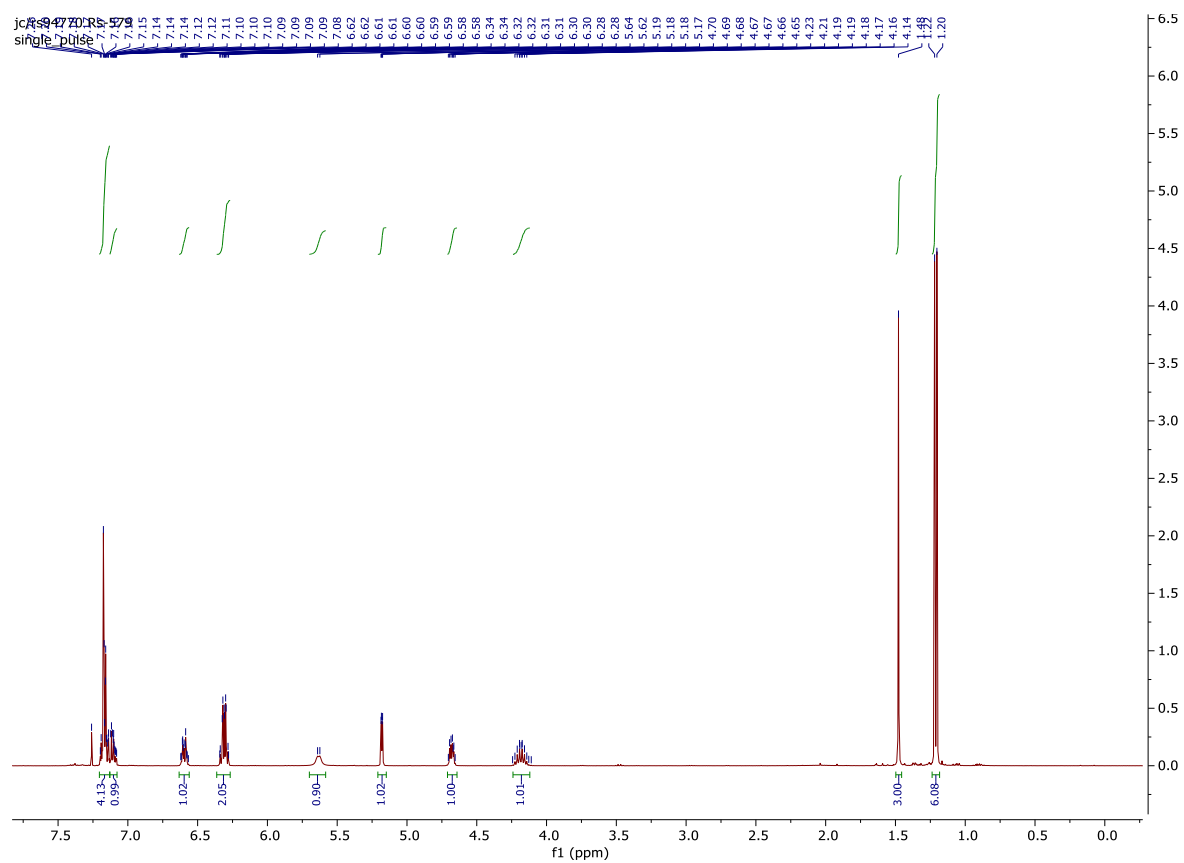

**$^{13}\text{C}$  NMR**



***(R)*-N-isopropyl-3-methyl-3-phenylcyclohepta-1,4,6-triene-1-carboxamide (11a)**

jc/rs94770 Rs-579  
single pulse decoupled gated NOE

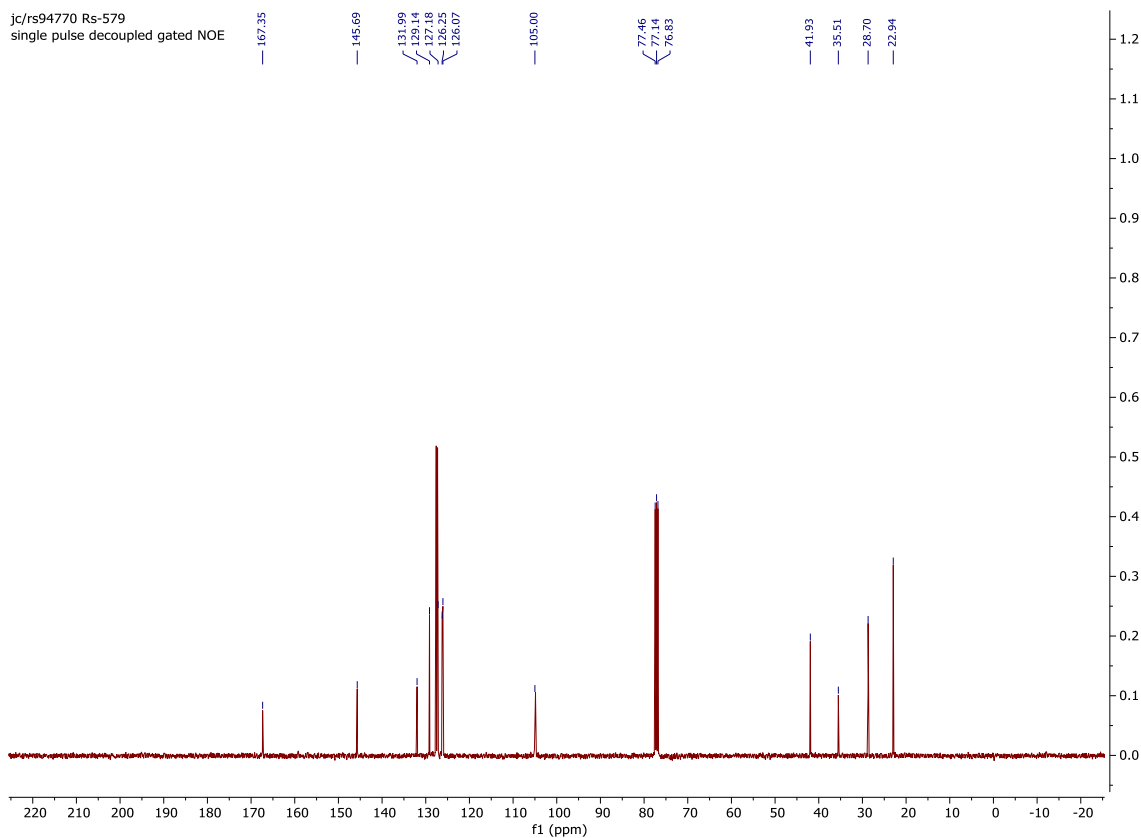

# HPLC

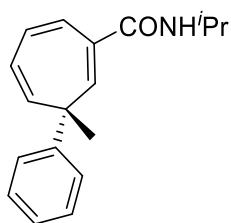

**(R)-N-isopropyl-3-methyl-3-phenylcyclohepta-1,4,6-triene-1-carboxamide (11a)**  
**Analytical HPLC** (Chiral Regis Whelk O1), eluting with hexane-IPA (80:20), showed it to consist of a 0.42:99.57 mixture of two enantiomers with retention times 15.472 mins(minor) and 20.112 mins (major), respectively.

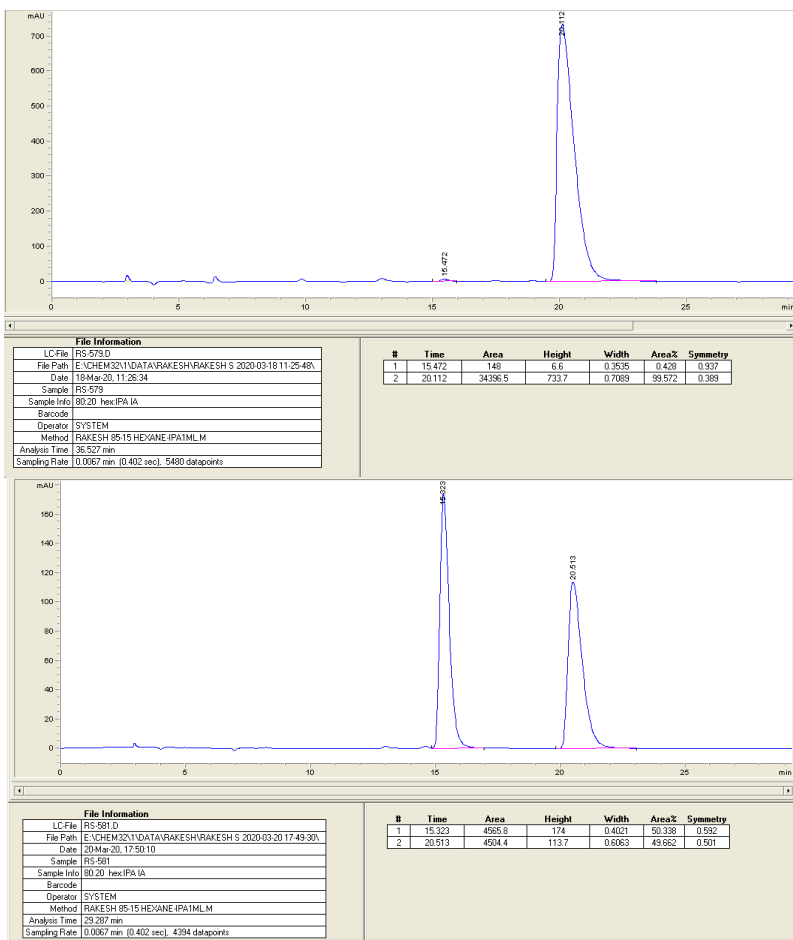



## <sup>1</sup>H NMR

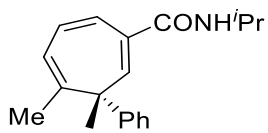

**(S)-N-isopropyl-3,4-dimethyl-3-phenylcyclohepta-1,4,6-triene-1-carboxamide (11b)**

65034 rs-682rept.10.fid

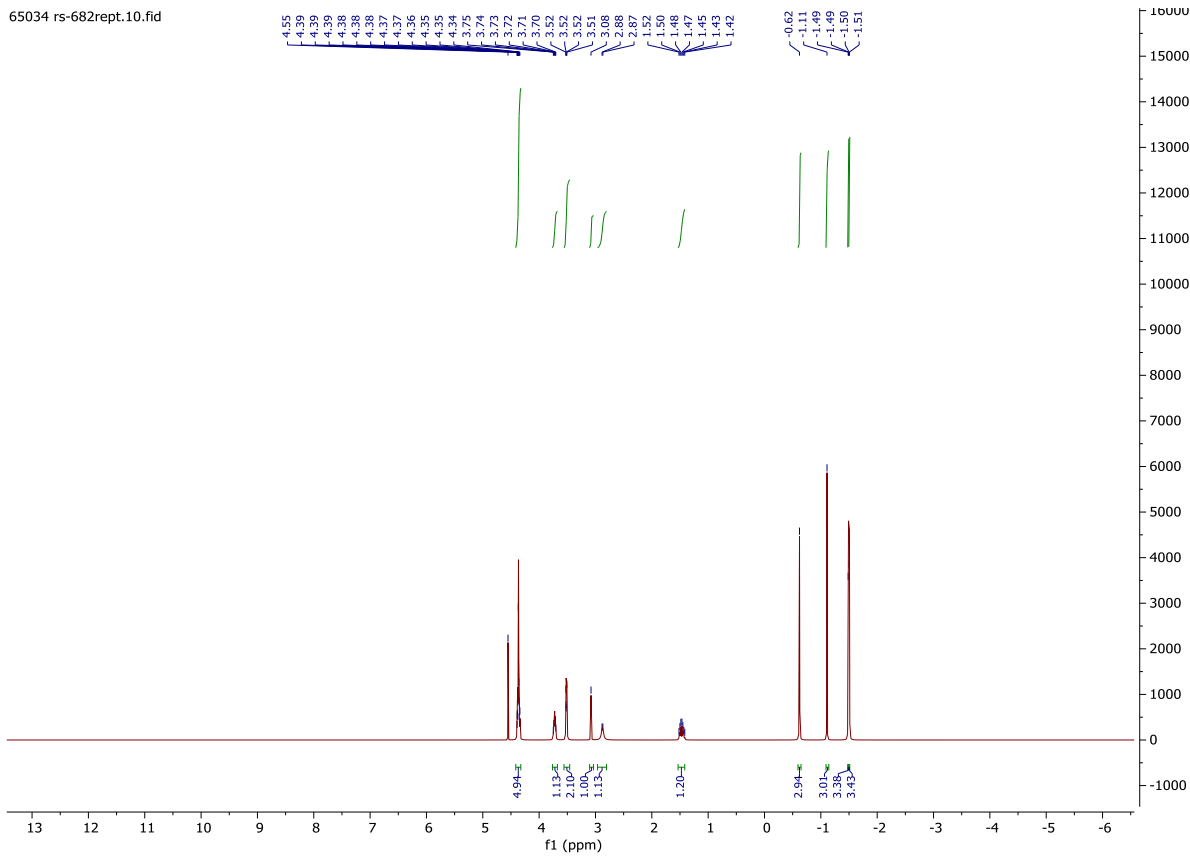

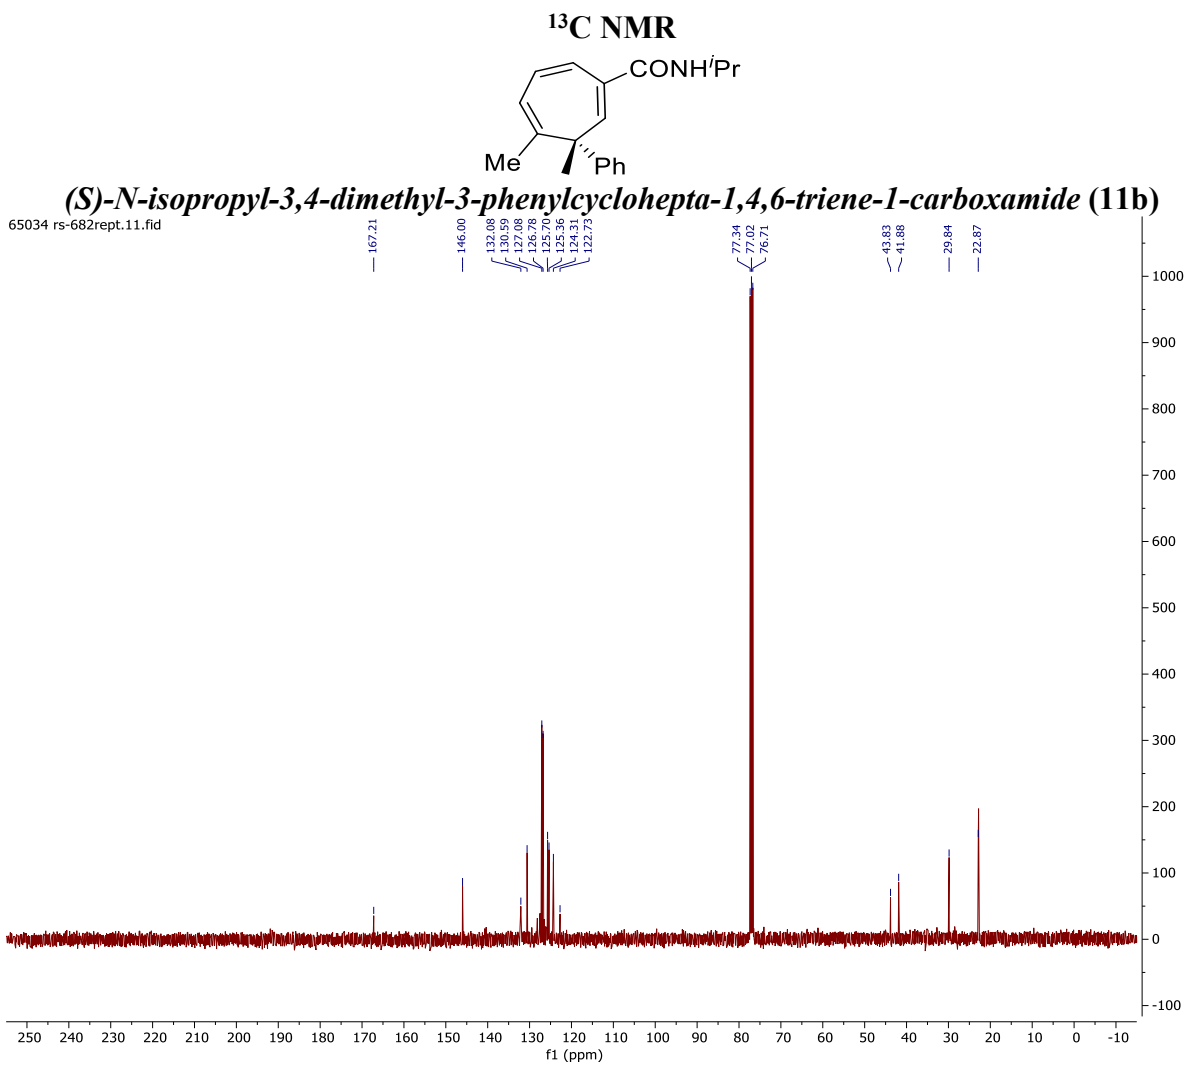

## HPLC

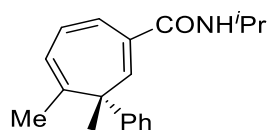

**(S)-N-isopropyl-3,4-dimethyl-3-phenylcyclohepta-1,4,6-triene-1-carboxamide (11b)**  
**Analytical HPLC** (Chiral Regis Whelk O1), eluting with hexane-IPA (85:15), showed it to consist of a 2:98 mixture of two enantiomers with retention times 25.838 mins(minor) and 28.485 mins (major), respectively.

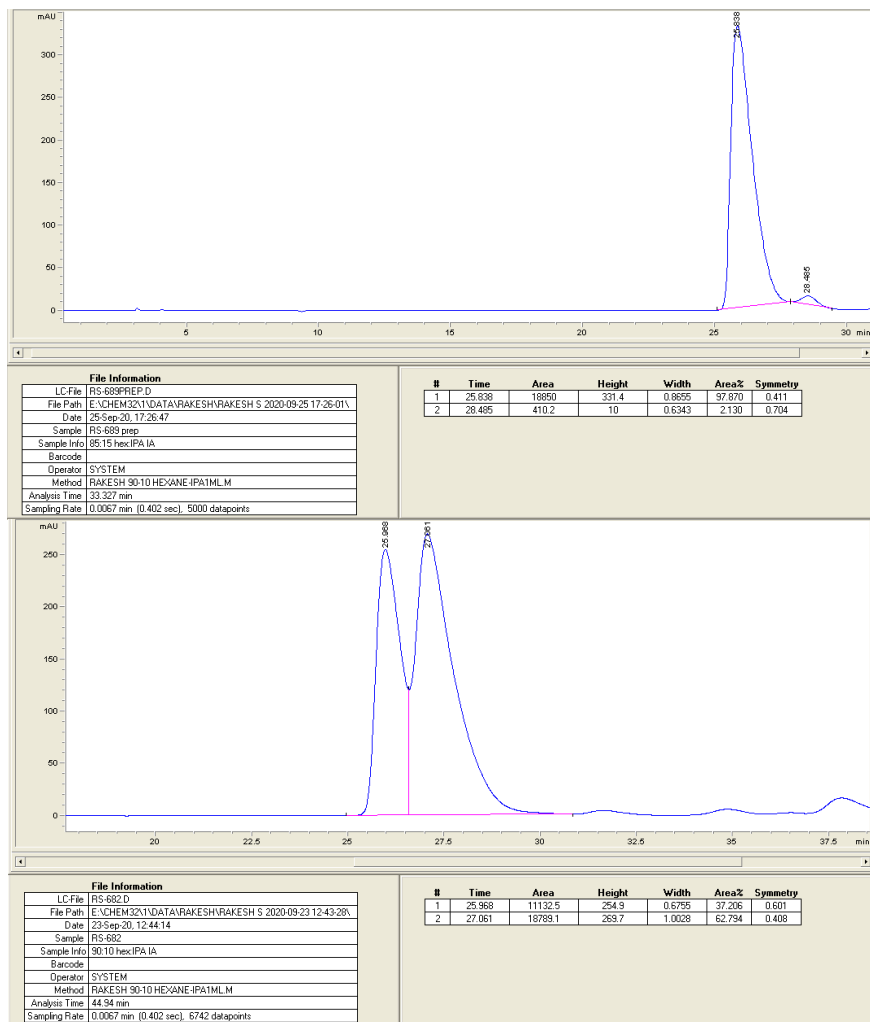

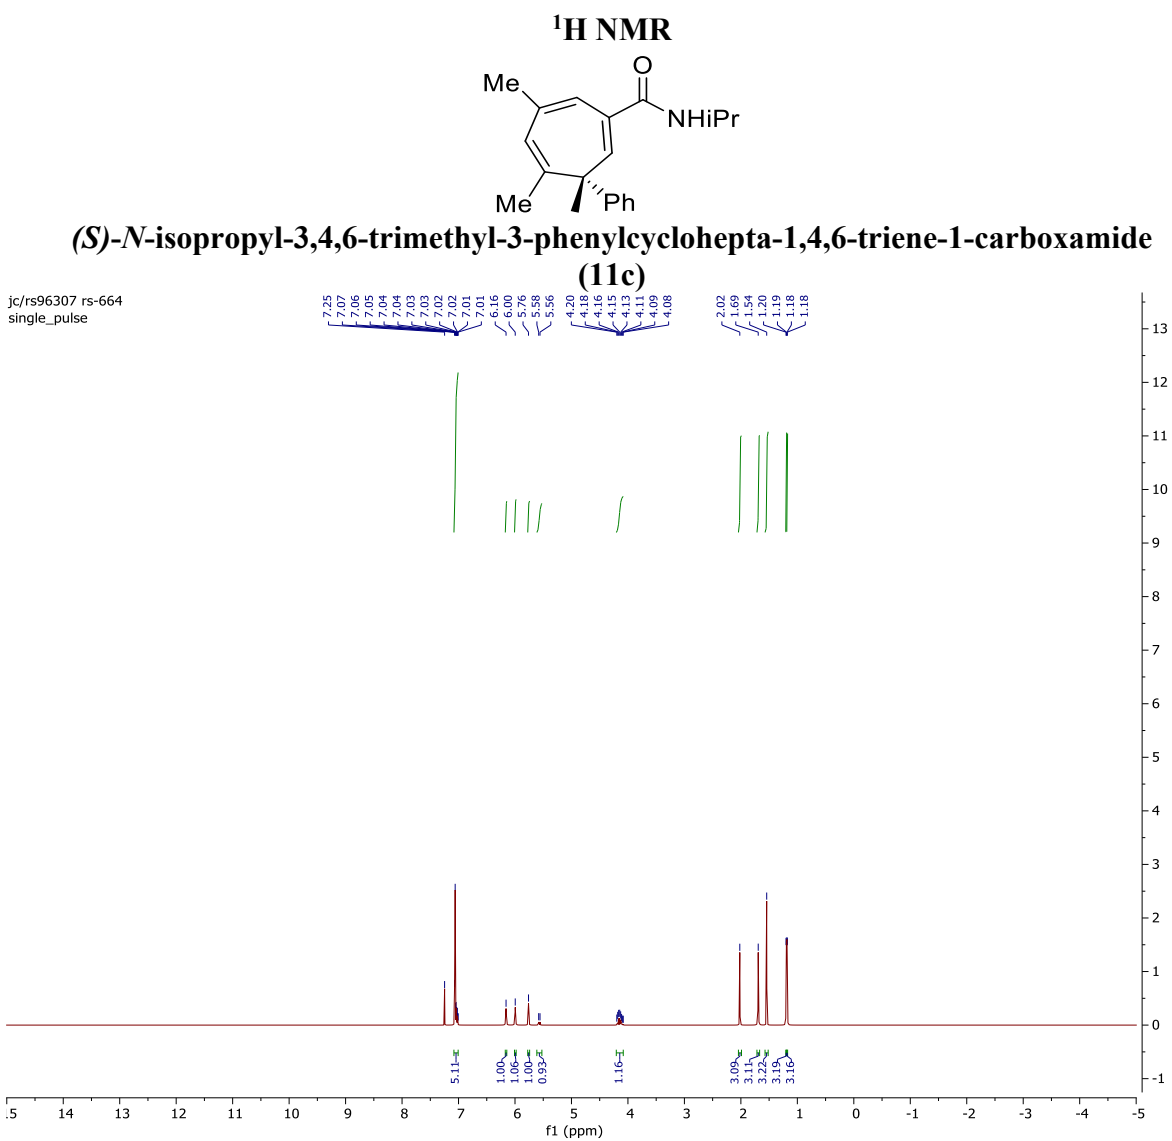

<sup>13</sup>C NMR

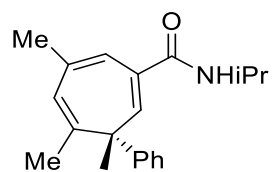

**(S)-N-isopropyl-3,4,6-trimethyl-3-phenylcyclohepta-1,4,6-triene-1-carboxamide (11c)**

jc/rs96307 rs-664  
single pulse decoupled gated NOE

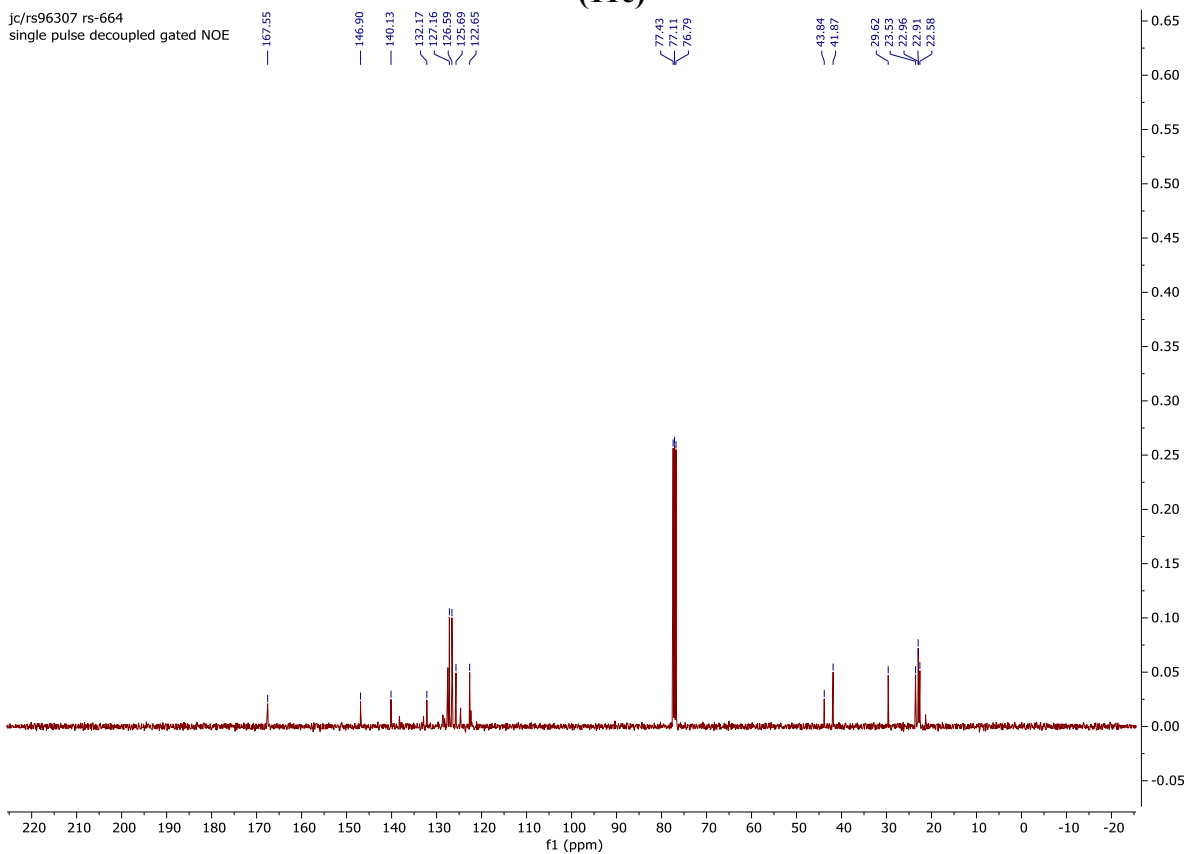

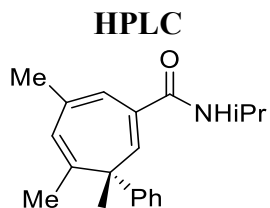

**(*S*)-*N*-isopropyl-3,4,6-trimethyl-3-phenylcyclohepta-1,4,6-triene-1-carboxamide  
(11c)**

**Analytical HPLC** (Chiral Regis Whelk O1), eluting with hexane-IPA (85:15), showed it to consist of a 90:10 mixture of two enantiomers with retention times 14.816 mins(major) and 16.019 mins (minor), respectively.

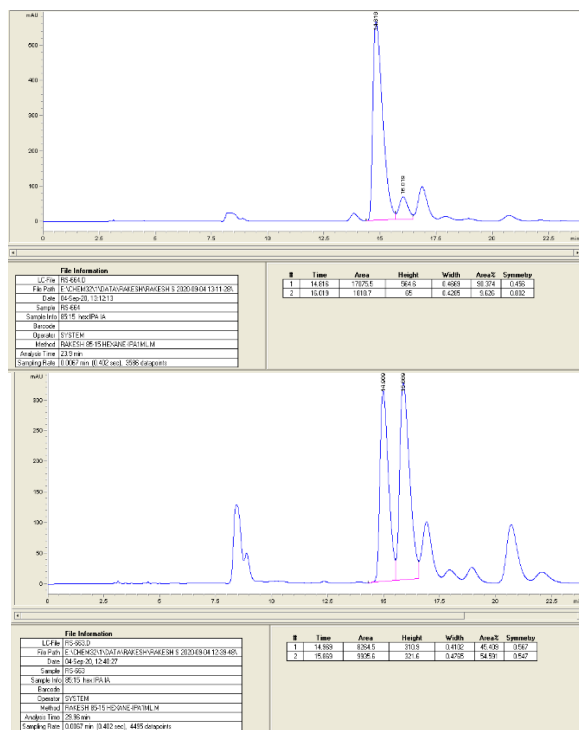

CCNC(=O)C1=CC=C(C=C1)C(=C)C(OC)C2=CC=CC=C2

<sup>13</sup>C NMR

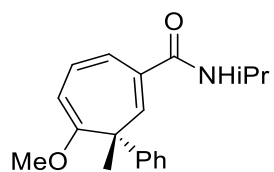

**(R)-N-isopropyl-4-methoxy-3-methyl-3-phenylcyclohepta-1,4,6-triene-1-carboxamide (11d)**

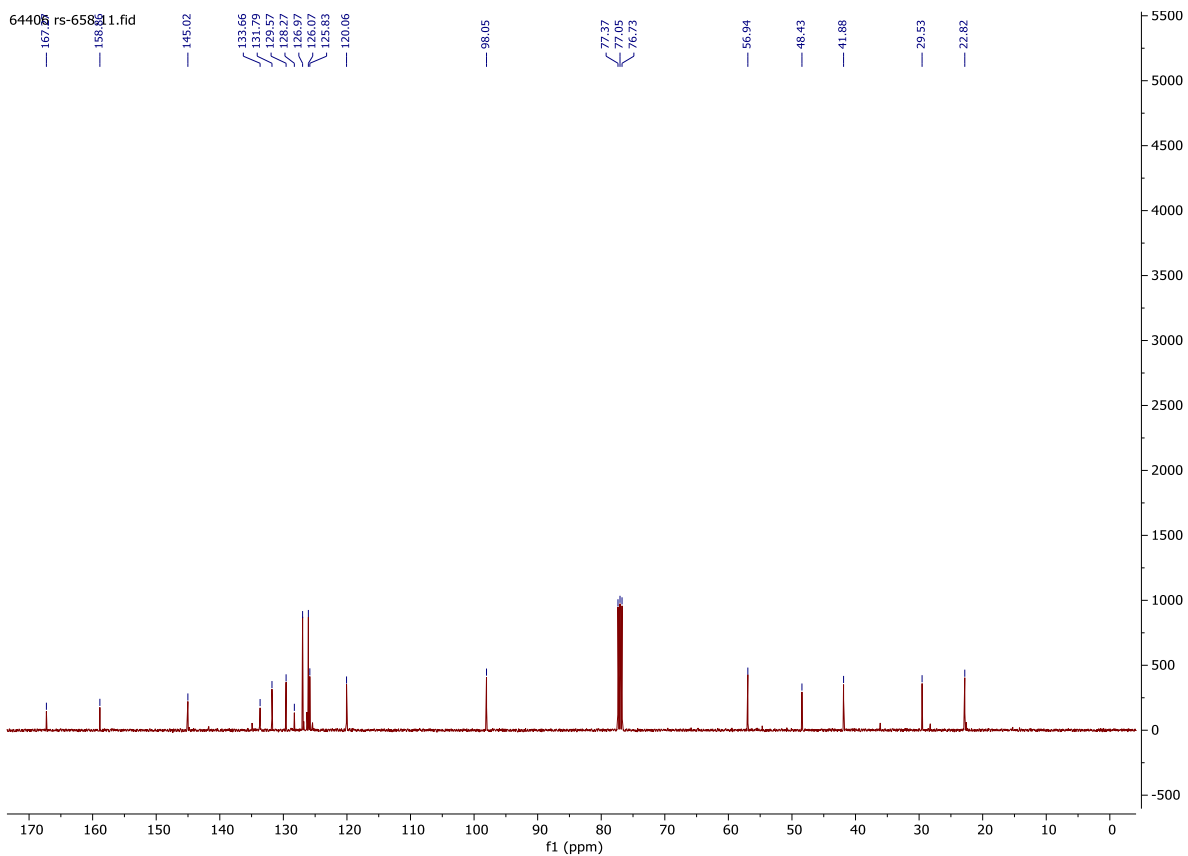



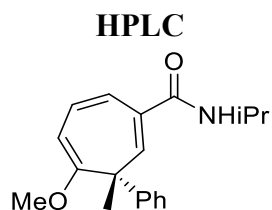

**(*R*)-*N*-isopropyl-4-methoxy-3-methyl-3-phenylcyclohepta-1,4,6-triene-1-carboxamide (11d)**  
**Analytical HPLC** (Chiral Regis Whelk O1), eluting with hexane-IPA (85:15), showed it to consist of a 100:00 mixture of one enantiomer with retention times 17.575 mins.

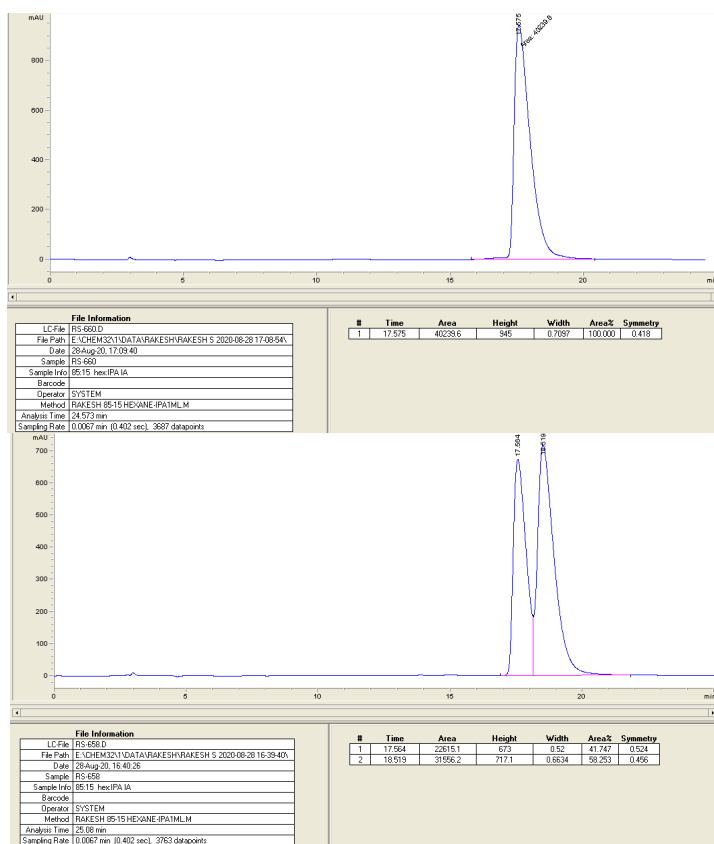

<sup>1</sup>H NMR

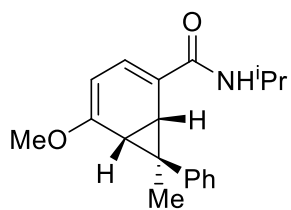

**(1*S*,6*R*,7*R*)-*N*-isopropyl-5-methoxy-7-methyl-7-phenylbicyclo[4.1.0]hepta-2,4-diene-2-carboxamide (12e)**

64186 rs-653.10.fid

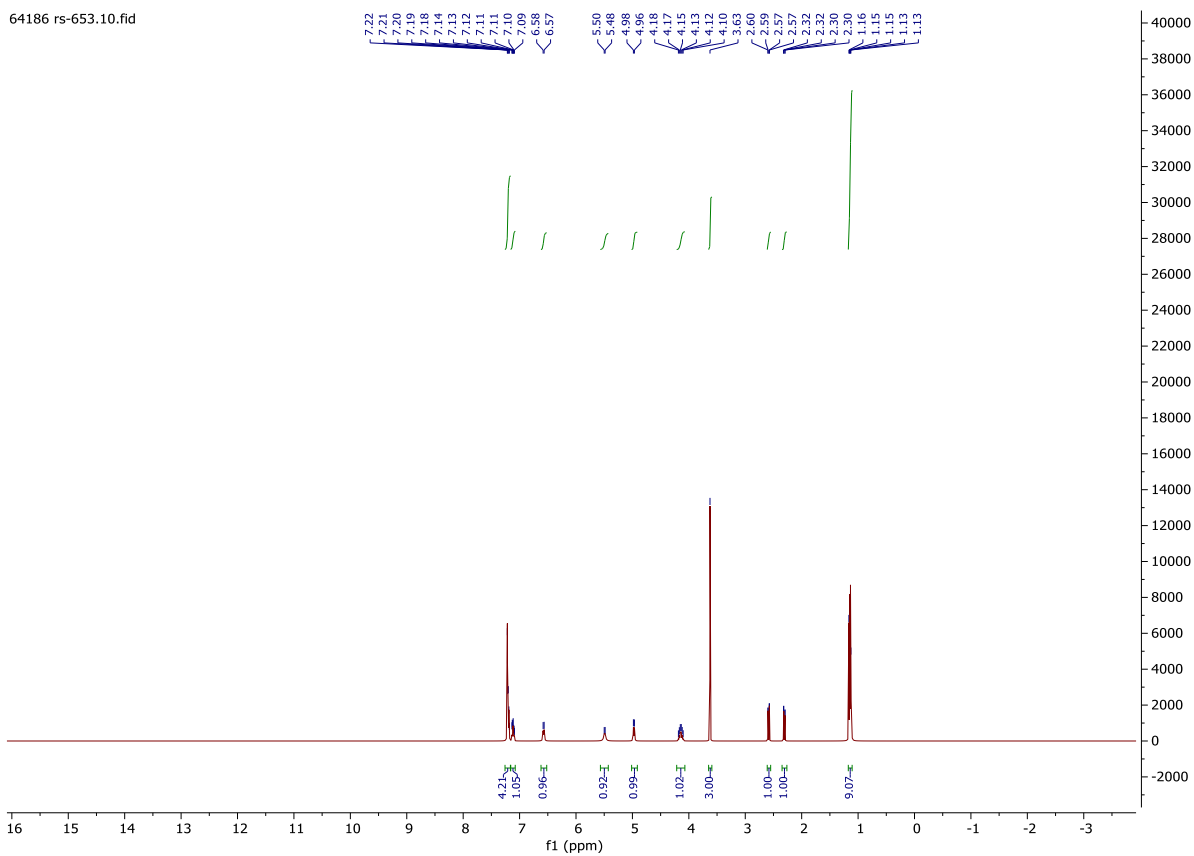

<sup>13</sup>C NMR



**(1*S*,6*R*,7*R*)-*N*-isopropyl-5-methoxy-7-methyl-7-phenylbicyclo[4.1.0]hepta-2,4-diene-2-carboxamide (12e)**

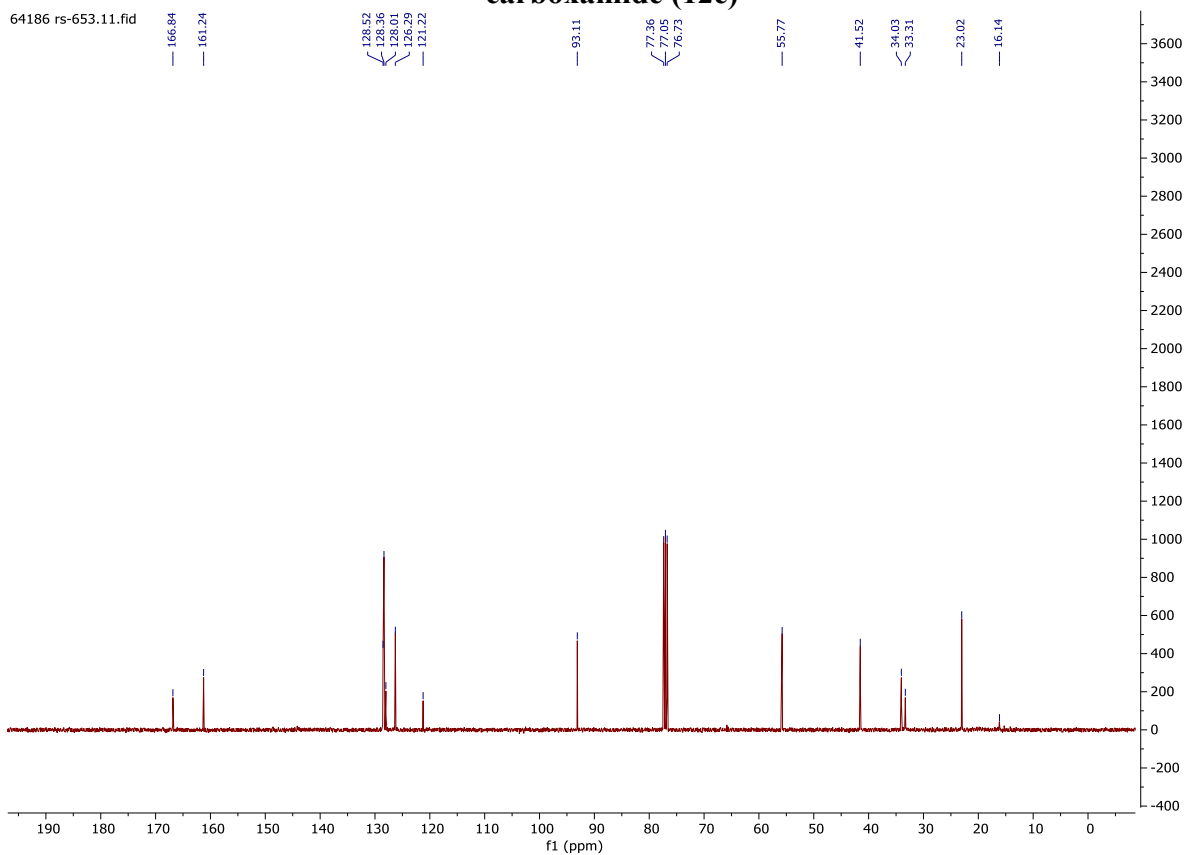

NOSY

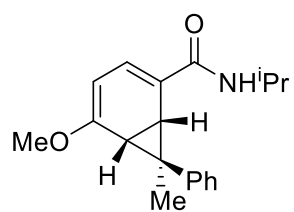

**(1*S*,6*R*,7*R*)-*N*-isopropyl-5-methoxy-7-methyl-7-phenylbicyclo[4.1.0]hepta-2,4-diene-2-carboxamide (12e)**

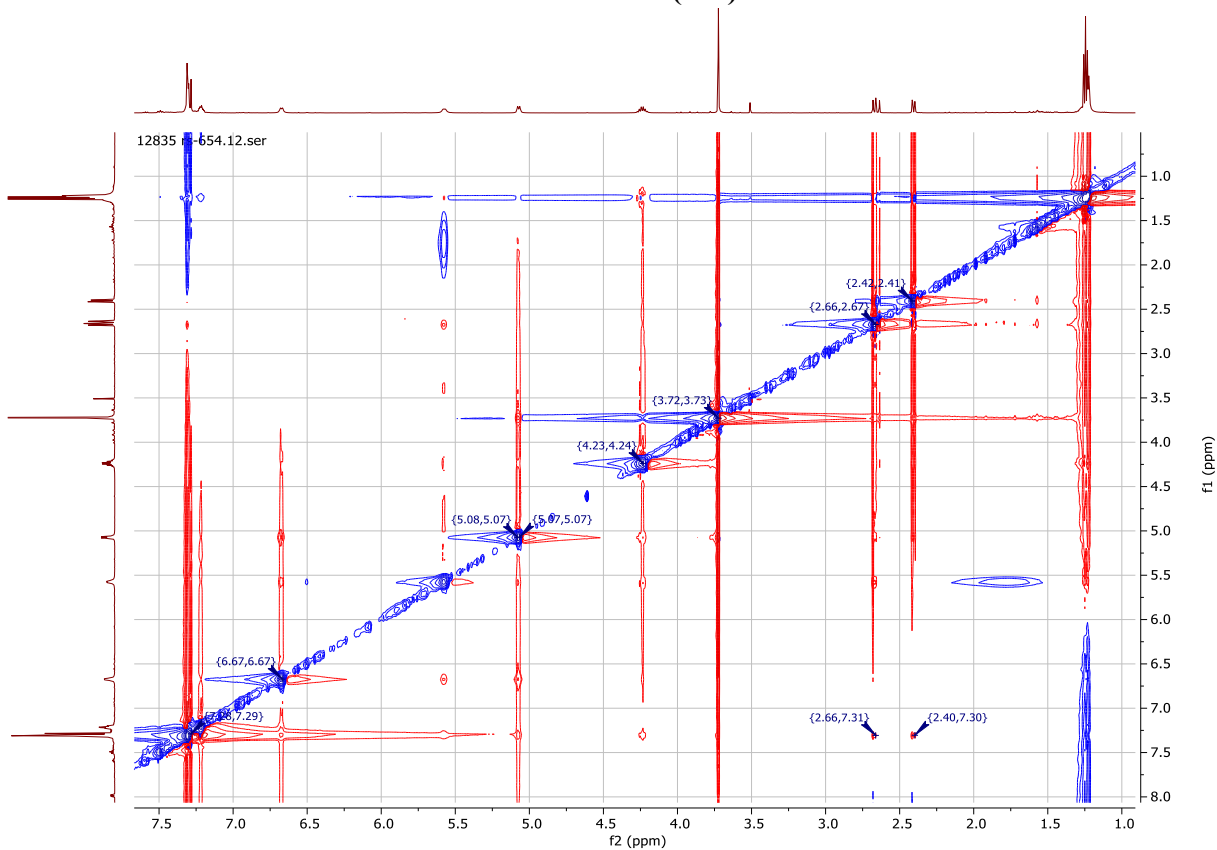

## HPLC

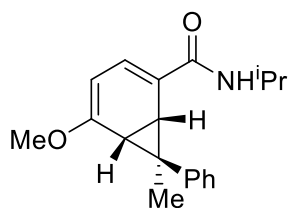

### (1*S*,6*R*,7*R*)-*N*-isopropyl-5-methoxy-7-methyl-7-phenylbicyclo[4.1.0]hepta-2,4-diene-2-carboxamide (12e)

Analytical HPLC (Chiral Regis Whelk O1), eluting with hexane-IPA (70:30), showed it to consist of a 2:98 mixture of two enantiomers with retention times 14.253 mins (minor) and 22.635 mins (major), respectively.

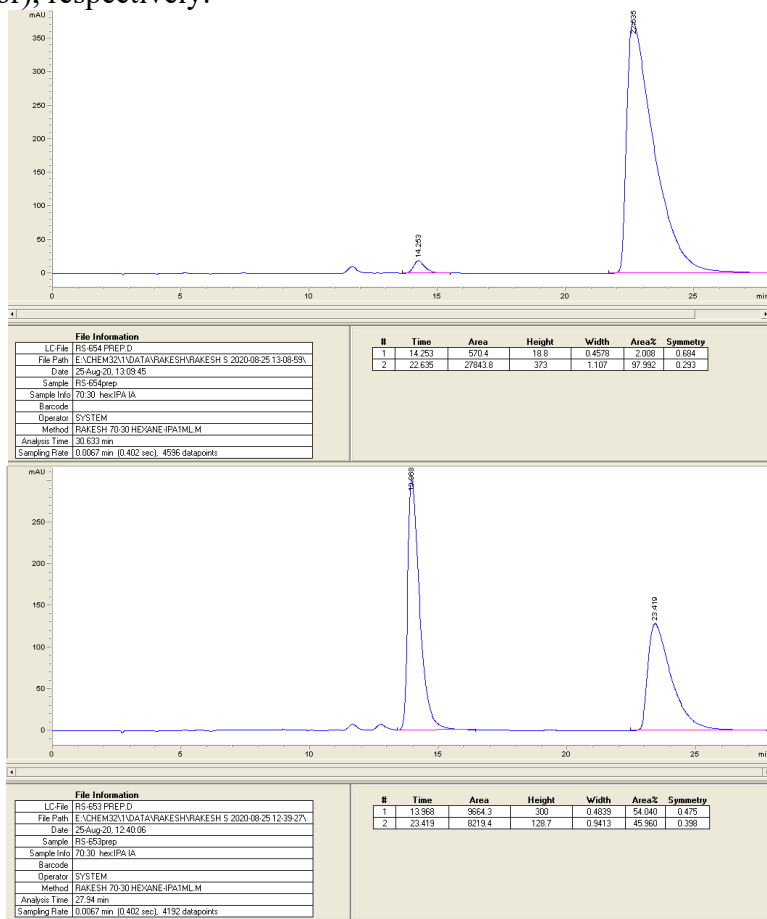

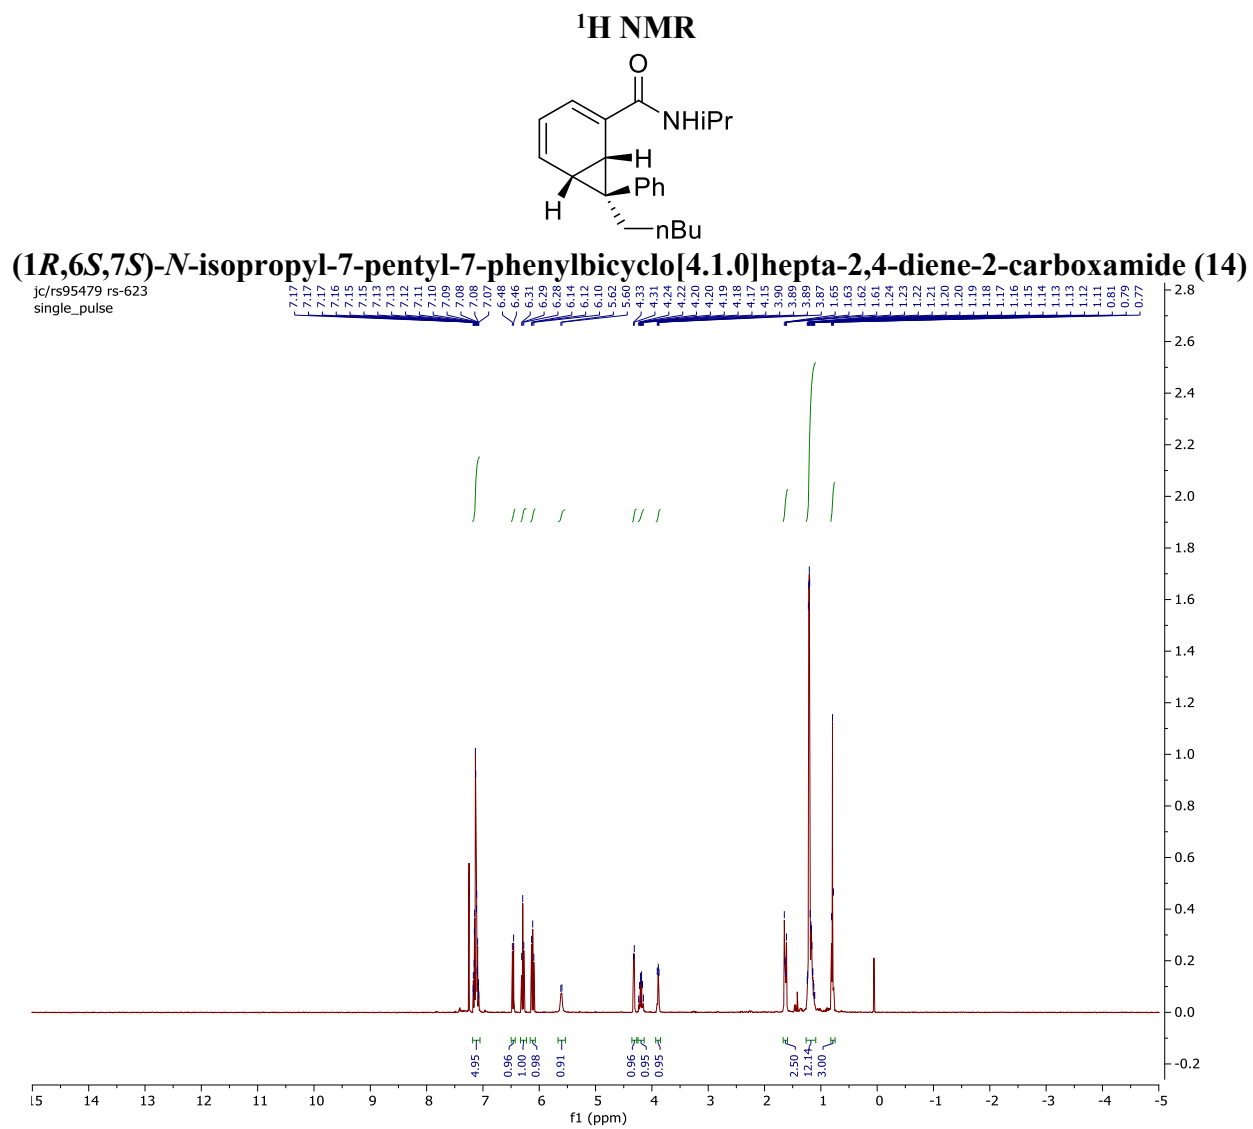

# COSY

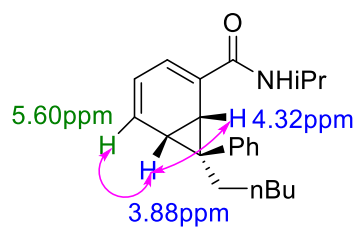

**(1R,6S,7S)-N-isopropyl-7-pentyl-7-phenylbicyclo[4.1.0]hepta-2,4-diene-2-carboxamide (14)**

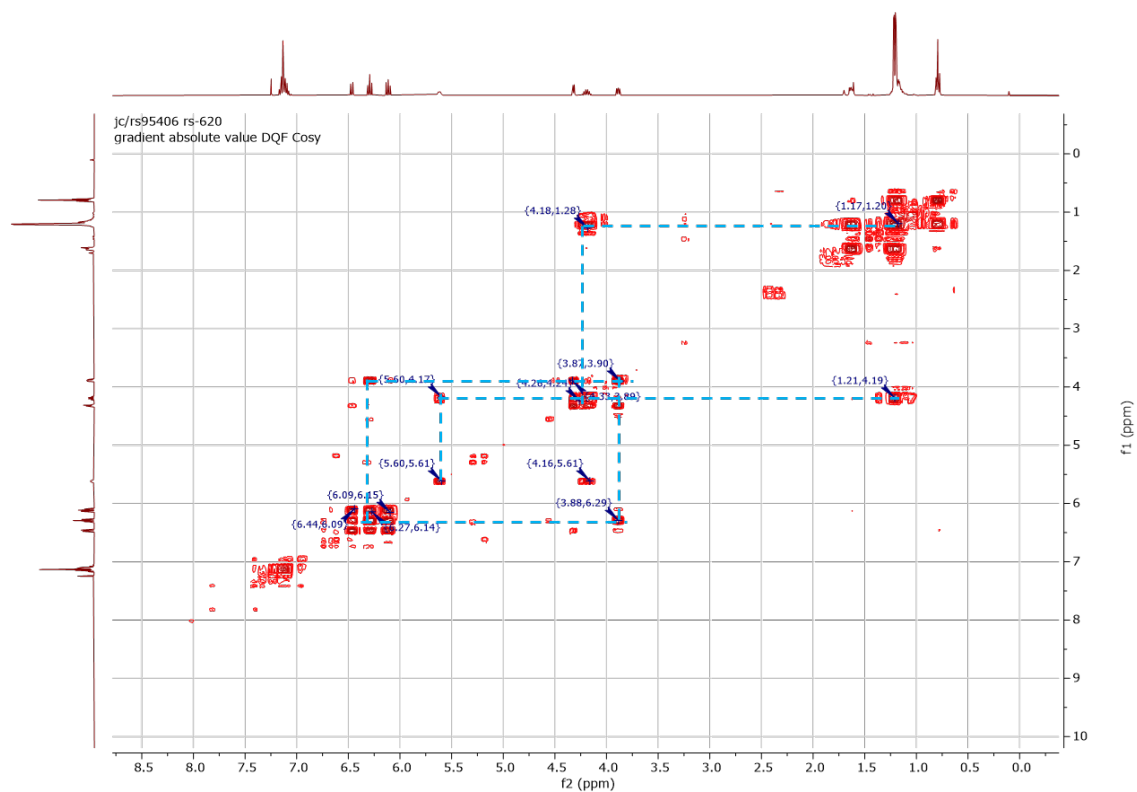

NOSY

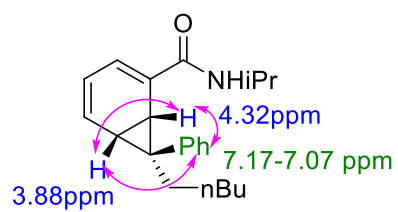

(1R,6S,7S)-N-isopropyl-7-pentyl-7-phenylbicyclo[4.1.0]hepta-2,4-diene-2-carboxamide (14)

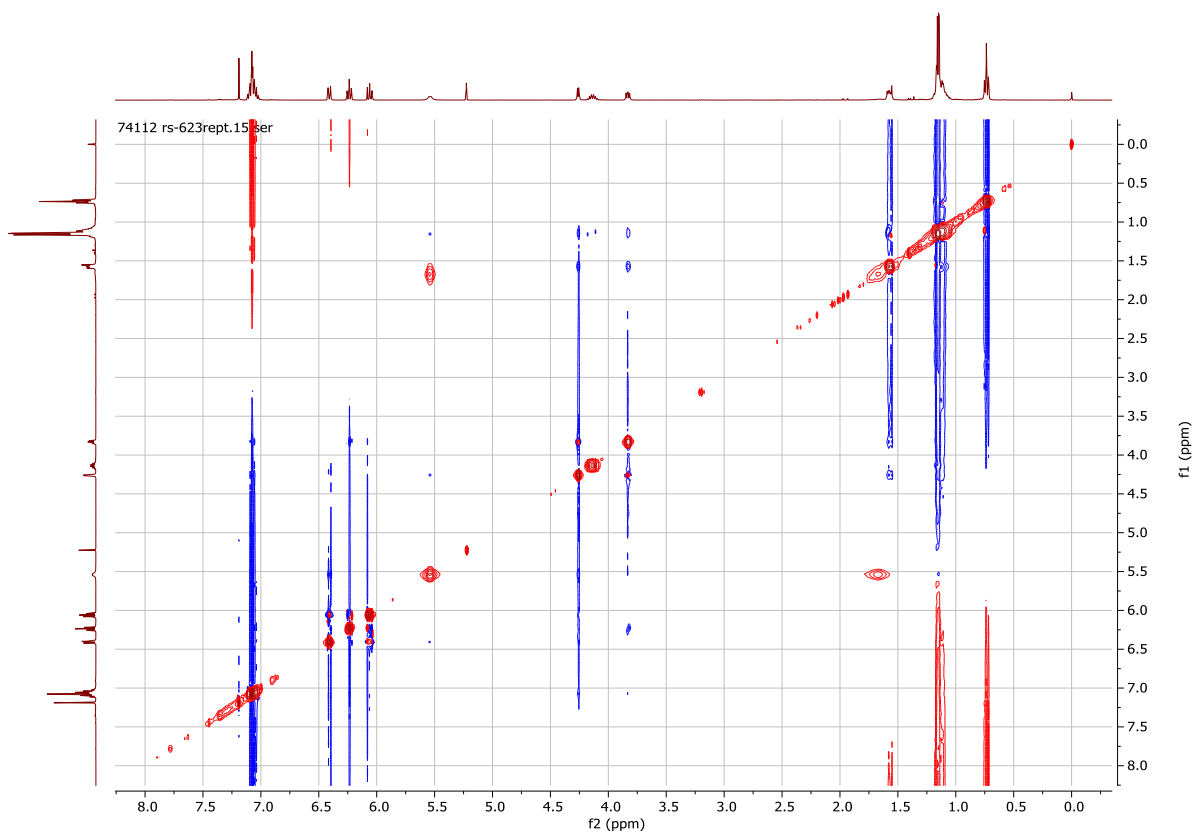



<sup>13</sup>C NMR

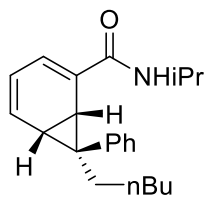

**(1R,6S,7S)-N-isopropyl-7-pentyl-7-phenylbicyclo[4.1.0]hepta-2,4-diene-2-carboxamide (14)**

jc/rs95479 rs-623  
single pulse decoupled gated NOE

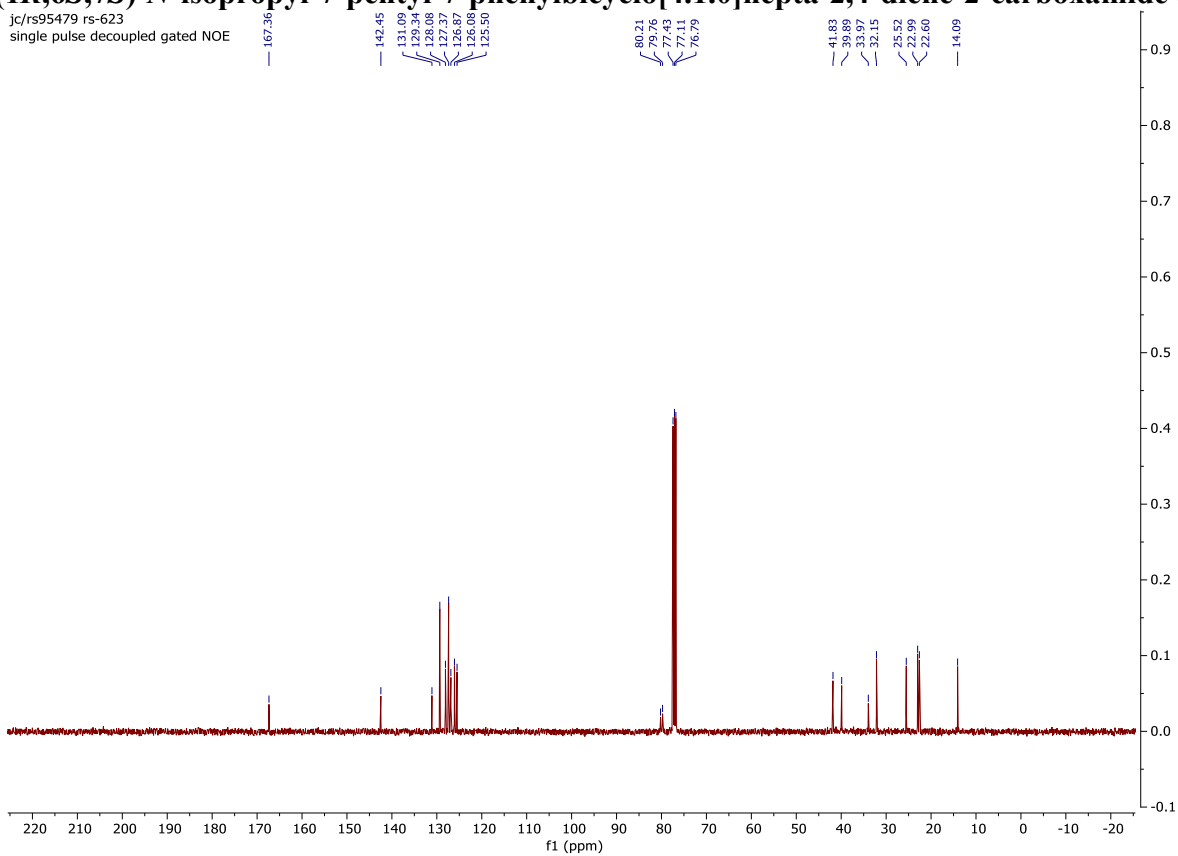

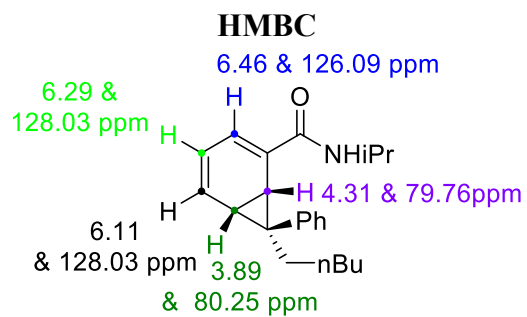

**(1*R*,6*S*,7*S*)-*N*-isopropyl-7-pentyl-7-phenylbicyclo[4.1.0]hepta-2,4-diene-2-carboxamide (14)**

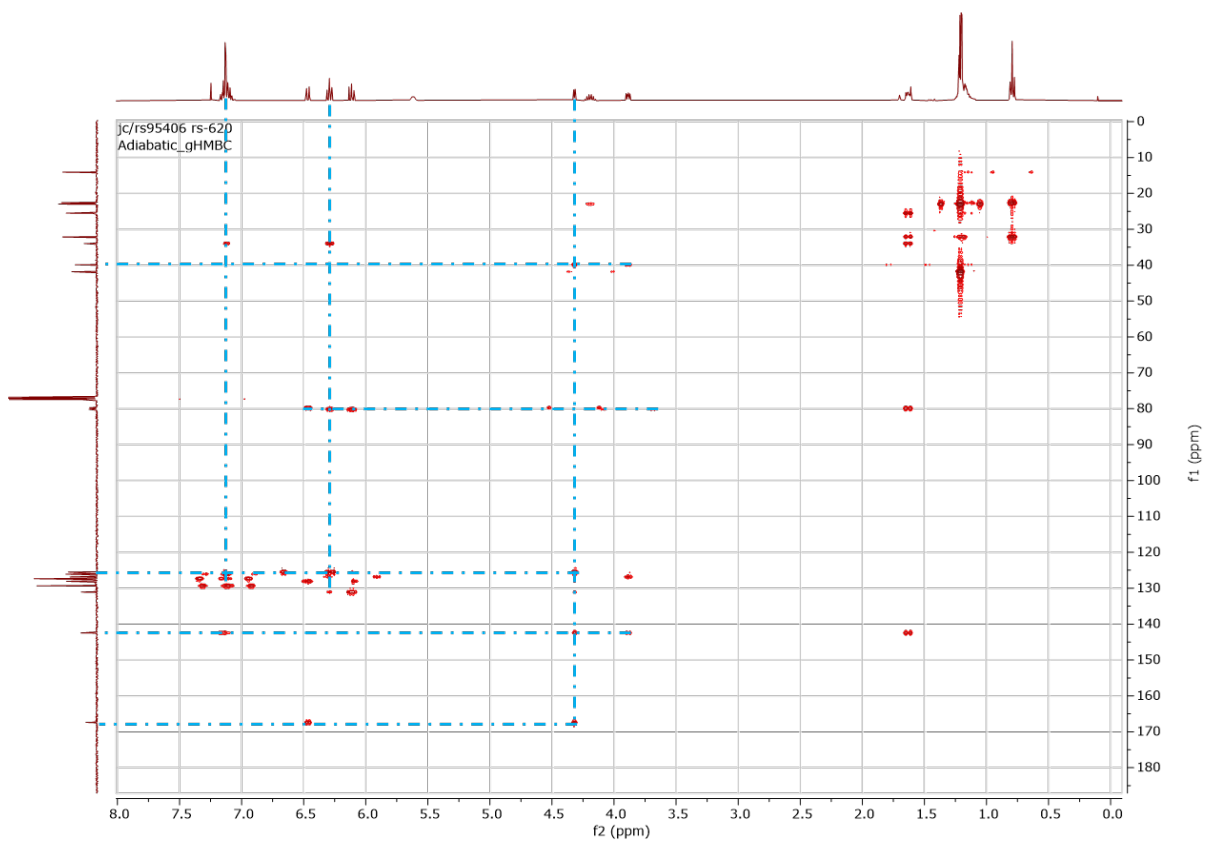

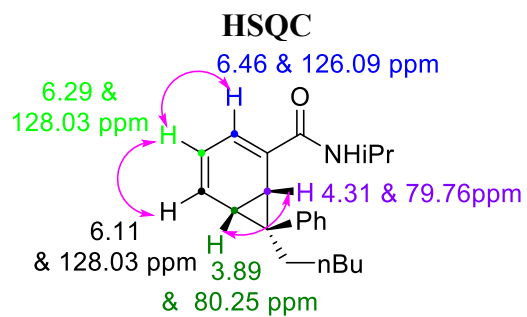

**(1*R*,6*S*,7*S*)-*N*-isopropyl-7-pentyl-7-phenylbicyclo[4.1.0]hepta-2,4-diene-2-carboxamide (14)**

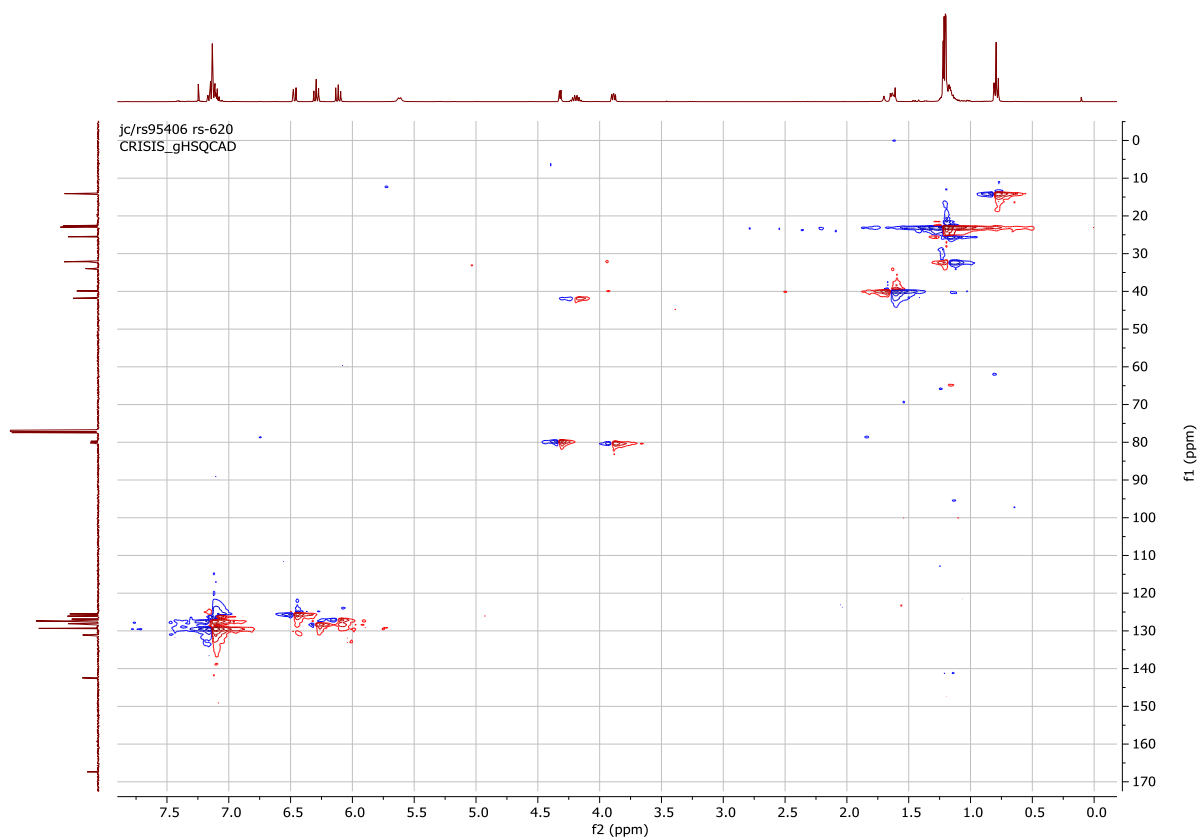

# HPLC

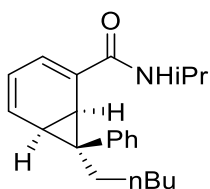

## (1R,6S,7S)-N-isopropyl-7-pentyl-7-phenylbicyclo[4.1.0]hepta-2,4-diene-2-carboxamide (14)

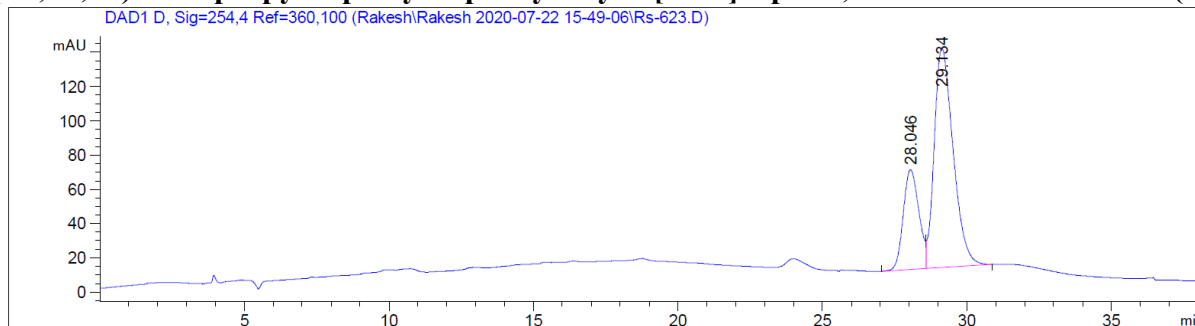

Signal 1: DAD1 D, Sig=254,4 Ref=360,100

| Peak # | RetTime [min] | Type | Width [min] | Area [mAU*s] | Height [mAU] | Area %  |
|--------|---------------|------|-------------|--------------|--------------|---------|
| 1      | 28.046        | BV   | 0.5827      | 2180.86279   | 58.26950     | 27.1906 |
| 2      | 29.134        | VB   | 0.6485      | 5839.78369   | 127.94576    | 72.8094 |

Totals : 8020.64648 186.21527

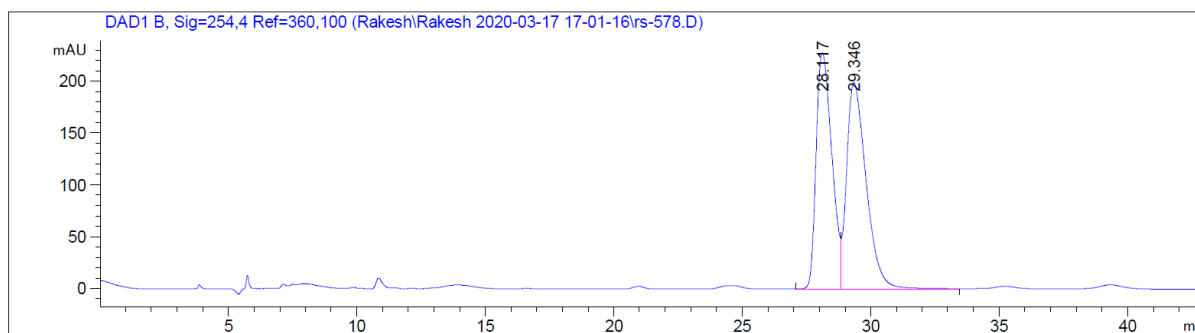

Signal 1: DAD1 B, Sig=254,4 Ref=360,100

| Peak # | RetTime [min] | Type | Width [min] | Area [mAU*s] | Height [mAU] | Area %  |
|--------|---------------|------|-------------|--------------|--------------|---------|
| 1      | 28.117        | BV   | 0.6686      | 9653.18652   | 227.72067    | 47.8699 |
| 2      | 29.346        | VB   | 0.8067      | 1.05123e4    | 198.88542    | 52.1301 |

Totals : 2.01654e4 426.60609
